# Supplementary material for: An exosome-mimicking membrane hybrid nanoplatform for targeted treatment toward Kras-mutant pancreatic carcinoma
Source: Royal Society of Chemistry journal article supplement (doi:10.1039/d1bm00446h), 2021-01-01
Supplement: d1bm00446h1.xlsx [file d1bm00446h1.xlsx]

## Sheet: Protein identification results
Protein IDs	Protein names	Gene names	Fasta headers	Number of proteins	Peptides	Unique peptides	Sequence coverage [%]	Mol. weight [kDa]	Sequence length	Score	Sequence coverage Exosome [%]	Sequence coverage Membrane [%]	LFQ intensity Exosome	LFQ intensity Membrane	Ratio(Membrane/Exosome)
E9Q3W4;Q6S390;Q6S388;Q6S392;Q6S393;Q6S387;Q6S385;Q9QXS1;A0A3B2W7J8;A0A0R4J218;E9PW24;A0A0R4J223;Q05CR3;Q8C8S5;E9Q9J6;A0A0R4J221;Q499F9;A0A2I3BRT4;Q8R0W0	Plectin	Plec	tr|E9Q3W4|E9Q3W4_MOUSE Plectin OS=Mus musculus OX=10090 GN=Plec PE=1 SV=1;tr|Q6S390|Q6S390_MOUSE Plectin 4 OS=Mus musculus OX=10090 GN=Plec PE=2 SV=1;tr|Q6S388|Q6S388_MOUSE Plectin 7 OS=Mus musculus OX=10090 GN=Plec PE=2 SV=1;tr|Q6S392|Q6S392_MOUSE Plectin	19	92	92	27	499.1	4386	323.31	9.1	26.7	725890000	4356300000	6.00132
Q5SXR6;Q68FD5;Q80U89;Q3UPJ3;Q3TYQ2;Q3U0H2;Q3TAN1;Q8K2I5;Q3TJ98;F6Z1R4	Clathrin heavy chain	Cltc	tr|Q5SXR6|Q5SXR6_MOUSE Clathrin heavy chain OS=Mus musculus OX=10090 GN=Cltc PE=1 SV=1;sp|Q68FD5|CLH1_MOUSE Clathrin heavy chain 1 OS=Mus musculus OX=10090 GN=Cltc PE=1 SV=3;tr|Q80U89|Q80U89_MOUSE MKIAA0034 protein (Fragment) OS=Mus musculus OX=10090 GN=mK	10	80	80	52.5	191.98	1679	323.31	52.5	49.4	108190000000	45859000000	0.423875
Q9JHU4;Q80U36;Q3TAZ3;Q8C6T5;Q923F5;Q3UA73;O08821;F6ZX84;O70182	Cytoplasmic dynein 1 heavy chain 1 (Cytoplasmic dynein heavy chain 1) (Dynein heavy chain, cytosolic)	Dync1h1 Dhc1 Dnch1 Dnchc1 Dyhc	sp|Q9JHU4|DYHC1_MOUSE Cytoplasmic dynein 1 heavy chain 1 OS=Mus musculus OX=10090 GN=Dync1h1 PE=1 SV=2	9	75	75	21.5	532.04	4644	323.31	20.5	18.9	2870900000	2321000000	0.808457
Q8VDD5;Q3UFT0;Q811J9;Q99JJ3;Q7TQJ6;A0A2R8VHF9;E9QPE7;A0A338P6K2;Q69ZX3;Q5SV64;Q3UH59;O08638;Q61879;Q80T68;A0A2R8VKI5;A2VCK0;Q8BLI3;Q8BLI1;Q8BIE2;Q8BWI3;A0A2R8W6V7;O89055;Q8BIM8;Q14B05;F2Z494;Q8BXF2;Q6PB65;Q4KMN4;Q7TQH2;Q8BLW0;Q3UUB1;Q3UQQ3;Q5BKR0;Q6P8P3;I6L963;E9Q264;B2RY26;B2RXX9;B2RWW8;Q2TAW4;B2RQQ1;B1AR69;G3UW82;B2RWX0;Q91Z83;P13542;Q02566;Q5SX39;P13541;A2AQP0;Q5SX40	Myosin-9 (Cellular myosin heavy chain, type A) (Myosin heavy chain 9) (Myosin heavy chain, non-muscle IIa) (Non-muscle myosin heavy chain A) (NMMHC-A) (Non-muscle myosin heavy chain IIa) (NMMHC II-a) (NMMHC-IIA)	Myh9	sp|Q8VDD5|MYH9_MOUSE Myosin-9 OS=Mus musculus OX=10090 GN=Myh9 PE=1 SV=4;tr|Q3UFT0|Q3UFT0_MOUSE Myosin_tail_1 domain-containing protein (Fragment) OS=Mus musculus OX=10090 GN=Myh9 PE=2 SV=1	51	72	68	42.6	226.37	1960	323.31	40.8	41.5	5657100000	7659400000	1.35394
P19096;A0A0U1RNJ1;Q3UHT6;Q3TB22;O89060;A0A0U1RPP5	Fatty acid synthase (EC 2.3.1.85) (Type I Fatty Acid Synthase) [Includes: [Acyl-carrier-protein] S-acetyltransferase (EC 2.3.1.38); [Acyl-carrier-protein] S-malonyltransferase (EC 2.3.1.39); 3-oxoacyl-[acyl-carrier-protein] synthase (EC 2.3.1.41); 3-oxoacyl-[acyl-carrier-protein] reductase (EC 1.1.1.100); 3-hydroxyacyl-[acyl-carrier-protein] dehydratase (EC 4.2.1.59); Enoyl-[acyl-carrier-protein]…	Fasn	sp|P19096|FAS_MOUSE Fatty acid synthase OS=Mus musculus OX=10090 GN=Fasn PE=1 SV=2;tr|A0A0U1RNJ1|A0A0U1RNJ1_MOUSE 3-hydroxyacyl-[acyl-carrier-protein] dehydratase OS=Mus musculus OX=10090 GN=Fasn PE=1 SV=1;tr|Q3UHT6|Q3UHT6_MOUSE 3-hydroxyacyl-[acyl-carrier	6	64	64	33.5	272.43	2504	323.31	33.1	30.1	6144300000	3615600000	0.588448
Q80TM2;P26039;Q3UHS6;Q0V930;Q3TBC3;F6S1V7;E9PUM4;B2RY15;A0A1L1SQ51;Q71LX4;A2AIM2;F6SX70;Q8CDM9;Q8CHG4;A0A1L1SRI1;Q8C9Z8;Q3TKJ2;Q6PB69;Q9CS79;A0A1L1SQP9;Q68FD6	MKIAA1027 protein (Fragment)	Tln1 mKIAA1027	tr|Q80TM2|Q80TM2_MOUSE MKIAA1027 protein (Fragment) OS=Mus musculus OX=10090 GN=Tln1 PE=2 SV=4;sp|P26039|TLN1_MOUSE Talin-1 OS=Mus musculus OX=10090 GN=Tln1 PE=1 SV=2;tr|Q3UHS6|Q3UHS6_MOUSE Uncharacterized protein OS=Mus musculus OX=10090 GN=Tln1 PE=2 SV=1	21	48	48	29.8	272.13	2564	323.31	29.8	26.1	2337500000	1539400000	0.658567
Q9JKF1;Q6ZQK2;Q80UW7;Q8CGH5;Q05CQ4;Q3TU98;Q8CDT3;Q8BPA6;Q3TPD2;Q3TR56;Q9D408;Q8CDW9;Q8CC64;A0A0U1RNG5;A0A0U1RPU3	Ras GTPase-activating-like protein IQGAP1	Iqgap1	sp|Q9JKF1|IQGA1_MOUSE Ras GTPase-activating-like protein IQGAP1 OS=Mus musculus OX=10090 GN=Iqgap1 PE=1 SV=2;tr|Q6ZQK2|Q6ZQK2_MOUSE MKIAA0051 protein (Fragment) OS=Mus musculus OX=10090 GN=Iqgap1 PE=2 SV=1;tr|Q80UW7|Q80UW7_MOUSE IQ motif containing GTPase	15	38	38	35	188.74	1657	323.31	32.8	32.3	1815900000	1939700000	1.06818
Q8CGC7;B9EIU1;A0A0A6YWA4;Q3UGD4;Q8BTR1;A0A0A6YWH3;Q9CRF9;Q3TMX9	Bifunctional glutamate/proline--tRNA ligase (Bifunctional aminoacyl-tRNA synthetase) [Includes: Glutamate--tRNA ligase (EC 6.1.1.17) (Glutamyl-tRNA synthetase) (GluRS); Proline--tRNA ligase (EC 6.1.1.15) (Prolyl-tRNA synthetase) (ProRS)]	Eprs1 Eprs Qprs	sp|Q8CGC7|SYEP_MOUSE Bifunctional glutamate/proline--tRNA ligase OS=Mus musculus OX=10090 GN=Eprs1 PE=1 SV=4;tr|B9EIU1|B9EIU1_MOUSE Glutamyl-tRNA synthetase OS=Mus musculus OX=10090 GN=Eprs PE=2 SV=1	8	37	37	33.3	170.08	1512	323.31	32.2	31.4	3195100000	2776300000	0.868924
Q6P4T2;Q8BYH6;Q7TMG2	U5 small nuclear ribonucleoprotein 200 kDa helicase (EC 3.6.4.13) (BRR2 homolog) (U5 snRNP-specific 200 kDa protein) (U5-200KD)	Snrnp200 Kiaa0788	sp|Q6P4T2|U520_MOUSE U5 small nuclear ribonucleoprotein 200 kDa helicase OS=Mus musculus OX=10090 GN=Snrnp200 PE=1 SV=1	3	36	36	20.3	244.54	2136	323.31	17.9	17.5	1436300000	1497200000	1.0424
Q5FWJ3;Q3V2S4;P20152;Q3U6S1;Q3TFD9;A0A0A6YWC8;Q3TWV0;Q3UAX1;Q3UD36;A4IF59;A2AKJ2;Q3V2C6;Q3V1K9;P31001;G5E846;A0A2R8W6R6;G3X981;P15331;Q9JJY2;P03995;A0MTM0;Q3UMG4;D3YZ35;Q05DD2;A0A0R4J036;Q80TQ3;P46660;P08551;P08553;P19246	Vimentin	Vim	tr|Q5FWJ3|Q5FWJ3_MOUSE Vimentin OS=Mus musculus OX=10090 GN=Vim PE=1 SV=1;tr|Q3V2S4|Q3V2S4_MOUSE Vimentin OS=Mus musculus OX=10090 GN=Vim PE=2 SV=1;sp|P20152|VIME_MOUSE Vimentin OS=Mus musculus OX=10090 GN=Vim PE=1 SV=3;tr|Q3U6S1|Q3U6S1_MOUSE Vimentin OS=M	30	38	35	66.3	53.687	466	323.31	42.9	66.3	1053900000	44405000000	42.134
Q3UDC8;P58252;Q6P9L9;Q8BMA8;Q3UZ14;Q3UMI7;Q3UBL9;Q3TX47;Q3TWX1;Q3TK17;Q3TLB1;Q3TJZ1;Q8C153;Q3TW58;Q3TSK4;Q3TPG2;Q99LT6;Q61509;O89069;O89070	Tr-type G domain-containing protein	Eef2	tr|Q3UDC8|Q3UDC8_MOUSE Tr-type G domain-containing protein OS=Mus musculus OX=10090 GN=Eef2 PE=2 SV=1;sp|P58252|EF2_MOUSE Elongation factor 2 OS=Mus musculus OX=10090 GN=Eef2 PE=1 SV=2;tr|Q6P9L9|Q6P9L9_MOUSE Eef2 protein (Fragment) OS=Mus musculus OX=10090	20	35	34	48.6	95.267	858	320.35	48.6	44.8	11228000000	6650800000	0.592341
Q80Y09;Q9WU78;Q6ZPS9	Pdcd6ip protein	Pdcd6ip	tr|Q80Y09|Q80Y09_MOUSE Pdcd6ip protein OS=Mus musculus OX=10090 GN=Pdcd6ip PE=2 SV=1;sp|Q9WU78|PDC6I_MOUSE Programmed cell death 6-interacting protein OS=Mus musculus OX=10090 GN=Pdcd6ip PE=1 SV=3;tr|Q6ZPS9|Q6ZPS9_MOUSE MKIAA1375 protein (Fragment) OS=Mus	3	34	34	46.9	96.31	872	323.31	46.9	39.1	5222600000	1450600000	0.277754
P52480;A0A1L1SU37;A0A1L1SQV8;A0A1L1SSN6;A0A1L1STV8;A0A1L1SUV0;A0A1L1ST52;A0A1L1SVH2	Pyruvate kinase PKM (EC 2.7.1.40) (Pyruvate kinase muscle isozyme)	Pkm Pk3 Pkm2 Pykm	sp|P52480|KPYM_MOUSE Pyruvate kinase PKM OS=Mus musculus OX=10090 GN=Pkm PE=1 SV=4	8	33	32	63.7	57.844	531	323.31	63.7	60.5	24109000000	8378500000	0.347526
P48678;D3YUF7;Q9CTL2;Q8BNX5	Prelamin-A/C [Cleaved into: Lamin-A/C]	Lmna Lmn1	sp|P48678|LMNA_MOUSE Prelamin-A/C OS=Mus musculus OX=10090 GN=Lmna PE=1 SV=2	4	31	31	45.6	74.237	665	303.8	31.7	43.5	699980000	5933300000	8.47639
Q3U4U6;P80318;Q3U0I3;E9Q133;Q3UJP4;F6Q609;Q3TBM6;Q9R1U1;F6ZVG8	T-complex protein 1 subunit gamma	Cct3	tr|Q3U4U6|Q3U4U6_MOUSE T-complex protein 1 subunit gamma OS=Mus musculus OX=10090 GN=Cct3 PE=1 SV=1;sp|P80318|TCPG_MOUSE T-complex protein 1 subunit gamma OS=Mus musculus OX=10090 GN=Cct3 PE=1 SV=1;tr|Q3U0I3|Q3U0I3_MOUSE T-complex protein 1 subunit gamma O	9	31	31	61.1	60.629	545	302.78	61.1	49.9	7628700000	2867400000	0.37587
Q7TPT7;Q790I0;Q3U3D3;Q9Z1Q9;G3UY93;Q3TII4;G3UZ22;G3UYW2;G3UZX1	Valyl-tRNA synthetase (EC 6.1.1.9)	Vars Vars2	tr|Q7TPT7|Q7TPT7_MOUSE Valyl-tRNA synthetase OS=Mus musculus OX=10090 GN=Vars PE=2 SV=1;tr|Q790I0|Q790I0_MOUSE Valyl-tRNA synthetase OS=Mus musculus OX=10090 GN=Vars PE=1 SV=1;tr|Q3U3D3|Q3U3D3_MOUSE Valyl-tRNA synthetase OS=Mus musculus OX=10090 GN=Vars PE	9	31	31	30.6	140.23	1263	323.31	30.6	14.3	4872100000	526830000	0.108132
E9QAI5;B2RQC6;G3UWN2;Q6P9L1;E9QAT6;Q7TN13;Q80VF8;Q9CWQ9;O88862;F6S3Z3	Aspartate carbamoyltransferase (EC 2.1.3.2) (EC 3.5.2.3) (EC 6.3.5.5) (CAD protein) (Dihydroorotase) (Glutamine-dependent carbamoyl-phosphate synthase)	Cad	tr|E9QAI5|E9QAI5_MOUSE Aspartate carbamoyltransferase OS=Mus musculus OX=10090 GN=Cad PE=1 SV=1;sp|B2RQC6|PYR1_MOUSE CAD protein OS=Mus musculus OX=10090 GN=Cad PE=1 SV=1;tr|G3UWN2|G3UWN2_MOUSE CAD protein OS=Mus musculus OX=10090 GN=Cad PE=1 SV=1;tr|Q6P9L	10	31	30	19.8	236.25	2162	279.45	14.8	19.2	345140000	1483300000	4.29768
Q9WVS5;Q3UL22;Q6A0F1;P42932;Q8BVY8;Q3UKQ2;H3BL49;Q9CS06;Q9CRW7;H3BJB6;H3BLL1;H3BKG2;H3BKR8	CCT-theta (T-complex protein 1 subunit theta)	Cctq	tr|Q9WVS5|Q9WVS5_MOUSE CCT-theta OS=Mus musculus OX=10090 GN=Cctq PE=3 SV=1;tr|Q3UL22|Q3UL22_MOUSE CCT-theta OS=Mus musculus OX=10090 GN=Cct8 PE=1 SV=1;tr|Q6A0F1|Q6A0F1_MOUSE CCT-theta (Fragment) OS=Mus musculus OX=10090 GN=Cct8 PE=2 SV=1;sp|P42932|TCPQ_MO	13	29	29	55.8	59.568	547	244.11	55.8	49.9	7086000000	2402500000	0.339049
B7FAV1;B7FAU9;Q8BTM8;B9EKP5;Q6KAM8;Q3U7N9;F6XC15;I7HPX4;F6Z2C0;Q4FZG4;J3JS91;Q9JJ37;F7AVL7	Filamin, alpha (Filamin-A) (Fragment)	Flna RP23-436K3.1-013	tr|B7FAV1|B7FAV1_MOUSE Filamin, alpha (Fragment) OS=Mus musculus OX=10090 GN=Flna PE=1 SV=1;tr|B7FAU9|B7FAU9_MOUSE Filamin, alpha OS=Mus musculus OX=10090 GN=Flna PE=1 SV=1;sp|Q8BTM8|FLNA_MOUSE Filamin-A OS=Mus musculus OX=10090 GN=Flna PE=1 SV=5;tr|B9EKP5	13	31	28	18.4	274.63	2583	224.68	13.5	18.4	597880000	1277400000	2.13655
G3X922;D4AFX7;Q3UX52;Q3UQJ7;Q8CHD7;Q8BNL1;Q3TNE7;A0A1L1STR9;A0A087WS25;A0A087WRC9	DnaJ heat shock protein family (Hsp40) member C13	Dnajc13	tr|G3X922|G3X922_MOUSE DnaJ heat shock protein family (Hsp40) member C13 OS=Mus musculus OX=10090 GN=Dnajc13 PE=1 SV=1;tr|D4AFX7|D4AFX7_MOUSE DnaJ heat shock protein family (Hsp40) member C13 OS=Mus musculus OX=10090 GN=Dnajc13 PE=1 SV=1	10	28	28	17	254.44	2243	229.74	7.6	17	124420000	861930000	6.92758
Q542X7;P80314;Q9JJD8;A0A1W2P7B7;A0A1W2P828;A0A1W2P6Q3;A0A1W2P871;A0A1W2P8B6	CCT-beta (T-complex protein 1 subunit beta)	Cct2	tr|Q542X7|Q542X7_MOUSE CCT-beta OS=Mus musculus OX=10090 GN=Cct2 PE=1 SV=1;sp|P80314|TCPB_MOUSE T-complex protein 1 subunit beta OS=Mus musculus OX=10090 GN=Cct2 PE=1 SV=4;tr|Q9JJD8|Q9JJD8_MOUSE CCT-beta OS=Mus musculus OX=10090 GN=Cct2 PE=2 SV=1	8	28	28	64.3	57.477	535	292.54	64.3	50.8	6242600000	1910400000	0.306026
Q3U6N7;Q3TJX0;Q61233;Q3U9M7;Q3U6Z1;D3YZ25;D3YVW8;D3Z7D9;D3Z311	Uncharacterized protein	Lcp1	tr|Q3U6N7|Q3U6N7_MOUSE Uncharacterized protein OS=Mus musculus OX=10090 GN=Lcp1 PE=2 SV=1;tr|Q3TJX0|Q3TJX0_MOUSE Uncharacterized protein OS=Mus musculus OX=10090 GN=Lcp1 PE=2 SV=1;sp|Q61233|PLSL_MOUSE Plastin-2 OS=Mus musculus OX=10090 GN=Lcp1 PE=1 SV=4;tr	9	30	28	59.5	70.208	627	283.16	59.5	50.2	4382800000	1096800000	0.250251
Q9D0I9;Q3TVC5;Q3UAZ3	Arginine--tRNA ligase, cytoplasmic (EC 6.1.1.19) (Arginyl-tRNA synthetase) (ArgRS)	Rars1 Rars	sp|Q9D0I9|SYRC_MOUSE Arginine--tRNA ligase, cytoplasmic OS=Mus musculus OX=10090 GN=Rars1 PE=1 SV=2;tr|Q3TVC5|Q3TVC5_MOUSE Arginine--tRNA ligase, cytoplasmic (Fragment) OS=Mus musculus OX=10090 GN=Rars PE=2 SV=1;tr|Q3UAZ3|Q3UAZ3_MOUSE Arginine--tRNA ligase	3	28	28	42	75.673	660	225.81	42	37.9	2123200000	1734400000	0.81688
Q3UHQ5;E9PVA8;Q8CHH7;Q8BIX2;Q6PGM5;Q640Q4;Q3U3Z4;Q6NV94;Q8BTM7	TOG domain-containing protein	Gcn1 Gcn1l1	tr|Q3UHQ5|Q3UHQ5_MOUSE TOG domain-containing protein OS=Mus musculus OX=10090 GN=Gcn1 PE=2 SV=1;sp|E9PVA8|GCN1_MOUSE eIF-2-alpha kinase activator GCN1 OS=Mus musculus OX=10090 GN=Gcn1 PE=1 SV=1;tr|Q8CHH7|Q8CHH7_MOUSE MKIAA0219 protein (Fragment) OS=Mus mus	9	28	27	13.8	292.99	2671	179.79	12.5	12.3	263360000	419830000	1.59413
P23116;Q3TKF9;Q3UM46;Q3UL99;Q6A0B9;Q3UEK3;Q3TRH1;A0A494B9I0	Eukaryotic translation initiation factor 3 subunit A (eIF3a) (Centrosomin) (Eukaryotic translation initiation factor 3 subunit 10) (eIF-3-theta) (eIF3 p167) (eIF3 p180) (eIF3 p185) (p162)	Eif3a Csma Eif3 Eif3s10	sp|P23116|EIF3A_MOUSE Eukaryotic translation initiation factor 3 subunit A OS=Mus musculus OX=10090 GN=Eif3a PE=1 SV=5;tr|Q3TKF9|Q3TKF9_MOUSE PCI domain-containing protein (Fragment) OS=Mus musculus OX=10090 GN=Eif3a PE=2 SV=1;tr|Q3UM46|Q3UM46_MOUSE PCI do	8	27	27	23.8	161.93	1344	220.87	22.8	20.3	1670400000	515280000	0.308477
Q99PV0;B7ZC27;Q3UNG1;Q3TI71	Pre-mRNA-processing-splicing factor 8 (Splicing factor Prp8)	Prpf8 Prp8	sp|Q99PV0|PRP8_MOUSE Pre-mRNA-processing-splicing factor 8 OS=Mus musculus OX=10090 GN=Prpf8 PE=1 SV=2	4	27	27	15.2	273.61	2335	204.44	10.8	14.9	382710000	824320000	2.1539
Q71LX8;P11499;Q811H6;Q80YC2;E9Q3D6;E9PX27;E9Q0C3;D3Z1R1;Q922F6	Heat shock protein 84b (Heat shock protein 90 alpha (Cytosolic), class B member 1)	Hsp90ab1 Hsp84b Hspcb	tr|Q71LX8|Q71LX8_MOUSE Heat shock protein 84b OS=Mus musculus OX=10090 GN=Hsp90ab1 PE=1 SV=1;sp|P11499|HS90B_MOUSE Heat shock protein HSP 90-beta OS=Mus musculus OX=10090 GN=Hsp90ab1 PE=1 SV=3	9	42	26	53.2	83.28	724	323.31	53.2	44.9	23256000000	7752400000	0.333351
Q3TXV1;Q3TW71;Q3TKV1;Q8VDM4;Q3TIP0;Q3TI61;Q3U9Y8;Q3TWL6;Q80V77;Q99JX8;A0A338P6M5;Q9CRK7;A0A338P7H4;E9Q2S8;A0A338P6S9	26S proteasome non-ATPase regulatory subunit 2	Psmd2	tr|Q3TXV1|Q3TXV1_MOUSE 26S proteasome non-ATPase regulatory subunit 2 OS=Mus musculus OX=10090 GN=Psmd2 PE=2 SV=1;tr|Q3TW71|Q3TW71_MOUSE 26S proteasome non-ATPase regulatory subunit 2 OS=Mus musculus OX=10090 GN=Psmd2 PE=2 SV=1;tr|Q3TKV1|Q3TKV1_MOUSE 26S p	15	26	26	34.9	100.14	908	230.79	34.9	27.6	2219700000	1091000000	0.491508
Q542I8;P11835;M0QWA7;D3YYP8;D3Z1S4;M0QWJ6	Integrin beta	Itgb2	tr|Q542I8|Q542I8_MOUSE Integrin beta OS=Mus musculus OX=10090 GN=Itgb2 PE=1 SV=1;sp|P11835|ITB2_MOUSE Integrin beta-2 OS=Mus musculus OX=10090 GN=Itgb2 PE=1 SV=2;tr|M0QWA7|M0QWA7_MOUSE Integrin beta OS=Mus musculus OX=10090 GN=Itgb2 PE=1 SV=1	6	25	25	41.3	84.893	770	198.25	41.3	35.5	2320400000	1191200000	0.51336
Q3UPL0;S4R2A9;S4R256;Q9CVL3;S4R1T5;S4R192;S4R1Y8;Q05DS7	Protein transport protein Sec31A (SEC31-like protein 1) (SEC31-related protein A)	Sec31a Sec31l1	sp|Q3UPL0|SC31A_MOUSE Protein transport protein Sec31A OS=Mus musculus OX=10090 GN=Sec31a PE=1 SV=2;tr|S4R2A9|S4R2A9_MOUSE Protein transport protein Sec31A (Fragment) OS=Mus musculus OX=10090 GN=Sec31a PE=1 SV=1	8	25	25	23.4	133.57	1230	280.23	23.4	19.4	2156300000	821850000	0.381139
Q922D8;Q3TW74;Q3UZH3;A0A1W2P733;Q8BXX7;A0A1W2P7L5;Q8BY49	C-1-tetrahydrofolate synthase, cytoplasmic (C1-THF synthase) [Cleaved into: C-1-tetrahydrofolate synthase, cytoplasmic, N-terminally processed] [Includes: Methylenetetrahydrofolate dehydrogenase (EC 1.5.1.5); Methenyltetrahydrofolate cyclohydrolase (EC 3.5.4.9); Formyltetrahydrofolate synthetase (EC 6.3.4.3)]	Mthfd1	sp|Q922D8|C1TC_MOUSE C-1-tetrahydrofolate synthase, cytoplasmic OS=Mus musculus OX=10090 GN=Mthfd1 PE=1 SV=4;tr|Q3TW74|Q3TW74_MOUSE C-1-tetrahydrofolate synthase, cytoplasmic OS=Mus musculus OX=10090 GN=Mthfd1 PE=2 SV=1;tr|Q3UZH3|Q3UZH3_MOUSE C-1-tetrahydr	7	26	25	35.4	101.2	935	274.13	35.4	24.6	2023900000	607210000	0.30002
B7ZWC4;Q07113;B9EKB8;Q8C2F9;Q8C6V9;Q8K0J1;Q80VF2;Q7TMR1;Q4L138	Insulin-like growth factor 2 receptor	Igf2r	tr|B7ZWC4|B7ZWC4_MOUSE Insulin-like growth factor 2 receptor OS=Mus musculus OX=10090 GN=Igf2r PE=2 SV=1;sp|Q07113|MPRI_MOUSE Cation-independent mannose-6-phosphate receptor OS=Mus musculus OX=10090 GN=Igf2r PE=1 SV=1;tr|B9EKB8|B9EKB8_MOUSE Insulin-like gr	9	24	24	11.7	273.86	2483	179.42	11.7	9.1	931690000	780300000	0.83751
Q8BTF0;F8WHL2;Q8CIE6;Q63ZW9;Q8BTF3;Q8R393;Q99JW9;F6XJN3;Q3TAU7;Q9ET41	Coatomer subunit alpha	Copa	tr|Q8BTF0|Q8BTF0_MOUSE Coatomer subunit alpha OS=Mus musculus OX=10090 GN=Copa PE=2 SV=1;tr|F8WHL2|F8WHL2_MOUSE Coatomer subunit alpha OS=Mus musculus OX=10090 GN=Copa PE=1 SV=1;sp|Q8CIE6|COPA_MOUSE Coatomer subunit alpha OS=Mus musculus OX=10090 GN=Copa P	10	24	24	23.4	138.52	1224	196.1	23.4	20.6	1211700000	1230000000	1.0151
Q3UI56;P14824;F8WIT2;Q3UDK4;Q3TUI1;Q99JX6;Q3V2Z4;Q8CEX0	Annexin	Anxa6	tr|Q3UI56|Q3UI56_MOUSE Annexin OS=Mus musculus OX=10090 GN=Anxa6 PE=2 SV=1;sp|P14824|ANXA6_MOUSE Annexin A6 OS=Mus musculus OX=10090 GN=Anxa6 PE=1 SV=3;tr|F8WIT2|F8WIT2_MOUSE Annexin OS=Mus musculus OX=10090 GN=Anxa6 PE=1 SV=1;tr|Q3UDK4|Q3UDK4_MOUSE Annexi	8	24	24	43.5	75.911	673	215.3	43.5	37.7	1201100000	1456100000	1.21231
P50516;D3Z1B9;D3YWH3;D3YZ23	V-type proton ATPase catalytic subunit A (V-ATPase subunit A) (EC 7.1.2.2) (V-ATPase 69 kDa subunit) (Vacuolar proton pump subunit alpha)	Atp6v1a Atp6a1 Atp6a2 Atp6v1a1	sp|P50516|VATA_MOUSE V-type proton ATPase catalytic subunit A OS=Mus musculus OX=10090 GN=Atp6v1a PE=1 SV=2	4	24	24	49.8	68.325	617	229.42	42.1	49.8	924530000	4543000000	4.91385
Q01853;Q8BNF8	Transitional endoplasmic reticulum ATPase (TER ATPase) (EC 3.6.4.6) (15S Mg(2+)-ATPase p97 subunit) (Valosin-containing protein) (VCP)	Vcp	sp|Q01853|TERA_MOUSE Transitional endoplasmic reticulum ATPase OS=Mus musculus OX=10090 GN=Vcp PE=1 SV=4;tr|Q8BNF8|Q8BNF8_MOUSE Uncharacterized protein OS=Mus musculus OX=10090 GN=Vcp PE=2 SV=1	2	24	24	41.1	89.321	806	185.54	39.6	27.5	1327600000	982590000	0.740125
Q3V117;Q91V92;Q3TED3;Q3UEA1;Q3TS02;Q3UVY4;Q99K05;Q6P063	ATP-citrate synthase (EC 2.3.3.8) (ATP-citrate (pro-S-)-lyase) (Citrate cleavage enzyme)	Acly	tr|Q3V117|Q3V117_MOUSE ATP-citrate synthase OS=Mus musculus OX=10090 GN=Acly PE=1 SV=1;sp|Q91V92|ACLY_MOUSE ATP-citrate synthase OS=Mus musculus OX=10090 GN=Acly PE=1 SV=1;tr|Q3TED3|Q3TED3_MOUSE ATP-citrate synthase OS=Mus musculus OX=10090 GN=Acly PE=2 SV	8	24	24	29.2	120.79	1101	186.29	29.2	21.2	1015400000	318290000	0.313463
E9QB02;Q68FL6;F6W0G8	Methionine--tRNA ligase, cytoplasmic (EC 6.1.1.10) (Methionyl-tRNA synthetase)	Mars1 Mars	tr|E9QB02|E9QB02_MOUSE Methionine--tRNA ligase, cytoplasmic OS=Mus musculus OX=10090 GN=Mars1 PE=1 SV=1;sp|Q68FL6|SYMC_MOUSE Methionine--tRNA ligase, cytoplasmic OS=Mus musculus OX=10090 GN=Mars1 PE=1 SV=1	3	23	23	31.2	102.37	910	197.49	25.3	29.7	941060000	1232900000	1.31012
Q3UKJ6;Q3TFE5;O35286;Q497W9;A0A0G2JG10;Q3UDX4;A0A0G2JGQ5;Q3THD5	RNA helicase (EC 3.6.4.13)	Dhx15	tr|Q3UKJ6|Q3UKJ6_MOUSE RNA helicase OS=Mus musculus OX=10090 GN=Dhx15 PE=1 SV=1;tr|Q3TFE5|Q3TFE5_MOUSE RNA helicase OS=Mus musculus OX=10090 GN=Dhx15 PE=2 SV=1;sp|O35286|DHX15_MOUSE Pre-mRNA-splicing factor ATP-dependent RNA helicase DHX15 OS=Mus musculus	8	23	23	28.8	91.006	795	166.04	27.4	20.6	1318400000	1115600000	0.846177
S4R1M0;P06800;Q3U382;Q8C6Q7;Q64730;A1E2H6;Q5XFY7;Q05C79;A0A0A6YXM4	Protein-tyrosine-phosphatase (EC 3.1.3.48)	Ptprc	tr|S4R1M0|S4R1M0_MOUSE Protein-tyrosine-phosphatase OS=Mus musculus OX=10090 GN=Ptprc PE=1 SV=1;sp|P06800|PTPRC_MOUSE Receptor-type tyrosine-protein phosphatase C OS=Mus musculus OX=10090 GN=Ptprc PE=1 SV=4;tr|Q3U382|Q3U382_MOUSE Protein-tyrosine-phosphata	9	23	23	27.1	128.57	1130	194.19	26.5	25.1	1548200000	895040000	0.578117
Q91V38;Q3UAD6;P08113;Q3UBU0;Q3TUD6;Q8CCY5;F7C312;Q8C2R2;Q9CW12	Heat shock protein 90, beta (Grp94), member 1	Hsp90b1	tr|Q91V38|Q91V38_MOUSE Heat shock protein 90, beta (Grp94), member 1 OS=Mus musculus OX=10090 GN=Hsp90b1 PE=2 SV=1;tr|Q3UAD6|Q3UAD6_MOUSE HATPase_c domain-containing protein OS=Mus musculus OX=10090 GN=Hsp90b1 PE=1 SV=1;sp|P08113|ENPL_MOUSE Endoplasmin OS=	9	25	23	34.5	92.489	802	192.11	20.3	34.5	356660000	3150200000	8.8325
Q3UBA6;Q3TH56;Q3TEK2;P63017;Q3ULM1;Q504P4;Q3U9L2;Q3TQ13;Q3TZJ3;Q3TRH3;Q3TF16;Q3UDS0;Q3TB63;Q3KQJ4;Q3TH04;Q3UXU1;B7U582;P17156;Q3UBR0;D3Z5E2;B2CSK2;A1L347;Q3TU85;Q3TAI8;A1E2B8;P16627;Q61696;P17879;Q9QZ38;Q9R2A1;Q61698;Q9QWU1;O88687;O88688;Q91ZU5;Q91ZU4	Uncharacterized protein	Hspa8	tr|Q3UBA6|Q3UBA6_MOUSE Uncharacterized protein OS=Mus musculus OX=10090 GN=Hspa8 PE=2 SV=1;tr|Q3TH56|Q3TH56_MOUSE Uncharacterized protein OS=Mus musculus OX=10090 GN=Hspa8 PE=2 SV=1;tr|Q3TEK2|Q3TEK2_MOUSE Uncharacterized protein OS=Mus musculus OX=10090 GN	36	25	23	44.7	70.898	646	284.67	44.7	43.5	14913000000	5065800000	0.33969
P80316;E0CZA1	T-complex protein 1 subunit epsilon (TCP-1-epsilon) (CCT-epsilon)	Cct5 Ccte Kiaa0098	sp|P80316|TCPE_MOUSE T-complex protein 1 subunit epsilon OS=Mus musculus OX=10090 GN=Cct5 PE=1 SV=1	2	23	23	54.9	59.623	541	191.97	53	50.1	3497800000	1060000000	0.303048
Q64737;Q3UJP8;Q3TH49;D6RCG1;A0A338P6X4;A0A338P676;A0A338P6T2	Trifunctional purine biosynthetic protein adenosine-3 [Includes: Phosphoribosylamine--glycine ligase (EC 6.3.4.13) (Glycinamide ribonucleotide synthetase) (GARS) (Phosphoribosylglycinamide synthetase); Phosphoribosylformylglycinamidine cyclo-ligase (EC 6.3.3.1) (AIR synthase) (AIRS) (Phosphoribosyl-aminoimidazole synthetase); Phosphoribosylglycinamide formyltransferase (EC 2.1.2.2) (5'-phosphorib…	Gart	sp|Q64737|PUR2_MOUSE Trifunctional purine biosynthetic protein adenosine-3 OS=Mus musculus OX=10090 GN=Gart PE=1 SV=3;tr|Q3UJP8|Q3UJP8_MOUSE Trifunctional purine biosynthetic protein adenosine-3 OS=Mus musculus OX=10090 GN=Gart PE=2 SV=1;tr|Q3TH49|Q3TH49_M	7	23	23	33.8	107.5	1010	204.61	32.9	24.5	1850000000	779520000	0.421362
B9EHN0;A0A1S6GWH5;Q02053;P31254;Q61341	Ubiquitin-activating enzyme E1 (EC 6.2.1.45)	Uba1	tr|B9EHN0|B9EHN0_MOUSE Ubiquitin-activating enzyme E1 OS=Mus musculus OX=10090 GN=Uba1 PE=1 SV=1;tr|A0A1S6GWH5|A0A1S6GWH5_MOUSE Ubiquitin-activating enzyme E1 OS=Mus musculus OX=10090 GN=Uba1 PE=2 SV=1;sp|Q02053|UBA1_MOUSE Ubiquitin-like modifier-activatin	5	22	22	26.7	117.81	1058	219.21	26.7	19.4	2585300000	684080000	0.264604
Q3UCJ0;P29351;Q3UB72;Q3TE70;G3UYY5;G3UZU6;G3UXM2	Tyrosine-protein phosphatase non-receptor type (EC 3.1.3.48)	Ptpn6	tr|Q3UCJ0|Q3UCJ0_MOUSE Tyrosine-protein phosphatase non-receptor type OS=Mus musculus OX=10090 GN=Ptpn6 PE=2 SV=1;sp|P29351|PTN6_MOUSE Tyrosine-protein phosphatase non-receptor type 6 OS=Mus musculus OX=10090 GN=Ptpn6 PE=1 SV=2;tr|Q3UB72|Q3UB72_MOUSE Tyros	7	22	22	42.9	67.716	597	181.64	40.2	42.9	1693900000	1750300000	1.0333
Q3UZI3;Q3TW51;Q78PY7;Q3TRW3;Q3TJ56;E9Q3E9	Staphylococcal nuclease domain-containing protein (EC 3.1.31.1)	Snd1 AL033314	tr|Q3UZI3|Q3UZI3_MOUSE Staphylococcal nuclease domain-containing protein OS=Mus musculus OX=10090 GN=Snd1 PE=2 SV=1;tr|Q3TW51|Q3TW51_MOUSE Staphylococcal nuclease domain-containing protein OS=Mus musculus OX=10090 GN=Snd1 PE=2 SV=1;sp|Q78PY7|SND1_MOUSE Sta	6	22	22	32.4	102.09	910	209.13	32.4	25.6	1452800000	1204200000	0.828882
Q3U2W2;Q7TPV4;A0JLT5;Q3TLF6	Uncharacterized protein	Mybbp1a	tr|Q3U2W2|Q3U2W2_MOUSE Uncharacterized protein OS=Mus musculus OX=10090 GN=Mybbp1a PE=1 SV=1;sp|Q7TPV4|MBB1A_MOUSE Myb-binding protein 1A OS=Mus musculus OX=10090 GN=Mybbp1a PE=1 SV=2;tr|A0JLT5|A0JLT5_MOUSE Mybbp1a protein (Fragment) OS=Mus musculus OX=100	4	22	22	23.2	152.04	1344	201.3	18.3	23.2	647860000	2140000000	3.30318
Q8BKC5;Q3TT04;Q7TN23;Q9CYG6;Q6NZC1;A3KMD2;Q8BIV3	Importin-5 (Imp5) (Importin subunit beta-3) (Karyopherin beta-3) (Ran-binding protein 5) (RanBP5)	Ipo5 Kpnb3 Ranbp5	sp|Q8BKC5|IPO5_MOUSE Importin-5 OS=Mus musculus OX=10090 GN=Ipo5 PE=1 SV=3;tr|Q3TT04|Q3TT04_MOUSE Importin N-terminal domain-containing protein OS=Mus musculus OX=10090 GN=Ipo5 PE=2 SV=1;tr|Q7TN23|Q7TN23_MOUSE Ipo5 protein (Fragment) OS=Mus musculus OX=100	7	22	22	30.2	123.59	1097	188.53	30.2	25.2	1964500000	707000000	0.359888
Q8VDN2;Q3TXF9;Q8R3M4;Q3UCH8;Q8K2R2;Q3UF49	Sodium/potassium-transporting ATPase subunit alpha-1 (Na(+)/K(+) ATPase alpha-1 subunit) (EC 7.2.2.13) (Sodium pump subunit alpha-1)	Atp1a1	sp|Q8VDN2|AT1A1_MOUSE Sodium/potassium-transporting ATPase subunit alpha-1 OS=Mus musculus OX=10090 GN=Atp1a1 PE=1 SV=1;tr|Q3TXF9|Q3TXF9_MOUSE Sodium/potassium-transporting ATPase subunit alpha OS=Mus musculus OX=10090 GN=Atp1a1 PE=2 SV=1;tr|Q8R3M4|Q8R3M4_	6	35	22	38.5	112.98	1023	323.31	38.4	36.4	7674400000	8726600000	1.13711
A0A1S6GWH4;Q1HFZ0;H3BKN0;H3BJF3	NOL1/NOP2/Sun domain family member 2 (EC 2.1.1.203) (mRNA cytosine C(5)-methyltransferase) (tRNA cytosine C(5)-methyltransferase)	Nsun2	tr|A0A1S6GWH4|A0A1S6GWH4_MOUSE NOL1/NOP2/Sun domain family member 2 OS=Mus musculus OX=10090 GN=Nsun2 PE=2 SV=1;sp|Q1HFZ0|NSUN2_MOUSE RNA cytosine C(5)-methyltransferase NSUN2 OS=Mus musculus OX=10090 GN=Nsun2 PE=1 SV=2;tr|H3BKN0|H3BKN0_MOUSE NOL1/NOP2/Sun	4	21	21	36.4	88.067	782	148.11	34.1	33.9	990340000	773180000	0.780722
Q3TD86;E9Q604;G5E8F1;Q3U3F0;E9Q5K8;Q3U1U4;Q3U1W4;Q3TBT0;Q3U4I5;P05555;A0A0R4J1B4;Q3UJ88;A1E2I0;D6RJ73	VWFA domain-containing protein		tr|Q3TD86|Q3TD86_MOUSE VWFA domain-containing protein OS=Mus musculus OX=10090 PE=2 SV=1;tr|E9Q604|E9Q604_MOUSE Integrin alpha-M OS=Mus musculus OX=10090 GN=Itgam PE=1 SV=2;tr|G5E8F1|G5E8F1_MOUSE Integrin alpha-M OS=Mus musculus OX=10090 GN=Itgam PE=1 SV=2	14	21	21	25.5	127.4	1153	167.38	23.9	20.9	1123700000	793220000	0.7059
Q80Y52;P07901;Q3UIF3;Q3TKA2;A0PJ91;Q3TKB9;Q3TKG0;Q8C5U3;Q3TJU7;B7ZC50;Q8C2A9;A2A6A2;B7ZC49;REV__Q8BL66	Heat shock protein 90, alpha (Cytosolic), class A member 1	Hsp90aa1 Hspca	tr|Q80Y52|Q80Y52_MOUSE Heat shock protein 90, alpha (Cytosolic), class A member 1 OS=Mus musculus OX=10090 GN=Hsp90aa1 PE=1 SV=2;sp|P07901|HS90A_MOUSE Heat shock protein HSP 90-alpha OS=Mus musculus OX=10090 GN=Hsp90aa1 PE=1 SV=4;tr|Q3UIF3|Q3UIF3_MOUSE HAT	14	35	21	41.2	84.787	733	218.51	41.2	40.8	6651600000	2285600000	0.343617
Q8CD23;Q3TL52;P09405;Q3TT41;Q3TGR3;Q8CE30;Q9CT46	Nucleolin	Ncl	tr|Q8CD23|Q8CD23_MOUSE Nucleolin OS=Mus musculus OX=10090 GN=Ncl PE=2 SV=1;tr|Q3TL52|Q3TL52_MOUSE Nucleolin OS=Mus musculus OX=10090 GN=Ncl PE=2 SV=1;sp|P09405|NUCL_MOUSE Nucleolin OS=Mus musculus OX=10090 GN=Ncl PE=1 SV=2;tr|Q3TT41|Q3TT41_MOUSE Nucleolin	7	21	21	29.7	76.864	707	163.11	25.3	29.7	826820000	2378600000	2.87681
P11983;W0TYI4;F2Z483;Q6LBL9;Q62291;Q9QZ34;Q62289;Q9QZ36;Q9QZ35;Q62290;Q9QZ33;A0A3B2WDE2	T-complex protein 1 subunit alpha (TCP-1-alpha) (CCT-alpha) (Tailless complex polypeptide 1A) (TCP-1-A) (Tailless complex polypeptide 1B) (TCP-1-B)	Tcp1 Cct1 Ccta	sp|P11983|TCPA_MOUSE T-complex protein 1 subunit alpha OS=Mus musculus OX=10090 GN=Tcp1 PE=1 SV=3	12	21	21	45.1	60.448	556	179.96	45.1	45	4738500000	1823300000	0.384784
Q8C5Q5;Q3TIJ7;P80313;Q3UIJ0;Q3TJN2;Q3THH8;Q3TET0;Q3UDB1;A0A0N4SV00;A0A0N4SUI8;A0A0N4SV22	T-complex protein 1 subunit eta (TCP-1-eta) (CCT-eta)	Cct7	tr|Q8C5Q5|Q8C5Q5_MOUSE T-complex protein 1 subunit eta OS=Mus musculus OX=10090 GN=Cct7 PE=2 SV=1;tr|Q3TIJ7|Q3TIJ7_MOUSE T-complex protein 1 subunit eta OS=Mus musculus OX=10090 GN=Cct7 PE=1 SV=1;sp|P80313|TCPH_MOUSE T-complex protein 1 subunit eta OS=Mus	11	21	21	49.8	59.636	544	181.65	45.2	41.4	4255800000	1580800000	0.371446
Q8BU30;Q3UWS7;E9Q866;F6Q6R1;G8DYK7;G8DYH7;G8DYL3;G8DYK0;G8DYH0;G8DYE4	Isoleucine--tRNA ligase, cytoplasmic (EC 6.1.1.5) (Isoleucyl-tRNA synthetase) (IRS) (IleRS)	Iars1 Iars	sp|Q8BU30|SYIC_MOUSE Isoleucine--tRNA ligase, cytoplasmic OS=Mus musculus OX=10090 GN=Iars1 PE=1 SV=2	10	21	21	22.1	144.27	1262	184.2	20.8	21.2	1366900000	1134100000	0.829688
Q9JKR6;Q8VCI2;F6TRP3;A0A1L1SQ34;E0CYZ2	Hypoxia up-regulated protein 1 (GRP-170) (140 kDa Ca(2+)-binding protein) (CBP-140)	Hyou1 Grp170	sp|Q9JKR6|HYOU1_MOUSE Hypoxia up-regulated protein 1 OS=Mus musculus OX=10090 GN=Hyou1 PE=1 SV=1;tr|Q8VCI2|Q8VCI2_MOUSE Hyou1 protein OS=Mus musculus OX=10090 GN=Hyou1 PE=2 SV=1	5	21	21	26.9	111.18	999	150.52	6.9	26.9	61257000	1113800000	18.1824
A0A1S6GWG6;P62814;B0LAC8;Q99KA3;Q6P6I3;Q91YH6;Q8C3L6;A0A0U1RNU9	Vacuolar proton pump subunit B (V-ATPase subunit B) (Vacuolar proton pump subunit B)	Atp6v1b2	tr|A0A1S6GWG6|A0A1S6GWG6_MOUSE Vacuolar proton pump subunit B OS=Mus musculus OX=10090 GN=Atp6v1b2 PE=2 SV=1;sp|P62814|VATB2_MOUSE V-type proton ATPase subunit B, brain isoform OS=Mus musculus OX=10090 GN=Atp6v1b2 PE=1 SV=1	8	20	20	50.9	59.278	540	170.69	41.3	50.9	570600000	4473600000	7.84017
Q543F1;Q3U5Q3;Q3TMY8;A2AH85;Q6A0E3;O08810;G3UZ34;Q7TMX4;G3UXK8	116 kDa U5 small nuclear ribonucleoprotein component (U5 snRNP-specific protein, 116 kDa)	Eftud2	tr|Q543F1|Q543F1_MOUSE 116 kDa U5 small nuclear ribonucleoprotein component OS=Mus musculus OX=10090 GN=Eftud2 PE=1 SV=1;tr|Q3U5Q3|Q3U5Q3_MOUSE 116 kDa U5 small nuclear ribonucleoprotein component OS=Mus musculus OX=10090 GN=Eftud2 PE=2 SV=1;tr|Q3TMY8|Q3TM	9	21	20	29.2	109.36	971	161.64	21	26.7	447270000	1087800000	2.43209
P09411;S4R2M7;P09041;B0LAA9	Phosphoglycerate kinase 1 (EC 2.7.2.3)	Pgk1 Pgk-1	sp|P09411|PGK1_MOUSE Phosphoglycerate kinase 1 OS=Mus musculus OX=10090 GN=Pgk1 PE=1 SV=4;tr|S4R2M7|S4R2M7_MOUSE Phosphoglycerate kinase OS=Mus musculus OX=10090 GN=Pgk1 PE=1 SV=1	4	20	20	62.1	44.55	417	254.8	62.1	54.9	5660900000	1586900000	0.280326
Q9DC41;Q3U9G2;P20029;Q3TWF2;Q3TKF8;Q3TI47;Q3U7T8;Q3U6V3;Q3UEM8;Q3TUS2	78 kDa glucose-regulated protein (Binding-immunoglobulin protein) (Heat shock protein 70 family protein 5) (Heat shock protein family A member 5) (Immunoglobulin heavy chain-binding protein)	Hspa5	tr|Q9DC41|Q9DC41_MOUSE 78 kDa glucose-regulated protein OS=Mus musculus OX=10090 GN=Hspa5 PE=2 SV=1;tr|Q3U9G2|Q3U9G2_MOUSE 78 kDa glucose-regulated protein OS=Mus musculus OX=10090 GN=Hspa5 PE=2 SV=1;sp|P20029|BIP_MOUSE Endoplasmic reticulum chaperone BiP	10	22	20	42.4	72.422	655	230.28	27	42.4	369980000	4336000000	11.7196
Q3TFE8;Q7TSZ6;P70168;Q3UHW8	Importin N-terminal domain-containing protein	Kpnb1	tr|Q3TFE8|Q3TFE8_MOUSE Importin N-terminal domain-containing protein OS=Mus musculus OX=10090 GN=Kpnb1 PE=2 SV=1;tr|Q7TSZ6|Q7TSZ6_MOUSE Karyopherin (Importin) beta 1 OS=Mus musculus OX=10090 GN=Kpnb1 PE=2 SV=1;sp|P70168|IMB1_MOUSE Importin subunit beta-1 O	4	20	20	29.8	97.112	875	208.73	29.8	28.8	2583900000	1419100000	0.549209
Q564F4;Q3TII0;P80315;G5E839;Q3UJZ8;G3UYW5;G3UXF3;G3UXG2	T-complex protein 1 subunit delta	Cct4	tr|Q564F4|Q564F4_MOUSE T-complex protein 1 subunit delta OS=Mus musculus OX=10090 GN=Cct4 PE=1 SV=1;tr|Q3TII0|Q3TII0_MOUSE T-complex protein 1 subunit delta OS=Mus musculus OX=10090 GN=Cct4 PE=2 SV=1;sp|P80315|TCPD_MOUSE T-complex protein 1 subunit delta O	8	20	20	49.4	58.066	539	233.7	49.4	46.2	4196600000	1595100000	0.380093
Q8BK18;Q3TMC5;Q3TF87;Q922B2;Q3UJQ3;Q8BJY7	Aspartate--tRNA ligase, cytoplasmic (EC 6.1.1.12) (Aspartyl-tRNA synthetase)	Dars	tr|Q8BK18|Q8BK18_MOUSE Aspartate--tRNA ligase, cytoplasmic OS=Mus musculus OX=10090 GN=Dars PE=2 SV=1;tr|Q3TMC5|Q3TMC5_MOUSE Aspartate--tRNA ligase, cytoplasmic OS=Mus musculus OX=10090 GN=Dars PE=2 SV=1;tr|Q3TF87|Q3TF87_MOUSE Aspartate--tRNA ligase, cytop	6	20	20	44.3	57.147	501	187.51	44.3	39.3	2578000000	2119800000	0.822265
Q8C196;Q561M8	Carbamoyl-phosphate synthase [ammonia], mitochondrial (EC 6.3.4.16) (Carbamoyl-phosphate synthetase I) (CPSase I)	Cps1	sp|Q8C196|CPSM_MOUSE Carbamoyl-phosphate synthase [ammonia], mitochondrial OS=Mus musculus OX=10090 GN=Cps1 PE=1 SV=2	2	21	20	18.2	164.62	1500	149.57	6.9	18.2	75297000	882860000	11.725
A0A171EBL2;E9Q555;Q69ZG7;O55132;Q8CI06	E3 ubiquitin-protein ligase RNF213	Rnf213	tr|A0A171EBL2|A0A171EBL2_MOUSE E3 ubiquitin-protein ligase RNF213 OS=Mus musculus OX=10090 GN=Rnf213 PE=1 SV=1;sp|E9Q555|RN213_MOUSE E3 ubiquitin-protein ligase RNF213 OS=Mus musculus OX=10090 GN=Rnf213 PE=1 SV=2	5	19	19	4.7	584.62	5151	143.21	3.9	3.7	166990000	214670000	1.28553
Q5DTI2;O55143;O54994;Q3V1C4	P-type Ca(2+) transporter (EC 7.2.2.10) (Fragment)	Atp2a2 mKIAA4195	tr|Q5DTI2|Q5DTI2_MOUSE P-type Ca(2+) transporter (Fragment) OS=Mus musculus OX=10090 GN=Atp2a2 PE=2 SV=1;sp|O55143|AT2A2_MOUSE Sarcoplasmic/endoplasmic reticulum calcium ATPase 2 OS=Mus musculus OX=10090 GN=Atp2a2 PE=1 SV=2;tr|O54994|O54994_MOUSE Sarcoplas	4	28	19	34.4	116.6	1061	225.99	1.2	34.4	452190	3248000000	7182.82
Q542G9;P07356;Q3UCD3;Q9CZI7;B0V2N7;B0V2N8;Q99KH3;B0V2N5	Annexin	Anxa2	tr|Q542G9|Q542G9_MOUSE Annexin OS=Mus musculus OX=10090 GN=Anxa2 PE=1 SV=1;sp|P07356|ANXA2_MOUSE Annexin A2 OS=Mus musculus OX=10090 GN=Anxa2 PE=1 SV=2;tr|Q3UCD3|Q3UCD3_MOUSE Annexin OS=Mus musculus OX=10090 GN=Anxa2 PE=2 SV=1;tr|Q9CZI7|Q9CZI7_MOUSE Annexi	8	19	19	53.4	38.676	339	224.91	53.4	53.4	2492700000	4540400000	1.82148
P09055;Q8BUD1	Integrin beta-1 (Fibronectin receptor subunit beta) (VLA-4 subunit beta) (CD antigen CD29)	Itgb1	sp|P09055|ITB1_MOUSE Integrin beta-1 OS=Mus musculus OX=10090 GN=Itgb1 PE=1 SV=1	2	19	19	27.6	88.231	798	155.19	27.6	23.1	2326800000	733730000	0.315339
P38647	Stress-70 protein, mitochondrial (75 kDa glucose-regulated protein) (GRP-75) (Heat shock 70 kDa protein 9) (Mortalin) (Peptide-binding protein 74) (PBP74) (p66 MOT)	Hspa9 Grp75 Hsp74 Hspa9a	sp|P38647|GRP75_MOUSE Stress-70 protein, mitochondrial OS=Mus musculus OX=10090 GN=Hspa9 PE=1 SV=3	1	19	19	34.8	73.46	679	165.74	24.6	33.4	379800000	2530100000	6.66166
P40142;A0A286YE28;O55021;E0CY51;Q9Z2L5	Transketolase (TK) (EC 2.2.1.1) (P68)	Tkt	sp|P40142|TKT_MOUSE Transketolase OS=Mus musculus OX=10090 GN=Tkt PE=1 SV=1;tr|A0A286YE28|A0A286YE28_MOUSE Transketolase (Fragment) OS=Mus musculus OX=10090 GN=Tkt PE=1 SV=1	5	19	19	42.7	67.63	623	154.95	42.7	38	3008500000	1149800000	0.382184
P46471;Q3UIH5;Q8BVQ9;Q3U5V3	26S proteasome regulatory subunit 7 (26S proteasome AAA-ATPase subunit RPT1) (Proteasome 26S subunit ATPase 2) (Protein MSS1)	Psmc2 Mss1	sp|P46471|PRS7_MOUSE 26S proteasome regulatory subunit 7 OS=Mus musculus OX=10090 GN=Psmc2 PE=1 SV=5;tr|Q3UIH5|Q3UIH5_MOUSE 26S proteasome AAA-ATPase subunit RPT1 OS=Mus musculus OX=10090 GN=Psmc2 PE=2 SV=1;tr|Q8BVQ9|Q8BVQ9_MOUSE 26S proteasome AAA-ATPase	4	19	19	52.4	48.647	433	170.22	52.4	46	1535300000	717240000	0.467166
Q3TV20;Q61024;Q3TIA9;D3Z0C2;D3YYR0;D3Z028	Asparagine synthetase [glutamine-hydrolyzing] (EC 6.3.5.4) (Glutamine-dependent asparagine synthetase)	Asns	tr|Q3TV20|Q3TV20_MOUSE Asparagine synthetase [glutamine-hydrolyzing] OS=Mus musculus OX=10090 GN=Asns PE=2 SV=1;sp|Q61024|ASNS_MOUSE Asparagine synthetase [glutamine-hydrolyzing] OS=Mus musculus OX=10090 GN=Asns PE=1 SV=3;tr|Q3TIA9|Q3TIA9_MOUSE Asparagine	6	19	19	47.8	64.286	561	156.09	47.8	47.8	2559200000	1414800000	0.552829
Q3TXS7;Q8CGI9;Q5HZG6;Q8BU34;Q05CG9;Q8CGG2;A0JLU3;J3QN38;D6RGR5	26S proteasome non-ATPase regulatory subunit 1 (26S proteasome regulatory subunit RPN2) (26S proteasome regulatory subunit S1)	Psmd1	sp|Q3TXS7|PSMD1_MOUSE 26S proteasome non-ATPase regulatory subunit 1 OS=Mus musculus OX=10090 GN=Psmd1 PE=1 SV=1;tr|Q8CGI9|Q8CGI9_MOUSE 26S proteasome non-ATPase regulatory subunit 1 (Fragment) OS=Mus musculus OX=10090 GN=Psmd1 PE=2 SV=1;tr|Q5HZG6|Q5HZG6_M	9	19	19	27.4	105.73	953	189.35	24.8	23.3	1385100000	548150000	0.395748
Q7TSZ3;Q8BMJ2;Q6ZPT2;Q99JK2;A0A494BBF9;Q9CQM4;A0A494BA98;A0A494BA30	Leucyl-tRNA synthetase (EC 6.1.1.4)	Lars	tr|Q7TSZ3|Q7TSZ3_MOUSE Leucyl-tRNA synthetase OS=Mus musculus OX=10090 GN=Lars PE=2 SV=1;sp|Q8BMJ2|SYLC_MOUSE Leucine--tRNA ligase, cytoplasmic OS=Mus musculus OX=10090 GN=Lars1 PE=1 SV=2;tr|Q6ZPT2|Q6ZPT2_MOUSE Leucyl-tRNA synthetase (Fragment) OS=Mus musc	8	19	19	24.3	134.19	1178	138.56	24.3	21	933760000	927840000	0.99366
Q8R1B4;Q66JU1;Q3TL08;M0QWV3;Q8BVX3;P97398;Q9CV26;Q9CSD3;A0A0U1RPR0	Eukaryotic translation initiation factor 3 subunit C (eIF3c) (Eukaryotic translation initiation factor 3 subunit 8) (eIF3 p110)	Eif3c Eif3s8	sp|Q8R1B4|EIF3C_MOUSE Eukaryotic translation initiation factor 3 subunit C OS=Mus musculus OX=10090 GN=Eif3c PE=1 SV=1;tr|Q66JU1|Q66JU1_MOUSE Eif3c protein (Fragment) OS=Mus musculus OX=10090 GN=Eif3c PE=2 SV=1	9	19	19	24.7	105.53	911	149.59	20.4	18.9	1524300000	644580000	0.42287
A0A087WPL5;E9QNN1;O70133;Q3UR42;A0A0R4J2C3;Q3TF92;Q3TEB2;Q05BR6	DEAH box protein 9 (EC 3.6.4.13) (Nuclear DNA helicase II)	Dhx9	tr|A0A087WPL5|A0A087WPL5_MOUSE DEAH box protein 9 OS=Mus musculus OX=10090 GN=Dhx9 PE=1 SV=1;tr|E9QNN1|E9QNN1_MOUSE DEAH box protein 9 OS=Mus musculus OX=10090 GN=Dhx9 PE=1 SV=1;sp|O70133|DHX9_MOUSE ATP-dependent RNA helicase A OS=Mus musculus OX=10090 GN=	8	18	18	15	149.62	1383	154.13	14.5	13.6	1067400000	1489500000	1.39545
B2RSV4;Q921M3	Splicing factor 3b, subunit 3	Sf3b3	tr|B2RSV4|B2RSV4_MOUSE Splicing factor 3b, subunit 3 OS=Mus musculus OX=10090 GN=Sf3b3 PE=2 SV=1;sp|Q921M3|SF3B3_MOUSE Splicing factor 3B subunit 3 OS=Mus musculus OX=10090 GN=Sf3b3 PE=1 SV=1	2	18	18	16.1	135.55	1217	135.63	15	14.6	577930000	835210000	1.44518
B2RUR3;P06795;P21447;Q3UMH0;P21440;A0A0G2JF49;A0A0G2JDM4;Q9QX25;Q9JL39;F6SGP4	ATP-binding cassette, sub-family B (MDR/TAP), member 1B	Abcb1b	tr|B2RUR3|B2RUR3_MOUSE ATP-binding cassette, sub-family B (MDR/TAP), member 1B OS=Mus musculus OX=10090 GN=Abcb1b PE=1 SV=1;sp|P06795|MDR1B_MOUSE ATP-dependent translocase ABCB1 OS=Mus musculus OX=10090 GN=Abcb1b PE=1 SV=1;sp|P21447|MDR1A_MOUSE ATP-depende	10	20	18	21	140.99	1276	186.11	21	21	855100000	970310000	1.13473
E9Q5B5;O08528;E9Q9M6;Q3UE51;G3UVV4;Q6GQU1;Q3UPC4;Q3TJE3;P17710;Q3TTB4;Q91W97;D3YYR4;D3Z365	Hexokinase (EC 2.7.1.1)	Hk2	tr|E9Q5B5|E9Q5B5_MOUSE Hexokinase OS=Mus musculus OX=10090 GN=Hk2 PE=1 SV=1;sp|O08528|HXK2_MOUSE Hexokinase-2 OS=Mus musculus OX=10090 GN=Hk2 PE=1 SV=1	13	20	18	28.3	99.213	889	152.22	21.1	28.3	383160000	865160000	2.25796
Q58E64;Q3UA81;P10126;Q3UZQ3;Q3TII3;D3YZ68;D3Z3I8;P62631;Q4FZE5	Elongation factor 1-alpha	Eef1a1	tr|Q58E64|Q58E64_MOUSE Elongation factor 1-alpha OS=Mus musculus OX=10090 GN=Eef1a1 PE=1 SV=1;tr|Q3UA81|Q3UA81_MOUSE Elongation factor 1-alpha OS=Mus musculus OX=10090 GN=Eef1a1 PE=2 SV=1;sp|P10126|EF1A1_MOUSE Elongation factor 1-alpha 1 OS=Mus musculus OX	9	18	18	42.4	50.113	462	192.25	42.4	40.9	11455000000	16598000000	1.44897
P27773;F6Q404	Protein disulfide-isomerase A3 (EC 5.3.4.1) (58 kDa glucose-regulated protein) (58 kDa microsomal protein) (p58) (Disulfide isomerase ER-60) (Endoplasmic reticulum resident protein 57) (ER protein 57) (ERp57) (Endoplasmic reticulum resident protein 60) (ER protein 60) (ERp60)	Pdia3 Erp Erp60 Grp58	sp|P27773|PDIA3_MOUSE Protein disulfide-isomerase A3 OS=Mus musculus OX=10090 GN=Pdia3 PE=1 SV=2	2	18	18	42.6	56.678	505	170.69	18	42.6	100220000	2737200000	27.3119
P56480	ATP synthase subunit beta, mitochondrial (EC 7.1.2.2) (ATP synthase F1 subunit beta)	Atp5f1b Atp5b	sp|P56480|ATPB_MOUSE ATP synthase subunit beta, mitochondrial OS=Mus musculus OX=10090 GN=Atp5f1b PE=1 SV=2	1	18	18	51	56.3	529	176.78	48.8	51	764570000	5082900000	6.64805
Q52KG9;Q3TIX8;Q3TI05;P80317;Q3TW97;Q3TI62;A0A571BEL9;Q8VEI1;Q497N0;Q61390;Q8BVT1;B1AT05	Chaperonin containing Tcp1, subunit 6a (Zeta)	Cct6a	tr|Q52KG9|Q52KG9_MOUSE Chaperonin containing Tcp1, subunit 6a (Zeta) OS=Mus musculus OX=10090 GN=Cct6a PE=2 SV=1;tr|Q3TIX8|Q3TIX8_MOUSE Uncharacterized protein OS=Mus musculus OX=10090 GN=Cct6a PE=2 SV=1;tr|Q3TI05|Q3TI05_MOUSE Chaperonin containing Tcp1, s	12	18	18	39.9	58.076	531	149.83	39.9	37.1	5605300000	2605300000	0.464792
P97449;Q3UP74;Q3TB69;A0A0U1RNS3	Aminopeptidase N (AP-N) (mAPN) (EC 3.4.11.2) (Alanyl aminopeptidase) (Aminopeptidase M) (AP-M) (Membrane protein p161) (Microsomal aminopeptidase) (CD antigen CD13)	Anpep Lap-1 Lap1	sp|P97449|AMPN_MOUSE Aminopeptidase N OS=Mus musculus OX=10090 GN=Anpep PE=1 SV=4;tr|Q3UP74|Q3UP74_MOUSE Aminopeptidase OS=Mus musculus OX=10090 GN=Anpep PE=2 SV=1;tr|Q3TB69|Q3TB69_MOUSE Uncharacterized protein OS=Mus musculus OX=10090 GN=Anpep PE=2 SV=1	4	18	18	24	109.65	966	153.67	22.8	19.4	1292900000	585060000	0.452518
Q3TW40;Q3THB3;Q9D0E1;Q570Z0;A0A1S6GWJ8;B8JK33;Q3TL61;B8JK32;Q3TQ66;A0A3Q4EH91;F6W322;Q3UCL9;A0A3Q4L2X3	Uncharacterized protein	Hnrnpm Hnrpm	tr|Q3TW40|Q3TW40_MOUSE Uncharacterized protein OS=Mus musculus OX=10090 GN=Hnrnpm PE=2 SV=1;tr|Q3THB3|Q3THB3_MOUSE Uncharacterized protein OS=Mus musculus OX=10090 GN=Hnrnpm PE=1 SV=1;sp|Q9D0E1|HNRPM_MOUSE Heterogeneous nuclear ribonucleoprotein M OS=Mus m	13	18	18	31.2	73.769	690	130.87	13	31.2	183580000	2699700000	14.7059
Q3UXP2;Q3TXT7;Q9WTM5;A0A1B0GRW3;A0A1B0GSR4;A0A1B0GT54;A0A1B0GR89	RuvB-like helicase (EC 3.6.4.12)	Ruvbl2	tr|Q3UXP2|Q3UXP2_MOUSE RuvB-like helicase OS=Mus musculus OX=10090 GN=Ruvbl2 PE=2 SV=1;tr|Q3TXT7|Q3TXT7_MOUSE RuvB-like helicase OS=Mus musculus OX=10090 GN=Ruvbl2 PE=1 SV=1;sp|Q9WTM5|RUVB2_MOUSE RuvB-like 2 OS=Mus musculus OX=10090 GN=Ruvbl2 PE=1 SV=3;tr|	7	18	18	42.8	51.143	463	170.14	42.8	36.1	2098500000	1949700000	0.929092
Q99L75;Q3U2G2;Q571M2;Q61316;Q8C6R3	Heat shock 70 kDa protein 4	Hspa4	tr|Q99L75|Q99L75_MOUSE Heat shock 70 kDa protein 4 OS=Mus musculus OX=10090 GN=Hspa4 PE=2 SV=1;tr|Q3U2G2|Q3U2G2_MOUSE Heat shock 70 kDa protein 4 OS=Mus musculus OX=10090 GN=Hspa4 PE=1 SV=1;tr|Q571M2|Q571M2_MOUSE Heat shock 70 kDa protein 4 (Fragment) OS=M	5	19	18	30.2	94.08	841	158.5	30.2	24.7	1417300000	505530000	0.356685
Q3UD67;Q8BGQ7;Q6XMP4;Q3TZ32;Q6PDM7;Q8R346	Alanine--tRNA ligase (EC 6.1.1.7)	Aars AARS	tr|Q3UD67|Q3UD67_MOUSE Alanine--tRNA ligase OS=Mus musculus OX=10090 GN=Aars PE=2 SV=1;sp|Q8BGQ7|SYAC_MOUSE Alanine--tRNA ligase, cytoplasmic OS=Mus musculus OX=10090 GN=Aars1 PE=1 SV=1;tr|Q6XMP4|Q6XMP4_MOUSE Alanine--tRNA ligase OS=Mus musculus OX=10090 G	6	18	18	24.9	106.88	968	166.58	23.7	24.9	953370000	1048500000	1.09978
Q61753;F6ZSB7;Q8C5X4	D-3-phosphoglycerate dehydrogenase (3-PGDH) (EC 1.1.1.95) (A10)	Phgdh	sp|Q61753|SERA_MOUSE D-3-phosphoglycerate dehydrogenase OS=Mus musculus OX=10090 GN=Phgdh PE=1 SV=3	3	18	18	36.8	56.585	533	246.87	36.8	34	7976900000	5804900000	0.727714
Q6PDI5;A2ALV7;A2ALV6;A2ALV8;Q8C9Q5;A2ALW1;Q8C2Z1;A2ALV9	Proteasome adapter and scaffold protein ECM29 (Proteasome-associated protein ECM29 homolog)	Ecpas Ecm29 Kiaa0368	sp|Q6PDI5|ECM29_MOUSE Proteasome adapter and scaffold protein ECM29 OS=Mus musculus OX=10090 GN=Ecpas PE=1 SV=3;tr|A2ALV7|A2ALV7_MOUSE Proteasome adapter and scaffold protein ECM29 (Fragment) OS=Mus musculus OX=10090 GN=Ecpas PE=1 SV=1	8	18	18	12.9	203.7	1840	143.2	12.3	11.2	452150000	662790000	1.46586
Q9ERK4;E9Q1T9;F6ZEW4;E9QAX7;F7D1H9	Exportin-2 (Exp2) (Chromosome segregation 1-like protein) (Importin-alpha re-exporter)	Cse1l Xpo2	sp|Q9ERK4|XPO2_MOUSE Exportin-2 OS=Mus musculus OX=10090 GN=Cse1l PE=1 SV=1;tr|E9Q1T9|E9Q1T9_MOUSE Chromosome segregation 1-like protein OS=Mus musculus OX=10090 GN=Cse1l PE=1 SV=1;tr|F6ZEW4|F6ZEW4_MOUSE Exportin-2 (Fragment) OS=Mus musculus OX=10090 GN=Cs	5	18	18	23.3	110.45	971	149.67	23.3	20.9	1423400000	947940000	0.665969
A0A0R4J104;P98078;E9QL31;F6TQN9;Q3TRI2;E9PX84;Q3TRE6;Q3TN55;Q3TMQ2;Q9DCE6;E0CXT5;E0CZ53;E0CYJ2	Disabled homolog 2	Dab2	tr|A0A0R4J104|A0A0R4J104_MOUSE Disabled homolog 2 OS=Mus musculus OX=10090 GN=Dab2 PE=1 SV=1;sp|P98078|DAB2_MOUSE Disabled homolog 2 OS=Mus musculus OX=10090 GN=Dab2 PE=1 SV=2;tr|E9QL31|E9QL31_MOUSE Disabled homolog 2 OS=Mus musculus OX=10090 GN=Dab2 PE=1	13	17	17	35	82.212	766	125.76	32.4	31.7	1393200000	1151200000	0.826299
A0JNY7;F7CBP1;G3XA17;Q62448;Q3U9U9;Q3URI0;F6TW20	Eukaryotic translation initiation factor 4, gamma 2	Eif4g2	tr|A0JNY7|A0JNY7_MOUSE Eukaryotic translation initiation factor 4, gamma 2 OS=Mus musculus OX=10090 GN=Eif4g2 PE=2 SV=1;tr|F7CBP1|F7CBP1_MOUSE Eukaryotic translation initiation factor 4 gamma 2 OS=Mus musculus OX=10090 GN=Eif4g2 PE=1 SV=1;tr|G3XA17|G3XA17_	7	17	17	22.4	102.13	906	124.74	13.4	22.4	152860000	497000000	3.25134
E9PVC5;A0A0J9YUS5;E9PVC6;E9Q9E1;Q6NZJ6;Q6PD42;Q8K0J8;E9Q770;Q8R2V4;A0A0J9YVC1;A0A0J9YUC1;Q3UZD9;Q3UTK0;Q3UQI5;Q3UYM6;A0PJB5;Q6DI78;A2AMI7;Z4YKC4;A0A0R4J112;A2AMI2;A0A0N4SVL0;Q80XI3;A0A338P7C5;Q6EVH9	Eukaryotic translation initiation factor 4 gamma 1	Eif4g1	tr|E9PVC5|E9PVC5_MOUSE Eukaryotic translation initiation factor 4 gamma 1 OS=Mus musculus OX=10090 GN=Eif4g1 PE=1 SV=1;tr|A0A0J9YUS5|A0A0J9YUS5_MOUSE Eukaryotic translation initiation factor 4 gamma 1 OS=Mus musculus OX=10090 GN=Eif4g1 PE=1 SV=1;tr|E9PVC6|	25	17	17	12.7	175.46	1594	118.92	7	12.7	229150000	486460000	2.12289
E9Q7G0;A0A1B0GSW3;A0A1B0GT61;Q3TH77;Q3UNM2;F6ZQA3;Q91W16;A0A1B0GT38;A0A1B0GSH2;Q99KG8	Nuclear mitotic apparatus protein 1 (Nuclear mitotic apparatus protein) (NuMA protein)	Numa1	sp|E9Q7G0|NUMA1_MOUSE Nuclear mitotic apparatus protein 1 OS=Mus musculus OX=10090 GN=Numa1 PE=1 SV=1;tr|A0A1B0GSW3|A0A1B0GSW3_MOUSE Nuclear mitotic apparatus protein 1 (Fragment) OS=Mus musculus OX=10090 GN=Numa1 PE=1 SV=1	10	17	17	10	235.63	2094	142.83	4.5	9.5	164970000	376100000	2.27981
G5E866;Q99NB9;Q3US00;A0JLN0;Q3UIB4;Q8C839;Q8C2Y9	Splicing factor 3B subunit 1	Sf3b1	tr|G5E866|G5E866_MOUSE Splicing factor 3B subunit 1 OS=Mus musculus OX=10090 GN=Sf3b1 PE=1 SV=1;sp|Q99NB9|SF3B1_MOUSE Splicing factor 3B subunit 1 OS=Mus musculus OX=10090 GN=Sf3b1 PE=1 SV=1	7	17	17	15.9	145.83	1304	134.98	11	14.6	621490000	849820000	1.36739
Q5FWB7;P05064;A6ZI44;Q6NY00;D3YWI1;D3Z510;A0A0U1RPN8;Q9CPQ9;A6ZI46;D3YV98;A0A0U1RPT5;A6ZI47	Fructose-bisphosphate aldolase (EC 4.1.2.13)	Aldoa	tr|Q5FWB7|Q5FWB7_MOUSE Fructose-bisphosphate aldolase OS=Mus musculus OX=10090 GN=Aldoa PE=1 SV=1;sp|P05064|ALDOA_MOUSE Fructose-bisphosphate aldolase A OS=Mus musculus OX=10090 GN=Aldoa PE=1 SV=2;tr|A6ZI44|A6ZI44_MOUSE Fructose-bisphosphate aldolase OS=Mu	12	19	17	62.6	39.355	364	298.39	62.6	60.4	4202600000	2324900000	0.553205
P07742;Q6NZB3;Q05DU8;A0A1B0GSB1	Ribonucleoside-diphosphate reductase large subunit (EC 1.17.4.1) (Ribonucleoside-diphosphate reductase subunit M1) (Ribonucleotide reductase large subunit)	Rrm1	sp|P07742|RIR1_MOUSE Ribonucleoside-diphosphate reductase large subunit OS=Mus musculus OX=10090 GN=Rrm1 PE=1 SV=2;tr|Q6NZB3|Q6NZB3_MOUSE Ribonucleoside-diphosphate reductase OS=Mus musculus OX=10090 GN=Rrm1 PE=2 SV=1;tr|Q05DU8|Q05DU8_MOUSE Ribonucleoside-	4	17	17	29.5	90.209	792	157.4	29.5	27.4	1234600000	416600000	0.337437
Q3UDR2;Q3URP6;Q3UBY9;Q3TWE3;Q3TIM0;Q3THC3;Q3TF72;P09103;Q3UJA8;Q3UA23;Q3U738;Q3TGS0;Q3TT76;Q3TIQ5;E9Q8G8	Protein disulfide-isomerase (EC 5.3.4.1) (Fragment)	P4hb	tr|Q3UDR2|Q3UDR2_MOUSE Protein disulfide-isomerase (Fragment) OS=Mus musculus OX=10090 GN=P4hb PE=2 SV=1;tr|Q3URP6|Q3URP6_MOUSE Protein disulfide-isomerase OS=Mus musculus OX=10090 GN=P4hb PE=2 SV=1;tr|Q3UBY9|Q3UBY9_MOUSE Protein disulfide-isomerase OS=Mus	15	17	17	39	56.6	505	154.15	11.5	39	131330000	1244600000	9.47689
Q5FW97;P17182;Q6PHC1;Q8CF78;B0QZL1;B1ARR7;D3Z6E4;Q922A0;A0A0N4SUX5;Q545V3;Q3UJ20;P17183;A0A0N4SUI6;B1ARR6;D3YVD3;D3Z2S4;Q4FK59;P21550;A0A0N4SUW8;Q5SX61;Q5SX60;J3QPZ9;Q5SX59	2-phospho-D-glycerate hydro-lyase (EC 4.2.1.11)	EG433182 Eno1	tr|Q5FW97|Q5FW97_MOUSE 2-phospho-D-glycerate hydro-lyase OS=Mus musculus OX=10090 GN=EG433182 PE=1 SV=1;sp|P17182|ENOA_MOUSE Alpha-enolase OS=Mus musculus OX=10090 GN=Eno1 PE=1 SV=3;tr|Q6PHC1|Q6PHC1_MOUSE 2-phospho-D-glycerate hydro-lyase OS=Mus musculus O	23	17	17	58.3	47.14	434	158.02	58.3	57.6	8553900000	2945000000	0.344287
Q5SUC3;Q3TXE5;P35564	Uncharacterized protein	Canx	tr|Q5SUC3|Q5SUC3_MOUSE Uncharacterized protein OS=Mus musculus OX=10090 GN=Canx PE=1 SV=1;tr|Q3TXE5|Q3TXE5_MOUSE Uncharacterized protein OS=Mus musculus OX=10090 GN=Canx PE=2 SV=1;sp|P35564|CALX_MOUSE Calnexin OS=Mus musculus OX=10090 GN=Canx PE=1 SV=1	3	17	17	30.8	67.277	591	149.02	3.4	30.8	11248000	4225100000	375.631
Q4FZL1;Q5F2A7;Q3TFG3;P60843;Q3UXC2;Q3TGK7;Q3TLL6;Q3U8I0;Q78WR5;Q3TSJ4;Q8BTU6;Q52KC1;P10630;E9Q561;A0A338P6X5;Q99LR0	RNA helicase (EC 3.6.4.13) (Fragment)	Eif4a1	tr|Q4FZL1|Q4FZL1_MOUSE RNA helicase (Fragment) OS=Mus musculus OX=10090 GN=Eif4a1 PE=2 SV=1;tr|Q5F2A7|Q5F2A7_MOUSE RNA helicase OS=Mus musculus OX=10090 GN=Eif4a1 PE=1 SV=1;tr|Q3TFG3|Q3TFG3_MOUSE RNA helicase OS=Mus musculus OX=10090 GN=Eif4a1 PE=2 SV=1;sp	16	18	17	45.7	46.022	405	171.74	45.7	45.7	3310300000	3408900000	1.02979
P68040	Receptor of activated protein C kinase 1 (12-3) (Guanine nucleotide-binding protein subunit beta-2-like 1) (Receptor for activated C kinase) (Receptor of activated protein kinase C 1) (p205) [Cleaved into: Receptor of activated protein C kinase 1, N-terminally processed (Guanine nucleotide-binding protein subunit beta-2-like 1, N-terminally processed)]	Rack1 Gnb2-rs1 Gnb2l1	sp|P68040|RACK1_MOUSE Receptor of activated protein C kinase 1 OS=Mus musculus OX=10090 GN=Rack1 PE=1 SV=3	1	17	17	70	35.076	317	217.27	70	67.2	10779000000	3504200000	0.325095
Q5RKP4;Q8BMR3;Q91YQ5;Q3U900;Q99LY0;A0A0N4SUJ8	Dolichyl-diphosphooligosaccharide--protein glycosyltransferase subunit 1 (Fragment)	Rpn1	tr|Q5RKP4|Q5RKP4_MOUSE Dolichyl-diphosphooligosaccharide--protein glycosyltransferase subunit 1 (Fragment) OS=Mus musculus OX=10090 GN=Rpn1 PE=2 SV=1;tr|Q8BMR3|Q8BMR3_MOUSE Dolichyl-diphosphooligosaccharide--protein glycosyltransferase subunit 1 OS=Mus mus	6	17	17	30.6	68.396	607	162.38	6.4	30.6	104930000	3705000000	35.3093
Q8CIJ3;Q8JZQ9;A0A0G2JG48	Eukaryotic translation initiation factor 3 subunit B (eIF3b) (Eukaryotic translation initiation factor 3 subunit 9) (eIF-3-eta)	Eif3b EIF3B EIF3S9 Eif3s9	tr|Q8CIJ3|Q8CIJ3_MOUSE Eukaryotic translation initiation factor 3 subunit B OS=Mus musculus OX=10090 GN=Eif3b PE=2 SV=1;sp|Q8JZQ9|EIF3B_MOUSE Eukaryotic translation initiation factor 3 subunit B OS=Mus musculus OX=10090 GN=Eif3b PE=1 SV=1	3	17	17	21.8	108.98	970	134.09	21.8	18.8	995350000	594870000	0.597649
Q8QZY1;A0A2R8VH97	Eukaryotic translation initiation factor 3 subunit L (eIF3l) (66 kDa tyrosine-rich heat shock protein) (67 kDa polymerase-associated factor) (Eukaryotic translation initiation factor 3 subunit 6-interacting protein) (Eukaryotic translation initiation factor 3 subunit E-interacting protein) (HSP-66Y) (PAF67)	Eif3l Eif3eip Eif3s6ip Paf67	sp|Q8QZY1|EIF3L_MOUSE Eukaryotic translation initiation factor 3 subunit L OS=Mus musculus OX=10090 GN=Eif3l PE=1 SV=1	2	17	17	32.8	66.612	564	161.92	32.8	28	1622000000	404740000	0.249531
Q9CZD3;Q9DBT1	Glycine--tRNA ligase (EC 6.1.1.14) (Diadenosine tetraphosphate synthetase) (Ap4A synthetase) (EC 2.7.7.-) (Glycyl-tRNA synthetase 1) (GlyRS)	Gars1 Gars	sp|Q9CZD3|GARS_MOUSE Glycine--tRNA ligase OS=Mus musculus OX=10090 GN=Gars1 PE=1 SV=1	2	17	17	27.7	81.877	729	159.44	24.6	21	1713900000	486870000	0.284071
A0A498WGK2;Q8BP47;A0A494BB89;A0A494BAX5;A0A494BAW6;A0A494B927;A0A494B996;A0A494B9G0;A0A494B949	Asparagine--tRNA ligase (EC 6.1.1.22)	Nars	tr|A0A498WGK2|A0A498WGK2_MOUSE Asparagine--tRNA ligase OS=Mus musculus OX=10090 GN=Nars PE=1 SV=1;sp|Q8BP47|SYNC_MOUSE Asparagine--tRNA ligase, cytoplasmic OS=Mus musculus OX=10090 GN=NARS1 PE=1 SV=2;tr|A0A494BB89|A0A494BB89_MOUSE Asparaginyl-tRNA syntheta	9	16	16	35.1	64.208	558	173.62	34.2	33	2248500000	1099100000	0.488815
A2AN08;Z4YMA7;F6SSP6;A2VCS3;Z4YLP1	E3 ubiquitin-protein ligase UBR4 (EC 2.3.2.27) (N-recognin-4) (RING-type E3 ubiquitin transferase UBR4) (Zinc finger UBR1-type protein 1) (p600)	Ubr4 Kiaa0462 Zubr1	sp|A2AN08|UBR4_MOUSE E3 ubiquitin-protein ligase UBR4 OS=Mus musculus OX=10090 GN=Ubr4 PE=1 SV=1	5	16	16	4.4	572.28	5180	115.37	4.1	4.2	311910000	189120000	0.606329
E9PWY9;Q8C0C7;Q8BJG2;Q8BXN0;Q4FJQ2;Q3U0Y9;D6RIJ2;Q9CT72	Phenylalanine--tRNA ligase (EC 6.1.1.20)	Farsa	tr|E9PWY9|E9PWY9_MOUSE Phenylalanine--tRNA ligase OS=Mus musculus OX=10090 GN=Farsa PE=1 SV=1;sp|Q8C0C7|SYFA_MOUSE Phenylalanine--tRNA ligase alpha subunit OS=Mus musculus OX=10090 GN=Farsa PE=1 SV=1;tr|Q8BJG2|Q8BJG2_MOUSE Uncharacterized protein OS=Mus mu	8	16	16	37.9	57.47	507	178.75	37.9	25.4	921230000	363940000	0.395059
P21981;G3UXE8;Q14B91;Q14B90;Q9D7I9	Protein-glutamine gamma-glutamyltransferase 2 (EC 2.3.2.13) (Isopeptidase TGM2) (EC 3.4.-.-) (Protein-glutamine deamidase TGM2) (EC 3.5.1.44) (Protein-glutamine dopaminyltransferase TGM2) (EC 2.3.1.-) (Protein-glutamine histaminyltransferase TGM2) (EC 2.3.1.-) (Protein-glutamine noradrenalinyltransferase TGM2) (EC 2.3.1.-) (Protein-glutamine serotonyltransferase TGM2) (EC 2.3.1.-) (Tissue transgl…	Tgm2	sp|P21981|TGM2_MOUSE Protein-glutamine gamma-glutamyltransferase 2 OS=Mus musculus OX=10090 GN=Tgm2 PE=1 SV=4	5	16	16	28.3	77.06	686	167.73	28.3	16	926480000	323540000	0.349214
P26041;Q3TZQ2;Q05DU4;Q3UF33	Moesin (Membrane-organizing extension spike protein)	Msn	sp|P26041|MOES_MOUSE Moesin OS=Mus musculus OX=10090 GN=Msn PE=1 SV=3;tr|Q3TZQ2|Q3TZQ2_MOUSE FERM domain-containing protein OS=Mus musculus OX=10090 GN=Msn PE=2 SV=1;tr|Q05DU4|Q05DU4_MOUSE Msn protein (Fragment) OS=Mus musculus OX=10090 GN=Msn PE=2 SV=1	4	20	16	36.7	67.766	577	138.95	32.2	26.5	2008000000	829220000	0.412958
Q3U6F6;Q8C483;P26638;Q3U8N1;A2AFS0;A2AFS1;Q8CEH3	Seryl-tRNA synthetase (EC 6.1.1.11) (Seryl-tRNA(Ser/Sec) synthetase)	Sars Sars1	tr|Q3U6F6|Q3U6F6_MOUSE Seryl-tRNA synthetase OS=Mus musculus OX=10090 GN=Sars PE=2 SV=1;tr|Q8C483|Q8C483_MOUSE Seryl-tRNA synthetase OS=Mus musculus OX=10090 GN=Sars PE=1 SV=1;sp|P26638|SYSC_MOUSE Serine--tRNA ligase, cytoplasmic OS=Mus musculus OX=10090 G	7	16	16	37.9	58.358	512	166.68	37.9	32.4	4444900000	453870000	0.10211
Q3U1C2;P60122;Q3UJN2;D3YW60	RuvB-like helicase (EC 3.6.4.12)	Ruvbl1	tr|Q3U1C2|Q3U1C2_MOUSE RuvB-like helicase OS=Mus musculus OX=10090 GN=Ruvbl1 PE=1 SV=1;sp|P60122|RUVB1_MOUSE RuvB-like 1 OS=Mus musculus OX=10090 GN=Ruvbl1 PE=1 SV=1;tr|Q3UJN2|Q3UJN2_MOUSE RuvB-like helicase OS=Mus musculus OX=10090 GN=Ruvbl1 PE=2 SV=1	4	16	16	47.4	50.213	456	198.04	47.4	47.4	2374400000	2177900000	0.917242
Q3UHY8;Q3TJM9;Q3TIU8;P61222;Q6NXX7	Uncharacterized protein	Abce1	tr|Q3UHY8|Q3UHY8_MOUSE Uncharacterized protein OS=Mus musculus OX=10090 GN=Abce1 PE=1 SV=1;tr|Q3TJM9|Q3TJM9_MOUSE Uncharacterized protein OS=Mus musculus OX=10090 GN=Abce1 PE=2 SV=1;tr|Q3TIU8|Q3TIU8_MOUSE Uncharacterized protein OS=Mus musculus OX=10090 GN	5	16	16	34.9	67.314	599	173.84	33.4	33.6	2395400000	1108200000	0.462637
P63038;D3Z7J9;D3Z2F2	60 kDa heat shock protein, mitochondrial (EC 5.6.1.7) (60 kDa chaperonin) (Chaperonin 60) (CPN60) (HSP-65) (Heat shock protein 60) (HSP-60) (Hsp60) (Mitochondrial matrix protein P1)	Hspd1 Hsp60	sp|P63038|CH60_MOUSE 60 kDa heat shock protein, mitochondrial OS=Mus musculus OX=10090 GN=Hspd1 PE=1 SV=1	3	16	16	37.5	60.955	573	136.48	20.6	37.5	479770000	3106900000	6.47581
Q3TQE0;Q3TBG9;Q3TRM8;Q08EC2;E9Q8S8;Q3TVQ4;Q149C8;Q3TCB2;E9Q3Z4;D6RFA3;D3Z2E4	Hexokinase (EC 2.7.1.1)	Hk3	tr|Q3TQE0|Q3TQE0_MOUSE Hexokinase OS=Mus musculus OX=10090 GN=Hk3 PE=2 SV=1;tr|Q3TBG9|Q3TBG9_MOUSE Hexokinase OS=Mus musculus OX=10090 GN=Hk3 PE=2 SV=1;sp|Q3TRM8|HXK3_MOUSE Hexokinase-3 OS=Mus musculus OX=10090 GN=Hk3 PE=1 SV=2;tr|Q08EC2|Q08EC2_MOUSE Hexok	11	18	16	27.9	100.07	922	167.01	26.2	26.4	812310000	835160000	1.02813
Q80ZZ0;Q3TUW9;Q8K1X5;Q9WVK4;Q3TGS1;Q3TIT3;Q3TCK3;Q3T9A1;Q9QXY6;Q8R0V6;Q8BH64	EH-domain containing 1	Ehd1	tr|Q80ZZ0|Q80ZZ0_MOUSE EH-domain containing 1 OS=Mus musculus OX=10090 GN=Ehd1 PE=1 SV=2;tr|Q3TUW9|Q3TUW9_MOUSE Uncharacterized protein OS=Mus musculus OX=10090 GN=Ehd1 PE=2 SV=1;tr|Q8K1X5|Q8K1X5_MOUSE EH-domain containing 1 (Fragment) OS=Mus musculus OX=1	11	17	16	39.1	60.602	534	146.44	39.1	36.7	1597100000	907420000	0.568167
Q3U868;Q921K2;Q3TX36;Q3TM68;Q3TIV3;Q3UJ03;Q3TF18;P11103;Q3UX06;A0A0A6YX03	Poly [ADP-ribose] polymerase (PARP) (EC 2.4.2.-) (Fragment)	Parp1	tr|Q3U868|Q3U868_MOUSE Poly [ADP-ribose] polymerase (Fragment) OS=Mus musculus OX=10090 GN=Parp1 PE=2 SV=1;tr|Q921K2|Q921K2_MOUSE Poly [ADP-ribose] polymerase OS=Mus musculus OX=10090 GN=Parp1 PE=1 SV=1;tr|Q3TX36|Q3TX36_MOUSE Poly [ADP-ribose] polymerase O	10	16	16	20.6	107.91	973	120.1	12.5	20.6	145500000	759580000	5.22048
Q3UUX9;Q3UC72;Q3UPA3;Q61598;Q3TIY6;Q9CZ18;A0A1Y7VL99;A0A1Y7VLG4;P50396;D6RI86	Rab GDP dissociation inhibitor	Gdi2	tr|Q3UUX9|Q3UUX9_MOUSE Rab GDP dissociation inhibitor OS=Mus musculus OX=10090 GN=Gdi2 PE=2 SV=1;tr|Q3UC72|Q3UC72_MOUSE Rab GDP dissociation inhibitor (Fragment) OS=Mus musculus OX=10090 GN=Gdi2 PE=2 SV=1;tr|Q3UPA3|Q3UPA3_MOUSE Rab GDP dissociation inhibit	10	16	16	34.6	50.507	445	139.42	34.6	24.3	781160000	358660000	0.459138
Q5BKQ9;Q3UWW9;Q8BG32;Q7TMI0;Q497E8;Q8BK73;Q3THG2;Q8C0Z6;Q8K2N7;G3UYH2;G3UYI4;G3UYL3;G3UWW7;G3UXL5;G3UYL8;G3UX15;G3UX67;G3UWV7;G3UZ28;G3UZ33	Proteasome (Prosome, macropain) 26S subunit, non-ATPase, 11	Psmd11	tr|Q5BKQ9|Q5BKQ9_MOUSE Proteasome (Prosome, macropain) 26S subunit, non-ATPase, 11 OS=Mus musculus OX=10090 GN=Psmd11 PE=1 SV=1;tr|Q3UWW9|Q3UWW9_MOUSE PCI domain-containing protein OS=Mus musculus OX=10090 GN=Psmd11 PE=2 SV=1;sp|Q8BG32|PSD11_MOUSE 26S prot	20	16	16	44.8	47.436	422	137.76	44.8	37	1690400000	964080000	0.570327
Q4FZK2;Q9D8N0;Q8R1N8	Elongation factor 1-gamma (eEF-1B gamma)	Eef1g	tr|Q4FZK2|Q4FZK2_MOUSE Elongation factor 1-gamma OS=Mus musculus OX=10090 GN=Eef1g PE=1 SV=1;sp|Q9D8N0|EF1G_MOUSE Elongation factor 1-gamma OS=Mus musculus OX=10090 GN=Eef1g PE=1 SV=3;tr|Q8R1N8|Q8R1N8_MOUSE Eef1g protein OS=Mus musculus OX=10090 GN=Eef1g P	3	16	16	38	50.06	437	129.87	38	28.8	3231300000	1115200000	0.345124
Q53WR6;Q61543;F8WHM5;F6RSH1;E9PWD8;Q8BQH1	Golgi apparatus protein 1	Glg1 esl-1	tr|Q53WR6|Q53WR6_MOUSE Golgi apparatus protein 1 OS=Mus musculus OX=10090 GN=Glg1 PE=1 SV=1;sp|Q61543|GSLG1_MOUSE Golgi apparatus protein 1 OS=Mus musculus OX=10090 GN=Glg1 PE=1 SV=1;tr|F8WHM5|F8WHM5_MOUSE Golgi apparatus protein 1 (Fragment) OS=Mus muscul	6	16	16	16.6	133.73	1175	128.8	4.4	16.6	65146000	1396500000	21.4365
Q8C2E1;Q76MZ3;Q7TMX2;G3UWL2;G3UXQ1;H3BK50	Uncharacterized protein	Ppp2r1a	tr|Q8C2E1|Q8C2E1_MOUSE Uncharacterized protein OS=Mus musculus OX=10090 GN=Ppp2r1a PE=2 SV=1;sp|Q76MZ3|2AAA_MOUSE Serine/threonine-protein phosphatase 2A 65 kDa regulatory subunit A alpha isoform OS=Mus musculus OX=10090 GN=Ppp2r1a PE=1 SV=3;tr|Q7TMX2|Q7TM	6	18	16	40.7	65.209	589	145.12	40.7	40.7	1835100000	634440000	0.345725
Q9CWJ9;B0LAC5	Bifunctional purine biosynthesis protein ATIC (AICAR transformylase/inosine monophosphate cyclohydrolase) (ATIC) [Includes: Phosphoribosylaminoimidazolecarboxamide formyltransferase (EC 2.1.2.3) (5-aminoimidazole-4-carboxamide ribonucleotide formyltransferase) (AICAR formyltransferase) (AICAR transformylase); IMP cyclohydrolase (EC 3.5.4.10) (IMP synthase) (Inosinicase)]	Atic Purh	sp|Q9CWJ9|PUR9_MOUSE Bifunctional purine biosynthesis protein ATIC OS=Mus musculus OX=10090 GN=Atic PE=1 SV=2	2	16	16	38	64.217	592	171.77	38	26	1101900000	213460000	0.19372
A2AVJ7;Q99PL5;Q6ZPS0;Q8C7E8;Q3ULC0	Ribosome-binding protein 1	Rrbp1	tr|A2AVJ7|A2AVJ7_MOUSE Ribosome-binding protein 1 OS=Mus musculus OX=10090 GN=Rrbp1 PE=1 SV=1;sp|Q99PL5|RRBP1_MOUSE Ribosome-binding protein 1 OS=Mus musculus OX=10090 GN=Rrbp1 PE=1 SV=2;tr|Q6ZPS0|Q6ZPS0_MOUSE MKIAA1398 protein (Fragment) OS=Mus musculus O	5	15	15	12.8	158.39	1464	114.96	1.4	12.8	33549000	529150000	15.7725
E9PYI8;Q9JMA1;Q80UN0;Q3TC32	Ubiquitin carboxyl-terminal hydrolase (EC 3.4.19.12)	Usp14	tr|E9PYI8|E9PYI8_MOUSE Ubiquitin carboxyl-terminal hydrolase OS=Mus musculus OX=10090 GN=Usp14 PE=1 SV=1;sp|Q9JMA1|UBP14_MOUSE Ubiquitin carboxyl-terminal hydrolase 14 OS=Mus musculus OX=10090 GN=Usp14 PE=1 SV=3;tr|Q80UN0|Q80UN0_MOUSE Ubiquitin carboxyl-te	4	15	15	39.7	52.318	458	146.15	39.7	36.9	597730000	503630000	0.842571
P17426;A0A140LIG7;A0A140LHA6	AP-2 complex subunit alpha-1 (100 kDa coated vesicle protein A) (Adaptor protein complex AP-2 subunit alpha-1) (Adaptor-related protein complex 2 subunit alpha-1) (Alpha-adaptin A) (Alpha1-adaptin) (Clathrin assembly protein complex 2 alpha-A large chain) (Plasma membrane adaptor HA2/AP2 adaptin alpha A subunit)	Ap2a1 Adtaa Clapa1	sp|P17426|AP2A1_MOUSE AP-2 complex subunit alpha-1 OS=Mus musculus OX=10090 GN=Ap2a1 PE=1 SV=1	3	18	15	22.8	107.66	977	125.3	19.7	18.7	715230000	523970000	0.73259
Q3UAT9;Q3U9N8;P24547;Q3UPJ2;A0A0A6YXS4;A0A0A6YY72;O89058	Inosine-5'-monophosphate dehydrogenase (IMP dehydrogenase) (IMPD) (IMPDH) (EC 1.1.1.205)	Impdh2 IMPDH	tr|Q3UAT9|Q3UAT9_MOUSE Inosine-5-monophosphate dehydrogenase OS=Mus musculus OX=10090 GN=Impdh2 PE=1 SV=1;tr|Q3U9N8|Q3U9N8_MOUSE Inosine-5-monophosphate dehydrogenase OS=Mus musculus OX=10090 GN=Impdh2 PE=2 SV=1;sp|P24547|IMDH2_MOUSE Inosine-5-monophosp	7	16	15	34.4	55.814	514	175.12	34.4	34.4	909980000	2263400000	2.48731
Q8BN32;Q3U8U8;P29341;Q99KL3;Q9D4E6;Q9DBE3;Q792Y0;Q62029;A0A2I3BR37;Q3V2M1;B2RXY9;A2A5N3;Q05DT1;F6ZAX1;Q921B8;Q8C7D3	Polyadenylate-binding protein (PABP)	Pabpc1	tr|Q8BN32|Q8BN32_MOUSE Polyadenylate-binding protein OS=Mus musculus OX=10090 GN=Pabpc1 PE=2 SV=1;tr|Q3U8U8|Q3U8U8_MOUSE Polyadenylate-binding protein OS=Mus musculus OX=10090 GN=Pabpc1 PE=2 SV=1;sp|P29341|PABP1_MOUSE Polyadenylate-binding protein 1 OS=Mus	16	20	15	33.3	70.669	636	179.19	33.3	26.1	2862900000	1820700000	0.635964
Q3UVJ2;Q3U0U5;P40124;Q3TC53;Q3UNQ0;B1ARS0;D3YTR7;Q8BKZ3;A0A286YCS6;Q9CYT6	Adenylyl cyclase-associated protein	Cap1	tr|Q3UVJ2|Q3UVJ2_MOUSE Adenylyl cyclase-associated protein OS=Mus musculus OX=10090 GN=Cap1 PE=2 SV=1;tr|Q3U0U5|Q3U0U5_MOUSE Adenylyl cyclase-associated protein OS=Mus musculus OX=10090 GN=Cap1 PE=2 SV=1;sp|P40124|CAP1_MOUSE Adenylyl cyclase-associated pro	10	15	15	41.8	51.55	474	119.05	41.8	37.1	1235600000	513630000	0.415693
Q05BN2;Q3UMW2;Q3TGU7;P50580	Pa2g4 protein (Fragment)	Pa2g4 38kDa Ebp1	tr|Q05BN2|Q05BN2_MOUSE Pa2g4 protein (Fragment) OS=Mus musculus OX=10090 GN=Pa2g4 PE=2 SV=1;tr|Q3UMW2|Q3UMW2_MOUSE Peptidase_M24 domain-containing protein OS=Mus musculus OX=10090 GN=Pa2g4 PE=2 SV=1;tr|Q3TGU7|Q3TGU7_MOUSE Peptidase_M24 domain-containing pr	4	15	15	43.5	41.508	372	99.512	36.3	38.7	1242400000	864370000	0.695726
Q3UK39;Q3UJN1;P97310;A0A0N4SVY2	DNA replication licensing factor MCM2 (EC 3.6.4.12) (Minichromosome maintenance protein 2)	Mcm2	tr|Q3UK39|Q3UK39_MOUSE DNA replication licensing factor MCM2 OS=Mus musculus OX=10090 GN=Mcm2 PE=2 SV=1;tr|Q3UJN1|Q3UJN1_MOUSE DNA replication licensing factor MCM2 OS=Mus musculus OX=10090 GN=Mcm2 PE=2 SV=1;sp|P97310|MCM2_MOUSE DNA replication licensing f	4	15	15	21.2	101.93	904	102.24	14.8	16.7	283330000	338290000	1.19398
Q3TJ01;Q99LF4	RNA-splicing ligase RtcB homolog (EC 6.5.1.8) (3'-phosphate/5'-hydroxy nucleic acid ligase)	Rtcb D10Wsu52e RTCB	tr|Q3TJ01|Q3TJ01_MOUSE RNA-splicing ligase RtcB homolog OS=Mus musculus OX=10090 GN=Rtcb PE=2 SV=1;sp|Q99LF4|RTCB_MOUSE RNA-splicing ligase RtcB homolog OS=Mus musculus OX=10090 GN=Rtcb PE=1 SV=1	2	15	15	36.2	55.253	505	113.33	36.2	30.1	1403500000	525190000	0.3742
Q3UIG8;A0A171KXD3;Q8C2D7;Q3TPF5;Q80WB1;Q80WV6;Q9JIF0;A0A140LJF4;A0A140LHF7;A0A140LJ70;A0A140LHS4;Q9CX58;A0A140LI33;Q6PAK3;A0A140LIF7;A0A140LJ68	Methyltransf_25 domain-containing protein	Prmt1 Hrmt1l2	tr|Q3UIG8|Q3UIG8_MOUSE Methyltransf_25 domain-containing protein OS=Mus musculus OX=10090 GN=Prmt1 PE=1 SV=1;tr|A0A171KXD3|A0A171KXD3_MOUSE Protein arginine N-methyltransferase 1 OS=Mus musculus OX=10090 GN=Prmt1 PE=1 SV=1;tr|Q8C2D7|Q8C2D7_MOUSE Methyltran	16	15	15	47.9	40.522	353	132.22	47.9	38.5	3161100000	381050000	0.120543
Q8K2L4;Q9CWZ5;Q3ULC7;Q9JIK5;Q6PCP0	RNA helicase (EC 3.6.4.13) (Fragment)	Ddx21	tr|Q8K2L4|Q8K2L4_MOUSE RNA helicase (Fragment) OS=Mus musculus OX=10090 GN=Ddx21 PE=1 SV=1;tr|Q9CWZ5|Q9CWZ5_MOUSE RNA helicase OS=Mus musculus OX=10090 GN=Ddx21 PE=2 SV=2;tr|Q3ULC7|Q3ULC7_MOUSE RNA helicase OS=Mus musculus OX=10090 GN=Ddx21 PE=2 SV=1;sp|Q9	5	15	15	27.7	75.855	689	112.18	13.5	27.7	82797000	1300100000	15.7023
Q542D9;Q62351;Q8C872	Transferrin receptor protein 1	Tfrc	tr|Q542D9|Q542D9_MOUSE Transferrin receptor protein 1 OS=Mus musculus OX=10090 GN=Tfrc PE=1 SV=1;sp|Q62351|TFR1_MOUSE Transferrin receptor protein 1 OS=Mus musculus OX=10090 GN=Tfrc PE=1 SV=1;tr|Q8C872|Q8C872_MOUSE Transferrin receptor protein 1 OS=Mus mus	3	15	15	22.4	85.73	763	108.97	22.4	22.4	943670000	1047900000	1.11045
Q5EBP9;Q62318;Q3UDN8	Tripartite motif-containing 28	Trim28	tr|Q5EBP9|Q5EBP9_MOUSE Tripartite motif-containing 28 OS=Mus musculus OX=10090 GN=Trim28 PE=2 SV=1;sp|Q62318|TIF1B_MOUSE Transcription intermediary factor 1-beta OS=Mus musculus OX=10090 GN=Trim28 PE=1 SV=3;tr|Q3UDN8|Q3UDN8_MOUSE Uncharacterized protein (F	3	15	15	29.6	88.846	834	126.78	13.5	26.6	199120000	1012900000	5.08688
Q8BJ71;Q3TFC8;A0A1D5RLQ0	Nuclear pore complex protein Nup93 (93 kDa nucleoporin) (CBP-interacting protein 4) (Nucleoporin Nup93)	Nup93 Cip4 Kiaa0095	sp|Q8BJ71|NUP93_MOUSE Nuclear pore complex protein Nup93 OS=Mus musculus OX=10090 GN=Nup93 PE=1 SV=1;tr|Q3TFC8|Q3TFC8_MOUSE Nuclear pore complex protein Nup93 (Fragment) OS=Mus musculus OX=10090 GN=Nup93 PE=2 SV=1;tr|A0A1D5RLQ0|A0A1D5RLQ0_MOUSE Nuclear por	3	15	15	24.2	93.28	819	118.68	14.9	22.8	212630000	464310000	2.18365
Q8K1K2;A0A1S6GWH1;P62196;Q99KR1	26S proteasome regulatory subunit 8 (Psmc5 protein)	Psmc5	tr|Q8K1K2|Q8K1K2_MOUSE 26S proteasome regulatory subunit 8 OS=Mus musculus OX=10090 GN=Psmc5 PE=1 SV=1;tr|A0A1S6GWH1|A0A1S6GWH1_MOUSE AAA domain-containing protein OS=Mus musculus OX=10090 GN=Psmc5 PE=2 SV=1;sp|P62196|PRS8_MOUSE 26S proteasome regulatory s	4	14	14	50.6	38.751	348	204.38	50.6	44.5	1076400000	524920000	0.487663
Q9EQ66;A2AL85;Q8BSY0;Q8CBM2;Q8BQK0;A2AL83;A2AL79;Q8CH79;A2AL78;Q9EQ67;Q91WG6;Q3TU40;Q9EQ65;A2AL81;A2AL71;Q9EQ63;Q9EQ62;A2AL77;Q9CR06;Q9D7J8;Q920F7;A2AL74;Q920F8;A2AL76;Q920F9;A2AL75	Aspartly beta-hydroxylase	ASPH	tr|Q9EQ66|Q9EQ66_MOUSE Aspartly beta-hydroxylase OS=Mus musculus OX=10090 GN=ASPH PE=3 SV=1;tr|A2AL85|A2AL85_MOUSE Aspartyl/asparaginyl beta-hydroxylase OS=Mus musculus OX=10090 GN=Asph PE=1 SV=1;sp|Q8BSY0|ASPH_MOUSE Aspartyl/asparaginyl beta-hydroxylase O	26	14	14	27.9	77.319	689	122.76	3	27.9	56056000	1135100000	20.2494
G5E829;Q8K314;F7AAP4;D1FNM8;H2BL43;E9Q828;Q6Q477;D1FNM9;Q3TC38;Q3TDJ2;Q05CJ5;A0A1W2P7C7;Q3UHH0;Q3UHJ3;F8WHB1;D5L240;Q9R0K7;A0A1W2P867;Q3UPA8;A0A1W2P7R3;Q3TSK3;A0A1W2P772;Q6PG79;A0A1W2P6X7;A0A1W2P882	Plasma membrane calcium-transporting ATPase 1 (EC 7.2.2.10) (Plasma membrane calcium ATPase isoform 1) (PMCA1) (Plasma membrane calcium pump isoform 1)	Atp2b1	sp|G5E829|AT2B1_MOUSE Plasma membrane calcium-transporting ATPase 1 OS=Mus musculus OX=10090 GN=Atp2b1 PE=1 SV=1;tr|Q8K314|Q8K314_MOUSE Atp2b1 protein (Fragment) OS=Mus musculus OX=10090 GN=Atp2b1 PE=2 SV=1	25	20	14	22.2	134.75	1220	180.05	20.3	20.8	1195500000	1317600000	1.10213
Q3TN39;P10852;Q8BTJ9;Q60849;A0A0U1RP98;Q3U144;A0A0U1RPL8;A0A0U1RPK4;A0A0U1RPG5;A0A0U1RP32;Q3TIP1;A0A0U1RPQ7	Aamy domain-containing protein	Slc3a2	tr|Q3TN39|Q3TN39_MOUSE Aamy domain-containing protein OS=Mus musculus OX=10090 GN=Slc3a2 PE=2 SV=1;sp|P10852|4F2_MOUSE 4F2 cell-surface antigen heavy chain OS=Mus musculus OX=10090 GN=Slc3a2 PE=1 SV=1;tr|Q8BTJ9|Q8BTJ9_MOUSE Aamy domain-containing protein O	12	14	14	28.3	58.327	526	173.65	26.4	28.3	6766500000	4370700000	0.645932
Q8BK46;P14685;Q3ULJ5;Q3U5M8;F7B7L8	PCI domain-containing protein	Psmd3	tr|Q8BK46|Q8BK46_MOUSE PCI domain-containing protein OS=Mus musculus OX=10090 GN=Psmd3 PE=2 SV=1;sp|P14685|PSMD3_MOUSE 26S proteasome non-ATPase regulatory subunit 3 OS=Mus musculus OX=10090 GN=Psmd3 PE=1 SV=3;tr|Q3ULJ5|Q3ULJ5_MOUSE PCI domain-containing p	5	14	14	28.5	60.722	530	153.1	28.5	27.2	1643800000	834560000	0.507702
Q5YLW3;P62908;Q9D0A2;Q9CZP6;Q3UCL7;Q3UK56;D3YV43;O89068;A0A140LI77	40S ribosomal protein S3 (EC 4.2.99.18)	Rps3	tr|Q5YLW3|Q5YLW3_MOUSE 40S ribosomal protein S3 OS=Mus musculus OX=10090 GN=Rps3 PE=1 SV=1;sp|P62908|RS3_MOUSE 40S ribosomal protein S3 OS=Mus musculus OX=10090 GN=Rps3 PE=1 SV=1;tr|Q9D0A2|Q9D0A2_MOUSE 40S ribosomal protein S3 OS=Mus musculus OX=10090 GN=R	9	14	14	64.6	26.674	243	134.34	64.6	64.6	4487900000	4191400000	0.933933
Q03265;D3Z6F5;D6RJ16;Q3U452	ATP synthase subunit alpha, mitochondrial (ATP synthase F1 subunit alpha)	Atp5f1a Atp5a1	sp|Q03265|ATPA_MOUSE ATP synthase subunit alpha, mitochondrial OS=Mus musculus OX=10090 GN=Atp5f1a PE=1 SV=1;tr|D3Z6F5|D3Z6F5_MOUSE ATP synthase subunit alpha OS=Mus musculus OX=10090 GN=Atp5a1 PE=1 SV=1	4	14	14	31.5	59.752	553	123.09	13.9	31.5	308550000	5492700000	17.8017
Q8C290;Q3ULH5;Q3TXW2;Q3TVV6;Q8VEK3;O88568;Q3TWN5;Q3TGN5;Q3TS50	Uncharacterized protein	Hnrnpu Hnrpu	tr|Q8C290|Q8C290_MOUSE Uncharacterized protein OS=Mus musculus OX=10090 GN=Hnrnpu PE=2 SV=1;tr|Q3ULH5|Q3ULH5_MOUSE Uncharacterized protein OS=Mus musculus OX=10090 GN=Hnrnpu PE=2 SV=1;tr|Q3TXW2|Q3TXW2_MOUSE Uncharacterized protein OS=Mus musculus OX=10090	9	14	14	22.1	87.977	800	147.92	13.1	22.1	580040000	4420400000	7.62085
Q3UM23;Q91VI7;A0A1B0GSG5;A0A1B0GRG4;A0A1B0GRY7	Ribonuclease inhibitor (Ribonuclease/angiogenin inhibitor 1)	Rnh1	tr|Q3UM23|Q3UM23_MOUSE Ribonuclease inhibitor OS=Mus musculus OX=10090 GN=Rnh1 PE=2 SV=1;sp|Q91VI7|RINI_MOUSE Ribonuclease inhibitor OS=Mus musculus OX=10090 GN=Rnh1 PE=1 SV=1;tr|A0A1B0GSG5|A0A1B0GSG5_MOUSE Ribonuclease inhibitor OS=Mus musculus OX=10090 G	5	14	14	43.2	49.843	456	182.76	31.1	43.2	466820000	979130000	2.09745
Q6P5F9;Q921J0;A2AKT6;Q8BYY5;F6YA11	Exportin-1 (Exp1) (Chromosome region maintenance 1 protein homolog)	Xpo1 Crm1	sp|Q6P5F9|XPO1_MOUSE Exportin-1 OS=Mus musculus OX=10090 GN=Xpo1 PE=1 SV=1	5	14	14	16.8	123.09	1071	99.451	16.8	12	791750000	305220000	0.3855
Q8BML9;D3Z158;Q3TIN2;Q8R1V9;A0A140LHZ5;A0A140LIS6;A0A140LHB3;A0A0A6YY08;A0A140LIN2;A0A140LHJ3;A0A140LJH1;A0A140LIZ4;A0A140LJH2;A0A140LID3;A0A140LJK5;A0A140LHC3;A0A140LIR0;A0A140LII8	Glutamine--tRNA ligase (EC 6.1.1.18) (Glutaminyl-tRNA synthetase) (GlnRS)	Qars1 Qars	sp|Q8BML9|SYQ_MOUSE Glutamine--tRNA ligase OS=Mus musculus OX=10090 GN=Qars1 PE=1 SV=1;tr|D3Z158|D3Z158_MOUSE Glutaminyl-tRNA synthetase OS=Mus musculus OX=10090 GN=Qars PE=1 SV=2;tr|Q3TIN2|Q3TIN2_MOUSE Glutaminyl-tRNA synthetase OS=Mus musculus OX=10090 G	18	14	14	24.8	87.676	775	98.93	21.8	20.8	496170000	449950000	0.906846
Q8C605;Q9WUA3;Q9D255;Q8C8E8;D3YUA3;F6YL81	ATP-dependent 6-phosphofructokinase (ATP-PFK) (Phosphofructokinase) (EC 2.7.1.11) (Phosphohexokinase)	Pfkp	tr|Q8C605|Q8C605_MOUSE ATP-dependent 6-phosphofructokinase OS=Mus musculus OX=10090 GN=Pfkp PE=1 SV=1;sp|Q9WUA3|PFKAP_MOUSE ATP-dependent 6-phosphofructokinase, platelet type OS=Mus musculus OX=10090 GN=Pfkp PE=1 SV=1	6	15	14	25.1	85.546	784	167.28	23.9	25.1	925000000	625750000	0.676486
Q91ZW3;Q3U0F8;Q05DE7;Q6PGB8;Q3URV3;B2RT32;F6Z6F4;Q8BS67	SWI/SNF-related matrix-associated actin-dependent regulator of chromatin subfamily A member 5 (EC 3.6.4.-) (Sucrose nonfermenting protein 2 homolog) (mSnf2h)	Smarca5 Snf2h	sp|Q91ZW3|SMCA5_MOUSE SWI/SNF-related matrix-associated actin-dependent regulator of chromatin subfamily A member 5 OS=Mus musculus OX=10090 GN=Smarca5 PE=1 SV=1	8	14	14	14.1	121.63	1051	99.764	6.6	14.1	214190000	482860000	2.25435
Q9JIF7	Coatomer subunit beta (Beta-coat protein) (Beta-COP)	Copb1 Copb	sp|Q9JIF7|COPB_MOUSE Coatomer subunit beta OS=Mus musculus OX=10090 GN=Copb1 PE=1 SV=1	1	14	14	20.9	107.06	953	109.29	18	20.9	409670000	428240000	1.04533
Q9Z1G3;Q9D9Z4;Q3TG21;A0A2I3BPD0;A0A2I3BQD9;D3Z5W3;Q99L60	V-type proton ATPase subunit C 1 (V-ATPase subunit C 1) (Vacuolar proton pump subunit C 1)	Atp6v1c1 Atp6c Atp6c1 Vatc	sp|Q9Z1G3|VATC1_MOUSE V-type proton ATPase subunit C 1 OS=Mus musculus OX=10090 GN=Atp6v1c1 PE=1 SV=4;tr|Q9D9Z4|Q9D9Z4_MOUSE V-type proton ATPase subunit C OS=Mus musculus OX=10090 GN=Atp6v1c1 PE=2 SV=1;tr|Q3TG21|Q3TG21_MOUSE V-type proton ATPase subunit C	7	14	14	40.6	43.887	382	102.98	33.8	40.6	366100000	1691800000	4.62114
Q3UIZ0;A0A0R4J0F6;Q99KY4;Q3UDE5;D6RHK5;A0A0G2JFZ0;F6SLK1;A0A0G2JGP6;A0A0G2JEW6;F7BG02	Uncharacterized protein	Gak	tr|Q3UIZ0|Q3UIZ0_MOUSE Uncharacterized protein OS=Mus musculus OX=10090 GN=Gak PE=2 SV=1;tr|A0A0R4J0F6|A0A0R4J0F6_MOUSE Cyclin-G-associated kinase OS=Mus musculus OX=10090 GN=Gak PE=1 SV=1;sp|Q99KY4|GAK_MOUSE Cyclin-G-associated kinase OS=Mus musculus OX=1	10	13	13	11.5	143.64	1305	91.616	11.5	8.7	398930000	231090000	0.579275
E9QAS4;E9QAS5;Q5DTP7;Q6PDQ2;Q99JM0;Q3U582;Q8BM83;E9PYU4;E9PYL1;A2A8L1;Q3UFM8;F6WR45;F7C528;E9Q614;B1AR17;Q8BL30;Q8K0T3;Q4QQN1;A0A5F8MQ82	DNA helicase (EC 3.6.4.12)	Chd4	tr|E9QAS4|E9QAS4_MOUSE DNA helicase OS=Mus musculus OX=10090 GN=Chd4 PE=1 SV=1;tr|E9QAS5|E9QAS5_MOUSE DNA helicase OS=Mus musculus OX=10090 GN=Chd4 PE=1 SV=1;tr|Q5DTP7|Q5DTP7_MOUSE DNA helicase (Fragment) OS=Mus musculus OX=10090 GN=Chd4 PE=2 SV=1;sp|Q6PDQ	19	13	13	8.2	216.37	1902	88.283	3.9	8.2	199340000	448340000	2.24912
P14733;Q8C553	Lamin-B1	Lmnb1	sp|P14733|LMNB1_MOUSE Lamin-B1 OS=Mus musculus OX=10090 GN=Lmnb1 PE=1 SV=3;tr|Q8C553|Q8C553_MOUSE IF rod domain-containing protein (Fragment) OS=Mus musculus OX=10090 GN=Lmnb1 PE=2 SV=1	2	14	13	26.7	66.785	588	116.15	13.3	26.7	119440000	899950000	7.53475
Q3UDG2;Q3U6U7;Q4FJZ4;P32921;E0CXX4;E0CXQ4	T1-TrpRS (EC 6.1.1.2) (T2-TrpRS) (Tryptophan--tRNA ligase, cytoplasmic) (Tryptophanyl-tRNA synthetase)	Wars	tr|Q3UDG2|Q3UDG2_MOUSE T1-TrpRS OS=Mus musculus OX=10090 GN=Wars PE=2 SV=1;tr|Q3U6U7|Q3U6U7_MOUSE T1-TrpRS OS=Mus musculus OX=10090 GN=Wars PE=2 SV=1;tr|Q4FJZ4|Q4FJZ4_MOUSE T1-TrpRS OS=Mus musculus OX=10090 GN=Wars PE=2 SV=1;sp|P32921|SYWC_MOUSE Tryptophan	6	13	13	36.6	53.625	475	115.38	36.6	11.8	734430000	35059000	0.0477363
Q8BKU2;Q569X4;Q3TUN5;P54775;Q3UBF0;A0A140LIZ5;Q3TFA5;Q3TJ97;Q52L53	26S proteasome AAA-ATPase subunit RPT3 (26S proteasome regulatory subunit 6B) (Proteasome 26S subunit ATPase 4)	Psmc4	tr|Q8BKU2|Q8BKU2_MOUSE 26S proteasome AAA-ATPase subunit RPT3 OS=Mus musculus OX=10090 GN=Psmc4 PE=2 SV=1;tr|Q569X4|Q569X4_MOUSE 26S proteasome AAA-ATPase subunit RPT3 OS=Mus musculus OX=10090 GN=Psmc4 PE=2 SV=1;tr|Q3TUN5|Q3TUN5_MOUSE 26S proteasome AAA-AT	9	13	13	41.4	47.394	418	112.71	41.4	32.3	967840000	462190000	0.477548
Q14AQ1;P62334;Q8QZS9	Proteasome (Prosome, macropain) 26S subunit, ATPase, 6	Psmc6	tr|Q14AQ1|Q14AQ1_MOUSE Proteasome (Prosome, macropain) 26S subunit, ATPase, 6 OS=Mus musculus OX=10090 GN=Psmc6 PE=1 SV=1;sp|P62334|PRS10_MOUSE 26S proteasome regulatory subunit 10B OS=Mus musculus OX=10090 GN=Psmc6 PE=1 SV=1;tr|Q8QZS9|Q8QZS9_MOUSE Psmc6 p	3	13	13	43.4	44.172	389	102.61	43.4	41.6	1071400000	668970000	0.624389
Q3UKB4;Q3TYS4;Q3TIS3;Q3TAW4;Q9D662;Q8CDS4;A2ANA0;Q3U2Q0;A2AN98;A2AN99;E9Q1S3;Q8C1E4;Q01405;A2AN97	Protein transport protein SEC23	Sec23b	tr|Q3UKB4|Q3UKB4_MOUSE Protein transport protein SEC23 OS=Mus musculus OX=10090 GN=Sec23b PE=2 SV=1;tr|Q3TYS4|Q3TYS4_MOUSE Protein transport protein SEC23 OS=Mus musculus OX=10090 GN=Sec23b PE=2 SV=1;tr|Q3TIS3|Q3TIS3_MOUSE Protein transport protein SEC23 O	14	13	13	24.6	86.402	767	172.59	24.6	21.5	549140000	264850000	0.4823
Q3TFF0;Q9QYJ0	Uncharacterized protein	Dnaja2	tr|Q3TFF0|Q3TFF0_MOUSE Uncharacterized protein OS=Mus musculus OX=10090 GN=Dnaja2 PE=2 SV=1;sp|Q9QYJ0|DNJA2_MOUSE DnaJ homolog subfamily A member 2 OS=Mus musculus OX=10090 GN=Dnaja2 PE=1 SV=1	2	13	13	33.5	45.746	412	86.969	33.5	31.6	1359000000	1009700000	0.742973
Q3TRJ1;Q3TJ43;Q9EQH3;Q3TKU6;Q3UQJ1;Q3TUV7	Vacuolar protein sorting-associated protein 35	Vps35	tr|Q3TRJ1|Q3TRJ1_MOUSE Vacuolar protein sorting-associated protein 35 OS=Mus musculus OX=10090 GN=Vps35 PE=1 SV=1;tr|Q3TJ43|Q3TJ43_MOUSE Vacuolar protein sorting-associated protein 35 OS=Mus musculus OX=10090 GN=Vps35 PE=2 SV=1;sp|Q9EQH3|VPS35_MOUSE Vacuol	6	13	13	20.7	91.712	796	108.52	20.7	19.5	575620000	351360000	0.610403
Q3U8F5;Q9D8W5;B1AT36;Q3TRH2;Q9CSW4	PCI domain-containing protein	Psmd12	tr|Q3U8F5|Q3U8F5_MOUSE PCI domain-containing protein OS=Mus musculus OX=10090 GN=Psmd12 PE=2 SV=1;sp|Q9D8W5|PSD12_MOUSE 26S proteasome non-ATPase regulatory subunit 12 OS=Mus musculus OX=10090 GN=Psmd12 PE=1 SV=4;tr|B1AT36|B1AT36_MOUSE 26S proteasome non-A	5	13	13	34.9	52.867	456	98.513	34.9	34.9	937330000	421820000	0.450023
Q3UJZ7;Q9D6Z1;Q3USZ5;A2APD7;F7CHQ7;E0CXZ0;F6USW7;F6U250;F6V095;F7CHP9	Nop domain-containing protein	Nop56 Nol5a	tr|Q3UJZ7|Q3UJZ7_MOUSE Nop domain-containing protein OS=Mus musculus OX=10090 GN=Nop56 PE=2 SV=1;sp|Q9D6Z1|NOP56_MOUSE Nucleolar protein 56 OS=Mus musculus OX=10090 GN=Nop56 PE=1 SV=2;tr|Q3USZ5|Q3USZ5_MOUSE Nop domain-containing protein (Fragment) OS=Mus m	10	13	13	29.7	64.586	580	102.54	12.1	27.9	522280000	867150000	1.66032
Q3ULS2;Q8CG48;B1AWH6;Q6IR05;Q3TT08	Structural maintenance of chromosomes protein	Smc2 Smc2l1	tr|Q3ULS2|Q3ULS2_MOUSE Structural maintenance of chromosomes protein OS=Mus musculus OX=10090 GN=Smc2 PE=2 SV=1;sp|Q8CG48|SMC2_MOUSE Structural maintenance of chromosomes protein 2 OS=Mus musculus OX=10090 GN=Smc2 PE=1 SV=2	5	13	13	13.4	139.29	1233	96.714	6.7	13.4	101640000	384670000	3.78463
Q61768;E9QAK5;Q3TY51;Q8CHF1;P28738;P33175;Q3UWI9;Q8CFE7;Q6NSS5;Q05CG8;O70402;Q3US62;Q05CD7	Kinesin-1 heavy chain (Conventional kinesin heavy chain) (Ubiquitous kinesin heavy chain) (UKHC)	Kif5b Khcs Kns1	sp|Q61768|KINH_MOUSE Kinesin-1 heavy chain OS=Mus musculus OX=10090 GN=Kif5b PE=1 SV=3	13	13	13	16.9	109.55	963	102.87	15.6	16.9	263560000	375730000	1.4256
Q6ZQ38;Q3UMI9;D3YWC5	Cullin-associated NEDD8-dissociated protein 1 (Cullin-associated and neddylation-dissociated protein 1) (p120 CAND1)	Cand1 D10Ertd516e Kiaa0829	sp|Q6ZQ38|CAND1_MOUSE Cullin-associated NEDD8-dissociated protein 1 OS=Mus musculus OX=10090 GN=Cand1 PE=1 SV=2	3	13	13	14.2	136.33	1230	108.46	14.2	8	616780000	173370000	0.281089
Q99JI4;Q8C1T2;A0A286YDW8	26S proteasome non-ATPase regulatory subunit 6 (26S proteasome regulatory subunit RPN7) (26S proteasome regulatory subunit S10) (p42A)	Psmd6	sp|Q99JI4|PSMD6_MOUSE 26S proteasome non-ATPase regulatory subunit 6 OS=Mus musculus OX=10090 GN=Psmd6 PE=1 SV=1;tr|Q8C1T2|Q8C1T2_MOUSE Uncharacterized protein OS=Mus musculus OX=10090 GN=Psmd6 PE=2 SV=1	3	13	13	30.8	45.536	389	128.36	30.8	22.1	1266100000	689790000	0.544815
Q99MR6;A0A0G2JDF8;A0A0G2JG65;A0A0G2JDF1;A0A0G2JDN3	Serrate RNA effector molecule homolog (Arsenite-resistance protein 2)	Srrt Ars2 Asr2	sp|Q99MR6|SRRT_MOUSE Serrate RNA effector molecule homolog OS=Mus musculus OX=10090 GN=Srrt PE=1 SV=1;tr|A0A0G2JDF8|A0A0G2JDF8_MOUSE Arsenite-resistance protein 2 (Fragment) OS=Mus musculus OX=10090 GN=Srrt PE=1 SV=1	5	13	13	13.7	100.45	875	86.653	9.9	10.6	215590000	227610000	1.05575
Q9CZN7	Serine hydroxymethyltransferase, mitochondrial (SHMT) (EC 2.1.2.1) (Glycine hydroxymethyltransferase) (Serine methylase)	Shmt2	sp|Q9CZN7|GLYM_MOUSE Serine hydroxymethyltransferase, mitochondrial OS=Mus musculus OX=10090 GN=Shmt2 PE=1 SV=1	1	14	13	33.3	55.758	504	116.21	30.2	30.6	708010000	1114500000	1.57413
Q9DCL9;D3Z6P1;D6RCU8	Multifunctional protein ADE2 [Includes: Phosphoribosylaminoimidazole-succinocarboxamide synthase (EC 6.3.2.6) (SAICAR synthetase); Phosphoribosylaminoimidazole carboxylase (EC 4.1.1.21) (AIR carboxylase) (AIRC)]	Paics	sp|Q9DCL9|PUR6_MOUSE Multifunctional protein ADE2 OS=Mus musculus OX=10090 GN=Paics PE=1 SV=4	3	13	13	36.2	47.006	425	119.54	36.2	36.2	810350000	819090000	1.01079
Q6PDG0;B9EJ54;A0A0J9YUD5;Q6ZQG1;Q6P9L5;Q6P9Y6;Q80VE6;Q3UFI7;E9Q880;B0LAE1;Q9D6C1	Nup205 protein (Fragment)	Nup205	tr|Q6PDG0|Q6PDG0_MOUSE Nup205 protein (Fragment) OS=Mus musculus OX=10090 GN=Nup205 PE=2 SV=1;tr|B9EJ54|B9EJ54_MOUSE Nucleoporin 205 OS=Mus musculus OX=10090 GN=Nup205 PE=1 SV=1;tr|A0A0J9YUD5|A0A0J9YUD5_MOUSE Nucleoporin 205 OS=Mus musculus OX=10090 GN=Nup	11	12	12	8	226.93	2003	86.333	7.5	7.5	181420000	301270000	1.66062
A0A1W2P7Q6;Q9CRT8;A0A1W2P7V1	Exportin-T (Exportin(tRNA)) (tRNA exportin)	Xpot	tr|A0A1W2P7Q6|A0A1W2P7Q6_MOUSE Exportin-T OS=Mus musculus OX=10090 GN=Xpot PE=1 SV=1;sp|Q9CRT8|XPOT_MOUSE Exportin-T OS=Mus musculus OX=10090 GN=Xpot PE=1 SV=3	3	12	12	15.8	109.79	962	111.77	15.8	11.6	492820000	255580000	0.518607
A0AUN0;Q4G0C0;G3X928;Q6NZC7;Q3UY74	Sec23ip protein (Fragment)	Sec23ip	tr|A0AUN0|A0AUN0_MOUSE Sec23ip protein (Fragment) OS=Mus musculus OX=10090 GN=Sec23ip PE=2 SV=1;tr|Q4G0C0|Q4G0C0_MOUSE Sec23 interacting protein OS=Mus musculus OX=10090 GN=Sec23ip PE=2 SV=1;tr|G3X928|G3X928_MOUSE SEC23-interacting protein OS=Mus musculus	5	12	12	16.5	95.116	842	91.913	16.5	13.5	634480000	481760000	0.759299
Q8BTS0;A1L333;Q5U222;Q3V0Z8;Q61656;S4R1I6;Q3UXW3;Q9CSD9;B1ARB9;B1ARC0;O35662;S4R1E3	DEAD box protein 5 (EC 3.6.4.13) (Probable ATP-dependent RNA helicase DDX5)	Ddx5	tr|Q8BTS0|Q8BTS0_MOUSE DEAD box protein 5 OS=Mus musculus OX=10090 GN=Ddx5 PE=1 SV=1;tr|A1L333|A1L333_MOUSE DEAD box protein 5 OS=Mus musculus OX=10090 GN=Ddx5 PE=2 SV=1;tr|Q5U222|Q5U222_MOUSE DEAD box protein 5 (Fragment) OS=Mus musculus OX=10090 GN=Ddx5	12	17	12	27.8	69.265	615	178.16	26.3	27.8	1454000000	4074700000	2.80241
Q61833;A2ACG7;Q3U505;Q9DBG6	Dolichyl-diphosphooligosaccharide--protein glycosyltransferase subunit 2 (Ribophorin-2)	Rpn2 MARib	tr|Q61833|Q61833_MOUSE Dolichyl-diphosphooligosaccharide--protein glycosyltransferase subunit 2 OS=Mus musculus OX=10090 GN=Rpn2 PE=2 SV=1;tr|A2ACG7|A2ACG7_MOUSE Dolichyl-diphosphooligosaccharide--protein glycosyltransferase subunit 2 OS=Mus musculus OX=10	4	12	12	30.8	66.301	607	123.33	0	30.8	0	1541100000	#DIV/0!
J3QMC5;A2ANY6;Q5U481;Q3TPE2;Q497I1;Q6IQZ8;Q8CAR9;Q6R5G2	Midasin	Mdn1	tr|J3QMC5|J3QMC5_MOUSE Midasin OS=Mus musculus OX=10090 GN=Mdn1 PE=1 SV=1;tr|A2ANY6|A2ANY6_MOUSE Midasin OS=Mus musculus OX=10090 GN=Mdn1 PE=1 SV=1	8	12	12	2.6	629.58	5582	73.469	0.3	2.5	15474000	164030000	10.6004
B2RT97;Q9WVJ2;E9Q5I9;E9Q0U1;F6ZQQ3;F6PXS6;E9PY93	26S proteasome non-ATPase regulatory subunit 13 (26S proteasome regulatory subunit RPN9) (26S proteasome regulatory subunit S11) (26S proteasome regulatory subunit p40.5)	Psmd13	tr|B2RT97|B2RT97_MOUSE 26S proteasome non-ATPase regulatory subunit 13 OS=Mus musculus OX=10090 GN=Psmd13 PE=1 SV=1;sp|Q9WVJ2|PSD13_MOUSE 26S proteasome non-ATPase regulatory subunit 13 OS=Mus musculus OX=10090 GN=Psmd13 PE=1 SV=1;tr|E9Q5I9|E9Q5I9_MOUSE 26	7	12	12	35.1	42.809	376	93.424	30.3	31.4	1156000000	737850000	0.638279
B2RUC7;Q9Z1Z2	Serine/threonine kinase receptor associated protein	Strap	tr|B2RUC7|B2RUC7_MOUSE Serine/threonine kinase receptor associated protein OS=Mus musculus OX=10090 GN=Strap PE=1 SV=1;sp|Q9Z1Z2|STRAP_MOUSE Serine-threonine kinase receptor-associated protein OS=Mus musculus OX=10090 GN=Strap PE=1 SV=2	2	12	12	45.7	38.442	350	107.59	45.7	32.9	1407200000	460080000	0.326947
E9Q368	TAR RNA-binding protein 1	Tarbp1	tr|E9Q368|E9Q368_MOUSE TAR RNA-binding protein 1 OS=Mus musculus OX=10090 GN=Tarbp1 PE=1 SV=1	1	12	12	11.2	175.69	1579	87.137	11.2	9.1	304390000	107420000	0.352903
E9QN31;Q922K7;Q99KC3;A0A0N4SW16	Probable 28S rRNA (cytosine-C(5))-methyltransferase	Nop2	tr|E9QN31|E9QN31_MOUSE Probable 28S rRNA (cytosine-C(5))-methyltransferase OS=Mus musculus OX=10090 GN=Nop2 PE=1 SV=1;sp|Q922K7|NOP2_MOUSE Probable 28S rRNA (cytosine-C(5))-methyltransferase OS=Mus musculus OX=10090 GN=Nop2 PE=1 SV=1	4	12	12	18.5	86.906	794	141	15.9	18.5	949810000	945390000	0.995346
G3UZ26;Q9CWR5;P50431;G3UYY1;G3UZZ9	Serine hydroxymethyltransferase (EC 2.1.2.1) (Fragment)	Shmt1	tr|G3UZ26|G3UZ26_MOUSE Serine hydroxymethyltransferase (Fragment) OS=Mus musculus OX=10090 GN=Shmt1 PE=1 SV=1;tr|Q9CWR5|Q9CWR5_MOUSE Serine hydroxymethyltransferase OS=Mus musculus OX=10090 GN=Shmt1 PE=2 SV=1;sp|P50431|GLYC_MOUSE Serine hydroxymethyltransf	5	13	12	41.2	48.334	439	93.133	38.7	18.7	1323200000	139850000	0.105691
O88569;B7ZP22;A0A0N4SUM2	Heterogeneous nuclear ribonucleoproteins A2/B1 (hnRNP A2/B1)	Hnrnpa2b1 Hnrpa2b1	sp|O88569|ROA2_MOUSE Heterogeneous nuclear ribonucleoproteins A2/B1 OS=Mus musculus OX=10090 GN=Hnrnpa2b1 PE=1 SV=2;tr|B7ZP22|B7ZP22_MOUSE Heterogeneous nuclear ribonucleoproteins A2/B1 OS=Mus musculus OX=10090 GN=Hnrnpa2b1 PE=2 SV=1;tr|A0A0N4SUM2|A0A0N4SU	3	12	12	40.2	37.402	353	108.02	40.2	40.2	804900000	2309800000	2.86967
Q3U9K3;Q3U232;Q3U1N0;O89053;Q3T9L1;G3UYK8;A0A0U1RPY8;D3YW57;G3UX53;D3YXM2	Coronin	Coro1a	tr|Q3U9K3|Q3U9K3_MOUSE Coronin OS=Mus musculus OX=10090 GN=Coro1a PE=2 SV=1;tr|Q3U232|Q3U232_MOUSE Coronin OS=Mus musculus OX=10090 GN=Coro1a PE=2 SV=1;tr|Q3U1N0|Q3U1N0_MOUSE Coronin OS=Mus musculus OX=10090 GN=Coro1a PE=1 SV=1;sp|O89053|COR1A_MOUSE Coroni	10	12	12	28.9	50.962	461	84.19	28.9	25.6	1158800000	620350000	0.535338
Q546G4;P07724;K7R066	Serum albumin	Alb alb Alb1	tr|Q546G4|Q546G4_MOUSE Serum albumin OS=Mus musculus OX=10090 GN=Alb PE=1 SV=1;sp|P07724|ALBU_MOUSE Albumin OS=Mus musculus OX=10090 GN=Alb PE=1 SV=3	3	12	12	26.8	68.692	608	102.68	8.4	26.8	1180500000	193240000	0.163693
Q6P1A9;Q5EBG5;Q58ET1;Q80UT7;P12970;Q8CDE3;V9GX35	60S ribosomal protein L7a	Rpl7a	tr|Q6P1A9|Q6P1A9_MOUSE 60S ribosomal protein L7a OS=Mus musculus OX=10090 GN=Rpl7a PE=2 SV=1;tr|Q5EBG5|Q5EBG5_MOUSE 60S ribosomal protein L7a OS=Mus musculus OX=10090 GN=Rpl7a PE=2 SV=1;tr|Q58ET1|Q58ET1_MOUSE 60S ribosomal protein L7a OS=Mus musculus OX=10	7	12	12	39.8	30.024	266	109.13	35.7	39.8	603850000	5757200000	9.53416
Q544B1;Q3UJW1;Q3U9J7;Q3TVM2;P47738;A0A0G2JEU1;Q3U6I3;A0A0G2JFQ0;A0A0G2JF60;D3YYF3	Aldedh domain-containing protein	Aldh2	tr|Q544B1|Q544B1_MOUSE Aldedh domain-containing protein OS=Mus musculus OX=10090 GN=Aldh2 PE=1 SV=1;tr|Q3UJW1|Q3UJW1_MOUSE Aldedh domain-containing protein OS=Mus musculus OX=10090 GN=Aldh2 PE=2 SV=1;tr|Q3U9J7|Q3U9J7_MOUSE Aldedh domain-containing protein	10	12	12	32	56.537	519	101.66	25.4	32	325740000	1146400000	3.51937
P48036;A0A0G2JGQ0	Annexin A5 (Anchorin CII) (Annexin V) (Annexin-5) (Calphobindin I) (CBP-I) (Endonexin II) (Lipocortin V) (Placental anticoagulant protein 4) (PP4) (Placental anticoagulant protein I) (PAP-I) (Thromboplastin inhibitor) (Vascular anticoagulant-alpha) (VAC-alpha)	Anxa5 Anx5	sp|P48036|ANXA5_MOUSE Annexin A5 OS=Mus musculus OX=10090 GN=Anxa5 PE=1 SV=1	2	12	12	45.8	35.752	319	118.7	35.1	42.3	932540000	1250600000	1.34107
Q4FJQ0;P51150;A0A0N4SVG9;A0A0N4SVR6	Rab7 (Rab7 protein)	Rab7	tr|Q4FJQ0|Q4FJQ0_MOUSE Rab7 OS=Mus musculus OX=10090 GN=Rab7 PE=1 SV=1;sp|P51150|RAB7A_MOUSE Ras-related protein Rab-7a OS=Mus musculus OX=10090 GN=Rab7a PE=1 SV=2	4	12	12	67.6	23.489	207	146.51	67.6	67.6	1359700000	2056400000	1.51239
Q3U4W8;P56399;D3YYA5;D3Z4K7	Ubiquitin carboxyl-terminal hydrolase (EC 3.4.19.12)	Usp5	tr|Q3U4W8|Q3U4W8_MOUSE Ubiquitin carboxyl-terminal hydrolase OS=Mus musculus OX=10090 GN=Usp5 PE=1 SV=1;sp|P56399|UBP5_MOUSE Ubiquitin carboxyl-terminal hydrolase 5 OS=Mus musculus OX=10090 GN=Usp5 PE=1 SV=1	4	12	12	20.6	93.354	835	106.51	17.5	20.6	228730000	520230000	2.27443
Q3UDF8;Q3UIJ2;Q3TML6;Q9Z0N1;A2AAW9;Q9Z0N2;Q9CRE9;Q9D791;Q3U5H6;Q6NY07;Q9CZT2	Protein-synthesizing GTPase (EC 3.6.5.3)	Eif2s3x	tr|Q3UDF8|Q3UDF8_MOUSE Protein-synthesizing GTPase OS=Mus musculus OX=10090 GN=Eif2s3x PE=2 SV=1;tr|Q3UIJ2|Q3UIJ2_MOUSE Protein-synthesizing GTPase OS=Mus musculus OX=10090 GN=Eif2s3x PE=2 SV=1;tr|Q3TML6|Q3TML6_MOUSE Protein-synthesizing GTPase OS=Mus musc	11	12	12	36.2	48.107	447	132.32	36.2	34	1288800000	943360000	0.731968
Q3TWG5;Q8R1Q8;Q3TVT4;A2VDF8;A0A1D5RMC1;A0A1D5RM94;Q6PDL0	Dynein light intermediate chain	Dync1li1 Dnclic1	tr|Q3TWG5|Q3TWG5_MOUSE Dynein light intermediate chain OS=Mus musculus OX=10090 GN=Dync1li1 PE=1 SV=1;sp|Q8R1Q8|DC1L1_MOUSE Cytoplasmic dynein 1 light intermediate chain 1 OS=Mus musculus OX=10090 GN=Dync1li1 PE=1 SV=1;tr|Q3TVT4|Q3TVT4_MOUSE Dynein light i	7	12	12	33.5	56.614	523	96.418	33.5	33.5	479820000	531300000	1.10729
Q3V1M8;Q3U4Z7;Q8VDJ3;A0A087WP83;A0PJE9;Q8BX68;A0A087WS92;A0A087WQY9;A0A087WPC5;A0A087WPH2	Uncharacterized protein	Hdlbp	tr|Q3V1M8|Q3V1M8_MOUSE Uncharacterized protein OS=Mus musculus OX=10090 GN=Hdlbp PE=2 SV=1;tr|Q3U4Z7|Q3U4Z7_MOUSE Uncharacterized protein OS=Mus musculus OX=10090 GN=Hdlbp PE=1 SV=1;sp|Q8VDJ3|VIGLN_MOUSE Vigilin OS=Mus musculus OX=10090 GN=Hdlbp PE=1 SV=1;	10	12	12	12.6	141.74	1268	98.555	5.8	12.6	78962000	305810000	3.87288
Q3UDE2;F2Z423	Tubulin--tyrosine ligase-like protein 12 (Inactive tubulin--tyrosine ligase-like protein 12)	Ttll12	sp|Q3UDE2|TTL12_MOUSE Tubulin--tyrosine ligase-like protein 12 OS=Mus musculus OX=10090 GN=Ttll12 PE=1 SV=1	2	12	12	24.4	74.042	639	85.581	24.4	5.8	382360000	18048000	0.0472016
Q3UYV9;Q3TLK3	Nuclear cap-binding protein subunit 1 (80 kDa nuclear cap-binding protein) (CBP80) (NCBP 80 kDa subunit)	Ncbp1 Cbp80	sp|Q3UYV9|NCBP1_MOUSE Nuclear cap-binding protein subunit 1 OS=Mus musculus OX=10090 GN=Ncbp1 PE=1 SV=2;tr|Q3TLK3|Q3TLK3_MOUSE MIF4G domain-containing protein OS=Mus musculus OX=10090 GN=Ncbp1 PE=2 SV=1	2	12	12	19	91.926	790	122.72	19	10.9	515540000	284810000	0.55245
Q58E70;Q8C7C3;D3Z6I8;E9Q7Q3;Q3TJ53;D3Z2H9;Q8K0Z5;E9Q5J9;A0A0R4J1P2;P21107;D3YVR0;A2AIM5;S4R2U0;E9Q452;Q9D1R6;Q8BSH3;Q8BP43;Q6PJ18;Q61344;Q564G1;Q545Y3;E9Q450;E9Q448;B7ZNL3;A2AIM4;A0A2R2Y2P8;E9Q454;Q91VH3;F8WID5;P58774;P58771	Tpm3 protein	Tpm3	tr|Q58E70|Q58E70_MOUSE Tpm3 protein OS=Mus musculus OX=10090 GN=Tpm3 PE=2 SV=1;tr|Q8C7C3|Q8C7C3_MOUSE Uncharacterized protein OS=Mus musculus OX=10090 GN=Tpm3 PE=2 SV=1;tr|D3Z6I8|D3Z6I8_MOUSE Tropomyosin alpha-3 chain OS=Mus musculus OX=10090 GN=Tpm3 PE=1	31	14	12	40.7	29.02	248	160.34	40.7	40.7	1328400000	857050000	0.645175
Q5SUH7;Q5SUH6;Q3UPG6;Q99KN9;Q3UGL3;Q3TJF5	Clathrin interactor 1	Clint1 AI642036	tr|Q5SUH7|Q5SUH7_MOUSE Clathrin interactor 1 OS=Mus musculus OX=10090 GN=Clint1 PE=1 SV=1;tr|Q5SUH6|Q5SUH6_MOUSE Clathrin interactor 1 OS=Mus musculus OX=10090 GN=Clint1 PE=1 SV=1;tr|Q3UPG6|Q3UPG6_MOUSE ENTH domain-containing protein OS=Mus musculus OX=100	6	12	12	24.6	67.73	623	88.305	19.6	24.6	392480000	739100000	1.88315
Q5SWU9;V9GXY1;V9GWS0;Q3UHC8;E9Q4Z2	Acetyl-CoA carboxylase 1 (ACC1) (EC 6.4.1.2) (ACC-alpha) (Acetyl-CoA carboxylase 265)	Acaca Acac Gm738	sp|Q5SWU9|ACACA_MOUSE Acetyl-CoA carboxylase 1 OS=Mus musculus OX=10090 GN=Acaca PE=1 SV=1	5	12	12	6.5	265.25	2345	93.043	6.5	4.4	293170000	133300000	0.454685
Q6PB66;F6V2A3	Leucine-rich PPR motif-containing protein, mitochondrial (130 kDa leucine-rich protein) (LRP 130) (mLRP130)	Lrpprc Lrp130	sp|Q6PB66|LPPRC_MOUSE Leucine-rich PPR motif-containing protein, mitochondrial OS=Mus musculus OX=10090 GN=Lrpprc PE=1 SV=2	2	12	12	11.6	156.61	1392	82.965	9.7	11.1	82127000	192100000	2.33906
Q8BTX6;Q9CZU3;Q8BVI7;Q8BVK1;Q91YT4;Q6ZQK1	Uncharacterized protein (Fragment)	Mtrex Skiv2l2	tr|Q8BTX6|Q8BTX6_MOUSE Uncharacterized protein (Fragment) OS=Mus musculus OX=10090 GN=Mtrex PE=2 SV=1;sp|Q9CZU3|MTREX_MOUSE Exosome RNA helicase MTR4 OS=Mus musculus OX=10090 GN=Mtrex PE=1 SV=1;tr|Q8BVI7|Q8BVI7_MOUSE Uncharacterized protein (Fragment) OS=M	6	12	12	17.1	112.62	993	87.708	17.1	13.3	460650000	282680000	0.613655
Q8C129;Q3TTA8;Q8BZ14;Q6NY09	Leucyl-cystinyl aminopeptidase (Cystinyl aminopeptidase) (EC 3.4.11.3) (Oxytocinase) (OTase)	Lnpep	sp|Q8C129|LCAP_MOUSE Leucyl-cystinyl aminopeptidase OS=Mus musculus OX=10090 GN=Lnpep PE=1 SV=1;tr|Q3TTA8|Q3TTA8_MOUSE Aminopeptidase (Fragment) OS=Mus musculus OX=10090 GN=Lnpep PE=2 SV=1;tr|Q8BZ14|Q8BZ14_MOUSE Peptidase_M1 domain-containing protein OS=Mu	4	12	12	13.1	117.3	1025	104.16	10.6	13.1	367730000	1131800000	3.0778
Q91VC3;E9PV04;A0A0N4SVP8;A2AFK7;A0A0N4SVM5	Eukaryotic initiation factor 4A-III (eIF-4A-III) (eIF4A-III) (EC 3.6.4.13) (ATP-dependent RNA helicase DDX48) (ATP-dependent RNA helicase eIF4A-3) (DEAD box protein 48) (Eukaryotic translation initiation factor 4A isoform 3) [Cleaved into: Eukaryotic initiation factor 4A-III, N-terminally processed]	Eif4a3 Ddx48	sp|Q91VC3|IF4A3_MOUSE Eukaryotic initiation factor 4A-III OS=Mus musculus OX=10090 GN=Eif4a3 PE=1 SV=3;tr|E9PV04|E9PV04_MOUSE RNA helicase OS=Mus musculus OX=10090 GN=Eif4a3l1 PE=3 SV=2;tr|A0A0N4SVP8|A0A0N4SVP8_MOUSE RNA helicase OS=Mus musculus OX=10090 G	5	13	12	30.9	46.839	411	88.211	27.7	28.2	421880000	761790000	1.8057
Q9CSH3;Q8R2P7;A0A2I3BR78;A0A2I3BR88	Exosome complex exonuclease RRP44 (EC 3.1.13.-) (EC 3.1.26.-) (Protein DIS3 homolog) (Ribosomal RNA-processing protein 44)	Dis3 Kiaa1008 Rrp44	sp|Q9CSH3|RRP44_MOUSE Exosome complex exonuclease RRP44 OS=Mus musculus OX=10090 GN=Dis3 PE=1 SV=4	4	12	12	17.5	108.84	958	84.625	16.4	12.2	341480000	190090000	0.556665
Q9DB05;Q9CXX1;P28663;A0A1B0GR35	Alpha-soluble NSF attachment protein (SNAP-alpha) (N-ethylmaleimide-sensitive factor attachment protein alpha)	Napa Snapa	sp|Q9DB05|SNAA_MOUSE Alpha-soluble NSF attachment protein OS=Mus musculus OX=10090 GN=Napa PE=1 SV=1;tr|Q9CXX1|Q9CXX1_MOUSE Uncharacterized protein OS=Mus musculus OX=10090 GN=Napa PE=2 SV=1	4	12	12	50.8	33.189	295	114.7	48.5	47.5	715360000	1287400000	1.79965
Q9EPU0	Regulator of nonsense transcripts 1 (EC 3.6.4.-) (ATP-dependent helicase RENT1) (Nonsense mRNA reducing factor 1) (NORF1) (Up-frameshift suppressor 1 homolog) (mUpf1)	Upf1 Rent1	sp|Q9EPU0|RENT1_MOUSE Regulator of nonsense transcripts 1 OS=Mus musculus OX=10090 GN=Upf1 PE=1 SV=2	1	12	12	16.1	123.97	1124	81.472	13.1	16.1	173200000	241870000	1.39648
Q9R190;Q3TZP3;Q3UDZ8;M1VQI8;M1V1V1;Q3UKM9;Q3U3A7;E9Q794;A4FTZ3;Q6ZPV1;Q3UII8;M1VB37;M1VHG3;F8WHY8;M1VHG6;Q2KHS8;E9PX23;M1VHG1;M1VMF6;Q924K8;Q8K4B0;M1VQI9;H3BLE1;Q3TY62	Metastasis-associated protein MTA2 (Metastasis-associated 1-like 1)	Mta2 Mta1l1	sp|Q9R190|MTA2_MOUSE Metastasis-associated protein MTA2 OS=Mus musculus OX=10090 GN=Mta2 PE=1 SV=1;tr|Q3TZP3|Q3TZP3_MOUSE Uncharacterized protein OS=Mus musculus OX=10090 GN=Mta2 PE=2 SV=1;tr|Q3UDZ8|Q3UDZ8_MOUSE Uncharacterized protein (Fragment) OS=Mus mu	24	12	12	19.6	75.029	668	93.211	19.6	16.8	431340000	491280000	1.13896
Q78ZJ8;A0A068BFR3;P46638;G3UY29;E9Q3P9;F8WGS1;G3UZD3;Q0PD45;P62492;Q3UZ37;G3UZL4;Q9QWU0;E9PZB2;E9Q6B3;F6R2Z5;P97345	RAB11B protein (RAB11B, member RAS oncogene family) (Rab11B)	Rab11b RAB11B Rab11B	tr|Q78ZJ8|Q78ZJ8_MOUSE RAB11B protein OS=Mus musculus OX=10090 GN=Rab11b PE=1 SV=1;tr|A0A068BFR3|A0A068BFR3_MOUSE RAS oncogene family protein OS=Mus musculus OX=10090 GN=Rab11b PE=2 SV=1;sp|P46638|RB11B_MOUSE Ras-related protein Rab-11B OS=Mus musculus OX=	16	11	11	57.8	24.489	218	86.203	57.8	54.1	665980000	810880000	1.21757
D2KHZ9;A0A0A0MQF6;P16858;S4R1W1;A0A1D5RLD8;S4R257;Q3TUZ9;Q4VBD1;Q6IWE3;Q8CEV2;V9GX06;Q3V2I5;A0A0R4J0X7;S4R2G5;Q64467;Q2VWQ4;S4R1N5;W8QM43;V9GXA7;Q8BJ40	Glyceraldehyde-3-phosphate dehydrogenase (EC 1.2.1.12)	Gapdh GAPDH	tr|D2KHZ9|D2KHZ9_MOUSE Glyceraldehyde-3-phosphate dehydrogenase OS=Mus musculus OX=10090 GN=Gapdh PE=2 SV=1;tr|A0A0A0MQF6|A0A0A0MQF6_MOUSE Glyceraldehyde-3-phosphate dehydrogenase OS=Mus musculus OX=10090 GN=Gapdh PE=1 SV=1;sp|P16858|G3P_MOUSE Glyceraldehy	20	14	11	47.1	35.81	333	158.82	45.3	47.1	10593000000	16068000000	1.51685
Q564E2;Q3TI99;A0A1B0GSX0;P06151;Q3UDU4;Q3TCI7;Q99K20;A0A1B0GSR9;Q3THB4;D3YZQ9;A0A1B0GT41;A0A1B0GQX5;A0A1B0GSL7;Q6NXW3;A0A1B0GRW9;A0A1B0GS79;A0A1B0GRC1;A0A1B0GRS2;Q3UIC3;A0A0N4SVV8;D3Z7F0;D3YVR7;D3YZE4;Q64483;Q548Z6;A0A6I8MX27;P00342;P16125	L-lactate dehydrogenase (EC 1.1.1.27)	Ldha Ldh1	tr|Q564E2|Q564E2_MOUSE L-lactate dehydrogenase OS=Mus musculus OX=10090 GN=Ldha PE=1 SV=1;tr|Q3TI99|Q3TI99_MOUSE L-lactate dehydrogenase OS=Mus musculus OX=10090 GN=Ldha PE=2 SV=1;tr|A0A1B0GSX0|A0A1B0GSX0_MOUSE L-lactate dehydrogenase OS=Mus musculus OX=10	28	11	11	34.6	36.498	332	94.998	34.6	34.6	4004400000	2056600000	0.513585
A0A494BBD8;Q4FJV4;B7STB7;Q3US43;P10107;Q4FK88;Q3U5N9	Annexin	Anxa1	tr|A0A494BBD8|A0A494BBD8_MOUSE Annexin OS=Mus musculus OX=10090 GN=Anxa1 PE=1 SV=1;tr|Q4FJV4|Q4FJV4_MOUSE Annexin OS=Mus musculus OX=10090 GN=Anxa1 PE=1 SV=1;tr|B7STB7|B7STB7_MOUSE Annexin OS=Mus musculus OX=10090 GN=Anxa1 PE=2 SV=1;tr|Q3US43|Q3US43_MOUSE	7	11	11	41.7	33.944	302	100.53	41.7	41.7	255570000	522150000	2.04308
Q3UDG0;Q3TMT4;Q3THE7;A7VL18;Q9JLJ2;Q3V1N7;Q3U367;Q3TG52;Q9CRH9	Aldedh domain-containing protein	Aldh9a1	tr|Q3UDG0|Q3UDG0_MOUSE Aldedh domain-containing protein OS=Mus musculus OX=10090 GN=Aldh9a1 PE=2 SV=1;tr|Q3TMT4|Q3TMT4_MOUSE Aldedh domain-containing protein OS=Mus musculus OX=10090 GN=Aldh9a1 PE=2 SV=1;tr|Q3THE7|Q3THE7_MOUSE Aldedh domain-containing prot	9	11	11	28.9	53.48	494	109.25	28.9	24.5	1905600000	334580000	0.175577
B2CY77;P14206;A0A1L1SRW0;A0A1L1SUK3	Laminin receptor (Fragment)	Rpsa	tr|B2CY77|B2CY77_MOUSE Laminin receptor (Fragment) OS=Mus musculus OX=10090 GN=Rpsa PE=2 SV=1;sp|P14206|RSSA_MOUSE 40S ribosomal protein SA OS=Mus musculus OX=10090 GN=Rpsa PE=1 SV=4	4	11	11	45.1	32.85	295	133.82	45.1	30.8	5433500000	972330000	0.178951
B2M1R6;Q3U9Q3;Q3U6X2;Q3TUA1;Q5FWJ5;Q3TL71;P61979;Q3TJ38;Q3TG17;H3BLL4;H3BKD0;A0A286YDM3;H3BK96;H3BKI8;A0A286YCM2;A0A286YEC4;H3BLP7;Q8BT23;A0A286YDH1;A0A286YE41;H3BJ43;H3BJS9	Heterogeneous nuclear ribonucleoprotein K	Hnrnpk Hnrpk	tr|B2M1R6|B2M1R6_MOUSE Heterogeneous nuclear ribonucleoprotein K OS=Mus musculus OX=10090 GN=Hnrnpk PE=1 SV=1;tr|Q3U9Q3|Q3U9Q3_MOUSE Heterogeneous nuclear ribonucleoprotein K OS=Mus musculus OX=10090 GN=Hnrnpk PE=2 SV=1;tr|Q3U6X2|Q3U6X2_MOUSE Heterogeneous	22	11	11	32.3	48.562	440	141.44	25.5	32.3	1360500000	2059800000	1.514
D3YZ62;D3Z4J3;Q99104;F6TDE5;G5E8G6;G3X9Y9;P21271;D6RFU0;D3Z135;B8JK05;A0A1L1SUF0;Q8BWY8;E9Q1F5	Unconventional myosin-Va	Myo5a	tr|D3YZ62|D3YZ62_MOUSE Unconventional myosin-Va OS=Mus musculus OX=10090 GN=Myo5a PE=1 SV=1;tr|D3Z4J3|D3Z4J3_MOUSE Unconventional myosin-Va OS=Mus musculus OX=10090 GN=Myo5a PE=1 SV=1;sp|Q99104|MYO5A_MOUSE Unconventional myosin-Va OS=Mus musculus OX=10090	13	11	11	7.6	212.33	1828	84.122	5.1	7.6	82231000	256210000	3.11573
E9PVX6	Proliferation marker protein Ki-67 (Antigen identified by monoclonal antibody Ki-67 homolog) (Antigen KI-67 homolog) (Antigen Ki67 homolog)	Mki67	sp|E9PVX6|KI67_MOUSE Proliferation marker protein Ki-67 OS=Mus musculus OX=10090 GN=Mki67 PE=1 SV=1	1	11	11	5.5	350.86	3177	75.295	0	5.5	0	261210000	#DIV/0!
E9Q634;Q8C123;Q3TLJ4;G3V011;Q8CG29;Q811E7;P70248;A0A1L1STM1;Q6KAL9	Unconventional myosin-Ie (Unconventional myosin 1E)	Myo1e Myr3	sp|E9Q634|MYO1E_MOUSE Unconventional myosin-Ie OS=Mus musculus OX=10090 GN=Myo1e PE=1 SV=1;tr|Q8C123|Q8C123_MOUSE Myosin motor domain-containing protein OS=Mus musculus OX=10090 GN=Myo1e PE=2 SV=1	9	11	11	11.4	126.82	1107	75.07	10.3	9.4	267940000	342680000	1.27894
O55029	Coatomer subunit beta' (Beta'-coat protein) (Beta'-COP) (p102)	Copb2	sp|O55029|COPB2_MOUSE Coatomer subunit beta OS=Mus musculus OX=10090 GN=Copb2 PE=1 SV=2	1	11	11	20.4	102.45	905	94.944	17.2	19.2	339580000	500400000	1.47359
P08249;A0A0G2JF23;A0A0G2JGY4	Malate dehydrogenase, mitochondrial (EC 1.1.1.37)	Mdh2 Mor1	sp|P08249|MDHM_MOUSE Malate dehydrogenase, mitochondrial OS=Mus musculus OX=10090 GN=Mdh2 PE=1 SV=3	3	11	11	44.4	35.611	338	102.39	44.4	40.5	1004200000	427180000	0.425393
Q544K9;Q3TVV7;P13439;D6RJ62	OMPdecase (EC 2.4.2.10) (EC 4.1.1.23) (Orotate phosphoribosyltransferase) (Orotidine 5'-phosphate decarboxylase) (Uridine 5'-monophosphate synthase)	Umps	tr|Q544K9|Q544K9_MOUSE OMPdecase OS=Mus musculus OX=10090 GN=Umps PE=1 SV=1;tr|Q3TVV7|Q3TVV7_MOUSE OMPdecase OS=Mus musculus OX=10090 GN=Umps PE=2 SV=1;sp|P13439|UMPS_MOUSE Uridine 5-monophosphate synthase OS=Mus musculus OX=10090 GN=Umps PE=1 SV=3	4	11	11	29.7	52.292	481	76.896	27.2	22	412000000	294960000	0.715922
Q5M8R8;P14869;Q5FWB6;D3YVM5;S4R1N1;O89073	60S acidic ribosomal protein P0	Rplp0 Arbp	tr|Q5M8R8|Q5M8R8_MOUSE 60S acidic ribosomal protein P0 OS=Mus musculus OX=10090 GN=Rplp0 PE=2 SV=1;sp|P14869|RLA0_MOUSE 60S acidic ribosomal protein P0 OS=Mus musculus OX=10090 GN=Rplp0 PE=1 SV=3;tr|Q5FWB6|Q5FWB6_MOUSE 60S acidic ribosomal protein P0 OS=Mu	6	11	11	43.8	34.216	317	80.659	41	43.8	3045200000	4565100000	1.49911
Q544Y7;P18760;F8WGL3;A0A494B9A7;Q9CX22;Q3UHW9;P45591	Cofilin, non-muscle isoform (Cofilin-1)	Cfl1	tr|Q544Y7|Q544Y7_MOUSE Cofilin, non-muscle isoform OS=Mus musculus OX=10090 GN=Cfl1 PE=2 SV=1;sp|P18760|COF1_MOUSE Cofilin-1 OS=Mus musculus OX=10090 GN=Cfl1 PE=1 SV=3;tr|F8WGL3|F8WGL3_MOUSE Cofilin, non-muscle isoform OS=Mus musculus OX=10090 GN=Cfl1 PE=1	7	11	11	59	18.559	166	96.043	59	59	2473400000	2372100000	0.959044
Q3TCL2;Q5U415;Q3UDY1;P45376;D3YVJ7;Q3ULP0	Aldo_ket_red domain-containing protein (Fragment)	Akr1b3	tr|Q3TCL2|Q3TCL2_MOUSE Aldo_ket_red domain-containing protein (Fragment) OS=Mus musculus OX=10090 GN=Akr1b3 PE=2 SV=1;tr|Q5U415|Q5U415_MOUSE Aldo-keto reductase family 1, member B3 (Aldose reductase) OS=Mus musculus OX=10090 GN=Akr1b3 PE=2 SV=1;tr|Q3UDY1|Q	6	11	11	34.8	35.051	310	84.143	34.8	14.8	1220700000	296890000	0.243213
Q3UCH0;P47911;Q3UFI4;A0A0J9YU32	60S ribosomal protein L6	Rpl6	tr|Q3UCH0|Q3UCH0_MOUSE 60S ribosomal protein L6 OS=Mus musculus OX=10090 GN=Rpl6 PE=1 SV=1;sp|P47911|RL6_MOUSE 60S ribosomal protein L6 OS=Mus musculus OX=10090 GN=Rpl6 PE=1 SV=3;tr|Q3UFI4|Q3UFI4_MOUSE 60S ribosomal protein L6 OS=Mus musculus OX=10090 GN=R	4	11	11	29.4	33.509	296	75.547	22.3	29.4	436420000	3791800000	8.68842
P54071;A0A0U1RP68;D6RIL6	Isocitrate dehydrogenase [NADP], mitochondrial (IDH) (EC 1.1.1.42) (ICD-M) (IDP) (NADP(+)-specific ICDH) (Oxalosuccinate decarboxylase)	Idh2	sp|P54071|IDHP_MOUSE Isocitrate dehydrogenase [NADP], mitochondrial OS=Mus musculus OX=10090 GN=Idh2 PE=1 SV=3	3	12	11	27.4	50.906	452	105.4	22.8	27.4	767840000	1174400000	1.52949
Q545F8;Q545X8;Q3UXQ6;P62702;Q3V1Z5;V9GWY0	40S ribosomal protein S4	Rps4x	tr|Q545F8|Q545F8_MOUSE 40S ribosomal protein S4 OS=Mus musculus OX=10090 GN=Rps4x PE=2 SV=1;tr|Q545X8|Q545X8_MOUSE 40S ribosomal protein S4 OS=Mus musculus OX=10090 GN=Rps4x PE=1 SV=1;tr|Q3UXQ6|Q3UXQ6_MOUSE 40S ribosomal protein S4 OS=Mus musculus OX=10090	6	11	11	46.9	27.504	245	97.882	46.9	42.9	1162300000	2609800000	2.24538
Q6P5E5;Q1HL32;Q9CW03;Q6PIE1;Q6PFZ4;Q3UNU2;Q3US85;Q3TPG9;Q3TMK9	Structural maintenance of chromosomes protein	Smc3 Cspg6	tr|Q6P5E5|Q6P5E5_MOUSE Structural maintenance of chromosomes protein OS=Mus musculus OX=10090 GN=Smc3 PE=2 SV=1;tr|Q1HL32|Q1HL32_MOUSE Structural maintenance of chromosomes protein OS=Mus musculus OX=10090 GN=Smc3 PE=1 SV=1;sp|Q9CW03|SMC3_MOUSE Structural	9	11	11	12.4	141.44	1216	79.317	3	12.4	81349000	340240000	4.18247
Q543B9;Q3TCS0;Q9QUR6;Q8C6A3;Q3TQ97	Post-proline cleaving enzyme (EC 3.4.21.26) (Prolyl endopeptidase)	Prep	tr|Q543B9|Q543B9_MOUSE Post-proline cleaving enzyme OS=Mus musculus OX=10090 GN=Prep PE=1 SV=1;tr|Q3TCS0|Q3TCS0_MOUSE Post-proline cleaving enzyme OS=Mus musculus OX=10090 GN=Prep PE=2 SV=1;sp|Q9QUR6|PPCE_MOUSE Prolyl endopeptidase OS=Mus musculus OX=10090	5	11	11	23.9	80.751	710	83.718	23.9	12.8	368180000	135180000	0.367157
Q3TEE6;Q8K1B8;Q6NXZ9;A0A494B9W3;A0A494BBJ8;A0A494B9F7	PH domain-containing protein	Fermt3 BC032204	tr|Q3TEE6|Q3TEE6_MOUSE PH domain-containing protein OS=Mus musculus OX=10090 GN=Fermt3 PE=1 SV=1;sp|Q8K1B8|URP2_MOUSE Fermitin family homolog 3 OS=Mus musculus OX=10090 GN=Fermt3 PE=1 SV=1;tr|Q6NXZ9|Q6NXZ9_MOUSE Fermt3 protein OS=Mus musculus OX=10090 GN=F	6	11	11	19.1	75.634	665	87.619	17.9	17	515060000	231960000	0.450355
Q922Z3;Q3UPJ8;Q3TSG8;Q3TK29;Q9CQN1;Q922R9	Trap1 protein (Fragment)	Trap1	tr|Q922Z3|Q922Z3_MOUSE Trap1 protein (Fragment) OS=Mus musculus OX=10090 GN=Trap1 PE=2 SV=1;tr|Q3UPJ8|Q3UPJ8_MOUSE HATPase_c domain-containing protein OS=Mus musculus OX=10090 GN=Trap1 PE=2 SV=1;tr|Q3TSG8|Q3TSG8_MOUSE Uncharacterized protein OS=Mus musculu	6	11	11	21.4	80.077	705	95.796	12.8	21.4	123050000	557400000	4.52987
Q3U7Z6;Q9DBJ1;Q6NWV5;Q5NCI4;O70250	Phosphoglycerate mutase (EC 5.4.2.11) (EC 5.4.2.4)	Pgam1	tr|Q3U7Z6|Q3U7Z6_MOUSE Phosphoglycerate mutase OS=Mus musculus OX=10090 GN=Pgam1 PE=1 SV=1;sp|Q9DBJ1|PGAM1_MOUSE Phosphoglycerate mutase 1 OS=Mus musculus OX=10090 GN=Pgam1 PE=1 SV=3;tr|Q6NWV5|Q6NWV5_MOUSE Pgam1 protein (Fragment) OS=Mus musculus OX=10090	5	11	11	46.5	28.832	254	101.39	46.5	46.5	2330100000	1026000000	0.440324
Q542F1;Q9Z1Q5;Q3TIP8	Chloride intracellular channel protein	Clic1	tr|Q542F1|Q542F1_MOUSE Chloride intracellular channel protein OS=Mus musculus OX=10090 GN=Clic1 PE=1 SV=1;sp|Q9Z1Q5|CLIC1_MOUSE Chloride intracellular channel protein 1 OS=Mus musculus OX=10090 GN=Clic1 PE=1 SV=3;tr|Q3TIP8|Q3TIP8_MOUSE Chloride intracellul	3	11	11	61.4	27.013	241	96.415	61.4	56.4	749080000	913170000	1.21906
Q564E8;Q9D8E6;Q9CSM5;Q5ZEY2	60S ribosomal protein L4	Rpl4	tr|Q564E8|Q564E8_MOUSE 60S ribosomal protein L4 OS=Mus musculus OX=10090 GN=Rpl4 PE=1 SV=1;sp|Q9D8E6|RL4_MOUSE 60S ribosomal protein L4 OS=Mus musculus OX=10090 GN=Rpl4 PE=1 SV=3;tr|Q9CSM5|Q9CSM5_MOUSE 60S ribosomal protein L4 OS=Mus musculus OX=10090 GN=R	4	11	11	26	47.153	419	121.1	18.4	26	325370000	4124200000	12.6754
Q5XJY5;Q3U4S9;Q8C0G7;Q8R1S6;Q3TDU1	Coatomer subunit delta (Archain) (Delta-coat protein) (Delta-COP)	Arcn1 Copd	sp|Q5XJY5|COPD_MOUSE Coatomer subunit delta OS=Mus musculus OX=10090 GN=Arcn1 PE=1 SV=2;tr|Q3U4S9|Q3U4S9_MOUSE Coatomer subunit delta OS=Mus musculus OX=10090 GN=Arcn1 PE=2 SV=1;tr|Q8C0G7|Q8C0G7_MOUSE Coatomer subunit delta OS=Mus musculus OX=10090 GN=Arcn	5	11	11	23.1	57.229	511	76.2	20.7	19.4	259910000	412120000	1.58563
Q60930;G3UX26;A0A286YCR8;D3YZT5;D3YUN8	Voltage-dependent anion-selective channel protein 2 (VDAC-2) (mVDAC2) (Outer mitochondrial membrane protein porin 2) (Voltage-dependent anion-selective channel protein 6) (VDAC-6) (mVDAC6)	Vdac2 Vdac6	sp|Q60930|VDAC2_MOUSE Voltage-dependent anion-selective channel protein 2 OS=Mus musculus OX=10090 GN=Vdac2 PE=1 SV=2;tr|G3UX26|G3UX26_MOUSE Outer mitochondrial membrane protein porin 2 OS=Mus musculus OX=10090 GN=Vdac2 PE=1 SV=1;tr|A0A286YCR8|A0A286YCR8_M	5	11	11	51.5	31.732	295	88.74	0	51.5	0	1597300000	#DIV/0!
Q6GQT9	Nodal modulator 1	Nomo1	sp|Q6GQT9|NOMO1_MOUSE Nodal modulator 1 OS=Mus musculus OX=10090 GN=Nomo1 PE=1 SV=1	1	11	11	11.3	133.42	1214	77.571	0.7	11.3	54655000	450020000	8.23383
Q7TT37	Elongator complex protein 1 (ELP1) (IkappaB kinase complex-associated protein) (IKK complex-associated protein)	Elp1 Ikap Ikbkap	sp|Q7TT37|ELP1_MOUSE Elongator complex protein 1 OS=Mus musculus OX=10090 GN=Elp1 PE=1 SV=2	1	11	11	11.8	149.58	1333	73.478	10.4	9.3	191650000	282990000	1.4766
Q80WJ7;E9PUX0;F6QFT1;F6QHD1;Q3TAB3;F6ZSG0;F6ZQL0;A0A2I3BRF4	Protein LYRIC (3D3/LYRIC) (Lysine-rich CEACAM1 co-isolated protein) (Metadherin) (Metastasis adhesion protein)	Mtdh Lyric	sp|Q80WJ7|LYRIC_MOUSE Protein LYRIC OS=Mus musculus OX=10090 GN=Mtdh PE=1 SV=1	8	11	11	25.4	63.845	579	104.08	2.8	25.4	5030300	1078700000	214.44
Q8BFY9;Q3TKD0;Q3TQW0;J3QMX2;Q3TS78;Q99LG2;Q3U316;Q3U1S0;E9PV58	Transportin-1 (Importin beta-2) (Karyopherin beta-2)	Tnpo1 Kpnb2	sp|Q8BFY9|TNPO1_MOUSE Transportin-1 OS=Mus musculus OX=10090 GN=Tnpo1 PE=1 SV=2;tr|Q3TKD0|Q3TKD0_MOUSE Transportin-1 (Fragment) OS=Mus musculus OX=10090 GN=Tnpo1 PE=1 SV=1	9	11	11	17.6	102.36	898	115.41	16.4	17.6	554540000	675570000	1.21825
Q8BMK4	Cytoskeleton-associated protein 4 (63-kDa cytoskeleton-linking membrane protein) (Climp-63) (p63)	Ckap4	sp|Q8BMK4|CKAP4_MOUSE Cytoskeleton-associated protein 4 OS=Mus musculus OX=10090 GN=Ckap4 PE=1 SV=2	1	11	11	23.5	63.691	575	79.004	1.9	23.5	0	451090000	#DIV/0!
Q8BTI8	Serine/arginine repetitive matrix protein 2	Srrm2 Kiaa0324	sp|Q8BTI8|SRRM2_MOUSE Serine/arginine repetitive matrix protein 2 OS=Mus musculus OX=10090 GN=Srrm2 PE=1 SV=3	1	11	11	6	294.84	2703	100.28	1	6	15344000	633060000	41.2578
Q8VIJ6;Q3TZL2;Q9Z1Q0;Q810V5	Splicing factor, proline- and glutamine-rich (DNA-binding p52/p100 complex, 100 kDa subunit) (Polypyrimidine tract-binding protein-associated-splicing factor) (PSF) (PTB-associated-splicing factor)	Sfpq Psf	sp|Q8VIJ6|SFPQ_MOUSE Splicing factor, proline- and glutamine-rich OS=Mus musculus OX=10090 GN=Sfpq PE=1 SV=1;tr|Q3TZL2|Q3TZL2_MOUSE Uncharacterized protein (Fragment) OS=Mus musculus OX=10090 GN=Sfpq PE=2 SV=1;tr|Q9Z1Q0|Q9Z1Q0_MOUSE PTB-associated splicing	4	12	11	20.7	75.441	699	113.22	16.3	20.7	467990000	1585400000	3.38768
Q91YR7	Pre-mRNA-processing factor 6 (PRP6 homolog) (U5 snRNP-associated 102 kDa protein) (U5-102 kDa protein)	Prpf6	sp|Q91YR7|PRP6_MOUSE Pre-mRNA-processing factor 6 OS=Mus musculus OX=10090 GN=Prpf6 PE=1 SV=1	1	11	11	13.8	106.72	941	63.044	1.2	13.8	27773000	267640000	9.6367
Q99KP6	Pre-mRNA-processing factor 19 (EC 2.3.2.27) (Nuclear matrix protein 200) (PRP19/PSO4 homolog) (RING-type E3 ubiquitin transferase PRP19) (Senescence evasion factor)	Prpf19 Prp19 Snev	sp|Q99KP6|PRP19_MOUSE Pre-mRNA-processing factor 19 OS=Mus musculus OX=10090 GN=Prpf19 PE=1 SV=1	1	11	11	36.9	55.238	504	91.799	31.7	29.6	829400000	847770000	1.02215
Q9QZD9;Q3T9Y8;A2AE03	Eukaryotic translation initiation factor 3 subunit I (eIF3i) (Eukaryotic translation initiation factor 3 subunit 2) (TGF-beta receptor-interacting protein 1) (TRIP-1) (eIF-3-beta) (eIF3 p36)	Eif3i Eif3s2 Trip1	sp|Q9QZD9|EIF3I_MOUSE Eukaryotic translation initiation factor 3 subunit I OS=Mus musculus OX=10090 GN=Eif3i PE=1 SV=1;tr|Q3T9Y8|Q3T9Y8_MOUSE Eukaryotic translation initiation factor 3 subunit I OS=Mus musculus OX=10090 GN=Eif3i PE=2 SV=1;tr|A2AE03|A2AE03_	3	11	11	51.7	36.46	325	101.48	48.9	30.8	886720000	410440000	0.462874
Q9WTR1	Transient receptor potential cation channel subfamily V member 2 (TrpV2) (Growth factor-regulated calcium channel) (GRC) (Osm-9-like TRP channel 2) (OTRPC2)	Trpv2 Grc	sp|Q9WTR1|TRPV2_MOUSE Transient receptor potential cation channel subfamily V member 2 OS=Mus musculus OX=10090 GN=Trpv2 PE=1 SV=2	1	11	11	18	85.964	756	89.034	16.7	16.1	317430000	431330000	1.35882
A0A0A0MQM0;P63242;J3QPS8;Q8BGY2;Q66JR8	Eukaryotic translation initiation factor 5A (eIF-5A) (Fragment)	Eif5a	tr|A0A0A0MQM0|A0A0A0MQM0_MOUSE Eukaryotic translation initiation factor 5A (Fragment) OS=Mus musculus OX=10090 GN=Eif5a PE=1 SV=1;sp|P63242|IF5A1_MOUSE Eukaryotic translation initiation factor 5A-1 OS=Mus musculus OX=10090 GN=Eif5a PE=1 SV=2;tr|J3QPS8|J3QP	5	10	10	64.4	16.302	149	78.374	64.4	64.4	798530000	1071800000	1.34222
A2AW05;Q05DR5;Q08943	FACT complex subunit SSRP1 (Fragment)	Ssrp1	tr|A2AW05|A2AW05_MOUSE FACT complex subunit SSRP1 (Fragment) OS=Mus musculus OX=10090 GN=Ssrp1 PE=1 SV=1;tr|Q05DR5|Q05DR5_MOUSE FACT complex subunit SSRP1 (Fragment) OS=Mus musculus OX=10090 GN=Ssrp1 PE=2 SV=1;sp|Q08943|SSRP1_MOUSE FACT complex subunit SSR	3	10	10	20.4	71.527	623	80.303	18.3	18.6	222180000	530740000	2.38878
B2RRH9;Q3THK7	Glutamine amidotransferase (EC 6.3.5.2)	Gmps	tr|B2RRH9|B2RRH9_MOUSE Glutamine amidotransferase OS=Mus musculus OX=10090 GN=Gmps PE=1 SV=1;sp|Q3THK7|GUAA_MOUSE GMP synthase [glutamine-hydrolyzing] OS=Mus musculus OX=10090 GN=Gmps PE=1 SV=2	2	10	10	23.5	76.723	693	76.865	21.9	21.6	338440000	135000000	0.398889
B2RWW1;Q8C052;A0A1D5RLY6;A0A1D5RMG7	Microtubule-associated protein 1S	Map1s Mtap1s	tr|B2RWW1|B2RWW1_MOUSE Microtubule-associated protein 1S OS=Mus musculus OX=10090 GN=Map1s PE=2 SV=1;sp|Q8C052|MAP1S_MOUSE Microtubule-associated protein 1S OS=Mus musculus OX=10090 GN=Map1s PE=1 SV=2;tr|A0A1D5RLY6|A0A1D5RLY6_MOUSE Microtubule-associated p	4	10	10	13.1	103.02	973	67.452	13.1	8.8	126430000	105580000	0.835087
E9PUB7;Q2YDW2;D3YX87	Protein misato homolog 1	Msto1	tr|E9PUB7|E9PUB7_MOUSE Protein misato homolog 1 OS=Mus musculus OX=10090 GN=Msto1 PE=1 SV=1;sp|Q2YDW2|MSTO1_MOUSE Protein misato homolog 1 OS=Mus musculus OX=10090 GN=Msto1 PE=1 SV=1;tr|D3YX87|D3YX87_MOUSE Protein misato homolog 1 OS=Mus musculus OX=10090	3	10	10	19.8	61.207	556	95.62	19.8	15.1	387490000	217810000	0.562105
E9PUW7;Q9EPK7;A0A2I3BQV5	Exportin-7	Xpo7	tr|E9PUW7|E9PUW7_MOUSE Exportin-7 OS=Mus musculus OX=10090 GN=Xpo7 PE=1 SV=1;sp|Q9EPK7|XPO7_MOUSE Exportin-7 OS=Mus musculus OX=10090 GN=Xpo7 PE=1 SV=3;tr|A0A2I3BQV5|A0A2I3BQV5_MOUSE Exportin-7 OS=Mus musculus OX=10090 GN=Xpo7 PE=1 SV=1	3	10	10	12	123.9	1088	112.25	12	2.3	363710000	57383000	0.157771
E9QK83;Q5XG71;Q3ULE2	Small subunit processome component 20 homolog	Utp20	tr|E9QK83|E9QK83_MOUSE Small subunit processome component 20 homolog OS=Mus musculus OX=10090 GN=Utp20 PE=1 SV=1;sp|Q5XG71|UTP20_MOUSE Small subunit processome component 20 homolog OS=Mus musculus OX=10090 GN=Utp20 PE=1 SV=2	3	10	10	5.8	317.87	2789	65.935	1.4	5.8	3604500	184940000	51.3081
E9QPI5;Q6A026;Q8VDS0;Q9D337	Sister chromatid cohesion protein PDS5 homolog A	Pds5a	tr|E9QPI5|E9QPI5_MOUSE Sister chromatid cohesion protein PDS5 homolog A OS=Mus musculus OX=10090 GN=Pds5a PE=1 SV=1;sp|Q6A026|PDS5A_MOUSE Sister chromatid cohesion protein PDS5 homolog A OS=Mus musculus OX=10090 GN=Pds5a PE=1 SV=3;tr|Q8VDS0|Q8VDS0_MOUSE Pd	4	10	10	11	150.22	1332	87.586	7.6	10.3	176560000	294700000	1.66912
Q561N5;F6YVP7;P62270;Q3TW65;A0A1Y7VKY1;S4R1N6;A0A3Q4EGP3	40S ribosomal protein S18	Rps18	tr|Q561N5|Q561N5_MOUSE 40S ribosomal protein S18 OS=Mus musculus OX=10090 GN=Rps18 PE=2 SV=1;tr|F6YVP7|F6YVP7_MOUSE 40S ribosomal protein S18 OS=Mus musculus OX=10090 GN=Rps18-ps6 PE=3 SV=2;sp|P62270|RS18_MOUSE 40S ribosomal protein S18 OS=Mus musculus OX=	7	10	10	53.3	17.718	152	80.535	53.3	53.3	980630000	2576800000	2.6277
Q3UMT7;G5E924;Q8R081;G3UY38;Q9CVU5;Q8BI42;G3UY56;G3UYY3	Uncharacterized protein	Hnrnpl Hnrpl	tr|Q3UMT7|Q3UMT7_MOUSE Uncharacterized protein OS=Mus musculus OX=10090 GN=Hnrnpl PE=2 SV=1;tr|G5E924|G5E924_MOUSE Heterogeneous nuclear ribonucleoprotein L (Fragment) OS=Mus musculus OX=10090 GN=Hnrnpl PE=1 SV=1;sp|Q8R081|HNRPL_MOUSE Heterogeneous nuclear	8	10	10	25	64.075	592	80.451	21.3	25	519330000	719220000	1.3849
H3BJU7;H3BJ45;H3BJ40;H3BKH9;H3BJX8;Q60875;A0A2X0SFE2;Q3TYZ4;H3BLJ1;H3BIX8;H3BLF9;H3BJ59;H3BL15;H3BJM4;H3BJ48	Guanine nucleotide exchange factor H1 (Rho guanine nucleotide exchange factor 2)	Arhgef2	tr|H3BJU7|H3BJU7_MOUSE Guanine nucleotide exchange factor H1 OS=Mus musculus OX=10090 GN=Arhgef2 PE=1 SV=1;tr|H3BJ45|H3BJ45_MOUSE Guanine nucleotide exchange factor H1 OS=Mus musculus OX=10090 GN=Arhgef2 PE=1 SV=1;tr|H3BJ40|H3BJ40_MOUSE Guanine nucleotide	15	10	10	12.2	108.59	956	70.969	1.6	12.2	20958000	316440000	15.0988
Q6NXX6;K3W4T3;Q9Z1G4;Q3TY98;Q3TXT5;Q99M55;A2A599	V-type proton ATPase subunit a	Atp6v0a1	tr|Q6NXX6|Q6NXX6_MOUSE V-type proton ATPase subunit a OS=Mus musculus OX=10090 GN=Atp6v0a1 PE=2 SV=1;tr|K3W4T3|K3W4T3_MOUSE V-type proton ATPase subunit a OS=Mus musculus OX=10090 GN=Atp6v0a1 PE=1 SV=1;sp|Q9Z1G4|VPP1_MOUSE V-type proton ATPase 116 kDa subu	7	10	10	13.5	95.64	832	98.562	5.3	13.5	120280000	656350000	5.45685
O55108;O55107;P18572;K3W4Q8;J3QP71	Basigin (Fragment)	Bsg	tr|O55108|O55108_MOUSE Basigin (Fragment) OS=Mus musculus OX=10090 GN=Bsg PE=1 SV=1;tr|O55107|O55107_MOUSE Basigin (Fragment) OS=Mus musculus OX=10090 GN=Bsg PE=2 SV=1;sp|P18572|BASI_MOUSE Basigin OS=Mus musculus OX=10090 GN=Bsg PE=1 SV=2;tr|K3W4Q8|K3W4Q8_	5	10	10	40.1	28.255	257	93.185	40.1	40.1	8613800000	7478800000	0.868235
Q3UKQ5;Q3UF03;P24668	Uncharacterized protein	M6pr	tr|Q3UKQ5|Q3UKQ5_MOUSE Uncharacterized protein OS=Mus musculus OX=10090 GN=M6pr PE=1 SV=1;tr|Q3UF03|Q3UF03_MOUSE Uncharacterized protein OS=Mus musculus OX=10090 GN=M6pr PE=2 SV=1;sp|P24668|MPRD_MOUSE Cation-dependent mannose-6-phosphate receptor OS=Mus mu	3	10	10	33.5	31.172	278	141.95	33.5	25.9	3342100000	2080100000	0.622393
Q3UB90;Q3UB67;Q3UB15;Q3U9L3;Q3T9U9;P27659;A0A087WNS0;A0A087WQK0;A0A2R8VHN4;Q99N25;Q9CQ09;Q5U470;E9PWZ3	Uncharacterized protein	Rpl3	tr|Q3UB90|Q3UB90_MOUSE Uncharacterized protein OS=Mus musculus OX=10090 GN=Rpl3 PE=2 SV=1;tr|Q3UB67|Q3UB67_MOUSE Uncharacterized protein OS=Mus musculus OX=10090 GN=Rpl3 PE=2 SV=1;tr|Q3UB15|Q3UB15_MOUSE Uncharacterized protein OS=Mus musculus OX=10090 GN=R	13	10	10	27.5	46.079	403	89.171	20.8	27.5	195260000	1820900000	9.32551
Q3U7F3;Q3TIK8;Q5EBP8;Q3UK83;P49312;Q3TFB1;B7ZWG9;V9GXF8	Helix-destabilizing protein (Heterogeneous nuclear ribonucleoprotein A1) (Heterogeneous nuclear ribonucleoprotein A1, N-terminally processed) (hnRNP core protein A1)	Hnrnpa1 Hnrpa1	tr|Q3U7F3|Q3U7F3_MOUSE Helix-destabilizing protein OS=Mus musculus OX=10090 GN=Hnrnpa1 PE=2 SV=1;tr|Q3TIK8|Q3TIK8_MOUSE Helix-destabilizing protein OS=Mus musculus OX=10090 GN=Hnrnpa1 PE=2 SV=1;tr|Q5EBP8|Q5EBP8_MOUSE Helix-destabilizing protein OS=Mus musc	8	10	10	42.8	34.238	320	86.998	33.4	39.7	391330000	1186600000	3.03222
Q52L97;P52293;Q641N9;A2A600;A2A601;A6PW68	Importin subunit alpha	Kpna2	tr|Q52L97|Q52L97_MOUSE Importin subunit alpha OS=Mus musculus OX=10090 GN=Kpna2 PE=1 SV=1;sp|P52293|IMA1_MOUSE Importin subunit alpha-1 OS=Mus musculus OX=10090 GN=Kpna2 PE=1 SV=2;tr|Q641N9|Q641N9_MOUSE Importin subunit alpha OS=Mus musculus OX=10090 GN=Kp	6	10	10	27.6	57.927	529	87.484	27.6	23.3	356390000	196660000	0.551811
Q0PD65;P53994;Q8BXY4;Q6PDZ3;Q3TEG7;Q0PD64;P59279;Q9DB48;Q5U628;G3UXQ7;G3V022;Q6P7T7;A0A1D5RMH1;S4R232	Rab2A	Rab2a Rab2 Rab2A	tr|Q0PD65|Q0PD65_MOUSE Rab2A OS=Mus musculus OX=10090 GN=Rab2a PE=1 SV=1;sp|P53994|RAB2A_MOUSE Ras-related protein Rab-2A OS=Mus musculus OX=10090 GN=Rab2a PE=1 SV=1;tr|Q8BXY4|Q8BXY4_MOUSE Uncharacterized protein OS=Mus musculus OX=10090 GN=Rab2a PE=2 SV=1	14	10	10	56.1	23.547	212	109.73	56.1	44.8	539360000	992830000	1.84076
Q9CT23;Q3UIG0;P60229;Q6LCK2	PCI domain-containing protein (Fragment)	Eif3e Eif3s6	tr|Q9CT23|Q9CT23_MOUSE PCI domain-containing protein (Fragment) OS=Mus musculus OX=10090 GN=Eif3e PE=2 SV=1;tr|Q3UIG0|Q3UIG0_MOUSE Eukaryotic translation initiation factor 3 subunit E OS=Mus musculus OX=10090 GN=Eif3e PE=1 SV=1;sp|P60229|EIF3E_MOUSE Eukary	4	10	10	26.3	49.567	422	68.979	26.3	13.3	1225200000	453190000	0.369891
Q5NTY0;Q3TK61;P63037;B1AXY1;B1AXY0;B1AXX9	DnaJ (Hsp40) homolog, subfamily A, member 1	Dnaja1	tr|Q5NTY0|Q5NTY0_MOUSE DnaJ (Hsp40) homolog, subfamily A, member 1 OS=Mus musculus OX=10090 GN=Dnaja1 PE=1 SV=1;tr|Q3TK61|Q3TK61_MOUSE Uncharacterized protein OS=Mus musculus OX=10090 GN=Dnaja1 PE=2 SV=1;sp|P63037|DNJA1_MOUSE DnaJ homolog subfamily A membe	6	10	10	37.3	44.868	397	75.233	37.3	26.4	737080000	633690000	0.85973
P67778;Q5SQG5;Q3TV00;Q3V2K0	Prohibitin (B-cell receptor-associated protein 32) (BAP 32)	Phb	sp|P67778|PHB_MOUSE Prohibitin OS=Mus musculus OX=10090 GN=Phb PE=1 SV=1;tr|Q5SQG5|Q5SQG5_MOUSE Prohibitin (Fragment) OS=Mus musculus OX=10090 GN=Phb PE=1 SV=1;tr|Q3TV00|Q3TV00_MOUSE Prohibitin (Fragment) OS=Mus musculus OX=10090 GN=Phb PE=2 SV=1	4	10	10	44.9	29.82	272	108.29	7.4	44.9	100670000	1582100000	15.7157
Q3ULG5;Q542I2;Q3UC10;P97311;Q8C5L1	DNA helicase (EC 3.6.4.12)	Mcm6	tr|Q3ULG5|Q3ULG5_MOUSE DNA helicase OS=Mus musculus OX=10090 GN=Mcm6 PE=1 SV=1;tr|Q542I2|Q542I2_MOUSE DNA helicase OS=Mus musculus OX=10090 GN=Mcm6 PE=1 SV=1;tr|Q3UC10|Q3UC10_MOUSE DNA helicase OS=Mus musculus OX=10090 GN=Mcm6 PE=2 SV=1;sp|P97311|MCM6_MOUS	5	10	10	14.6	89.783	794	75.62	9.9	13.4	120260000	340740000	2.83336
Q564F3;Q3UAC2;Q3U5P8;P97351;Q9D1S3;Q3UJU5	40S ribosomal protein S3a	Rps3a1 RPS3A Rps3a	tr|Q564F3|Q564F3_MOUSE 40S ribosomal protein S3a OS=Mus musculus OX=10090 GN=Rps3a1 PE=1 SV=1;tr|Q3UAC2|Q3UAC2_MOUSE 40S ribosomal protein S3a OS=Mus musculus OX=10090 GN=Rps3a1 PE=2 SV=1;tr|Q3U5P8|Q3U5P8_MOUSE 40S ribosomal protein S3a OS=Mus musculus OX=	6	10	10	42	29.885	264	77.45	42	42	848640000	2255800000	2.65814
T2HRB1;Q792F9;Q6NV53;Q00651;Q3U0V9;Q8BQ25;Q3U1F2;Q78E20	Integrin alpha4B	Itga4 Itga4B	tr|T2HRB1|T2HRB1_MOUSE Integrin alpha4B OS=Mus musculus OX=10090 GN=Itga4 PE=2 SV=1;tr|Q792F9|Q792F9_MOUSE Alpha-4 integrin OS=Mus musculus OX=10090 GN=Itga4 PE=1 SV=1;tr|Q6NV53|Q6NV53_MOUSE Integrin alpha 4 OS=Mus musculus OX=10090 GN=Itga4 PE=2 SV=1;sp|Q	8	10	10	13.7	111.66	1004	77.25	13.7	8.5	1040500000	158520000	0.15235
Q3V199;Q91VK1;Q2L4X1;Q3TRM2;A0A1Y7VKZ4;A0A1Y7VJ43;A0A1Y7VM24;A0A1Y7VM47;Q6PDC5;A0A1Y7VIU9	W2 domain-containing protein (Fragment)	Bzw2	tr|Q3V199|Q3V199_MOUSE W2 domain-containing protein (Fragment) OS=Mus musculus OX=10090 GN=Bzw2 PE=2 SV=1;sp|Q91VK1|BZW2_MOUSE Basic leucine zipper and W2 domain-containing protein 2 OS=Mus musculus OX=10090 GN=Bzw2 PE=1 SV=1;sp|Q2L4X1|BZW2_MUSMM Basic leu	10	10	10	23.8	42.773	374	68.978	23.8	18.7	199020000	345390000	1.73545
Q3U6V5;Q3TL10;Q3TF02;Q3TDF8;Q8BWY3;P70199	Eukaryotic peptide chain release factor subunit 1	Etf1	tr|Q3U6V5|Q3U6V5_MOUSE Eukaryotic peptide chain release factor subunit 1 OS=Mus musculus OX=10090 GN=Etf1 PE=2 SV=1;tr|Q3TL10|Q3TL10_MOUSE Eukaryotic peptide chain release factor subunit 1 OS=Mus musculus OX=10090 GN=Etf1 PE=2 SV=1;tr|Q3TF02|Q3TF02_MOUSE E	6	10	10	26.4	43.571	387	84.621	26.4	22.7	406900000	95736000	0.235281
Q3TIC8;Q9CZ13;Q3THM1;Q8K2S8;Q8VEJ2;A0A0A6YWX6;A0A0A6YW82	Uncharacterized protein	Uqcrc1	tr|Q3TIC8|Q3TIC8_MOUSE Uncharacterized protein OS=Mus musculus OX=10090 GN=Uqcrc1 PE=2 SV=1;sp|Q9CZ13|QCR1_MOUSE Cytochrome b-c1 complex subunit 1, mitochondrial OS=Mus musculus OX=10090 GN=Uqcrc1 PE=1 SV=2;tr|Q3THM1|Q3THM1_MOUSE Uncharacterized protein OS	7	10	10	30.8	52.752	480	92.511	9.4	30.8	28493000	1002400000	35.1806
Q8C292;Q8C1V4;Q3TIV6;Q8CFK5;Q8R2P8;Q99MN1	Lysine--tRNA ligase (EC 6.1.1.6) (Lysyl-tRNA synthetase)	Kars	tr|Q8C292|Q8C292_MOUSE Lysine--tRNA ligase OS=Mus musculus OX=10090 GN=Kars PE=2 SV=1;tr|Q8C1V4|Q8C1V4_MOUSE Lysine--tRNA ligase OS=Mus musculus OX=10090 GN=Kars PE=2 SV=1;tr|Q3TIV6|Q3TIV6_MOUSE Lysine--tRNA ligase OS=Mus musculus OX=10090 GN=Kars PE=1 SV=	6	10	10	19.3	67.883	595	70.206	19.3	16.8	792840000	315320000	0.39771
Q3TQP7;Q8QZT1	Uncharacterized protein	Acat1	tr|Q3TQP7|Q3TQP7_MOUSE Uncharacterized protein OS=Mus musculus OX=10090 GN=Acat1 PE=2 SV=1;sp|Q8QZT1|THIL_MOUSE Acetyl-CoA acetyltransferase, mitochondrial OS=Mus musculus OX=10090 GN=Acat1 PE=1 SV=1	2	10	10	34.7	44.802	424	71.064	25.2	34.7	374330000	970640000	2.59301
Q3TWN8;Q9Z110;Q3UZ27;Q3UGW8	Delta-1-pyrroline-5-carboxylate synthase [Includes: Glutamate 5-kinase (GK) (EC 2.7.2.11) (Gamma-glutamyl kinase); Gamma-glutamyl phosphate reductase (GPR) (EC 1.2.1.41) (Glutamate-5-semialdehyde dehydrogenase) (Glutamyl-gamma-semialdehyde dehydrogenase)]	Aldh18a1	tr|Q3TWN8|Q3TWN8_MOUSE Delta-1-pyrroline-5-carboxylate synthase OS=Mus musculus OX=10090 GN=Aldh18a1 PE=2 SV=1;sp|Q9Z110|P5CS_MOUSE Delta-1-pyrroline-5-carboxylate synthase OS=Mus musculus OX=10090 GN=Aldh18a1 PE=1 SV=2;tr|Q3UZ27|Q3UZ27_MOUSE Uncharacteriz	4	10	10	14.2	87.262	795	64.101	4.7	14.2	63204000	272550000	4.31223
Q9ESU7;Q3UFR4;Q5U647;P51912	Amino acid transporter	Slc1a5	tr|Q9ESU7|Q9ESU7_MOUSE Amino acid transporter OS=Mus musculus OX=10090 GN=Slc1a5 PE=1 SV=1;tr|Q3UFR4|Q3UFR4_MOUSE Amino acid transporter OS=Mus musculus OX=10090 GN=Slc1a5 PE=2 SV=1;tr|Q5U647|Q5U647_MOUSE Amino acid transporter OS=Mus musculus OX=10090 GN=	4	10	10	23.6	58.422	555	114.37	19.5	23.6	3843300000	884310000	0.230091
Q8BTJ1;Q543K5;Q3ULZ3;Q99K85;Q3U6K9;Q99JU9;E9Q6P1	Phosphoserine aminotransferase (EC 2.6.1.52)	Psat1	tr|Q8BTJ1|Q8BTJ1_MOUSE Phosphoserine aminotransferase OS=Mus musculus OX=10090 GN=Psat1 PE=2 SV=1;tr|Q543K5|Q543K5_MOUSE Phosphoserine aminotransferase OS=Mus musculus OX=10090 GN=Psat1 PE=1 SV=1;tr|Q3ULZ3|Q3ULZ3_MOUSE Phosphoserine aminotransferase OS=Mus	7	10	10	31.9	40.473	370	69.373	31.9	26.5	548400000	248060000	0.452334
Q4FK57;Q8R180;Q4FJZ3;Q3TXL0;A0A2I3BPM1;Q14DR9;A0A1Y7VJM4;A0A1Y7VNF4;Q8R2E9	Ero1l protein	Ero1a Ero1l	tr|Q4FK57|Q4FK57_MOUSE Ero1l protein OS=Mus musculus OX=10090 GN=Ero1a PE=1 SV=1;sp|Q8R180|ERO1A_MOUSE ERO1-like protein alpha OS=Mus musculus OX=10090 GN=Ero1a PE=1 SV=2;tr|Q4FJZ3|Q4FJZ3_MOUSE Ero1l protein OS=Mus musculus OX=10090 GN=Ero1a PE=2 SV=1;tr|Q	9	10	10	29.7	54.084	464	81.784	14	29.7	278040000	546870000	1.96688
Q543H0;Q64674;Q8BSZ8;Q3UJL7	Uncharacterized protein	Srm	tr|Q543H0|Q543H0_MOUSE Uncharacterized protein OS=Mus musculus OX=10090 GN=Srm PE=1 SV=1;sp|Q64674|SPEE_MOUSE Spermidine synthase OS=Mus musculus OX=10090 GN=Srm PE=1 SV=1;tr|Q8BSZ8|Q8BSZ8_MOUSE PABS domain-containing protein OS=Mus musculus OX=10090 GN=Sr	4	10	10	52	33.995	302	88.816	52	24.2	617800000	90614000	0.146672
Q6NS46;Q3TUH3	Protein RRP5 homolog (Apoptosis-linked gene 4 protein) (Programmed cell death protein 11)	Pdcd11 Alg4 Kiaa0185	sp|Q6NS46|RRP5_MOUSE Protein RRP5 homolog OS=Mus musculus OX=10090 GN=Pdcd11 PE=1 SV=2	2	10	10	7.9	207.78	1862	80.11	1	7.9	1580100	329440000	208.493
Q6ZWN5;F7CJS8;D3YWH9;Q96EC0;Q9CXW7;D3Z673;D3YUV6	40S ribosomal protein S9	Rps9	sp|Q6ZWN5|RS9_MOUSE 40S ribosomal protein S9 OS=Mus musculus OX=10090 GN=Rps9 PE=1 SV=3;tr|F7CJS8|F7CJS8_MOUSE 40S ribosomal protein S9 (Fragment) OS=Mus musculus OX=10090 GN=Rps9 PE=1 SV=1;tr|D3YWH9|D3YWH9_MOUSE 40S ribosomal protein S9 OS=Mus musculus OX	7	10	10	39.2	22.591	194	66.205	35.6	39.2	1086000000	3670500000	3.37983
Q6ZWX6;Q9CV24	Eukaryotic translation initiation factor 2 subunit 1 (Eukaryotic translation initiation factor 2 subunit alpha) (eIF-2-alpha) (eIF-2A) (eIF-2alpha)	Eif2s1 Eif2a	sp|Q6ZWX6|IF2A_MOUSE Eukaryotic translation initiation factor 2 subunit 1 OS=Mus musculus OX=10090 GN=Eif2s1 PE=1 SV=3;tr|Q9CV24|Q9CV24_MOUSE Uncharacterized protein (Fragment) OS=Mus musculus OX=10090 GN=Eif2s1 PE=2 SV=1	2	10	10	38.7	36.108	315	88.186	38.7	34	576250000	457860000	0.794551
Q8BFR5;A0A0U1RNQ6;A0A0U1RPC4	Elongation factor Tu, mitochondrial	Tufm	sp|Q8BFR5|EFTU_MOUSE Elongation factor Tu, mitochondrial OS=Mus musculus OX=10090 GN=Tufm PE=1 SV=1;tr|A0A0U1RNQ6|A0A0U1RNQ6_MOUSE Elongation factor Tu, mitochondrial (Fragment) OS=Mus musculus OX=10090 GN=Tufm PE=1 SV=1	3	10	10	24.3	49.508	452	81.697	10.8	24.3	49172000	456030000	9.27418
Q8BK67;A2AWQ2	Protein RCC2	Rcc2 Kiaa1470	sp|Q8BK67|RCC2_MOUSE Protein RCC2 OS=Mus musculus OX=10090 GN=Rcc2 PE=1 SV=1	2	10	10	25	55.983	520	124.33	25	24.8	1987800000	885760000	0.445598
Q91YN3;Q8BW44;Q9QUJ7	Acyl-CoA synthetase long-chain family member 4	Acsl4	tr|Q91YN3|Q91YN3_MOUSE Acyl-CoA synthetase long-chain family member 4 OS=Mus musculus OX=10090 GN=Acsl4 PE=2 SV=1;tr|Q8BW44|Q8BW44_MOUSE AMP-binding domain-containing protein OS=Mus musculus OX=10090 GN=Acsl4 PE=2 SV=1;sp|Q9QUJ7|ACSL4_MOUSE Long-chain-fatt	3	10	10	23.3	74.338	670	69.974	23.3	21.8	278710000	403670000	1.44835
Q8C4J7;Q8CE86;A0JLN6;F6YAR3	Transducin beta-like protein 3	Tbl3	sp|Q8C4J7|TBL3_MOUSE Transducin beta-like protein 3 OS=Mus musculus OX=10090 GN=Tbl3 PE=2 SV=1;tr|Q8CE86|Q8CE86_MOUSE WD_REPEATS_REGION domain-containing protein OS=Mus musculus OX=10090 GN=Tbl3 PE=2 SV=1;tr|A0JLN6|A0JLN6_MOUSE Tbl3 protein (Fragment) OS=M	4	10	10	16.4	88.265	801	72.819	12.5	15.2	164060000	241990000	1.47501
Q91V55;D3YYM6;D3Z1S8;P97461	40S ribosomal protein S5 (Ribosomal protein S5)	Rps5	tr|Q91V55|Q91V55_MOUSE 40S ribosomal protein S5 OS=Mus musculus OX=10090 GN=Rps5 PE=1 SV=1;tr|D3YYM6|D3YYM6_MOUSE 40S ribosomal protein S5 (Fragment) OS=Mus musculus OX=10090 GN=Rps5 PE=1 SV=1;tr|D3Z1S8|D3Z1S8_MOUSE 40S ribosomal protein S5 (Fragment) OS=M	4	10	10	49.5	22.876	204	71.683	49.5	49.5	1541700000	2420100000	1.56976
Q923G3;A2AMW0;Q3TVK4;Q3TRH8;P47757;F7CAZ6;A0A0A0MQI9;F6YHZ8;P97856;Q9D9A5	F-actin-capping protein subunit beta	Capzb	tr|Q923G3|Q923G3_MOUSE F-actin-capping protein subunit beta OS=Mus musculus OX=10090 GN=Capzb PE=2 SV=1;tr|A2AMW0|A2AMW0_MOUSE F-actin-capping protein subunit beta OS=Mus musculus OX=10090 GN=Capzb PE=1 SV=1;tr|Q3TVK4|Q3TVK4_MOUSE F-actin-capping protein s	10	10	10	41.2	30.628	272	74.793	37.1	33.8	390840000	249220000	0.637652
Q9QZE5;Q7TNQ1	Coatomer subunit gamma-1 (Gamma-1-coat protein) (Gamma-1-COP)	Copg1 Copg	sp|Q9QZE5|COPG1_MOUSE Coatomer subunit gamma-1 OS=Mus musculus OX=10090 GN=Copg1 PE=1 SV=1	2	12	10	18.4	97.512	874	94.579	15.4	18.4	573400000	557830000	0.972846
Q9Z1F9;H3BLR3;H3BLM2	SUMO-activating enzyme subunit 2 (EC 2.3.2.-) (Anthracycline-associated resistance ARX) (Ubiquitin-like 1-activating enzyme E1B) (Ubiquitin-like modifier-activating enzyme 2)	Uba2 Sae2 Uble1b	sp|Q9Z1F9|SAE2_MOUSE SUMO-activating enzyme subunit 2 OS=Mus musculus OX=10090 GN=Uba2 PE=1 SV=1	3	10	10	23	70.568	638	91.872	23	19.1	489240000	452990000	0.925905
Q1A602;Q3ULT2;Q3UDJ7;A0A1L1SV25;P57780;E9Q2W9;Q8BP35;A0A1L1SVJ6;Q61064;D3Z761;D3Z0L8;Q8K3Q4;Q9JI91;Q61063;Q5FW75	Non-muscle alpha-actinin 4	Actn4	tr|Q1A602|Q1A602_MOUSE Non-muscle alpha-actinin 4 OS=Mus musculus OX=10090 GN=Actn4 PE=2 SV=1;tr|Q3ULT2|Q3ULT2_MOUSE Non-muscle alpha-actinin 4 OS=Mus musculus OX=10090 GN=Actn4 PE=1 SV=1;tr|Q3UDJ7|Q3UDJ7_MOUSE Uncharacterized protein OS=Mus musculus OX=10	15	12	9	16.5	104.91	911	79.714	16.5	11.3	237360000	216740000	0.913128
D3Y272;F8VQC9;I1VGT5;I1VGT4;J9RZB2;A0A286YCX2;J7H931;A0A286YCS4;J9RV59;Q8BTY2;D3Y273;H6WZ45;E3UVT8;I1VGT6;H6WZF5;J9RDH0;J9S4N6;A0A286YD46;A0A286YDJ7;U3RKD2;E3UVT9;U3RF68;A0A286YCX8;J9S7F7;A0A286YDK8;A0A286YDR1;Q8BWZ4;Q8C943;B1AWV9;J7H264;R4H243;Q8JZR6;Q5DTL9	Anion exchange protein	Slc4a7	tr|D3Y272|D3Y272_MOUSE Anion exchange protein OS=Mus musculus OX=10090 GN=Slc4a7 PE=1 SV=1;tr|F8VQC9|F8VQC9_MOUSE Anion exchange protein OS=Mus musculus OX=10090 GN=Slc4a7 PE=1 SV=1;tr|I1VGT5|I1VGT5_MOUSE Anion exchange protein OS=Mus musculus OX=10090 GN=	33	9	9	10.8	125.71	1118	63.226	9.7	8.6	221290000	97395000	0.440124
A0A2I3BRL8;Q91VM5;Q9WV02;A2AFI3;A2AFI4;S4R1F6;A0A2I3BQC0;E9QM14;A0A1X7SB71;Q9JIY2	Predicted gene 7324	Gm7324	tr|A0A2I3BRL8|A0A2I3BRL8_MOUSE Predicted gene 7324 OS=Mus musculus OX=10090 GN=Gm7324 PE=4 SV=1;sp|Q91VM5|RMXL1_MOUSE RNA binding motif protein, X-linked-like-1 OS=Mus musculus OX=10090 GN=Rbmxl1 PE=2 SV=1;sp|Q9WV02|RBMX_MOUSE RNA-binding motif protein, X	10	11	9	26	42.178	388	84.696	16.2	24.2	225330000	1108400000	4.91901
A0A3B2WDD2;A0A3B2WBL1;Q5XJF6;Q3U561;P53026;A0A3B2W824;A0A3B2W820;Q99JL6;A0A3B2WCA5;D6RE43	Ribosomal protein	Rpl10a	tr|A0A3B2WDD2|A0A3B2WDD2_MOUSE Ribosomal protein OS=Mus musculus OX=10090 GN=Rpl10a PE=1 SV=1;tr|A0A3B2WBL1|A0A3B2WBL1_MOUSE Ribosomal protein OS=Mus musculus OX=10090 GN=Rpl10a PE=1 SV=1;tr|Q5XJF6|Q5XJF6_MOUSE Ribosomal protein OS=Mus musculus OX=10090 GN	10	9	9	42.6	21.636	190	80.277	38.4	42.6	3371300000	3090600000	0.916738
A2AFQ9;E9PUU4;Q8BX17;Q6KAS0;B2RQ83;B7ZN04;Q3TR97	Gem-associated protein 5	Gemin5	tr|A2AFQ9|A2AFQ9_MOUSE Gem-associated protein 5 OS=Mus musculus OX=10090 GN=Gemin5 PE=1 SV=1;tr|E9PUU4|E9PUU4_MOUSE Gem-associated protein 5 OS=Mus musculus OX=10090 GN=Gemin5 PE=1 SV=1;sp|Q8BX17|GEMI5_MOUSE Gem-associated protein 5 OS=Mus musculus OX=1009	7	9	9	7.3	166.52	1501	60.094	0.6	7.3	24807000	232720000	9.38122
A3KFU5;Q99LF8;Q6PHQ9;Q91YZ8;A3KFU8;Q3UX16;V9GXG3;Q3TSA5;Q3TUS5	Polyadenylate-binding protein (PABP)	Pabpc4	tr|A3KFU5|A3KFU5_MOUSE Polyadenylate-binding protein OS=Mus musculus OX=10090 GN=Pabpc4 PE=1 SV=1;tr|Q99LF8|Q99LF8_MOUSE Polyadenylate-binding protein OS=Mus musculus OX=10090 GN=Pabpc4 PE=2 SV=1;tr|Q6PHQ9|Q6PHQ9_MOUSE Polyadenylate-binding protein OS=Mus	9	14	9	25.4	69.43	631	74.198	25.4	18.9	275670000	301830000	1.0949
A4FUS1;Q641N3;Q5CZY9;P14131	Rps16 protein	Rps16	tr|A4FUS1|A4FUS1_MOUSE Rps16 protein OS=Mus musculus OX=10090 GN=Rps16 PE=1 SV=1;tr|Q641N3|Q641N3_MOUSE Rps16 protein (Fragment) OS=Mus musculus OX=10090 GN=Rps16 PE=2 SV=1;tr|Q5CZY9|Q5CZY9_MOUSE Rps16 protein OS=Mus musculus OX=10090 GN=Rps16 PE=2 SV=1;sp	4	9	9	49.3	16.445	146	61.593	41.8	49.3	1301300000	1686400000	1.29593
B1AWE0;Q6PFA2;B1AWE1;B1AWD8;B1AWD9;O08585;Q3THU7	Clathrin light chain	Clta	tr|B1AWE0|B1AWE0_MOUSE Clathrin light chain OS=Mus musculus OX=10090 GN=Clta PE=1 SV=1;tr|Q6PFA2|Q6PFA2_MOUSE Clathrin light chain OS=Mus musculus OX=10090 GN=Clta PE=1 SV=1;tr|B1AWE1|B1AWE1_MOUSE Clathrin light chain OS=Mus musculus OX=10090 GN=Clta PE=1	7	9	9	33.8	23.478	216	96.647	33.8	30.6	9568800000	4344400000	0.454017
Q9R200;B7ZN92;Q9WTV4;Q3TB85;Q3T9N8;E9QNL8;B7ZN91;Q3U159;H2ELL3;E9Q5M7;B7ZN90;D3Z627;P24063;D3YW95;Q3URE4	Integrin alpha L	Itgal	tr|Q9R200|Q9R200_MOUSE Integrin alpha L OS=Mus musculus OX=10090 GN=Itgal PE=2 SV=1;tr|B7ZN92|B7ZN92_MOUSE Integrin alpha L OS=Mus musculus OX=10090 GN=Itgal PE=2 SV=1;tr|Q9WTV4|Q9WTV4_MOUSE Integrin alpha L OS=Mus musculus OX=10090 GN=Itgal PE=2 SV=1;tr|Q	15	9	9	9	128.13	1160	63.181	9	5.5	180960000	100440000	0.55504
E9PWC8;E9PZR3;Q3V141;Q61183;E9QAN2;A0A0R4J244;A1L349;Q9WVP6;E9QAY4;F6VTN8;F7CXD5;F7DC29;E9PVN7;Q8BY05;Q6PCL9	Poly(A) polymerase (EC 2.7.7.19)	Papola	tr|E9PWC8|E9PWC8_MOUSE Poly(A) polymerase OS=Mus musculus OX=10090 GN=Papola PE=1 SV=1;tr|E9PZR3|E9PZR3_MOUSE Poly(A) polymerase OS=Mus musculus OX=10090 GN=Papola PE=1 SV=1;tr|Q3V141|Q3V141_MOUSE Polynucleotide adenylyltransferase (Fragment) OS=Mus muscul	15	9	9	15.9	77.519	693	56.934	14.7	14	168030000	87384000	0.52005
Q3TQL4;E9Q800;Q3U7N2;Q3TVZ5;Q8CAQ8;E9QAY6;Q3TEY5;Q2YDW0;A0A0U1RP81;A0A0U1RQ14;Q6P8Y5;A0A1B0GX08;Q3TZK4;A6H604	MICOS complex subunit MIC60 (Mitofilin) (Fragment)	Immt	tr|Q3TQL4|Q3TQL4_MOUSE MICOS complex subunit MIC60 (Fragment) OS=Mus musculus OX=10090 GN=Immt PE=2 SV=1;tr|E9Q800|E9Q800_MOUSE MICOS complex subunit MIC60 OS=Mus musculus OX=10090 GN=Immt PE=1 SV=1;tr|Q3U7N2|Q3U7N2_MOUSE MICOS complex subunit MIC60 OS=Mus	14	9	9	16.9	75.472	679	56.238	0	16.9	0	241830000	#DIV/0!
G3X956;Q920B9	FACT complex subunit	Supt16 Supt16h	tr|G3X956|G3X956_MOUSE FACT complex subunit OS=Mus musculus OX=10090 GN=Supt16 PE=1 SV=1;sp|Q920B9|SP16H_MOUSE FACT complex subunit SPT16 OS=Mus musculus OX=10090 GN=Supt16h PE=1 SV=2	2	9	9	11	119.84	1047	67.227	8.7	11	160720000	308590000	1.92005
G3X9B1;Q8BLJ4;Q3T9I0;Q3V1X6;A0A1Y7VNI1;Q3TMK0;Q3TNE1;Q3UNW7;A0A1Y7VNG8;Q8VCK1;Q8CCT5	HEAT repeat-containing protein 1	Heatr1	tr|G3X9B1|G3X9B1_MOUSE HEAT repeat-containing protein 1 OS=Mus musculus OX=10090 GN=Heatr1 PE=1 SV=1	11	9	9	5	242.07	2143	58.83	0.5	5	5917000	237320000	40.1082
Q5JC28;Q80ZL3;H3BK65;P42567;F6W2Q5;A0A0R4J0A0;H3BJB8	Epidermal growth factor receptor pathway substrate 15 isoform B (Epidermal growth factor receptor substrate 15)	Eps15	tr|Q5JC28|Q5JC28_MOUSE Epidermal growth factor receptor pathway substrate 15 isoform B OS=Mus musculus OX=10090 GN=Eps15 PE=1 SV=1;tr|Q80ZL3|Q80ZL3_MOUSE Epidermal growth factor receptor pathway substrate 15 OS=Mus musculus OX=10090 GN=Eps15 PE=2 SV=2;tr|H	7	9	9	16.3	86.677	793	57.086	16.3	9.6	133260000	92947000	0.697486
Q6GT24;Q53ZU7;O08709;D3Z0Y2;Q6A0D0;Q8BPD3;Q8BG37;A0A0A6YXQ7	Peroxiredoxin-6 (EC 1.11.1.27)	Prdx6	tr|Q6GT24|Q6GT24_MOUSE Peroxiredoxin-6 OS=Mus musculus OX=10090 GN=Prdx6 PE=1 SV=1;tr|Q53ZU7|Q53ZU7_MOUSE Peroxiredoxin 6 OS=Mus musculus OX=10090 GN=Prdx6 PE=2 SV=1;sp|O08709|PRDX6_MOUSE Peroxiredoxin-6 OS=Mus musculus OX=10090 GN=Prdx6 PE=1 SV=3;tr|D3Z0Y	8	9	9	53.6	24.826	224	82.828	53.6	36.6	536890000	267410000	0.498072
Q545K4;Q3UA13;Q3U818;O55135;Q9R071;Q3UBJ6;Q3U740;A6PWZ2;D6RG53;D6RJJ3;B1AZQ4	Eukaryotic translation initiation factor 6 (eIF-6)	Eif6 EIF6 ITGB4BP Itgb4bp	tr|Q545K4|Q545K4_MOUSE Eukaryotic translation initiation factor 6 OS=Mus musculus OX=10090 GN=Eif6 PE=1 SV=1;tr|Q3UA13|Q3UA13_MOUSE Eukaryotic translation initiation factor 6 OS=Mus musculus OX=10090 GN=Eif6 PE=2 SV=1;tr|Q3U818|Q3U818_MOUSE Eukaryotic tran	11	9	9	56.7	26.511	245	85.81	52.7	44.5	598260000	318430000	0.53226
P0DP28;P0DP27;P0DP26;Q3UKW2;A0A3Q4EHJ0;Q9D6P8;A0A1Y7VK66;G3UX57	Calmodulin-3	Calm3 Cam3 Camc	sp|P0DP28|CALM3_MOUSE Calmodulin-3 OS=Mus musculus OX=10090 GN=Calm3 PE=1 SV=1;sp|P0DP27|CALM2_MOUSE Calmodulin-2 OS=Mus musculus OX=10090 GN=Calm2 PE=1 SV=1;sp|P0DP26|CALM1_MOUSE Calmodulin-1 OS=Mus musculus OX=10090 GN=Calm1 PE=1 SV=1;tr|Q3UKW2|Q3UKW2_MO	8	9	9	55.7	16.837	149	101.18	55.7	53	1394800000	958330000	0.687073
Q3UAX2;Q8C562;Q3UCZ2;Q3UC81;Q3UB98;Q3UB54;Q3U841;Q3U784;Q3U5U0;P11152;Q4FJQ8;Q3UCD4;Q3UCH4;Q3UC44;Q3UBE9;Q3U715;Q3U6S8;Q3U9P4;Q3U831	Lipoprotein lipase (LPL) (EC 3.1.1.34)	Lpl	tr|Q3UAX2|Q3UAX2_MOUSE Lipoprotein lipase OS=Mus musculus OX=10090 GN=Lpl PE=2 SV=1;tr|Q8C562|Q8C562_MOUSE Lipoprotein lipase OS=Mus musculus OX=10090 GN=Lpl PE=2 SV=1;tr|Q3UCZ2|Q3UCZ2_MOUSE Lipoprotein lipase OS=Mus musculus OX=10090 GN=Lpl PE=2 SV=1;tr|Q	19	9	9	29.3	52.025	464	86.389	29.3	12.1	1135400000	97159000	0.0855725
Q99JW7;P11440;Q8R4A4;D3Z2T9	Cdc2a protein (Fragment)	Cdk1 Cdc2a	tr|Q99JW7|Q99JW7_MOUSE Cdc2a protein (Fragment) OS=Mus musculus OX=10090 GN=Cdk1 PE=2 SV=1;sp|P11440|CDK1_MOUSE Cyclin-dependent kinase 1 OS=Mus musculus OX=10090 GN=Cdk1 PE=1 SV=3;tr|Q8R4A4|Q8R4A4_MOUSE Cell cycle p34 CDC2 kinase protein (Fragment) OS=Mus	4	10	9	39.3	33.832	295	75.343	39.3	28.5	604860000	319060000	0.527494
Q3TB10;Q4FK06;Q3UE52;Q3UDJ5;Q3UAU5;Q3U8M7;Q3U7T2;Q3U7Q9;Q3THH5;Q3TB21;P13597;Q922B3;Q3UDC5	Ig-like domain-containing protein (Fragment)	Icam1	tr|Q3TB10|Q3TB10_MOUSE Ig-like domain-containing protein (Fragment) OS=Mus musculus OX=10090 GN=Icam1 PE=2 SV=1;tr|Q4FK06|Q4FK06_MOUSE Icam1 protein OS=Mus musculus OX=10090 GN=Icam1 PE=2 SV=1;tr|Q3UE52|Q3UE52_MOUSE Ig-like domain-containing protein OS=Mus	13	9	9	21	51.331	466	81.891	21	21	770930000	560490000	0.727031
Q3UHZ3;Q7TSJ0;P13864;J3QNW0;Q3UPE8;Q3UWN4	DNA (cytosine-5)-methyltransferase (EC 2.1.1.37)	Dnmt1	tr|Q3UHZ3|Q3UHZ3_MOUSE DNA (cytosine-5)-methyltransferase OS=Mus musculus OX=10090 GN=Dnmt1 PE=2 SV=1;tr|Q7TSJ0|Q7TSJ0_MOUSE DNA (cytosine-5)-methyltransferase OS=Mus musculus OX=10090 GN=Dnmt1 PE=2 SV=1;sp|P13864|DNMT1_MOUSE DNA (cytosine-5)-methyltransfe	6	9	9	7.2	183.31	1619	59.707	3.4	6.4	168060000	269300000	1.6024
Q6PEE6;Q3U7X9;Q69ZW4;P17427	AP-2 complex subunit alpha	Ap2a2	tr|Q6PEE6|Q6PEE6_MOUSE AP-2 complex subunit alpha OS=Mus musculus OX=10090 GN=Ap2a2 PE=2 SV=1;tr|Q3U7X9|Q3U7X9_MOUSE AP-2 complex subunit alpha OS=Mus musculus OX=10090 GN=Ap2a2 PE=2 SV=1;tr|Q69ZW4|Q69ZW4_MOUSE MKIAA0899 protein (Fragment) OS=Mus musculus	4	12	9	16	104	938	54.793	12.7	11.3	224170000	244490000	1.09065
Q3UFK0;Q3TSZ8;Q3TI59;P21995	Uncharacterized protein	Emb	tr|Q3UFK0|Q3UFK0_MOUSE Uncharacterized protein OS=Mus musculus OX=10090 GN=Emb PE=2 SV=1;tr|Q3TSZ8|Q3TSZ8_MOUSE Uncharacterized protein OS=Mus musculus OX=10090 GN=Emb PE=2 SV=1;tr|Q3TI59|Q3TI59_MOUSE Uncharacterized protein OS=Mus musculus OX=10090 GN=Emb	4	9	9	27.3	37.03	330	99.346	27.3	24.8	2413600000	1207800000	0.500414
Q3ULD6;Q3UI57;P25206;Q3UZH2	DNA helicase (EC 3.6.4.12)	Mcm3	tr|Q3ULD6|Q3ULD6_MOUSE DNA helicase OS=Mus musculus OX=10090 GN=Mcm3 PE=2 SV=1;tr|Q3UI57|Q3UI57_MOUSE DNA helicase OS=Mus musculus OX=10090 GN=Mcm3 PE=1 SV=1;sp|P25206|MCM3_MOUSE DNA replication licensing factor MCM3 OS=Mus musculus OX=10090 GN=Mcm3 PE=1 S	4	9	9	14.8	91.577	812	65.73	9.2	14.8	66482000	435740000	6.55426
Q58EU3;Q3TXS9;Q3TLE5;P25444;Q3TXR5;Q9DC49;D3YVC1;Q3TL20;Q3TI78;Q3UB36;D3YWJ3;O89072;Q3V2B9	40S ribosomal protein S2	Rps2	tr|Q58EU3|Q58EU3_MOUSE 40S ribosomal protein S2 OS=Mus musculus OX=10090 GN=Rps2 PE=1 SV=1;tr|Q3TXS9|Q3TXS9_MOUSE 40S ribosomal protein S2 OS=Mus musculus OX=10090 GN=Rps2 PE=2 SV=1;tr|Q3TLE5|Q3TLE5_MOUSE 40S ribosomal protein S2 OS=Mus musculus OX=10090 G	13	9	9	34.8	31.231	293	69.887	31.1	34.8	1570100000	3231900000	2.0584
P26443;Q3TSQ7;F7CFA5	Glutamate dehydrogenase 1, mitochondrial (GDH 1) (EC 1.4.1.3)	Glud1 Glud	sp|P26443|DHE3_MOUSE Glutamate dehydrogenase 1, mitochondrial OS=Mus musculus OX=10090 GN=Glud1 PE=1 SV=1;tr|Q3TSQ7|Q3TSQ7_MOUSE Glutamate dehydrogenase (NAD(P)(+)) (Fragment) OS=Mus musculus OX=10090 GN=Glud1 PE=2 SV=1	3	9	9	20.8	61.336	558	79.03	6.1	20.8	67726000	473340000	6.98904
Q3TKP3;Q3TCF4;P28658;Q8BWX1	Ataxin-10	Atxn10 Sca10	tr|Q3TKP3|Q3TKP3_MOUSE Ataxin-10 OS=Mus musculus OX=10090 GN=Atxn10 PE=2 SV=1;tr|Q3TCF4|Q3TCF4_MOUSE Ataxin-10 OS=Mus musculus OX=10090 GN=Atxn10 PE=2 SV=1;sp|P28658|ATX10_MOUSE Ataxin-10 OS=Mus musculus OX=10090 GN=Atxn10 PE=1 SV=2;tr|Q8BWX1|Q8BWX1_MOUSE	4	9	9	27.2	53.71	475	73.185	27.2	20.6	186890000	144150000	0.771309
P35700;B1AXW5;B1AXW6;Q3U9J9;B1AXW4	Peroxiredoxin-1 (EC 1.11.1.24) (Macrophage 23 kDa stress protein) (Osteoblast-specific factor 3) (OSF-3) (Thioredoxin peroxidase 2) (Thioredoxin-dependent peroxide reductase 2) (Thioredoxin-dependent peroxiredoxin 1)	Prdx1 Msp23 Paga Tdpx2	sp|P35700|PRDX1_MOUSE Peroxiredoxin-1 OS=Mus musculus OX=10090 GN=Prdx1 PE=1 SV=1;tr|B1AXW5|B1AXW5_MOUSE Peroxiredoxin-1 (Fragment) OS=Mus musculus OX=10090 GN=Prdx1 PE=1 SV=8;tr|B1AXW6|B1AXW6_MOUSE Peroxiredoxin-1 (Fragment) OS=Mus musculus OX=10090 GN=Pr	5	10	9	54.8	22.176	199	66.963	54.8	50.3	6966400000	4499300000	0.645857
Q9DBX5;Q3UMQ1;P47713;A0A087WPN8	Phospholipase A2 (EC 3.1.1.4)	Pla2g4a	tr|Q9DBX5|Q9DBX5_MOUSE Phospholipase A2 OS=Mus musculus OX=10090 GN=Pla2g4a PE=1 SV=1;tr|Q3UMQ1|Q3UMQ1_MOUSE Phospholipase A2 OS=Mus musculus OX=10090 GN=Pla2g4a PE=1 SV=1;sp|P47713|PA24A_MOUSE Cytosolic phospholipase A2 OS=Mus musculus OX=10090 GN=Pla2g4a	4	9	9	14.6	84.267	740	64.957	8.8	14.6	78070000	486190000	6.22762
P47856;Q3V0X4;Q9Z2Z9	Glutamine--fructose-6-phosphate aminotransferase [isomerizing] 1 (EC 2.6.1.16) (D-fructose-6-phosphate amidotransferase 1) (Glutamine:fructose-6-phosphate amidotransferase 1) (GFAT 1) (GFAT1) (Hexosephosphate aminotransferase 1)	Gfpt1 Gfpt	sp|P47856|GFPT1_MOUSE Glutamine--fructose-6-phosphate aminotransferase [isomerizing] 1 OS=Mus musculus OX=10090 GN=Gfpt1 PE=1 SV=3	3	9	9	16.2	78.538	697	74.395	14.3	16.2	129550000	259580000	2.00371
Q497E9;P62242;Q5M9L9;Q3UJU6;Q9CQW4;Q3UA25;Q9CRJ5	40S ribosomal protein S8	Rps8	tr|Q497E9|Q497E9_MOUSE 40S ribosomal protein S8 OS=Mus musculus OX=10090 GN=Rps8 PE=1 SV=1;sp|P62242|RS8_MOUSE 40S ribosomal protein S8 OS=Mus musculus OX=10090 GN=Rps8 PE=1 SV=2;tr|Q5M9L9|Q5M9L9_MOUSE 40S ribosomal protein S8 OS=Mus musculus OX=10090 GN=R	7	9	9	45.2	24.205	208	99.079	39.9	45.2	506540000	3585000000	7.07743
Q3U9V4;P62880;E9QKR0;D3Z1M1;D3Z1T4;D3YZX3;E9PWM7;Q3U2F9;Q3THF3;P29387;Q3TY18;A0A0A6YVN9;V9GWY1;Q8BMQ1;Q54AE3;Q61011;Q9QWG2	WD_REPEATS_REGION domain-containing protein	Gnb2	tr|Q3U9V4|Q3U9V4_MOUSE WD_REPEATS_REGION domain-containing protein OS=Mus musculus OX=10090 GN=Gnb2 PE=1 SV=1;sp|P62880|GBB2_MOUSE Guanine nucleotide-binding protein G(I)/G(S)/G(T) subunit beta-2 OS=Mus musculus OX=10090 GN=Gnb2 PE=1 SV=3;tr|E9QKR0|E9QKR0_	17	15	9	53.2	37.331	340	144.37	53.2	50	2667700000	1556500000	0.583461
Q544Q7;P97370;Q3U9D4;Q3UFH4;Q1WWL1;Q71VC6	Sodium/potassium-transporting ATPase subunit beta	Atp1b3	tr|Q544Q7|Q544Q7_MOUSE Sodium/potassium-transporting ATPase subunit beta OS=Mus musculus OX=10090 GN=Atp1b3 PE=1 SV=1;sp|P97370|AT1B3_MOUSE Sodium/potassium-transporting ATPase subunit beta-3 OS=Mus musculus OX=10090 GN=Atp1b3 PE=1 SV=1;tr|Q3U9D4|Q3U9D4_MO	6	9	9	45	31.775	278	70.814	45	45	1705000000	1791800000	1.05091
Q7TMN7;P97429;F7ANV6;D3Z0S1;A0A0N4SW89;A0A0N4SV57;Q8BSL2;S4R1F2;Q9R0V2	Annexin	Anxa4	tr|Q7TMN7|Q7TMN7_MOUSE Annexin OS=Mus musculus OX=10090 GN=Anxa4 PE=2 SV=1;sp|P97429|ANXA4_MOUSE Annexin A4 OS=Mus musculus OX=10090 GN=Anxa4 PE=1 SV=4;tr|F7ANV6|F7ANV6_MOUSE Annexin (Fragment) OS=Mus musculus OX=10090 GN=Anxa4 PE=1 SV=1;tr|D3Z0S1|D3Z0S1_M	9	9	9	34.2	35.929	319	90.422	34.2	31.3	700570000	858840000	1.22592
Q6P6I8;P97797;Q2M4I8;E0CX65;A2ANC1;A0A0A6YWR3;Q6F5F1;Q6F5F2;Q6F5F0;B7ZNT3;A0A0A6YYP6	Signal-regulatory protein alpha	Sirpa Ptpns1	tr|Q6P6I8|Q6P6I8_MOUSE Signal-regulatory protein alpha OS=Mus musculus OX=10090 GN=Sirpa PE=1 SV=1;sp|P97797|SHPS1_MOUSE Tyrosine-protein phosphatase non-receptor type substrate 1 OS=Mus musculus OX=10090 GN=Sirpa PE=1 SV=2;tr|Q2M4I8|Q2M4I8_MOUSE Ptpns1 OS	11	9	9	22.8	55.986	509	64.642	22.8	17.3	432860000	416280000	0.961697
Q91VL7;Q3TM70;Q1MWP9;Q1MWP8;Q9EQP2;Q3TWP9;Q3TQ74	EH-domain containing 4	Ehd4	tr|Q91VL7|Q91VL7_MOUSE EH-domain containing 4 OS=Mus musculus OX=10090 GN=Ehd4 PE=2 SV=1;tr|Q3TM70|Q3TM70_MOUSE Uncharacterized protein OS=Mus musculus OX=10090 GN=Ehd4 PE=1 SV=1;tr|Q1MWP9|Q1MWP9_MOUSE EH-domain containing 4 (Fragment) OS=Mus musculus OX=1	7	10	9	20.1	61.492	541	69.466	20.1	15	348040000	154530000	0.444001
Q8BGJ5;Q3T984;Q80T07;Q922I7;Q8K144;Q5RJV5;Q3TQW3;Q8R509;Q3UBR5;Q6NZB8;Q8CB58;Q3U5I2;P17225;Q8C2R5;E9QMW9;Q923A7;E9Q0W3;F7AXP1;E9Q279;F7DCW4	Polypyrimidine tract-binding protein 1	Ptbp1	tr|Q8BGJ5|Q8BGJ5_MOUSE Polypyrimidine tract-binding protein 1 OS=Mus musculus OX=10090 GN=Ptbp1 PE=1 SV=1;tr|Q3T984|Q3T984_MOUSE Polypyrimidine tract-binding protein 1 OS=Mus musculus OX=10090 GN=Ptbp1 PE=2 SV=1;tr|Q80T07|Q80T07_MOUSE Polypyrimidine tract-	20	10	9	24.8	56.891	529	91.297	20	24.8	308800000	1125600000	3.64508
Q3TG12;Q8C644;Q9WUA2;Q9CZU5;Q3TI98;Q3UYC2;Q3TMX6;A0A087WPV4;A0A087WS80;A0A087WQ15	Phenylalanyl-tRNA synthetase beta subunit (EC 6.1.1.20) (Fragment)	Farsb Farslb	tr|Q3TG12|Q3TG12_MOUSE Phenylalanyl-tRNA synthetase beta subunit (Fragment) OS=Mus musculus OX=10090 GN=Farsb PE=2 SV=1;tr|Q8C644|Q8C644_MOUSE Phenylalanyl-tRNA synthetase beta subunit OS=Mus musculus OX=10090 GN=Farsb PE=2 SV=1;sp|Q9WUA2|SYFB_MOUSE Phenyl	10	9	9	20.6	65.565	588	58.816	20.6	10.4	336980000	178390000	0.529379
Q3ULF7;Q3TWJ4;Q3TGW0;Q99JY9;Q3TGE1;A0A087WRA1;A0A087WP86;A0A087WQ14;Q3UGH0;A0A087WS98;A0A087WPR6;A0A087WQ83;Q9ERF8;Q641P0	Actin-like protein 3 (Actin-related protein 3)	Actr3	tr|Q3ULF7|Q3ULF7_MOUSE Actin-like protein 3 OS=Mus musculus OX=10090 GN=Actr3 PE=1 SV=1;tr|Q3TWJ4|Q3TWJ4_MOUSE Actin-like protein 3 OS=Mus musculus OX=10090 GN=Actr3 PE=2 SV=1;tr|Q3TGW0|Q3TGW0_MOUSE Actin-like protein 3 OS=Mus musculus OX=10090 GN=Actr3 PE	14	9	9	35.2	47.357	418	97.801	35.2	29.9	714260000	226890000	0.317657
Q3THQ5;Q60864	Uncharacterized protein	Stip1	tr|Q3THQ5|Q3THQ5_MOUSE Uncharacterized protein OS=Mus musculus OX=10090 GN=Stip1 PE=2 SV=1;sp|Q60864|STIP1_MOUSE Stress-induced-phosphoprotein 1 OS=Mus musculus OX=10090 GN=Stip1 PE=1 SV=1	2	9	9	20.6	62.5	543	59.876	17.1	17.3	463190000	233510000	0.504134
Q3TWZ9;Q3TJ95;Q6IRU5;A2VCP8;F7BHJ0	Clathrin light chain	Cltb	tr|Q3TWZ9|Q3TWZ9_MOUSE Clathrin light chain OS=Mus musculus OX=10090 GN=Cltb PE=2 SV=1;tr|Q3TJ95|Q3TJ95_MOUSE Clathrin light chain OS=Mus musculus OX=10090 GN=Cltb PE=2 SV=1;sp|Q6IRU5|CLCB_MOUSE Clathrin light chain B OS=Mus musculus OX=10090 GN=Cltb PE=1	5	9	9	28	23.174	211	60.371	28	27.5	2910500000	1430300000	0.491428
Q3TT94;Q6P1F6;Q3TPC5;Q571J7;Q9CWU3;Q7TPQ7;Q8BVB4;A0A668KLA9;Q6ZWR4;Q925E7;A0A286YDJ9;A0A494B941;G3UXS9;A0A494B8Z0;F6RV17;Q8BG02	Serine/threonine-protein phosphatase 2A 55 kDa regulatory subunit B	Ppp2r2a	tr|Q3TT94|Q3TT94_MOUSE Serine/threonine-protein phosphatase 2A 55 kDa regulatory subunit B OS=Mus musculus OX=10090 GN=Ppp2r2a PE=1 SV=1;sp|Q6P1F6|2ABA_MOUSE Serine/threonine-protein phosphatase 2A 55 kDa regulatory subunit B alpha isoform OS=Mus musculus	16	9	9	28.2	51.691	447	79.62	28.2	20.8	406570000	113460000	0.279066
Q5BL18;Q4FJT0;Q3TTX0;Q6ZQ61;Q8K310;Q9R0U5;A0A494BAZ2;Q3TZN1;Q3UFN8;A0A494BAZ7;A0A494BAD4;A0A494B9B1;A0A494B9X1;A0A494BAC5	Matrin 3	Matr3	tr|Q5BL18|Q5BL18_MOUSE Matrin 3 OS=Mus musculus OX=10090 GN=Matr3 PE=1 SV=1;tr|Q4FJT0|Q4FJT0_MOUSE Matr3 protein OS=Mus musculus OX=10090 GN=Matr3 PE=2 SV=1;tr|Q3TTX0|Q3TTX0_MOUSE Uncharacterized protein OS=Mus musculus OX=10090 GN=Matr3 PE=2 SV=1;tr|Q6ZQ6	14	9	9	14.8	94.629	846	82.043	6.4	14.8	54297000	734280000	13.5234
Q8R3R1;Q8JZN2;Q3TXH7;Q3U1S6;Q80TP8;Q91W50;Q3U672;A0A0G2JF72;Q3U4S7;Q05C63;A0A0G2JDJ7;A0A0G2JE62;Q3UJ74	Csde1 protein (Fragment)	Csde1 D3Jfr1	tr|Q8R3R1|Q8R3R1_MOUSE Csde1 protein (Fragment) OS=Mus musculus OX=10090 GN=Csde1 PE=2 SV=1;tr|Q8JZN2|Q8JZN2_MOUSE Cold shock domain-containing protein E1 OS=Mus musculus OX=10090 GN=Csde1 PE=1 SV=1;tr|Q3TXH7|Q3TXH7_MOUSE Uncharacterized protein OS=Mus mus	13	9	9	14.7	76.86	689	64.939	4.5	13.2	47571000	235900000	4.9589
Q91VZ1;Q3U5L3;Q9CWK8	Sorting nexin-2	Snx2	tr|Q91VZ1|Q91VZ1_MOUSE Sorting nexin-2 OS=Mus musculus OX=10090 GN=Snx2 PE=2 SV=1;tr|Q3U5L3|Q3U5L3_MOUSE Sorting nexin-2 OS=Mus musculus OX=10090 GN=Snx2 PE=2 SV=1;sp|Q9CWK8|SNX2_MOUSE Sorting nexin-2 OS=Mus musculus OX=10090 GN=Snx2 PE=1 SV=2	3	11	9	26.8	58.452	519	91.631	24.7	19.8	370640000	291440000	0.786316
Q3U630;Q9D0R2;Q99KJ4	Threonyl-tRNA synthetase (EC 6.1.1.3)	Tars	tr|Q3U630|Q3U630_MOUSE Threonyl-tRNA synthetase OS=Mus musculus OX=10090 GN=Tars PE=2 SV=1;sp|Q9D0R2|SYTC_MOUSE Threonine--tRNA ligase 1, cytoplasmic OS=Mus musculus OX=10090 GN=Tars1 PE=1 SV=2;tr|Q99KJ4|Q99KJ4_MOUSE Threonyl-tRNA synthetase (Fragment) OS=	3	9	9	14.8	83.396	722	76.275	14.8	9.7	361240000	188510000	0.521841
Q3U6P5;Q9Z204;A0A2I3BRM6;A0A2I3BQH3	RRM domain-containing protein	Hnrnpc Hnrpc	tr|Q3U6P5|Q3U6P5_MOUSE RRM domain-containing protein OS=Mus musculus OX=10090 GN=Hnrnpc PE=2 SV=1;sp|Q9Z204|HNRPC_MOUSE Heterogeneous nuclear ribonucleoproteins C1/C2 OS=Mus musculus OX=10090 GN=Hnrnpc PE=1 SV=1	4	9	9	27.5	36.905	334	58.368	25.4	27.5	102860000	1175500000	11.4282
Q6IRT4;Q8BTW2;Q3U8X1;Q9DCH4;Q3UVY8;Q8VH52;B0LAD0	Eukaryotic translation initiation factor 3 subunit F (eIF3f) (Eukaryotic translation initiation factor 3 subunit 5) (eIF-3-epsilon) (eIF3 p47)	Eif3f EIF3F EIF3S5	tr|Q6IRT4|Q6IRT4_MOUSE Eukaryotic translation initiation factor 3 subunit F OS=Mus musculus OX=10090 GN=Eif3f PE=2 SV=1;tr|Q8BTW2|Q8BTW2_MOUSE Eukaryotic translation initiation factor 3 subunit F OS=Mus musculus OX=10090 GN=Eif3f PE=2 SV=1;tr|Q3U8X1|Q3U8X1	7	9	9	30	37.881	360	97.48	30	20	1071600000	314440000	0.29343
Q3UH60;B2RQC7	Disco-interacting protein 2 homolog B (DIP2 homolog B)	Dip2b Kiaa1463	sp|Q3UH60|DIP2B_MOUSE Disco-interacting protein 2 homolog B OS=Mus musculus OX=10090 GN=Dip2b PE=1 SV=1;tr|B2RQC7|B2RQC7_MOUSE DIP2 disco-interacting protein 2 homolog B (Drosophila) OS=Mus musculus OX=10090 GN=Dip2b PE=1 SV=1	2	10	9	8.2	171.12	1574	78.868	8.2	2.8	319250000	43646000	0.136714
Q3UVI9;Q99LE6	Uncharacterized protein	Abcf2	tr|Q3UVI9|Q3UVI9_MOUSE Uncharacterized protein OS=Mus musculus OX=10090 GN=Abcf2 PE=2 SV=1;sp|Q99LE6|ABCF2_MOUSE ATP-binding cassette sub-family F member 2 OS=Mus musculus OX=10090 GN=Abcf2 PE=1 SV=1	2	9	9	17.2	71.813	628	62.114	10	17.2	76174000	233430000	3.06443
Q5U438;Q5SQB7;Q61937;Q9DAY9;Q5SQB0;Q5SQB5;Q3U536;Q8BSZ3;Q5BL09;Q3UDA7	Nucleophosmin	Npm1	tr|Q5U438|Q5U438_MOUSE Nucleophosmin OS=Mus musculus OX=10090 GN=Npm1 PE=2 SV=1;tr|Q5SQB7|Q5SQB7_MOUSE Nucleophosmin OS=Mus musculus OX=10090 GN=Npm1 PE=1 SV=1;sp|Q61937|NPM_MOUSE Nucleophosmin OS=Mus musculus OX=10090 GN=Npm1 PE=1 SV=1;tr|Q9DAY9|Q9DAY9_MO	10	9	9	40.1	32.588	292	71.849	40.1	31.8	961050000	2318300000	2.41226
Q5SWR1;Q9DBG3;H3BIY9;H3BKM0;H3BJ06	AP complex subunit beta	Ap2b1	tr|Q5SWR1|Q5SWR1_MOUSE AP complex subunit beta OS=Mus musculus OX=10090 GN=Ap2b1 PE=2 SV=1;sp|Q9DBG3|AP2B1_MOUSE AP-2 complex subunit beta OS=Mus musculus OX=10090 GN=Ap2b1 PE=1 SV=1;tr|H3BIY9|H3BIY9_MOUSE AP complex subunit beta OS=Mus musculus OX=10090 G	5	22	9	27.5	105.72	951	163.55	27.5	21.3	1506400000	934960000	0.620659
Q5SYD0;B2RWZ2;Q8K063;Q3UG58;Q91ZI5	Unconventional myosin-Id	Myo1d	sp|Q5SYD0|MYO1D_MOUSE Unconventional myosin-Id OS=Mus musculus OX=10090 GN=Myo1d PE=1 SV=1;tr|B2RWZ2|B2RWZ2_MOUSE Myo1d protein OS=Mus musculus OX=10090 GN=Myo1d PE=2 SV=1	5	10	9	10.4	116.08	1006	63.729	9.7	7.8	119990000	222570000	1.8549
Q61699;E9Q0U7;D3Z3I9;A0A0J9YTZ7;D3Z027;Q8C6H1	Heat shock protein 105 kDa (42 degrees C-HSP) (Heat shock 110 kDa protein) (Heat shock-related 100 kDa protein E7I) (HSP-E7I)	Hsph1 Hsp105 Hsp110 Kiaa0201	sp|Q61699|HS105_MOUSE Heat shock protein 105 kDa OS=Mus musculus OX=10090 GN=Hsph1 PE=1 SV=2;tr|E9Q0U7|E9Q0U7_MOUSE Heat shock protein 105 kDa OS=Mus musculus OX=10090 GN=Hsph1 PE=1 SV=1	6	10	9	15.4	96.406	858	64.931	11.4	12.2	168810000	236910000	1.40341
Q6P5D8;A0A3B2W494	Structural maintenance of chromosomes flexible hinge domain-containing protein 1 (SMC hinge domain-containing protein 1) (EC 3.6.1.-)	Smchd1 Kiaa0650	sp|Q6P5D8|SMHD1_MOUSE Structural maintenance of chromosomes flexible hinge domain-containing protein 1 OS=Mus musculus OX=10090 GN=Smchd1 PE=1 SV=2	2	9	9	5.6	225.65	2007	59.582	1.4	5.6	13769000	226790000	16.4711
Q80ZX0;Q3UDH4;Q3U882;F6VJC5;Q6PFZ1	Sec24-related gene family, member B (S. cerevisiae)	Sec24b	tr|Q80ZX0|Q80ZX0_MOUSE Sec24-related gene family, member B (S. cerevisiae) OS=Mus musculus OX=10090 GN=Sec24b PE=1 SV=1;tr|Q3UDH4|Q3UDH4_MOUSE Uncharacterized protein (Fragment) OS=Mus musculus OX=10090 GN=Sec24b PE=2 SV=1;tr|Q3U882|Q3U882_MOUSE Uncharacte	5	9	9	11.2	135.55	1251	88.087	11.2	8.9	253710000	149790000	0.590398
Q8R5K4;Q3TBM4;Q3U5C6;Q3TB71	Nucleolar protein 6 (Nucleolar RNA-associated protein) (Nrap)	Nol6	sp|Q8R5K4|NOL6_MOUSE Nucleolar protein 6 OS=Mus musculus OX=10090 GN=Nol6 PE=2 SV=2;tr|Q3TBM4|Q3TBM4_MOUSE Nucleolar protein 6 (Fragment) OS=Mus musculus OX=10090 GN=Nol6 PE=2 SV=1;tr|Q3U5C6|Q3U5C6_MOUSE Nucleolar protein 6 (Fragment) OS=Mus musculus OX=10	4	9	9	9.8	129.23	1152	65.465	6.9	9.8	104070000	344080000	3.30624
Q9JL12;Q9JHF5;Q91W06;F6XRE6;Q9JL11;Q9CTA9;A0A494B9E3;F6ZFB8	V-type proton ATPase subunit a	Tcirg1	tr|Q9JL12|Q9JL12_MOUSE V-type proton ATPase subunit a OS=Mus musculus OX=10090 GN=Tcirg1 PE=2 SV=1;tr|Q9JHF5|Q9JHF5_MOUSE V-type proton ATPase subunit a OS=Mus musculus OX=10090 GN=Tcirg1 PE=1 SV=1;tr|Q91W06|Q91W06_MOUSE V-type proton ATPase subunit a OS=M	8	9	9	16.4	93.505	834	104.74	7.1	16.4	67829000	1769400000	26.0862
Q99KI0;A0A2R8VJW0	Aconitate hydratase, mitochondrial (Aconitase) (EC 4.2.1.3) (Citrate hydro-lyase)	Aco2	sp|Q99KI0|ACON_MOUSE Aconitate hydratase, mitochondrial OS=Mus musculus OX=10090 GN=Aco2 PE=1 SV=1	2	9	9	17.9	85.462	780	77.256	13.8	17.9	153700000	397730000	2.5877
Q99ME9;Q3TPJ4;Q3UR29;A0A217FL53;Q8CCQ5	Nucleolar GTP-binding protein 1 (Chronic renal failure gene protein) (GTP-binding protein NGB)	Gtpbp4 Crfg Nog1	sp|Q99ME9|NOG1_MOUSE Nucleolar GTP-binding protein 1 OS=Mus musculus OX=10090 GN=Gtpbp4 PE=1 SV=3;tr|Q3TPJ4|Q3TPJ4_MOUSE Nucleolar GTP-binding protein 1 (Fragment) OS=Mus musculus OX=10090 GN=Gtpbp4 PE=2 SV=1;tr|Q3UR29|Q3UR29_MOUSE Nucleolar GTP-binding pr	5	9	9	13.6	74.112	634	55.11	3.2	13.6	26968000	272180000	10.0927
Q9Z2X1;J3QMT0;J3QM80;Q8R582;J3QP45;J3QNH2;J3QMV8	Heterogeneous nuclear ribonucleoprotein F (hnRNP F) [Cleaved into: Heterogeneous nuclear ribonucleoprotein F, N-terminally processed]	Hnrnpf Hnrpf	sp|Q9Z2X1|HNRPF_MOUSE Heterogeneous nuclear ribonucleoprotein F OS=Mus musculus OX=10090 GN=Hnrnpf PE=1 SV=3;tr|J3QMT0|J3QMT0_MOUSE Heterogeneous nuclear ribonucleoprotein F (Fragment) OS=Mus musculus OX=10090 GN=Hnrnpf PE=1 SV=8;tr|J3QM80|J3QM80_MOUSE Het	7	11	9	39.3	45.729	415	93.597	28	39.3	350890000	1791100000	5.10445
A0A571BGC6;A0A571BF93;A0A0A0MQA6;F7ACR9;E9QNP1;E9QA63;B1ARU4;E9PVY8;Q9QXZ0;F6Q750;F6XCT0;F6SHS0;Q3UPG9;Q80TZ5;A0A5F8MP99;Q5DTZ2;A0A0A0MQH5;Q8C8N4	Microtubule-actin cross-linking factor 1	Macf1	tr|A0A571BGC6|A0A571BGC6_MOUSE Microtubule-actin cross-linking factor 1 OS=Mus musculus OX=10090 GN=Macf1 PE=1 SV=1;tr|A0A571BF93|A0A571BF93_MOUSE Microtubule-actin cross-linking factor 1 OS=Mus musculus OX=10090 GN=Macf1 PE=1 SV=1;tr|A0A0A0MQA6|A0A0A0MQA6	18	8	8	2	606.02	5309	46.859	0.2	2	3389000	102700000	30.3039
A0A0R4J083;P51174	Long-chain specific acyl-CoA dehydrogenase, mitochondrial (EC 1.3.8.8)	Acadl	tr|A0A0R4J083|A0A0R4J083_MOUSE Long-chain specific acyl-CoA dehydrogenase, mitochondrial OS=Mus musculus OX=10090 GN=Acadl PE=1 SV=1;sp|P51174|ACADL_MOUSE Long-chain specific acyl-CoA dehydrogenase, mitochondrial OS=Mus musculus OX=10090 GN=Acadl PE=1 SV=2	2	8	8	21.9	47.896	430	73.852	21.9	21.9	272080000	481350000	1.76915
A0A0R4J0V5;O08847;P08775;Q3TC95	DNA-directed RNA polymerase subunit (EC 2.7.7.6)	Polr2a	tr|A0A0R4J0V5|A0A0R4J0V5_MOUSE DNA-directed RNA polymerase subunit OS=Mus musculus OX=10090 GN=Polr2a PE=1 SV=1;tr|O08847|O08847_MOUSE DNA-directed RNA polymerase subunit OS=Mus musculus OX=10090 GN=Polr2a PE=2 SV=1;sp|P08775|RPB1_MOUSE DNA-directed RNA po	4	8	8	6.2	213.48	1932	69.845	4.8	5.7	212200000	138820000	0.654194
A0A0R4J0W6;Q9CRC8;Q78KN5	Leucine-rich repeat-containing protein 40	Lrrc40	tr|A0A0R4J0W6|A0A0R4J0W6_MOUSE Leucine-rich repeat-containing protein 40 OS=Mus musculus OX=10090 GN=Lrrc40 PE=1 SV=1;sp|Q9CRC8|LRC40_MOUSE Leucine-rich repeat-containing protein 40 OS=Mus musculus OX=10090 GN=Lrrc40 PE=1 SV=2;tr|Q78KN5|Q78KN5_MOUSE Lrrc40	3	8	8	14.1	68.048	602	55.437	14.1	8.5	113660000	83878000	0.737973
A1L3B8;P26516	Proteasome (Prosome, macropain) 26S subunit, non-ATPase, 7	Psmd7	tr|A1L3B8|A1L3B8_MOUSE Proteasome (Prosome, macropain) 26S subunit, non-ATPase, 7 OS=Mus musculus OX=10090 GN=Psmd7 PE=1 SV=1;sp|P26516|PSMD7_MOUSE 26S proteasome non-ATPase regulatory subunit 7 OS=Mus musculus OX=10090 GN=Psmd7 PE=1 SV=2	2	8	8	30.8	36.539	321	56.297	30.8	30.8	576680000	365130000	0.633159
C8YIX4;Q8CHP4;Q8CHP3;Q3UM93;Q3ULZ7;A2VCP3;Q9Z1M0;Q3UN00;Q3TBP1;F8WI93;Q6P5P0	P2X purinoceptor	P2rx7	tr|C8YIX4|C8YIX4_MOUSE P2X purinoceptor OS=Mus musculus OX=10090 GN=P2rx7 PE=1 SV=1;tr|Q8CHP4|Q8CHP4_MOUSE P2X purinoceptor OS=Mus musculus OX=10090 GN=P2rx7 PE=1 SV=1;tr|Q8CHP3|Q8CHP3_MOUSE P2X purinoceptor OS=Mus musculus OX=10090 GN=P2rx7 PE=2 SV=1;tr|Q	11	8	8	14.7	67.773	592	67.447	14.7	11.5	374980000	66824000	0.178207
Q3UWP8;B2MWM9;P14211	Uncharacterized protein (Fragment)	Calr	tr|Q3UWP8|Q3UWP8_MOUSE Uncharacterized protein (Fragment) OS=Mus musculus OX=10090 GN=Calr PE=2 SV=1;tr|B2MWM9|B2MWM9_MOUSE Calreticulin OS=Mus musculus OX=10090 GN=Calr PE=1 SV=1;sp|P14211|CALR_MOUSE Calreticulin OS=Mus musculus OX=10090 GN=Calr PE=1 SV=1	3	8	8	38.3	42.195	368	66.415	3.5	38.3	26321000	895650000	34.028
B7ZMR0;Q76LS9	Ubiquitin carboxyl-terminal hydrolase (EC 3.4.19.12)	Mindy1 Fam63a	tr|B7ZMR0|B7ZMR0_MOUSE Ubiquitin carboxyl-terminal hydrolase OS=Mus musculus OX=10090 GN=Mindy1 PE=2 SV=1;sp|Q76LS9|MINY1_MOUSE Ubiquitin carboxyl-terminal hydrolase MINDY-1 OS=Mus musculus OX=10090 GN=Mindy1 PE=1 SV=1	2	8	8	24.4	51.225	468	79.756	24.4	19.9	450310000	357240000	0.79332
Q6P7V9;E9Q2X6;Q8CG47;Q3UR81;Q3UZJ7	Structural maintenance of chromosomes protein	Smc4 Smc4l1	tr|Q6P7V9|Q6P7V9_MOUSE Structural maintenance of chromosomes protein OS=Mus musculus OX=10090 GN=Smc4 PE=2 SV=1;tr|E9Q2X6|E9Q2X6_MOUSE Structural maintenance of chromosomes protein OS=Mus musculus OX=10090 GN=Smc4 PE=1 SV=1;sp|Q8CG47|SMC4_MOUSE Structural	5	8	8	6.7	139.52	1216	49.401	3.9	6.7	186770000	265920000	1.42378
E9Q852;E9PYX7;E9Q9C3;Q9QZQ1;A0A668KLE6;Q3TLN8;D3Z7L2;D3YUD2	Afadin	Afdn	tr|E9Q852|E9Q852_MOUSE Afadin OS=Mus musculus OX=10090 GN=Afdn PE=1 SV=2;tr|E9PYX7|E9PYX7_MOUSE Afadin OS=Mus musculus OX=10090 GN=Afdn PE=1 SV=1;tr|E9Q9C3|E9Q9C3_MOUSE Afadin OS=Mus musculus OX=10090 GN=Afdn PE=1 SV=1;sp|Q9QZQ1|AFAD_MOUSE Afadin OS=Mus mu	8	8	8	7.5	204.52	1805	64.956	7.5	7.5	102690000	193360000	1.88295
Q3TDM8;E9Q855;Q3UK26;Q3UXS0;O35609;B2M0S2;B2M0S3	Secretory carrier-associated membrane protein (Secretory carrier membrane protein)	Scamp3	tr|Q3TDM8|Q3TDM8_MOUSE Secretory carrier-associated membrane protein OS=Mus musculus OX=10090 GN=Scamp3 PE=2 SV=1;tr|E9Q855|E9Q855_MOUSE Secretory carrier-associated membrane protein OS=Mus musculus OX=10090 GN=Scamp3 PE=1 SV=1;tr|Q3UK26|Q3UK26_MOUSE Secre	7	8	8	37.1	34.576	315	114.33	37.1	37.1	1271200000	1745700000	1.37327
Q9DAB4;F7DBQ0;Q3TML0;Q3TJL8;Q3THH1;Q922R8	Protein disulfide-isomerase A6 (EC 5.3.4.1)	Pdia6 Txndc7	tr|Q9DAB4|Q9DAB4_MOUSE Protein disulfide-isomerase A6 OS=Mus musculus OX=10090 GN=Pdia6 PE=2 SV=1;tr|F7DBQ0|F7DBQ0_MOUSE Protein disulfide-isomerase A6 OS=Mus musculus OX=10090 GN=Pdia6 PE=1 SV=1;tr|Q3TML0|Q3TML0_MOUSE Protein disulfide-isomerase A6 OS=Mus	6	8	8	25.1	42.889	391	70.588	19.4	25.1	109660000	706060000	6.43863
H7BX95;Q6PDM2;F7AI47;F6QXN3	Serine/arginine-rich splicing factor 1 (Splicing factor, arginine/serine-rich 1)	Srsf1	tr|H7BX95|H7BX95_MOUSE Serine/arginine-rich splicing factor 1 OS=Mus musculus OX=10090 GN=Srsf1 PE=1 SV=1;sp|Q6PDM2|SRSF1_MOUSE Serine/arginine-rich splicing factor 1 OS=Mus musculus OX=10090 GN=Srsf1 PE=1 SV=3	4	8	8	32.4	28.329	253	56.366	28.1	28.5	237170000	606730000	2.55821
Q3UC68;Q3TWV1;Q3TMX0;O88601;Q3UBE4;Q3UB97;O08992;Q3TXC7;Q3U724;Q3U6J5;Q3U902;Q3TET7;A2AKJ9;A2AKJ6;H3BLG5;Q3U6Q3;A2AKJ5	Uncharacterized protein	Sdcbp	tr|Q3UC68|Q3UC68_MOUSE Uncharacterized protein OS=Mus musculus OX=10090 GN=Sdcbp PE=2 SV=1;tr|Q3TWV1|Q3TWV1_MOUSE Uncharacterized protein OS=Mus musculus OX=10090 GN=Sdcbp PE=2 SV=1;tr|Q3TMX0|Q3TMX0_MOUSE Syntenin-1 OS=Mus musculus OX=10090 GN=Sdcbp PE=1 S	17	8	8	39.3	32.255	298	98.053	39.3	35.6	2346300000	448500000	0.191152
Q3V235;O35129;F6QPR1;Q3V2V2;F6Q8V7	Prohibitin	Phb2	tr|Q3V235|Q3V235_MOUSE Prohibitin OS=Mus musculus OX=10090 GN=Phb2 PE=1 SV=1;sp|O35129|PHB2_MOUSE Prohibitin-2 OS=Mus musculus OX=10090 GN=Phb2 PE=1 SV=1;tr|F6QPR1|F6QPR1_MOUSE Prohibitin (Fragment) OS=Mus musculus OX=10090 GN=Phb2 PE=1 SV=1;tr|Q3V2V2|Q3V2	5	8	8	32.8	33.296	299	79.419	5.7	32.8	5440500	1838000000	337.837
Q3UG68;Q3UC51;O54734	Dolichyl-diphosphooligosaccharide--protein glycosyltransferase 48 kDa subunit (Oligosaccharyl transferase 48 kDa subunit)	Ddost	tr|Q3UG68|Q3UG68_MOUSE Dolichyl-diphosphooligosaccharide--protein glycosyltransferase 48 kDa subunit OS=Mus musculus OX=10090 GN=Ddost PE=2 SV=1;tr|Q3UC51|Q3UC51_MOUSE Dolichyl-diphosphooligosaccharide--protein glycosyltransferase 48 kDa subunit OS=Mus mus	3	8	8	24	48.985	441	58.989	0	24	0	759770000	#DIV/0!
Q6PAC1;Q3TGJ9;P13020;A0A0J9YUQ8;Q3UCW8;Q3U9Q8;A6PWS5;A0A0J9YUJ8	Actin-depolymerizing factor (Brevin) (Gelsolin)	Gsn	tr|Q6PAC1|Q6PAC1_MOUSE Actin-depolymerizing factor OS=Mus musculus OX=10090 GN=Gsn PE=2 SV=1;tr|Q3TGJ9|Q3TGJ9_MOUSE Actin-depolymerizing factor OS=Mus musculus OX=10090 GN=Gsn PE=2 SV=1;sp|P13020|GELS_MOUSE Gelsolin OS=Mus musculus OX=10090 GN=Gsn PE=1 SV=	8	8	8	13.4	80.762	731	67.545	13.4	11.9	317560000	396580000	1.24883
Q5M9N8;Q3UBI6;Q3TK73;P14148;F6XI62	Ribosomal protein L7	Rpl7	tr|Q5M9N8|Q5M9N8_MOUSE Ribosomal protein L7 OS=Mus musculus OX=10090 GN=Rpl7 PE=1 SV=1;tr|Q3UBI6|Q3UBI6_MOUSE Uncharacterized protein OS=Mus musculus OX=10090 GN=Rpl7 PE=2 SV=1;tr|Q3TK73|Q3TK73_MOUSE Uncharacterized protein OS=Mus musculus OX=10090 GN=Rpl7	5	8	8	24.1	31.419	270	54.91	17.8	24.1	154080000	1992100000	12.929
Q5SVY2;Q3UAJ1;Q3TE63;P17742;Q9CZK9;A0A1L1SST0;A0A1L1SRX5;V9GXC1;V9GX31	Peptidyl-prolyl cis-trans isomerase (PPIase) (EC 5.2.1.8)	Ppia	tr|Q5SVY2|Q5SVY2_MOUSE Peptidyl-prolyl cis-trans isomerase OS=Mus musculus OX=10090 GN=Ppia PE=1 SV=1;tr|Q3UAJ1|Q3UAJ1_MOUSE Peptidyl-prolyl cis-trans isomerase OS=Mus musculus OX=10090 GN=Ppia PE=2 SV=1;tr|Q3TE63|Q3TE63_MOUSE Peptidyl-prolyl cis-trans iso	9	8	8	38.4	17.971	164	75.656	34.8	33.5	1503200000	698300000	0.464542
P17751;H7BXC3	Triosephosphate isomerase (TIM) (EC 5.3.1.1) (Methylglyoxal synthase) (EC 4.2.3.3) (Triose-phosphate isomerase)	Tpi1 Tpi	sp|P17751|TPIS_MOUSE Triosephosphate isomerase OS=Mus musculus OX=10090 GN=Tpi1 PE=1 SV=5;tr|H7BXC3|H7BXC3_MOUSE Triosephosphate isomerase OS=Mus musculus OX=10090 GN=Tpi1 PE=1 SV=1	2	8	8	49.4	26.712	249	86.947	49.4	49.4	2220500000	1061600000	0.478091
Q3TJN9;Q543T1;Q3UZ23;P22437	Prostaglandin-endoperoxide synthase (EC 1.14.99.1)	Ptgs1	tr|Q3TJN9|Q3TJN9_MOUSE Prostaglandin-endoperoxide synthase OS=Mus musculus OX=10090 GN=Ptgs1 PE=2 SV=1;tr|Q543T1|Q543T1_MOUSE Cyclooxygenase-1 OS=Mus musculus OX=10090 GN=Ptgs1 PE=1 SV=1;tr|Q3UZ23|Q3UZ23_MOUSE Cyclooxygenase-1 OS=Mus musculus OX=10090 GN=P	4	8	8	20.3	55.98	488	57.325	0	20.3	0	343240000	#DIV/0!
Q8C2U7;Q3UZG4;P31230;A0A0G2JDH0;Q3TUZ1;A0A0G2JEU9;A0A0G2JDW6	tRNA-binding domain-containing protein	Aimp1 Scye1	tr|Q8C2U7|Q8C2U7_MOUSE tRNA-binding domain-containing protein OS=Mus musculus OX=10090 GN=Aimp1 PE=2 SV=1;tr|Q3UZG4|Q3UZG4_MOUSE Aminoacyl tRNA synthase complex-interacting multifunctional protein 1 OS=Mus musculus OX=10090 GN=Aimp1 PE=1 SV=1;sp|P31230|AIM	7	8	8	37.6	35.196	319	67.306	36.1	37.6	438140000	827160000	1.88789
P37040;Q05DV1;E9PVT9;E9Q997	NADPH--cytochrome P450 reductase (CPR) (P450R) (EC 1.6.2.4)	Por	sp|P37040|NCPR_MOUSE NADPH--cytochrome P450 reductase OS=Mus musculus OX=10090 GN=Por PE=1 SV=2;tr|Q05DV1|Q05DV1_MOUSE NADPH--hemoprotein reductase OS=Mus musculus OX=10090 GN=Por PE=1 SV=1	4	8	8	20.1	77.043	678	65.244	5	20.1	10826000	484100000	44.7164
P46460;G3UX86;G3UX98	Vesicle-fusing ATPase (EC 3.6.4.6) (N-ethylmaleimide-sensitive fusion protein) (NEM-sensitive fusion protein) (Suppressor of K(+) transport growth defect 2) (Protein SKD2) (Vesicular-fusion protein NSF)	Nsf Skd2	sp|P46460|NSF_MOUSE Vesicle-fusing ATPase OS=Mus musculus OX=10090 GN=Nsf PE=1 SV=2	3	8	8	14	82.613	744	62.71	7.1	14	161740000	346230000	2.14066
P47758;Q542X6;A0A1W2P830	Signal recognition particle receptor subunit beta (SR-beta)	Srprb	sp|P47758|SRPRB_MOUSE Signal recognition particle receptor subunit beta OS=Mus musculus OX=10090 GN=Srprb PE=1 SV=1;tr|Q542X6|Q542X6_MOUSE Signal recognition particle receptor subunit beta OS=Mus musculus OX=10090 GN=Srprb PE=2 SV=1	3	8	8	39.8	29.579	269	57.659	3.7	39.8	90154000	605340000	6.71451
Q3U5U5;Q3U4D1;Q3TF14;P50247;Q8BPI7;Q5M9P0;A2ALT5	Adenosylhomocysteinase (EC 3.3.1.1)		tr|Q3U5U5|Q3U5U5_MOUSE Adenosylhomocysteinase OS=Mus musculus OX=10090 PE=2 SV=1;tr|Q3U4D1|Q3U4D1_MOUSE Adenosylhomocysteinase OS=Mus musculus OX=10090 PE=2 SV=1;tr|Q3TF14|Q3TF14_MOUSE Adenosylhomocysteinase OS=Mus musculus OX=10090 GN=Ahcy PE=1 SV=1;sp|P5	7	8	8	20.1	47.786	432	60.324	18.3	20.1	619130000	236400000	0.381826
Q3UDP9;Q3TMA0;P57787;B1ATM2;B1ATM1	MFS domain-containing protein	Slc16a3	tr|Q3UDP9|Q3UDP9_MOUSE MFS domain-containing protein OS=Mus musculus OX=10090 GN=Slc16a3 PE=1 SV=1;tr|Q3TMA0|Q3TMA0_MOUSE MFS domain-containing protein OS=Mus musculus OX=10090 GN=Slc16a3 PE=2 SV=1;sp|P57787|MOT4_MOUSE Monocarboxylate transporter 4 OS=Mus	5	8	8	17.9	50.373	470	77.973	17.9	16.2	2709400000	1885600000	0.695947
Q3UC02;Q9DB79;P62281;A0A1B0GRR3;Q9D0P6;A0A1B0GSE8;Q9CW75	40S ribosomal protein S11	Rps11	tr|Q3UC02|Q3UC02_MOUSE 40S ribosomal protein S11 OS=Mus musculus OX=10090 GN=Rps11 PE=1 SV=1;tr|Q9DB79|Q9DB79_MOUSE 40S ribosomal protein S11 OS=Mus musculus OX=10090 GN=Rps11 PE=2 SV=1;sp|P62281|RS11_MOUSE 40S ribosomal protein S11 OS=Mus musculus OX=1009	7	8	8	50.6	18.431	158	54.537	45.6	39.9	1405000000	2181200000	1.55246
P62715;Q8VED4;Q8BN07;P63330	Serine/threonine-protein phosphatase 2A catalytic subunit beta isoform (PP2A-beta) (EC 3.1.3.16)	Ppp2cb	sp|P62715|PP2AB_MOUSE Serine/threonine-protein phosphatase 2A catalytic subunit beta isoform OS=Mus musculus OX=10090 GN=Ppp2cb PE=1 SV=1;tr|Q8VED4|Q8VED4_MOUSE Serine/threonine-protein phosphatase OS=Mus musculus OX=10090 GN=Ppp2cb PE=2 SV=1;tr|Q8BN07|Q8B	4	9	8	38.5	35.575	309	135.92	38.5	24.6	570320000	142020000	0.249018
Q91YK6;Q4V9X9;Q5M9M5;P62751	Rpl23a protein (Fragment)	Rpl23a	tr|Q91YK6|Q91YK6_MOUSE Rpl23a protein (Fragment) OS=Mus musculus OX=10090 GN=Rpl23a PE=2 SV=1;tr|Q4V9X9|Q4V9X9_MOUSE Rpl23a protein (Fragment) OS=Mus musculus OX=10090 GN=Rpl23a PE=2 SV=1;tr|Q5M9M5|Q5M9M5_MOUSE Ribosomal protein L23a OS=Mus musculus OX=100	4	8	8	45	16.94	149	50.893	21.5	45	73353000	2571700000	35.0592
Q3ULW0;P62827;Q14AA6;A6H622;Q61820	GTP-binding nuclear protein Ran	Ran	tr|Q3ULW0|Q3ULW0_MOUSE GTP-binding nuclear protein Ran OS=Mus musculus OX=10090 GN=Ran PE=2 SV=1;sp|P62827|RAN_MOUSE GTP-binding nuclear protein Ran OS=Mus musculus OX=10090 GN=Ran PE=1 SV=3;tr|Q14AA6|Q14AA6_MOUSE GTP-binding nuclear protein Ran OS=Mus mus	5	8	8	32.4	24.351	216	61.914	32.4	30.1	7668900000	1901100000	0.247897
Q3TQ70;P62874;Q3U1B1;H3BKR2;H3BLF7;Q61621	Beta1 subnuit of GTP-binding protein (Beta1 subunit of GTP-binding protein)	Gnb1	tr|Q3TQ70|Q3TQ70_MOUSE Beta1 subnuit of GTP-binding protein OS=Mus musculus OX=10090 GN=Gnb1 PE=1 SV=1;sp|P62874|GBB1_MOUSE Guanine nucleotide-binding protein G(I)/G(S)/G(T) subunit beta-1 OS=Mus musculus OX=10090 GN=Gnb1 PE=1 SV=3;tr|Q3U1B1|Q3U1B1_MOUSE W	6	14	8	53.2	37.377	340	67.327	49.7	44.7	758430000	686070000	0.904592
Q5SX50;P62962;Q8CEH8;Q3U7V7;Q5SX49;J3QMC2	Profilin	Pfn1	tr|Q5SX50|Q5SX50_MOUSE Profilin OS=Mus musculus OX=10090 GN=Pfn1 PE=1 SV=1;sp|P62962|PROF1_MOUSE Profilin-1 OS=Mus musculus OX=10090 GN=Pfn1 PE=1 SV=2;tr|Q8CEH8|Q8CEH8_MOUSE Profilin OS=Mus musculus OX=10090 GN=Pfn1 PE=2 SV=1;tr|Q3U7V7|Q3U7V7_MOUSE Profili	6	8	8	69.3	14.957	140	69.24	59.3	69.3	939910000	578660000	0.615655
P97384;D3Z7U0	Annexin A11 (Annexin XI) (Annexin-11) (Calcyclin-associated annexin 50) (CAP-50)	Anxa11 Anx11	sp|P97384|ANX11_MOUSE Annexin A11 OS=Mus musculus OX=10090 GN=Anxa11 PE=1 SV=2;tr|D3Z7U0|D3Z7U0_MOUSE Annexin OS=Mus musculus OX=10090 GN=Anxa11 PE=1 SV=1	2	8	8	17.1	54.079	503	74.507	14.3	17.1	289990000	541290000	1.86658
Q3TIJ5;Q3TJZ5;P97452;Q3THV0	Ribosome biogenesis protein BOP1 (Block of proliferation 1 protein)	Bop1 BOP1	tr|Q3TIJ5|Q3TIJ5_MOUSE Ribosome biogenesis protein BOP1 OS=Mus musculus OX=10090 GN=Bop1 PE=2 SV=1;tr|Q3TJZ5|Q3TJZ5_MOUSE Ribosome biogenesis protein BOP1 OS=Mus musculus OX=10090 GN=Bop1 PE=2 SV=1;sp|P97452|BOP1_MOUSE Ribosome biogenesis protein BOP1 OS=M	4	8	8	15.7	83.124	731	60.225	6.4	15.7	145400000	384070000	2.64147
Q01320;Q6PET9;Q8CCE5;Q3UUS6	DNA topoisomerase 2-alpha (EC 5.6.2.2) (DNA topoisomerase II, alpha isozyme)	Top2a Top-2 Top2	sp|Q01320|TOP2A_MOUSE DNA topoisomerase 2-alpha OS=Mus musculus OX=10090 GN=Top2a PE=1 SV=2;tr|Q6PET9|Q6PET9_MOUSE DNA topoisomerase 2 (Fragment) OS=Mus musculus OX=10090 GN=Top2a PE=2 SV=1	4	13	8	10.1	172.79	1528	93.811	8.4	10.1	260550000	496410000	1.90524
Q059T9;Q9DAW6;Q80WA7;Q8BTJ0	PRP4 pre-mRNA processing factor 4 homolog (Yeast)	Prpf4	tr|Q059T9|Q059T9_MOUSE PRP4 pre-mRNA processing factor 4 homolog (Yeast) OS=Mus musculus OX=10090 GN=Prpf4 PE=1 SV=1;sp|Q9DAW6|PRP4_MOUSE U4/U6 small nuclear ribonucleoprotein Prp4 OS=Mus musculus OX=10090 GN=Prpf4 PE=1 SV=1;tr|Q80WA7|Q80WA7_MOUSE Prpf4 pr	4	8	8	21.1	58.369	521	66.666	18.4	12.9	297420000	97632000	0.328263
Q3TF84;Q922Q8	Uncharacterized protein	Lrrc59 AA959742	tr|Q3TF84|Q3TF84_MOUSE Uncharacterized protein OS=Mus musculus OX=10090 GN=Lrrc59 PE=2 SV=1;sp|Q922Q8|LRC59_MOUSE Leucine-rich repeat-containing protein 59 OS=Mus musculus OX=10090 GN=Lrrc59 PE=1 SV=1	2	8	8	48.9	20.408	186	74.888	15.6	48.9	11370000	1640100000	144.248
Q8BTX5;Q5M9L0;Q3TII2;Q3THW7;Q91WK2;Q3TIK5;Q8BMZ8	Eukaryotic translation initiation factor 3 subunit H (eIF3h) (Eukaryotic translation initiation factor 3 subunit 3) (eIF-3 gamma) (eIF3 p40 subunit)	Eif3h EIF3H EIF3S3	tr|Q8BTX5|Q8BTX5_MOUSE Eukaryotic translation initiation factor 3 subunit H OS=Mus musculus OX=10090 GN=Eif3h PE=2 SV=1;tr|Q5M9L0|Q5M9L0_MOUSE Eukaryotic translation initiation factor 3 subunit H OS=Mus musculus OX=10090 GN=Eif3h PE=1 SV=1;tr|Q3TII2|Q3TII2	7	8	8	32.1	39.846	352	55.909	32.1	24.7	550570000	256780000	0.466389
Q3TIU7;Q3UIQ2;Q91VD9;A0A087WSU3;A0A087WQ77	NADH-ubiquinone oxidoreductase 75 kDa subunit, mitochondrial	Ndufs1	tr|Q3TIU7|Q3TIU7_MOUSE NADH-ubiquinone oxidoreductase 75 kDa subunit, mitochondrial OS=Mus musculus OX=10090 GN=Ndufs1 PE=2 SV=1;tr|Q3UIQ2|Q3UIQ2_MOUSE NADH-ubiquinone oxidoreductase 75 kDa subunit, mitochondrial OS=Mus musculus OX=10090 GN=Ndufs1 PE=2 SV=	5	8	8	15.4	79.662	726	67.248	10.5	15.4	60216000	225070000	3.73771
Q3TK27;Q8CI11;A0A2I3BPZ6;A0A2I3BRV9;A0A2I3BR82;A0A2I3BR32	Guanine nucleotide-binding protein-like 3	Gnl3	tr|Q3TK27|Q3TK27_MOUSE Guanine nucleotide-binding protein-like 3 OS=Mus musculus OX=10090 GN=Gnl3 PE=2 SV=1;sp|Q8CI11|GNL3_MOUSE Guanine nucleotide-binding protein-like 3 OS=Mus musculus OX=10090 GN=Gnl3 PE=1 SV=2;tr|A0A2I3BPZ6|A0A2I3BPZ6_MOUSE Guanine nuc	6	8	8	22.5	60.786	538	55.881	2.6	22.5	37956000	181390000	4.77895
Q3TL79;Q8BK64;A0A1Y7VM19	Aha1_N domain-containing protein	Ahsa1	tr|Q3TL79|Q3TL79_MOUSE Aha1_N domain-containing protein OS=Mus musculus OX=10090 GN=Ahsa1 PE=2 SV=1;sp|Q8BK64|AHSA1_MOUSE Activator of 90 kDa heat shock protein ATPase homolog 1 OS=Mus musculus OX=10090 GN=Ahsa1 PE=1 SV=2	3	8	8	37.9	38.145	338	81.631	37.9	32.2	279630000	136220000	0.487144
Q5RKP0;Q499X4;Q3TXD3;Q62465;Q3U331	Vat1 protein (Fragment)	Vat1	tr|Q5RKP0|Q5RKP0_MOUSE Vat1 protein (Fragment) OS=Mus musculus OX=10090 GN=Vat1 PE=2 SV=1;tr|Q499X4|Q499X4_MOUSE Vesicle amine transport protein 1 homolog (T californica) OS=Mus musculus OX=10090 GN=Vat1 PE=1 SV=1;tr|Q3TXD3|Q3TXD3_MOUSE PKS_ER domain-conta	5	8	8	30.7	42.521	401	81.614	26.7	30.7	307430000	959290000	3.12035
Q3U313;Q8VH51;Q0VGU9;E9Q8F0;Q3UXT6;F7AA45;B7ZD61;B7ZD63;Q3TJP1;B7ZD64;E9PZF9;D6RCZ8;E9Q999;D6RJ85;Q3UZ51	Uncharacterized protein	Rbm39 Rnpc2	tr|Q3U313|Q3U313_MOUSE Uncharacterized protein OS=Mus musculus OX=10090 GN=Rbm39 PE=2 SV=1;sp|Q8VH51|RBM39_MOUSE RNA-binding protein 39 OS=Mus musculus OX=10090 GN=Rbm39 PE=1 SV=2;tr|Q0VGU9|Q0VGU9_MOUSE Rbm39 protein OS=Mus musculus OX=10090 GN=Rbm39 PE=2	15	8	8	19.7	58.683	524	75.114	9.5	19.7	62293000	281860000	4.52475
Q5M8Q0;Q3U7D2;Q9CZM2;B8JKK2	Ribosomal protein L15	Rpl15	tr|Q5M8Q0|Q5M8Q0_MOUSE Ribosomal protein L15 OS=Mus musculus OX=10090 GN=Rpl15 PE=2 SV=1;tr|Q3U7D2|Q3U7D2_MOUSE Ribosomal protein L15 OS=Mus musculus OX=10090 GN=Rpl15 PE=2 SV=1;sp|Q9CZM2|RL15_MOUSE 60S ribosomal protein L15 OS=Mus musculus OX=10090 GN=Rpl	4	8	8	28.4	24.146	204	51.455	27.9	28.4	175220000	2094200000	11.9518
Q91V28;Q3UAG2;Q9DCD0;Q91YT9	6-phosphogluconate dehydrogenase, decarboxylating (EC 1.1.1.44)	Pgd	tr|Q91V28|Q91V28_MOUSE 6-phosphogluconate dehydrogenase, decarboxylating OS=Mus musculus OX=10090 GN=Pgd PE=2 SV=1;tr|Q3UAG2|Q3UAG2_MOUSE 6-phosphogluconate dehydrogenase, decarboxylating OS=Mus musculus OX=10090 GN=Pgd PE=2 SV=1;sp|Q9DCD0|6PGD_MOUSE 6-pho	4	8	8	24	53.261	483	66.031	24	19	700520000	211200000	0.30149
Q99LB4;Q3UJ44;Q3TNN6;P24452;D3YTL5;D3YZN3;D3YU77	Macrophage-capping protein (Actin regulatory protein CAP-G)	Capg	tr|Q99LB4|Q99LB4_MOUSE Macrophage-capping protein OS=Mus musculus OX=10090 GN=Capg PE=1 SV=1;tr|Q3UJ44|Q3UJ44_MOUSE Macrophage-capping protein OS=Mus musculus OX=10090 GN=Capg PE=2 SV=1;tr|Q3TNN6|Q3TNN6_MOUSE Macrophage-capping protein OS=Mus musculus OX=1	7	8	8	37.2	38.768	349	87.52	37.2	32.1	1263000000	281470000	0.222858
Q8BZN7;Q569Z6;Q8R353;Q91VL2;Q8BV76;F7AB07;F6YSQ2;Q3U503	Thyroid hormone receptor-associated protein 3	Thrap3	tr|Q8BZN7|Q8BZN7_MOUSE Thyroid hormone receptor-associated protein 3 OS=Mus musculus OX=10090 GN=Thrap3 PE=1 SV=1;sp|Q569Z6|TR150_MOUSE Thyroid hormone receptor-associated protein 3 OS=Mus musculus OX=10090 GN=Thrap3 PE=1 SV=1;tr|Q8R353|Q8R353_MOUSE Thrap3	8	8	8	12	80.11	709	51.372	0	12	0	265310000	#DIV/0!
Q5RL55;Q6P542;Q3U6P1;Q99K92;G3V012;Q9JL47;A1A4B8	ATP-binding cassette, sub-family F (GCN20), member 1	Abcf1	tr|Q5RL55|Q5RL55_MOUSE ATP-binding cassette, sub-family F (GCN20), member 1 OS=Mus musculus OX=10090 GN=Abcf1 PE=2 SV=1;sp|Q6P542|ABCF1_MOUSE ATP-binding cassette sub-family F member 1 OS=Mus musculus OX=10090 GN=Abcf1 PE=1 SV=1	7	8	8	13.3	94.815	836	57.608	7.8	13.3	67866000	331090000	4.87858
Q80UL3;Q9R0N0;Q9CXZ9;Q9CWW5	Galactokinase 1	Galk1	tr|Q80UL3|Q80UL3_MOUSE Galactokinase 1 OS=Mus musculus OX=10090 GN=Galk1 PE=2 SV=1;sp|Q9R0N0|GALK1_MOUSE Galactokinase OS=Mus musculus OX=10090 GN=Galk1 PE=1 SV=2;tr|Q9CXZ9|Q9CXZ9_MOUSE Uncharacterized protein OS=Mus musculus OX=10090 GN=Galk1 PE=2 SV=1;tr	4	8	8	22.4	42.309	392	57.918	22.4	15.6	455130000	376940000	0.828203
Q80YG4;Q8VHE0;Q8K2U5	SEC63	Sec63	tr|Q80YG4|Q80YG4_MOUSE SEC63 OS=Mus musculus OX=10090 GN=Sec63 PE=2 SV=1;sp|Q8VHE0|SEC63_MOUSE Translocation protein SEC63 homolog OS=Mus musculus OX=10090 GN=Sec63 PE=1 SV=4;tr|Q8K2U5|Q8K2U5_MOUSE Sec63 protein (Fragment) OS=Mus musculus OX=10090 GN=Sec63	3	8	8	12.5	87.814	760	71.7	0	12.5	0	257300000	#DIV/0!
Q8BWT1;Q3UKH3;A0A494B9J2	3-ketoacyl-CoA thiolase, mitochondrial (EC 2.3.1.16) (Acetyl-CoA acetyltransferase) (EC 2.3.1.9) (Acetyl-CoA acyltransferase) (Acyl-CoA hydrolase, mitochondrial) (EC 3.1.2.-) (EC 3.1.2.1) (EC 3.1.2.2) (Beta-ketothiolase) (Mitochondrial 3-oxoacyl-CoA thiolase)	Acaa2	sp|Q8BWT1|THIM_MOUSE 3-ketoacyl-CoA thiolase, mitochondrial OS=Mus musculus OX=10090 GN=Acaa2 PE=1 SV=3;tr|Q3UKH3|Q3UKH3_MOUSE Uncharacterized protein OS=Mus musculus OX=10090 GN=Acaa2 PE=2 SV=1	3	8	8	31.5	41.829	397	77.143	9.6	31.5	74610000	735390000	9.85645
Q8BYA0;Q8CHC0	Tubulin-specific chaperone D (Beta-tubulin cofactor D) (Tubulin-folding cofactor D)	Tbcd	sp|Q8BYA0|TBCD_MOUSE Tubulin-specific chaperone D OS=Mus musculus OX=10090 GN=Tbcd PE=1 SV=1	2	8	8	8.6	133.32	1196	59.315	8.6	5.4	220950000	52318000	0.236787
Q8R4Z6;Q9JJY4;Q8BQD9;Q8R4Z5;A0A0G2JE88	RNA helicase (EC 3.6.4.13)	Ddx20	tr|Q8R4Z6|Q8R4Z6_MOUSE RNA helicase OS=Mus musculus OX=10090 GN=Ddx20 PE=2 SV=1;sp|Q9JJY4|DDX20_MOUSE Probable ATP-dependent RNA helicase DDX20 OS=Mus musculus OX=10090 GN=Ddx20 PE=1 SV=2;tr|Q8BQD9|Q8BQD9_MOUSE RNA helicase OS=Mus musculus OX=10090 PE=2 SV	5	8	8	14.9	91.782	825	68.04	3.9	14.9	11851000	237340000	20.027
Q9CSH0;Q921F4;V9GXB6;Q3TBR4;Q3UXJ3	Uncharacterized protein (Fragment)	Hnrnpll Hnrpll	tr|Q9CSH0|Q9CSH0_MOUSE Uncharacterized protein (Fragment) OS=Mus musculus OX=10090 GN=Hnrnpll PE=2 SV=1;sp|Q921F4|HNRLL_MOUSE Heterogeneous nuclear ribonucleoprotein L-like OS=Mus musculus OX=10090 GN=Hnrnpll PE=1 SV=3;tr|V9GXB6|V9GXB6_MOUSE Heterogeneous	5	8	8	18.2	63.39	588	60.288	15.6	18.2	135960000	314210000	2.31105
Q9CU62;A0JLM6;Q6A0B0;Q7TNG4	Structural maintenance of chromosomes protein 1A (SMC protein 1A) (SMC-1-alpha) (SMC-1A) (Chromosome segregation protein SmcB) (Sb1.8)	Smc1a Sb1.8 Smc1 Smc1l1 Smcb	sp|Q9CU62|SMC1A_MOUSE Structural maintenance of chromosomes protein 1A OS=Mus musculus OX=10090 GN=Smc1a PE=1 SV=4;tr|A0JLM6|A0JLM6_MOUSE Structural maintenance of chromosomes protein 1A (Fragment) OS=Mus musculus OX=10090 GN=Smc1a PE=2 SV=1	4	8	8	7.1	143.23	1233	55.389	2.4	7.1	36980000	189140000	5.11466
Q9D1A2;Q6KAT3;A0A494B9S3;Q3TG71;A0A494B9U6	Cytosolic non-specific dipeptidase (EC 3.4.13.18) (CNDP dipeptidase 2) (Glutamate carboxypeptidase-like protein 1)	Cndp2 Cn2	sp|Q9D1A2|CNDP2_MOUSE Cytosolic non-specific dipeptidase OS=Mus musculus OX=10090 GN=Cndp2 PE=1 SV=1;tr|Q6KAT3|Q6KAT3_MOUSE MFLJ00064 protein (Fragment) OS=Mus musculus OX=10090 GN=Cndp2 PE=2 SV=1;tr|A0A494B9S3|A0A494B9S3_MOUSE Cytosolic non-specific dipep	5	8	8	20.4	52.767	475	60.045	17.9	11.6	296190000	141360000	0.477261
Q9DBY8;Q9CRW9	Nuclear valosin-containing protein-like (NVLp) (Nuclear VCP-like protein)	Nvl	sp|Q9DBY8|NVL_MOUSE Nuclear valosin-containing protein-like OS=Mus musculus OX=10090 GN=Nvl PE=1 SV=1	2	8	8	13.3	94.475	855	66.624	5.3	13.3	58870000	241170000	4.09665
Q9EPL8;A0A140LHD0	Importin-7 (Imp7) (Ran-binding protein 7) (RanBP7)	Ipo7 Ranbp7	sp|Q9EPL8|IPO7_MOUSE Importin-7 OS=Mus musculus OX=10090 GN=Ipo7 PE=1 SV=2	2	8	8	10	119.49	1038	56.69	10	7.5	279080000	148590000	0.532428
Q9QYI3;A0A6I8MWY7;A0A6I8MWZ1;A2A5E1;A0A6I8MX00;Q3UL32;A0A6I8MWX8;F7BTP8;A0A6I8MWZ9;A0A6I8MWW0;A0A6I8MWZ5;A0A6I8MWW2;A0A6I8MX31	DnaJ homolog subfamily C member 7 (Cytoplasmic CAR retention protein) (CCRP) (MDj11) (Tetratricopeptide repeat protein 2) (TPR repeat protein 2)	Dnajc7 Ttc2	sp|Q9QYI3|DNJC7_MOUSE DnaJ homolog subfamily C member 7 OS=Mus musculus OX=10090 GN=Dnajc7 PE=1 SV=2;tr|A0A6I8MWY7|A0A6I8MWY7_MOUSE DnaJ homolog subfamily C member 7 OS=Mus musculus OX=10090 GN=Dnajc7 PE=1 SV=1;tr|A0A6I8MWZ1|A0A6I8MWZ1_MOUSE DnaJ homolog s	13	8	8	23.1	56.475	494	58.4	17.4	23.1	139250000	234270000	1.68237
Q9QZQ8;Q8CA90;Q9CTR1;Q9D3U7;Q8BP16;Q9D3V6;Q8CCK0	Core histone macro-H2A.1 (Histone macroH2A1) (mH2A1) (H2A.y) (H2A/y)	Macroh2a1 H2afy	sp|Q9QZQ8|H2AY_MOUSE Core histone macro-H2A.1 OS=Mus musculus OX=10090 GN=Macroh2a1 PE=1 SV=3;tr|Q8CA90|Q8CA90_MOUSE Histone H2A OS=Mus musculus OX=10090 GN=Macroh2a1 PE=2 SV=1	7	8	8	30.4	39.735	372	55.578	13.2	30.4	187110000	502600000	2.68612
Q9WUP7;A0A087WP81;A0A087WRL3	Ubiquitin carboxyl-terminal hydrolase isozyme L5 (UCH-L5) (EC 3.4.19.12) (Ubiquitin C-terminal hydrolase UCH37) (Ubiquitin thioesterase L5)	Uchl5 Uch37	sp|Q9WUP7|UCHL5_MOUSE Ubiquitin carboxyl-terminal hydrolase isozyme L5 OS=Mus musculus OX=10090 GN=Uchl5 PE=1 SV=2;tr|A0A087WP81|A0A087WP81_MOUSE Ubiquitinyl hydrolase 1 (Fragment) OS=Mus musculus OX=10090 GN=Uchl5 PE=1 SV=1	3	8	8	35.6	37.616	329	71.669	35.6	35.6	297470000	420290000	1.41288
Q9WVA4;A0A0A6YXG6	Transgelin-2 (SM22-beta)	Tagln2 Kiaa0120	sp|Q9WVA4|TAGL2_MOUSE Transgelin-2 OS=Mus musculus OX=10090 GN=Tagln2 PE=1 SV=4	2	8	8	49.2	22.395	199	76.568	49.2	41.2	627310000	198340000	0.316175
A0A087WQF8;A0A087WP48;A0A087WS04;A0A087WS29;A0A087WQG4;A0A087WQD0;A0A087WNW3;A0A087WQI3;A0A087WPW5;A0A087WS23;A0A087WQ25;A0A087WRS1;A0A087WQQ5;A0A087WP85;A0A087WP14;A0A087WPX0;F8VQC7;Q61595;A0A087WR91;A0A087WPY8	Kinectin	Ktn1	tr|A0A087WQF8|A0A087WQF8_MOUSE Kinectin OS=Mus musculus OX=10090 GN=Ktn1 PE=1 SV=1;tr|A0A087WP48|A0A087WP48_MOUSE Kinectin OS=Mus musculus OX=10090 GN=Ktn1 PE=1 SV=1;tr|A0A087WS04|A0A087WS04_MOUSE Kinectin OS=Mus musculus OX=10090 GN=Ktn1 PE=1 SV=1;tr|A0A0	20	7	7	7	137.63	1200	52.773	1.3	7	1309900	218110000	166.509
A0A0A0MQ76;Q6DFW4;A0A087WSU5;A0A087WNW0;A0A087WSL8;A0A087WQ46;A0A087WP00	Nucleolar protein 58	Nop58	tr|A0A0A0MQ76|A0A0A0MQ76_MOUSE Nucleolar protein 58 OS=Mus musculus OX=10090 GN=Nop58 PE=1 SV=1;sp|Q6DFW4|NOP58_MOUSE Nucleolar protein 58 OS=Mus musculus OX=10090 GN=Nop58 PE=1 SV=1	7	7	7	15.3	50.063	444	51.476	12.8	15.3	260630000	521840000	2.00223
A0A0A6YW80;G3X8Y3;Q80UM3;A0A0A6YX86;A0A0A6YXF4;Q8K2S4	N-alpha-acetyltransferase 15, NatA auxiliary subunit	Naa15	tr|A0A0A6YW80|A0A0A6YW80_MOUSE N-alpha-acetyltransferase 15, NatA auxiliary subunit OS=Mus musculus OX=10090 GN=Naa15 PE=1 SV=1;tr|G3X8Y3|G3X8Y3_MOUSE N-alpha-acetyltransferase 15, NatA auxiliary subunit OS=Mus musculus OX=10090 GN=Naa15 PE=1 SV=1;sp|Q80UM	6	7	7	10.7	95.295	815	49.281	10.7	2.5	184470000	43384000	0.235182
A0A0R4J049;Q8CIG8;A0A2I3BRG2;S4R295	Protein arginine N-methyltransferase 5 (EC 2.1.1.-)	Prmt5	tr|A0A0R4J049|A0A0R4J049_MOUSE Protein arginine N-methyltransferase 5 OS=Mus musculus OX=10090 GN=Prmt5 PE=1 SV=1;sp|Q8CIG8|ANM5_MOUSE Protein arginine N-methyltransferase 5 OS=Mus musculus OX=10090 GN=Prmt5 PE=1 SV=3	4	7	7	15.5	72.737	637	49.093	14.1	8.6	231290000	85323000	0.368901
Q3TSS0;A0A0U1RNT6;Q3UZA2;A0A0U1RNK6;Q99J57;Q3THS6;Q3UAP7;Q6PE05;Q3TED1;A0A0U1RQ95;A0A0U1RQB0;Q91X83	S-adenosylmethionine synthase (EC 2.5.1.6)	Mat2a	tr|Q3TSS0|Q3TSS0_MOUSE S-adenosylmethionine synthase OS=Mus musculus OX=10090 GN=Mat2a PE=2 SV=1;tr|A0A0U1RNT6|A0A0U1RNT6_MOUSE S-adenosylmethionine synthase OS=Mus musculus OX=10090 GN=Mat2a PE=1 SV=1;tr|Q3UZA2|Q3UZA2_MOUSE S-adenosylmethionine synthase O	12	7	7	27.6	39.754	362	76.227	23.5	27.6	301290000	310710000	1.03127
A0A140LHA2;Q9WVA3;A0A140LIM5;A0A140LJ21;A0A140LI47	Mitotic checkpoint protein BUB3	Bub3	tr|A0A140LHA2|A0A140LHA2_MOUSE Mitotic checkpoint protein BUB3 OS=Mus musculus OX=10090 GN=Bub3 PE=1 SV=1;sp|Q9WVA3|BUB3_MOUSE Mitotic checkpoint protein BUB3 OS=Mus musculus OX=10090 GN=Bub3 PE=1 SV=2	5	7	7	27.2	36.766	324	80.171	24.1	27.2	565730000	230770000	0.407915
S4R1L5;S4R2P8;A0A1S6GWH3;A0A1S6GWH6;O88738;S4R268;Q3UYZ6;J3QP64	Baculoviral IAP repeat-containing protein 6	Birc6	tr|S4R1L5|S4R1L5_MOUSE Baculoviral IAP repeat-containing protein 6 OS=Mus musculus OX=10090 GN=Birc6 PE=1 SV=1;tr|S4R2P8|S4R2P8_MOUSE Baculoviral IAP repeat-containing protein 6 OS=Mus musculus OX=10090 GN=Birc6 PE=1 SV=1;tr|A0A1S6GWH3|A0A1S6GWH3_MOUSE UBC	8	7	7	2	529.32	4853	48.211	1.8	1.7	65503000	36910000	0.563486
Q642K0;A0A1W2P6F6;A0A1W2P7Q9;Q60605;A0A1W2P6G5;Q3TIG9;B0LAC7;Q8CI43	Myl6 protein (Myosin, light polypeptide 6, alkali, smooth muscle and non-muscle)	Myl6	tr|Q642K0|Q642K0_MOUSE Myl6 protein OS=Mus musculus OX=10090 GN=Myl6 PE=2 SV=1;tr|A0A1W2P6F6|A0A1W2P6F6_MOUSE Myosin light polypeptide 6 OS=Mus musculus OX=10090 GN=Myl6 PE=1 SV=1;tr|A0A1W2P7Q9|A0A1W2P7Q9_MOUSE Myosin light polypeptide 6 OS=Mus musculus OX	8	7	7	45	16.961	151	67.623	45	45	1749600000	1278500000	0.730738
Q922A2;Q3TJ49;A0A2C9F2D2;Q07076;Q3UYL7;Q8CCV9;Q8BP75;A0A286YCW4	Annexin	Anxa7	tr|Q922A2|Q922A2_MOUSE Annexin OS=Mus musculus OX=10090 GN=Anxa7 PE=2 SV=1;tr|Q3TJ49|Q3TJ49_MOUSE Annexin OS=Mus musculus OX=10090 GN=Anxa7 PE=2 SV=1;tr|A0A2C9F2D2|A0A2C9F2D2_MOUSE Annexin OS=Mus musculus OX=10090 GN=Anxa7 PE=1 SV=1;sp|Q07076|ANXA7_MOUSE A	8	7	7	16	49.909	463	47.326	16	16	149660000	327480000	2.18816
Q3U8R9;A0A498WGD8;Q3UNH3;Q8CDN6;A0A494BBI1;A0A494B955;Q3UBF4;A0A494BB31	PITH domain-containing protein	Txnl1	tr|Q3U8R9|Q3U8R9_MOUSE PITH domain-containing protein OS=Mus musculus OX=10090 GN=Txnl1 PE=2 SV=1;tr|A0A498WGD8|A0A498WGD8_MOUSE Thioredoxin-like protein 1 OS=Mus musculus OX=10090 GN=Txnl1 PE=1 SV=1;tr|Q3UNH3|Q3UNH3_MOUSE PITH domain-containing protein (F	8	7	7	38.8	32.179	289	61.674	38.8	38.8	607290000	508020000	0.836536
Q8BQW4;A2AH25;Q5FWK3;A0A2X0SSA9;Q8C5A0;Q91Z04	Uncharacterized protein	Arhgap1	tr|Q8BQW4|Q8BQW4_MOUSE Uncharacterized protein OS=Mus musculus OX=10090 GN=Arhgap1 PE=2 SV=1;tr|A2AH25|A2AH25_MOUSE Rho GTPase-activating protein 1 OS=Mus musculus OX=10090 GN=Arhgap1 PE=1 SV=1;sp|Q5FWK3|RHG01_MOUSE Rho GTPase-activating protein 1 OS=Mus m	6	7	7	15	54.441	479	47.624	12.1	15	77871000	293210000	3.76533
Q3UNN2;Q3U8S1;Q3U468;A2APM5;A2APM3;A2APM4;E9QKM8;Q80X37;A2APM1;A2APM2;P15379;Q3TLT9	CD44 antigen (Extracellular matrix receptor III) (GP90 lymphocyte homing/adhesion receptor) (HUTCH-I) (Hermes antigen) (Hyaluronate receptor) (Phagocytic glycoprotein 1) (Phagocytic glycoprotein I)	Cd44	tr|Q3UNN2|Q3UNN2_MOUSE CD44 antigen OS=Mus musculus OX=10090 GN=Cd44 PE=2 SV=1;tr|Q3U8S1|Q3U8S1_MOUSE CD44 antigen OS=Mus musculus OX=10090 GN=Cd44 PE=1 SV=1;tr|Q3U468|Q3U468_MOUSE CD44 antigen OS=Mus musculus OX=10090 GN=Cd44 PE=2 SV=1;tr|A2APM5|A2APM5_MO	12	7	7	19.7	40.247	365	64.821	16.7	16.7	920940000	783310000	0.850555
B1AZI6;Q3UUT9;Q3US09;F6SBF2;Q8C690;Q3UYT9;E9Q5E2	THO complex subunit 2 (Tho2)	Thoc2	sp|B1AZI6|THOC2_MOUSE THO complex subunit 2 OS=Mus musculus OX=10090 GN=Thoc2 PE=1 SV=1;tr|Q3UUT9|Q3UUT9_MOUSE THOC2_N domain-containing protein OS=Mus musculus OX=10090 GN=Thoc2 PE=2 SV=1	7	7	7	5.6	182.77	1594	47.436	4	5.6	89569000	201450000	2.2491
B2M1R7;Q61990;A0A2R8W6L5;Q3TF69;A0A2R8VI25;A0A2R8VHG2;A0A2R8VI71;A0A2R8VHY9;A0A2R8VI12;Q3TT81;A0A2R8VHP9;A0A2R8VHN3;A0A2R8VJY1;A0A2R8VHZ0;A0A2R8VKN0;A0A2R8VI73;A0A2R8VKF0;A0A2R8VHL8;E9Q7D8;Q8CFQ6;A0A2R8W6U6;P57722;A0A2R8VHI3;A0A2R8VI92;A0A2R8VI15;A0A2R8W6H3;Q3V486;G3UYM5	Poly(rC)-binding protein 2	Pcbp2	tr|B2M1R7|B2M1R7_MOUSE Poly(rC)-binding protein 2 OS=Mus musculus OX=10090 GN=Pcbp2 PE=1 SV=1;sp|Q61990|PCBP2_MOUSE Poly(rC)-binding protein 2 OS=Mus musculus OX=10090 GN=Pcbp2 PE=1 SV=1;tr|A0A2R8W6L5|A0A2R8W6L5_MOUSE Poly(rC)-binding protein 2 (Fragment)	28	10	7	39.3	38.15	361	89.607	39.3	32.1	505950000	913450000	1.80542
B2RTM0;P62806;Q61667;Q6B822	Histone H4	Hist2h4 Hist1h4c Hist1h4m RP23-38E20.3 RP23-283N14.21-001 RP23-38E20.3-001 RP23-38E20.4-001	tr|B2RTM0|B2RTM0_MOUSE Histone H4 OS=Mus musculus OX=10090 GN=Hist2h4 PE=1 SV=1;sp|P62806|H4_MOUSE Histone H4 OS=Mus musculus OX=10090 GN=H4c1 PE=1 SV=2;tr|Q61667|Q61667_MOUSE Histone H4 (Fragment) OS=Mus musculus OX=10090 PE=3 SV=1	4	7	7	52.4	11.367	103	88.055	43.7	52.4	1769500000	32844000000	18.5612
B2RXS4;Q8CHG6;Q99LF0;Q8K2J5	Plexin-B2	Plxnb2	sp|B2RXS4|PLXB2_MOUSE Plexin-B2 OS=Mus musculus OX=10090 GN=Plxnb2 PE=1 SV=1;tr|Q8CHG6|Q8CHG6_MOUSE MKIAA0315 protein (Fragment) OS=Mus musculus OX=10090 GN=mKIAA0315 PE=3 SV=2	4	7	7	6.2	206.23	1842	51.758	5.6	6.2	133160000	97888000	0.735116
B9EHD0;Q8K1T1	Leucine rich repeat containing 25	Lrrc25	tr|B9EHD0|B9EHD0_MOUSE Leucine rich repeat containing 25 OS=Mus musculus OX=10090 GN=Lrrc25 PE=1 SV=1;sp|Q8K1T1|LRC25_MOUSE Leucine-rich repeat-containing protein 25 OS=Mus musculus OX=10090 GN=Lrrc25 PE=1 SV=1	2	7	7	36	32.673	297	86.234	36	19.2	669520000	230590000	0.344411
D3Z061;Q8C7R4	E1 ubiquitin-activating enzyme (EC 6.2.1.45)	Uba6	tr|D3Z061|D3Z061_MOUSE E1 ubiquitin-activating enzyme OS=Mus musculus OX=10090 GN=Uba6 PE=1 SV=1;sp|Q8C7R4|UBA6_MOUSE Ubiquitin-like modifier-activating enzyme 6 OS=Mus musculus OX=10090 GN=Uba6 PE=1 SV=1	2	7	7	8.2	114.77	1022	53.936	8.2	5.6	155390000	97721000	0.628876
E9Q9H2;P54103;E9Q9H3;Q3TTI5;Q3UVT4;Q3TTG9;Q3TRX6;Q3TE39	DnaJ homolog subfamily C member 2 (Zuotin-related factor 1)	Dnajc2	tr|E9Q9H2|E9Q9H2_MOUSE DnaJ homolog subfamily C member 2 OS=Mus musculus OX=10090 GN=Dnajc2 PE=1 SV=1;sp|P54103|DNJC2_MOUSE DnaJ homolog subfamily C member 2 OS=Mus musculus OX=10090 GN=Dnajc2 PE=1 SV=2;tr|E9Q9H3|E9Q9H3_MOUSE DnaJ homolog subfamily C membe	8	7	7	16.5	63.44	547	59.003	5.7	16.5	19487000	198240000	10.1729
Q6ZWZ6;F7AEH4;A0A1W2P7A1;P63323	40S ribosomal protein S12	Rps12	tr|Q6ZWZ6|Q6ZWZ6_MOUSE 40S ribosomal protein S12 OS=Mus musculus OX=10090 GN=Rps12 PE=1 SV=1;tr|F7AEH4|F7AEH4_MOUSE 40S ribosomal protein S12 OS=Mus musculus OX=10090 GN=Rps12 PE=1 SV=1;tr|A0A1W2P7A1|A0A1W2P7A1_MOUSE 40S ribosomal protein S12 OS=Mus muscul	4	7	7	69.7	14.515	132	48.626	69.7	69.7	469850000	832140000	1.77108
Q99J48;Q548T0;F8WGM5;Q64324	Stxbp2 protein (Fragment)	Stxbp2	tr|Q99J48|Q99J48_MOUSE Stxbp2 protein (Fragment) OS=Mus musculus OX=10090 GN=Stxbp2 PE=2 SV=1;tr|Q548T0|Q548T0_MOUSE Syntaxin binding protein Munc18-2 OS=Mus musculus OX=10090 GN=Stxbp2 PE=1 SV=1;tr|F8WGM5|F8WGM5_MOUSE Syntaxin-binding protein 2 (Fragment)	4	7	7	19.4	66.313	593	70.513	19.4	15.3	111780000	35231000	0.315182
G3UXX3;Q91XH5;Q64105;G3UZ79	Sepiapterin reductase	Spr	tr|G3UXX3|G3UXX3_MOUSE Sepiapterin reductase OS=Mus musculus OX=10090 GN=Spr PE=1 SV=1;tr|Q91XH5|Q91XH5_MOUSE Sepiapterin reductase OS=Mus musculus OX=10090 GN=Spr PE=1 SV=1;sp|Q64105|SPRE_MOUSE Sepiapterin reductase OS=Mus musculus OX=10090 GN=Spr PE=1 SV	4	7	7	45.2	23.357	219	62.945	45.2	22.4	220760000	62324000	0.282316
O70194;A0A2R8VK20	Eukaryotic translation initiation factor 3 subunit D (eIF3d) (Eukaryotic translation initiation factor 3 subunit 7) (eIF-3-zeta) (eIF3 p66)	Eif3d Eif3s7	sp|O70194|EIF3D_MOUSE Eukaryotic translation initiation factor 3 subunit D OS=Mus musculus OX=10090 GN=Eif3d PE=1 SV=2	2	7	7	19.5	63.988	548	68.862	19.5	17.9	456800000	191220000	0.418608
Q9Z2P7;Q91XH6;O88384;Q3TUP8;F6UHS3;E0CYE5;F6T4B9	GES30	Vti1b	tr|Q9Z2P7|Q9Z2P7_MOUSE GES30 OS=Mus musculus OX=10090 GN=Vti1b PE=2 SV=1;tr|Q91XH6|Q91XH6_MOUSE Vesicle transport through interaction with t-SNAREs 1B homolog OS=Mus musculus OX=10090 GN=Vti1b PE=1 SV=1;sp|O88384|VTI1B_MOUSE Vesicle transport through inter	7	7	7	39	26.481	231	62.304	34.6	39	219480000	377860000	1.72161
P06745;B7ZWL9;B2RXT5;A0A0U1RQ72;A0A0U1RP97;A0A0U1RQ18	Glucose-6-phosphate isomerase (GPI) (EC 5.3.1.9) (Autocrine motility factor) (AMF) (Neuroleukin) (NLK) (Phosphoglucose isomerase) (PGI) (Phosphohexose isomerase) (PHI)	Gpi Gpi1	sp|P06745|G6PI_MOUSE Glucose-6-phosphate isomerase OS=Mus musculus OX=10090 GN=Gpi PE=1 SV=4;tr|B7ZWL9|B7ZWL9_MOUSE Glucose-6-phosphate isomerase OS=Mus musculus OX=10090 GN=Gpi1 PE=2 SV=1;tr|B2RXT5|B2RXT5_MOUSE Glucose-6-phosphate isomerase OS=Mus musculu	6	7	7	14.5	62.766	558	50.209	14.5	10.8	391200000	152920000	0.3909
P08752;A0A0A6YWA9;B2RSH2;Q8JZT4;Q922Y6	Guanine nucleotide-binding protein G(i) subunit alpha-2 (Adenylate cyclase-inhibiting G alpha protein)	Gnai2 Gnai-2	sp|P08752|GNAI2_MOUSE Guanine nucleotide-binding protein G(i) subunit alpha-2 OS=Mus musculus OX=10090 GN=Gnai2 PE=1 SV=5;tr|A0A0A6YWA9|A0A0A6YWA9_MOUSE Guanine nucleotide-binding protein G(i) subunit alpha-2 (Fragment) OS=Mus musculus OX=10090 GN=Gnai2 PE	5	10	7	38.9	40.489	355	104.01	38.9	29.9	1543400000	1062000000	0.688091
Q3TVS6;Q3TC17;P10605;Q6LAF6	Cathepsin B (EC 3.4.22.1) (Cathepsin B heavy chain) (Cathepsin B light chain)	Ctsb	tr|Q3TVS6|Q3TVS6_MOUSE Cathepsin B OS=Mus musculus OX=10090 GN=Ctsb PE=2 SV=1;tr|Q3TC17|Q3TC17_MOUSE Cathepsin B OS=Mus musculus OX=10090 GN=Ctsb PE=2 SV=1;sp|P10605|CATB_MOUSE Cathepsin B OS=Mus musculus OX=10090 GN=Ctsb PE=1 SV=2;tr|Q6LAF6|Q6LAF6_MOUSE C	4	7	7	25.1	37.319	339	64.351	25.1	21.2	694280000	467980000	0.674051
Q920X9;Q920X8;Q91VD3;Q91VC2;Q91V69;Q4FJP7;Q3U6A3;P10810;Q920X7;Q3UE54;Q3UB18;Q3TE16	Monocyte differentiation antigen CD14 (Myeloid cell-specific leucine-rich glycoprotein) (Fragment)	CD14	tr|Q920X9|Q920X9_MOUSE Monocyte differentiation antigen CD14 (Fragment) OS=Mus musculus OX=10090 GN=CD14 PE=4 SV=1;tr|Q920X8|Q920X8_MOUSE Monocyte differentiation antigen CD14 (Fragment) OS=Mus musculus OX=10090 GN=CD14 PE=4 SV=1;tr|Q91VD3|Q91VD3_MOUSE Mon	12	7	7	23	38.049	356	70.825	23	20.2	359510000	303350000	0.843787
Q80YP5;P11688;Q3U7M6	Integrin alpha 5 (Fibronectin receptor alpha)	Itga5	tr|Q80YP5|Q80YP5_MOUSE Integrin alpha 5 (Fibronectin receptor alpha) OS=Mus musculus OX=10090 GN=Itga5 PE=2 SV=1;sp|P11688|ITA5_MOUSE Integrin alpha-5 OS=Mus musculus OX=10090 GN=Itga5 PE=1 SV=3;tr|Q3U7M6|Q3U7M6_MOUSE Uncharacterized protein (Fragment) OS=	3	7	7	9.3	115.01	1053	70.003	9.3	7.6	406010000	217340000	0.535307
Q3TDU5;P21956;Q9QWQ1	Uncharacterized protein	Mfge8	tr|Q3TDU5|Q3TDU5_MOUSE Uncharacterized protein OS=Mus musculus OX=10090 GN=Mfge8 PE=2 SV=1;sp|P21956|MFGM_MOUSE Lactadherin OS=Mus musculus OX=10090 GN=Mfge8 PE=1 SV=3	3	7	7	23.9	47.197	426	53.514	23.9	15.5	210980000	259060000	1.22789
Q922I0;Q3KQM4;Q505Q1;Q80XR5;P26369	U2 snRNP auxiliary factor large subunit	U2af2	tr|Q922I0|Q922I0_MOUSE U2 snRNP auxiliary factor large subunit OS=Mus musculus OX=10090 GN=U2af2 PE=2 SV=1;tr|Q3KQM4|Q3KQM4_MOUSE U2 snRNP auxiliary factor large subunit OS=Mus musculus OX=10090 GN=U2af2 PE=1 SV=1;tr|Q505Q1|Q505Q1_MOUSE U2 snRNP auxiliary	5	7	7	34	33.77	306	51.712	34	34	277140000	366140000	1.32114
P27046	Alpha-mannosidase 2 (EC 3.2.1.114) (Golgi alpha-mannosidase II) (AMan II) (Man II) (Mannosidase alpha class 2A member 1) (Mannosyl-oligosaccharide 1,3-1,6-alpha-mannosidase)	Man2a1 Mana2	sp|P27046|MA2A1_MOUSE Alpha-mannosidase 2 OS=Mus musculus OX=10090 GN=Man2a1 PE=1 SV=2	1	7	7	7.3	131.63	1150	54.906	2.3	7.3	22902000	232050000	10.1323
Q3UE40;P27601;Q9D034;Q8C5L2	Uncharacterized protein	Gna13	tr|Q3UE40|Q3UE40_MOUSE Uncharacterized protein OS=Mus musculus OX=10090 GN=Gna13 PE=2 SV=1;sp|P27601|GNA13_MOUSE Guanine nucleotide-binding protein subunit alpha-13 OS=Mus musculus OX=10090 GN=Gna13 PE=1 SV=1	4	7	7	21	44.038	377	58.753	18.3	15.4	266890000	205750000	0.770917
P27612;F7D1R5	Phospholipase A-2-activating protein (PLA2P) (PLAP)	Plaa Plap	sp|P27612|PLAP_MOUSE Phospholipase A-2-activating protein OS=Mus musculus OX=10090 GN=Plaa PE=1 SV=4	2	7	7	11.2	87.22	794	58.438	11.2	2.6	170830000	54597000	0.319598
Q8BTU4;Q564E6;Q3TG93;P32067;A2AR07;Q9CYB9;D6RI87;F6SXM5	Uncharacterized protein	Ssb	tr|Q8BTU4|Q8BTU4_MOUSE Uncharacterized protein OS=Mus musculus OX=10090 GN=Ssb PE=2 SV=1;tr|Q564E6|Q564E6_MOUSE Ssb protein OS=Mus musculus OX=10090 GN=Ssb PE=1 SV=1;tr|Q3TG93|Q3TG93_MOUSE Uncharacterized protein OS=Mus musculus OX=10090 GN=Ssb PE=2 SV=1;s	8	7	7	20.2	47.657	415	46.598	18.3	13.3	133950000	208560000	1.557
Q91YS2;Q8C2E3;Q7TMW1;Q6ZPH4;P46061;Q3ULJ9;Q3UZD8;A0A2R8VHK9;A0A2R8W753	Rangap1 protein	Rangap1	tr|Q91YS2|Q91YS2_MOUSE Rangap1 protein OS=Mus musculus OX=10090 GN=Rangap1 PE=2 SV=1;tr|Q8C2E3|Q8C2E3_MOUSE RanGAP1_C domain-containing protein OS=Mus musculus OX=10090 GN=Rangap1 PE=2 SV=1;tr|Q7TMW1|Q7TMW1_MOUSE Rangap1 protein OS=Mus musculus OX=10090 GN	9	7	7	18.3	63.516	589	62.386	18.3	14.4	228980000	125410000	0.54769
Q9D077;Q921D5;Q542F4;Q3UA65;P49717;Q5DTS8;Q8C1Z0;A0A2R8VHP7;Q3UXG9	DNA helicase (EC 3.6.4.12)	Mcm4	tr|Q9D077|Q9D077_MOUSE DNA helicase OS=Mus musculus OX=10090 GN=Mcm4 PE=2 SV=1;tr|Q921D5|Q921D5_MOUSE DNA helicase OS=Mus musculus OX=10090 GN=Mcm4 PE=2 SV=1;tr|Q542F4|Q542F4_MOUSE DNA helicase OS=Mus musculus OX=10090 GN=Mcm4 PE=1 SV=1;tr|Q3UA65|Q3UA65_MO	9	7	7	10.9	96.764	862	51.242	8.2	10.9	160940000	216090000	1.34267
Q8BQ03;P49718;Q8C2I9	DNA helicase (EC 3.6.4.12)	Mcm5	tr|Q8BQ03|Q8BQ03_MOUSE DNA helicase OS=Mus musculus OX=10090 GN=Mcm5 PE=2 SV=1;sp|P49718|MCM5_MOUSE DNA replication licensing factor MCM5 OS=Mus musculus OX=10090 GN=Mcm5 PE=1 SV=2	3	7	7	12.1	82.348	734	54.212	5.7	12.1	73738000	208730000	2.8307
P50518;A0A0N4SW07;A0A0N4SW34;Q9D593;A0A0N4SWA3	V-type proton ATPase subunit E 1 (V-ATPase subunit E 1) (V-ATPase 31 kDa subunit) (p31) (Vacuolar proton pump subunit E 1)	Atp6v1e1 Atp6e Atp6e2	sp|P50518|VATE1_MOUSE V-type proton ATPase subunit E 1 OS=Mus musculus OX=10090 GN=Atp6v1e1 PE=1 SV=2;tr|A0A0N4SW07|A0A0N4SW07_MOUSE V-type proton ATPase subunit E 1 (Fragment) OS=Mus musculus OX=10090 GN=Atp6v1e1 PE=1 SV=1	5	7	7	27.9	26.157	226	54.842	15.5	27.9	174330000	1783000000	10.2277
Q545A2;P51881	ADP/ATP translocase (ADP,ATP carrier protein)	Slc25a5	tr|Q545A2|Q545A2_MOUSE ADP/ATP translocase OS=Mus musculus OX=10090 GN=Slc25a5 PE=1 SV=1;sp|P51881|ADT2_MOUSE ADP/ATP translocase 2 OS=Mus musculus OX=10090 GN=Slc25a5 PE=1 SV=3	2	9	7	27.5	32.931	298	70.817	19.8	27.5	145960000	4843000000	33.1803
Q3TD54;Q3T9E5;Q6ZQF2;P57716;Q3TDE4;Q3TV74	Nicastrin	Ncstn	tr|Q3TD54|Q3TD54_MOUSE Nicastrin OS=Mus musculus OX=10090 GN=Ncstn PE=2 SV=1;tr|Q3T9E5|Q3T9E5_MOUSE Nicastrin OS=Mus musculus OX=10090 GN=Ncstn PE=2 SV=1;tr|Q6ZQF2|Q6ZQF2_MOUSE Nicastrin (Fragment) OS=Mus musculus OX=10090 GN=Ncstn PE=2 SV=1;sp|P57716|NICA	6	7	7	12.1	78.392	708	68.059	12.1	8.3	275220000	407620000	1.48107
P57784;G5E883;Q8BSH5;A0A0U1RNZ6	U2 small nuclear ribonucleoprotein A' (U2 snRNP A')	Snrpa1	sp|P57784|RU2A_MOUSE U2 small nuclear ribonucleoprotein A OS=Mus musculus OX=10090 GN=Snrpa1 PE=1 SV=2;tr|G5E883|G5E883_MOUSE U2 small nuclear ribonucleoprotein A OS=Mus musculus OX=10090 GN=Snrpa1 PE=1 SV=1	4	7	7	32.9	28.357	255	64.369	27.8	32.9	115470000	195460000	1.69273
Q3TLX9;P58242;Q8BTC9	Acid sphingomyelinase-like phosphodiesterase	Smpdl3b	tr|Q3TLX9|Q3TLX9_MOUSE Acid sphingomyelinase-like phosphodiesterase OS=Mus musculus OX=10090 GN=Smpdl3b PE=1 SV=1;sp|P58242|ASM3B_MOUSE Acid sphingomyelinase-like phosphodiesterase 3b OS=Mus musculus OX=10090 GN=Smpdl3b PE=1 SV=1	3	7	7	21.1	51.599	456	64.635	21.1	18.9	1380200000	473640000	0.343168
Q5SS40;P62259;Q8BPH1;D6REF3;F6WA09;Q3V453	14_3_3 domain-containing protein	Ywhae	tr|Q5SS40|Q5SS40_MOUSE 14_3_3 domain-containing protein OS=Mus musculus OX=10090 GN=Ywhae PE=1 SV=1;sp|P62259|1433E_MOUSE 14-3-3 protein epsilon OS=Mus musculus OX=10090 GN=Ywhae PE=1 SV=1;tr|Q8BPH1|Q8BPH1_MOUSE 14_3_3 domain-containing protein OS=Mus musc	6	10	7	44.7	29.174	255	78.353	42	44.7	1371800000	579430000	0.422387
Q14AF6;P62317	Small nuclear ribonucleoprotein Sm D2 (Sm-D2) (snRNP core protein D2)	Snrpd2 SNRPD2	tr|Q14AF6|Q14AF6_MOUSE Small nuclear ribonucleoprotein Sm D2 OS=Mus musculus OX=10090 GN=Snrpd2 PE=1 SV=1;sp|P62317|SMD2_MOUSE Small nuclear ribonucleoprotein Sm D2 OS=Mus musculus OX=10090 GN=Snrpd2 PE=1 SV=1	2	7	7	55.1	13.527	118	63.127	55.1	49.2	295230000	538250000	1.82315
Q642L7;P62983;A5JUZ1;A0A0A6YW67;E9Q9J0;Q5M9K3;Q8C2K3;E9Q4P0;E9Q5F6;Q922B0;E9QNP0;Q5SX22;Q3TH47;Q78XY9;Q8R0Z9;Q922Z8;Q8VC46;P62984;P0CG49;P0CG50;B0LAC2;Q3TWD1	40S ribosomal protein S27a (Ubiquitin carboxyl extension protein 80) (Ubiquitin-40S ribosomal protein S27a)	Rps27a	tr|Q642L7|Q642L7_MOUSE 40S ribosomal protein S27a OS=Mus musculus OX=10090 GN=Rps27a PE=2 SV=1;sp|P62983|RS27A_MOUSE Ubiquitin-40S ribosomal protein S27a OS=Mus musculus OX=10090 GN=Rps27a PE=1 SV=2;tr|A5JUZ1|A5JUZ1_MOUSE Ubiqutin subunit 1 (Fragment) OS=M	22	7	7	50.6	17.951	156	67.029	50.6	50.6	4269700000	3722300000	0.871794
P63101;A0A2I3BQ03;D3YXN6;Q3UA58;Q8BWN0;D3YXF4	14-3-3 protein zeta/delta (Protein kinase C inhibitor protein 1) (KCIP-1) (SEZ-2)	Ywhaz	sp|P63101|1433Z_MOUSE 14-3-3 protein zeta/delta OS=Mus musculus OX=10090 GN=Ywhaz PE=1 SV=1;tr|A0A2I3BQ03|A0A2I3BQ03_MOUSE 14-3-3 protein zeta/delta (Fragment) OS=Mus musculus OX=10090 GN=Ywhaz PE=1 SV=1	6	11	7	53.1	27.771	245	108.64	50.2	53.1	1918700000	1016400000	0.529734
Q5M9L7;Q8BT90;P63276;Q3TK12	40S ribosomal protein S17	Rps17	tr|Q5M9L7|Q5M9L7_MOUSE 40S ribosomal protein S17 OS=Mus musculus OX=10090 GN=Rps17 PE=1 SV=1;tr|Q8BT90|Q8BT90_MOUSE 40S ribosomal protein S17 (Fragment) OS=Mus musculus OX=10090 GN=Rps17 PE=2 SV=1;sp|P63276|RS17_MOUSE 40S ribosomal protein S17 OS=Mus muscu	4	7	7	33.3	15.524	135	46.509	25.2	33.3	290260000	1110600000	3.82622
Q8BW03;Q8BM84;Q3UFF9;P70372;Q8BTQ1;Q8BVF8;Q3TT05	ELAV-like protein	Elavl1	tr|Q8BW03|Q8BW03_MOUSE ELAV-like protein OS=Mus musculus OX=10090 GN=Elavl1 PE=2 SV=1;tr|Q8BM84|Q8BM84_MOUSE ELAV-like protein OS=Mus musculus OX=10090 GN=Elavl1 PE=2 SV=1;tr|Q3UFF9|Q3UFF9_MOUSE ELAV-like protein OS=Mus musculus OX=10090 GN=Elavl1 PE=2 SV=	7	7	7	28.5	36.153	326	52.004	28.5	28.5	222840000	549820000	2.46733
Q3TWV4;Q5FWI9;Q6A0C9;P84091;Q3UCW9;Q3TH69;A0A338P6T4	AP-2 complex subunit mu	Ap2m1	tr|Q3TWV4|Q3TWV4_MOUSE AP-2 complex subunit mu OS=Mus musculus OX=10090 GN=Ap2m1 PE=1 SV=1;tr|Q5FWI9|Q5FWI9_MOUSE AP-2 complex subunit mu OS=Mus musculus OX=10090 GN=Ap2m1 PE=1 SV=1;tr|Q6A0C9|Q6A0C9_MOUSE AP-2 complex subunit mu (Fragment) OS=Mus musculus	7	7	7	16.2	49.389	433	68.015	14.3	16.2	441210000	293190000	0.664513
Q3UDZ1;P84096;A0A1B0GSL4;B2KKU6	Uncharacterized protein	Rhog	tr|Q3UDZ1|Q3UDZ1_MOUSE Uncharacterized protein OS=Mus musculus OX=10090 GN=Rhog PE=1 SV=1;sp|P84096|RHOG_MOUSE Rho-related GTP-binding protein RhoG OS=Mus musculus OX=10090 GN=Rhog PE=1 SV=1	4	8	7	50.3	21.308	191	65.547	40.3	41.4	281670000	297800000	1.05727
Q790Y8;Q00612;Q3TNL1;A3KG36;REV__Q3TIW4;REV__P46662	Glucose-6-phosphate 1-dehydrogenase (EC 1.1.1.49)	G6pdx RP23-436K3.17-001	tr|Q790Y8|Q790Y8_MOUSE Glucose-6-phosphate 1-dehydrogenase OS=Mus musculus OX=10090 GN=G6pdx PE=1 SV=1;sp|Q00612|G6PD1_MOUSE Glucose-6-phosphate 1-dehydrogenase X OS=Mus musculus OX=10090 GN=G6pdx PE=1 SV=3;tr|Q3TNL1|Q3TNL1_MOUSE Glucose-6-phosphate 1-dehy	6	12	7	24.1	59.262	515	104.83	24.1	12.6	677190000	174660000	0.257919
Q3TD71;Q8K021;Q3UY11;Q9D577;Q3TSA8;D3YTP4	Secretory carrier-associated membrane protein (Secretory carrier membrane protein)	Scamp1	tr|Q3TD71|Q3TD71_MOUSE Secretory carrier-associated membrane protein OS=Mus musculus OX=10090 GN=Scamp1 PE=1 SV=1;sp|Q8K021|SCAM1_MOUSE Secretory carrier-associated membrane protein 1 OS=Mus musculus OX=10090 GN=Scamp1 PE=1 SV=1;tr|Q3UY11|Q3UY11_MOUSE Secr	6	7	7	32	38.028	338	64.46	29.6	28.1	270700000	435040000	1.60709
Q4FK11;Q3TFC2;Q3UM20;Q3TF40;Q99K48;Q3TTV7;Q3TMM5;B1AXT0	Nono protein	Nono	tr|Q4FK11|Q4FK11_MOUSE Nono protein OS=Mus musculus OX=10090 GN=Nono PE=2 SV=1;tr|Q3TFC2|Q3TFC2_MOUSE Uncharacterized protein OS=Mus musculus OX=10090 GN=Nono PE=2 SV=1;tr|Q3UM20|Q3UM20_MOUSE Uncharacterized protein OS=Mus musculus OX=10090 GN=Nono PE=2 SV	8	8	7	21.1	54.54	473	63.083	18.8	21.1	190120000	429040000	2.25668
Q3TFA9;Q9JHJ0;Q8C3Z3;A0A1L1SQ12;A0A1L1SR42	Uncharacterized protein	Tmod3	tr|Q3TFA9|Q3TFA9_MOUSE Uncharacterized protein OS=Mus musculus OX=10090 GN=Tmod3 PE=2 SV=1;sp|Q9JHJ0|TMOD3_MOUSE Tropomodulin-3 OS=Mus musculus OX=10090 GN=Tmod3 PE=1 SV=1;tr|Q8C3Z3|Q8C3Z3_MOUSE Uncharacterized protein (Fragment) OS=Mus musculus OX=10090 G	5	7	7	25.9	39.472	352	43.235	23	25.9	123960000	121760000	0.982252
Q3UDI8;Q3U4T8;Q3V122;Q61881;D3Z6N3	DNA replication licensing factor MCM7 (EC 3.6.4.12)	Mcm7 MCM7	tr|Q3UDI8|Q3UDI8_MOUSE DNA replication licensing factor MCM7 OS=Mus musculus OX=10090 GN=Mcm7 PE=2 SV=1;tr|Q3U4T8|Q3U4T8_MOUSE DNA replication licensing factor MCM7 OS=Mus musculus OX=10090 GN=Mcm7 PE=1 SV=1;tr|Q3V122|Q3V122_MOUSE DNA replication licensing	5	7	7	14.7	81.196	719	52.403	8.5	14.7	84543000	177090000	2.09467
Q8C2Q8;Q9D9D7;Q3UD06;Q91VR2;A2AKV1;A2AKV2;A2AKV3;A2AKU9;Q9ERA8;A2AKV0;Q9Z1F5	ATP synthase subunit gamma	Atp5c1	tr|Q8C2Q8|Q8C2Q8_MOUSE ATP synthase subunit gamma OS=Mus musculus OX=10090 GN=Atp5c1 PE=1 SV=1;tr|Q9D9D7|Q9D9D7_MOUSE ATP synthase subunit gamma OS=Mus musculus OX=10090 GN=Atp5c1 PE=2 SV=1;tr|Q3UD06|Q3UD06_MOUSE ATP synthase subunit gamma OS=Mus musculus	11	7	7	28.8	30.255	274	49.219	0	28.8	0	708780000	#DIV/0!
Q3ULL5;Q99L45;E0CXJ3	Eif2s2 protein	Eif2s2	tr|Q3ULL5|Q3ULL5_MOUSE Eif2s2 protein OS=Mus musculus OX=10090 GN=Eif2s2 PE=1 SV=1;sp|Q99L45|IF2B_MOUSE Eukaryotic translation initiation factor 2 subunit 2 OS=Mus musculus OX=10090 GN=Eif2s2 PE=1 SV=1	3	7	7	21.8	38.092	331	70.158	18.1	21.8	267240000	482420000	1.80519
Q3UMP4;Q9CY58;A0A0N4SV32;Q3UEI6;Q3UJK2;A0A0N4SWH2;Q3V274;A0A0N4SUQ1;A0A0N4SUN8;A0A0N4SV40;A0A0N4SVK5	Plasminogen activator inhibitor 1 RNA-binding protein	Serbp1	tr|Q3UMP4|Q3UMP4_MOUSE Plasminogen activator inhibitor 1 RNA-binding protein OS=Mus musculus OX=10090 GN=Serbp1 PE=1 SV=1;sp|Q9CY58|PAIRB_MOUSE Plasminogen activator inhibitor 1 RNA-binding protein OS=Mus musculus OX=10090 GN=Serbp1 PE=1 SV=2;tr|A0A0N4SV32	11	7	7	27.9	44.005	401	60.068	14.5	27.9	92651000	315930000	3.40989
Q3UR33;Q61029;Q3TNH0;Q3U955;Q3U7B3;Q78WP6;Q3TXQ1	Uncharacterized protein	Tmpo	tr|Q3UR33|Q3UR33_MOUSE Uncharacterized protein OS=Mus musculus OX=10090 GN=Tmpo PE=2 SV=1;sp|Q61029|LAP2B_MOUSE Lamina-associated polypeptide 2, isoforms beta/delta/epsilon/gamma OS=Mus musculus OX=10090 GN=Tmpo PE=1 SV=4;tr|Q3TNH0|Q3TNH0_MOUSE Uncharacter	7	14	7	43.6	50.358	452	142.07	1.8	43.6	29566000	1261000000	42.6503
Q3UW53;Q3TDH5;E9PYV4;D3Z233	Protein Niban 1 (Protein FAM129A) (Protein Niban)	Niban1 Fam129a Niban	sp|Q3UW53|NIBA1_MOUSE Protein Niban 1 OS=Mus musculus OX=10090 GN=Niban1 PE=1 SV=2;tr|Q3TDH5|Q3TDH5_MOUSE Uncharacterized protein OS=Mus musculus OX=10090 GN=Niban1 PE=2 SV=1;tr|E9PYV4|E9PYV4_MOUSE Protein Niban 1 OS=Mus musculus OX=10090 GN=Niban1 PE=1 SV	4	7	7	10	102.65	926	53.876	10	7	131330000	96602000	0.735567
Q3UX26;Q9DCE5	Uncharacterized protein (Fragment)	Pak1ip1	tr|Q3UX26|Q3UX26_MOUSE Uncharacterized protein (Fragment) OS=Mus musculus OX=10090 GN=Pak1ip1 PE=2 SV=1;sp|Q9DCE5|PK1IP_MOUSE p21-activated protein kinase-interacting protein 1 OS=Mus musculus OX=10090 GN=Pak1ip1 PE=1 SV=2	2	7	7	27	41.058	374	50.272	27	22.5	206260000	165340000	0.80161
Q4V9X1;Q9JJA4;D3Z369	Ribosome biogenesis protein WDR12 (WD repeat-containing protein 12)	Wdr12 WDR12	tr|Q4V9X1|Q4V9X1_MOUSE Ribosome biogenesis protein WDR12 OS=Mus musculus OX=10090 GN=Wdr12 PE=1 SV=1;sp|Q9JJA4|WDR12_MOUSE Ribosome biogenesis protein WDR12 OS=Mus musculus OX=10090 GN=Wdr12 PE=1 SV=1	3	7	7	23.2	47.346	423	42.724	14.4	23.2	101690000	166040000	1.63281
Q6ZWQ9;Q9D6E6;Q9CXD2;Q3THE2;Q922W7;D3YV37;Q9CQ19;D3Z249	Myosin, light chain 12A, regulatory, non-sarcomeric (Predicted gene, 49909)	Myl12a 2900073G15Rik Gm49909 Myl12b	tr|Q6ZWQ9|Q6ZWQ9_MOUSE Myosin, light chain 12A, regulatory, non-sarcomeric OS=Mus musculus OX=10090 GN=Myl12a PE=1 SV=1;tr|Q9D6E6|Q9D6E6_MOUSE Uncharacterized protein OS=Mus musculus OX=10090 PE=2 SV=1;tr|Q9CXD2|Q9CXD2_MOUSE Uncharacterized protein OS=Mus	8	7	7	57	19.895	172	58.449	57	46.5	563580000	535280000	0.949785
Q7TMB8;A0A0R4J119;F6QD74;Q5SQX6;A0A0U1RQ05;Q810V4;Q6PGK0	Cytoplasmic FMR1-interacting protein 1 (Specifically Rac1-associated protein 1) (Sra-1)	Cyfip1 Kiaa0068 Shyc Sra1	sp|Q7TMB8|CYFP1_MOUSE Cytoplasmic FMR1-interacting protein 1 OS=Mus musculus OX=10090 GN=Cyfip1 PE=1 SV=1;tr|A0A0R4J119|A0A0R4J119_MOUSE Cytoplasmic FMR1-interacting protein OS=Mus musculus OX=10090 GN=Cyfip1 PE=1 SV=1;tr|F6QD74|F6QD74_MOUSE Cytoplasmic FM	7	7	7	6.2	145.24	1253	46.821	6.2	3.5	138860000	59041000	0.425184
Q8BH59;V9GXX9	Calcium-binding mitochondrial carrier protein Aralar1 (Mitochondrial aspartate glutamate carrier 1) (Solute carrier family 25 member 12)	Slc25a12 Aralar1	sp|Q8BH59|CMC1_MOUSE Calcium-binding mitochondrial carrier protein Aralar1 OS=Mus musculus OX=10090 GN=Slc25a12 PE=1 SV=1	2	8	7	17.3	74.569	677	56.876	1.9	17.3	8052100	207370000	25.7535
Q8BMF4;Q99LL2	Dihydrolipoyllysine-residue acetyltransferase component of pyruvate dehydrogenase complex, mitochondrial (EC 2.3.1.12) (Dihydrolipoamide acetyltransferase component of pyruvate dehydrogenase complex) (Pyruvate dehydrogenase complex component E2) (PDC-E2) (PDCE2)	Dlat	sp|Q8BMF4|ODP2_MOUSE Dihydrolipoyllysine-residue acetyltransferase component of pyruvate dehydrogenase complex, mitochondrial OS=Mus musculus OX=10090 GN=Dlat PE=1 SV=2	2	7	7	15.7	67.941	642	53.413	9.7	15.7	131240000	1014800000	7.7324
Q91WP1;Q8K094;Q8BVF6;Q60977	Cd155 (Poliovirus receptor)	Pvr cd155 D7Ertd458e	tr|Q91WP1|Q91WP1_MOUSE Cd155 OS=Mus musculus OX=10090 GN=Pvr PE=2 SV=1;tr|Q8K094|Q8K094_MOUSE Poliovirus receptor OS=Mus musculus OX=10090 GN=Pvr PE=1 SV=1;tr|Q8BVF6|Q8BVF6_MOUSE Uncharacterized protein OS=Mus musculus OX=10090 GN=Pvr PE=2 SV=1;tr|Q60977|Q	4	7	7	20.8	44.654	408	50.635	20.8	16.4	549460000	327080000	0.595275
Q8C3J5;Q6A0A3;Q5SRI3;D6RGU3;Q3TMS1	Dedicator of cytokinesis protein 2 (Protein Hch)	Dock2	sp|Q8C3J5|DOCK2_MOUSE Dedicator of cytokinesis protein 2 OS=Mus musculus OX=10090 GN=Dock2 PE=1 SV=3;tr|Q6A0A3|Q6A0A3_MOUSE MKIAA0209 protein (Fragment) OS=Mus musculus OX=10090 GN=Dock2 PE=2 SV=1;tr|Q5SRI3|Q5SRI3_MOUSE Dedicator of cytokinesis protein 2 O	5	7	7	4.4	211.7	1828	47.804	1.7	4.4	37890000	135720000	3.58195
Q8CFI7	DNA-directed RNA polymerase II subunit RPB2 (EC 2.7.7.6) (DNA-directed RNA polymerase II 140 kDa polypeptide) (DNA-directed RNA polymerase II subunit B) (RNA polymerase II subunit 2) (RNA polymerase II subunit B2)	Polr2b	sp|Q8CFI7|RPB2_MOUSE DNA-directed RNA polymerase II subunit RPB2 OS=Mus musculus OX=10090 GN=Polr2b PE=1 SV=2	1	7	7	7.6	133.91	1174	52.391	6.8	4.9	121010000	48312000	0.39924
Q8K3G7;Q99P72	Reticulon	Rtn4	tr|Q8K3G7|Q8K3G7_MOUSE Reticulon OS=Mus musculus OX=10090 GN=Rtn4 PE=2 SV=1;sp|Q99P72|RTN4_MOUSE Reticulon-4 OS=Mus musculus OX=10090 GN=Rtn4 PE=1 SV=2	2	7	7	42	38.566	357	51.795	7.6	42	45896000	717150000	15.6255
Q8K4Z5;Q3TVM1;Q8BKK2	Splicing factor 3A subunit 1 (SF3a120)	Sf3a1	sp|Q8K4Z5|SF3A1_MOUSE Splicing factor 3A subunit 1 OS=Mus musculus OX=10090 GN=Sf3a1 PE=1 SV=1;tr|Q3TVM1|Q3TVM1_MOUSE Uncharacterized protein OS=Mus musculus OX=10090 GN=Sf3a1 PE=2 SV=1;tr|Q8BKK2|Q8BKK2_MOUSE Uncharacterized protein OS=Mus musculus OX=1009	3	7	7	10.4	88.544	791	42.944	6.3	10.4	116460000	357440000	3.06921
Q922B8;Q91VR5;Q3V1Z7;A0A1Y7VM48	ATP-dependent RNA helicase DDX1 (EC 3.6.4.13) (DEAD box protein 1)	Ddx1	tr|Q922B8|Q922B8_MOUSE ATP-dependent RNA helicase DDX1 OS=Mus musculus OX=10090 GN=Ddx1 PE=2 SV=1;sp|Q91VR5|DDX1_MOUSE ATP-dependent RNA helicase DDX1 OS=Mus musculus OX=10090 GN=Ddx1 PE=1 SV=1;tr|Q3V1Z7|Q3V1Z7_MOUSE ATP-dependent RNA helicase DDX1 OS=Mus	4	7	7	13.9	82.612	740	59.009	13	13.9	206180000	422160000	2.04753
Q91XV3	Brain acid soluble protein 1 (22 kDa neuronal tissue-enriched acidic protein) (Neuronal axonal membrane protein NAP-22)	Basp1 Nap22	sp|Q91XV3|BASP1_MOUSE Brain acid soluble protein 1 OS=Mus musculus OX=10090 GN=Basp1 PE=1 SV=3	1	7	7	57.5	22.086	226	70.664	57.5	57.5	311560000	429210000	1.37762
Q924C1;A2RRJ4	Exportin-5 (Exp5) (Ran-binding protein 21)	Xpo5 Kiaa1291 Ranbp21	sp|Q924C1|XPO5_MOUSE Exportin-5 OS=Mus musculus OX=10090 GN=Xpo5 PE=1 SV=1;tr|A2RRJ4|A2RRJ4_MOUSE Exportin 5 OS=Mus musculus OX=10090 GN=Xpo5 PE=2 SV=1	2	7	7	6.7	136.97	1204	47.79	5.4	6.7	48072000	119370000	2.48315
Q99KE1;Q3TSD4;Q3V2Y4;Q3UZW5;Q8BMF3	NAD-dependent malic enzyme, mitochondrial (NAD-ME) (EC 1.1.1.38) (Malic enzyme 2)	Me2	sp|Q99KE1|MAOM_MOUSE NAD-dependent malic enzyme, mitochondrial OS=Mus musculus OX=10090 GN=Me2 PE=1 SV=1;tr|Q3TSD4|Q3TSD4_MOUSE Malic enzyme OS=Mus musculus OX=10090 GN=Me2 PE=2 SV=1	5	7	7	16.8	65.798	589	71.055	16.8	9.3	160410000	70924000	0.442142
Q99LC5	Electron transfer flavoprotein subunit alpha, mitochondrial (Alpha-ETF)	Etfa	sp|Q99LC5|ETFA_MOUSE Electron transfer flavoprotein subunit alpha, mitochondrial OS=Mus musculus OX=10090 GN=Etfa PE=1 SV=2	1	7	7	32.7	35.009	333	62.616	14.1	32.7	84193000	346070000	4.11044
Q99M31	Heat shock 70 kDa protein 14 (NST-1) (hsr.1)	Hspa14 Hsp70-4	sp|Q99M31|HSP7E_MOUSE Heat shock 70 kDa protein 14 OS=Mus musculus OX=10090 GN=Hspa14 PE=1 SV=2	1	7	7	14.9	54.65	509	54.893	8.8	14.9	44967000	193960000	4.31339
Q99PT1	Rho GDP-dissociation inhibitor 1 (Rho GDI 1) (GDI-1) (Rho-GDI alpha)	Arhgdia C87222 Gdi1	sp|Q99PT1|GDIR1_MOUSE Rho GDP-dissociation inhibitor 1 OS=Mus musculus OX=10090 GN=Arhgdia PE=1 SV=3	1	7	7	33.8	23.407	204	65.933	33.8	28.4	659140000	182630000	0.277073
Q9CQ65	S-methyl-5'-thioadenosine phosphorylase (EC 2.4.2.28) (5'-methylthioadenosine phosphorylase) (MTA phosphorylase) (MTAP) (MTAPase)	Mtap	sp|Q9CQ65|MTAP_MOUSE S-methyl-5-thioadenosine phosphorylase OS=Mus musculus OX=10090 GN=Mtap PE=1 SV=1	1	7	7	34.3	31.062	283	58.618	34.3	24.4	323960000	110830000	0.34211
Q9CZU6;Q9DAM4;Q80X68;Q0QEL9	Citrate synthase, mitochondrial (EC 2.3.3.1) (Citrate (Si)-synthase)	Cs	sp|Q9CZU6|CISY_MOUSE Citrate synthase, mitochondrial OS=Mus musculus OX=10090 GN=Cs PE=1 SV=1	4	7	7	15.5	51.736	464	48.82	12.1	9.5	278560000	100970000	0.362471
Q9D8B3	Charged multivesicular body protein 4b (Chromatin-modifying protein 4b) (CHMP4b)	Chmp4b	sp|Q9D8B3|CHM4B_MOUSE Charged multivesicular body protein 4b OS=Mus musculus OX=10090 GN=Chmp4b PE=1 SV=2	1	7	7	39.3	24.936	224	62.304	39.3	34.4	461250000	476320000	1.03267
Q9DCX2;B1ASE2	ATP synthase subunit d, mitochondrial (ATPase subunit d) (ATP synthase peripheral stalk subunit d)	Atp5pd Atp5h	sp|Q9DCX2|ATP5H_MOUSE ATP synthase subunit d, mitochondrial OS=Mus musculus OX=10090 GN=Atp5pd PE=1 SV=3;tr|B1ASE2|B1ASE2_MOUSE ATP synthase subunit d, mitochondrial (Fragment) OS=Mus musculus OX=10090 GN=Atp5h PE=1 SV=1	2	7	7	53.4	18.749	161	64.141	0	53.4	0	1063900000	#DIV/0!
Q9ES52;Q3UEU0	Phosphatidylinositol 3,4,5-trisphosphate 5-phosphatase 1 (EC 3.1.3.86) (Inositol polyphosphate-5-phosphatase D) (EC 3.1.3.56) (Inositol polyphosphate-5-phosphatase of 145 kDa) (SIP-145) (Phosphatidylinositol-4,5-bisphosphate 5-phosphatase) (EC 3.1.3.36) (SH2 domain-containing inositol 5'-phosphatase 1) (SH2 domain-containing inositol phosphatase 1) (SHIP-1) (p150Ship)	Inpp5d 7a33 Ship Ship1	sp|Q9ES52|SHIP1_MOUSE Phosphatidylinositol 3,4,5-trisphosphate 5-phosphatase 1 OS=Mus musculus OX=10090 GN=Inpp5d PE=1 SV=2	2	7	7	7.2	133.54	1191	47.063	7.2	7.2	79649000	87584000	1.09962
A0A087WQS2;Q9CQC6;A0A087WPF9;A0A087WS48;Q9CVI6	Basic leucine zipper and W2 domain-containing protein 1	Bzw1	tr|A0A087WQS2|A0A087WQS2_MOUSE Basic leucine zipper and W2 domain-containing protein 1 OS=Mus musculus OX=10090 GN=Bzw1 PE=1 SV=1;sp|Q9CQC6|BZW1_MOUSE Basic leucine zipper and W2 domain-containing protein 1 OS=Mus musculus OX=10090 GN=Bzw1 PE=1 SV=1;tr|A0A	5	6	6	16.2	51.209	451	40.078	13.7	16.2	232480000	532700000	2.29138
A0A0A6YX18;Q8BVE3;A0A0A6YWP6;Q3U9S9;A0A0A6YVU0	V-type proton ATPase subunit H	Atp6v1h	tr|A0A0A6YX18|A0A0A6YX18_MOUSE V-type proton ATPase subunit H OS=Mus musculus OX=10090 GN=Atp6v1h PE=1 SV=1;sp|Q8BVE3|VATH_MOUSE V-type proton ATPase subunit H OS=Mus musculus OX=10090 GN=Atp6v1h PE=1 SV=1;tr|A0A0A6YWP6|A0A0A6YWP6_MOUSE V-type proton ATPas	5	6	6	21.3	54.108	465	51.267	21.3	21.3	115470000	880250000	7.62319
A0A0G2JG00;Q0P6B2;Q3TUE1;A0A0G2JGW9;A0A0G2JFY5;Q3UUU2;Q91WJ8;Q3TIS5;A0A0G2JFK2	Far upstream element-binding protein 1	Fubp1	tr|A0A0G2JG00|A0A0G2JG00_MOUSE Far upstream element-binding protein 1 OS=Mus musculus OX=10090 GN=Fubp1 PE=1 SV=1;tr|Q0P6B2|Q0P6B2_MOUSE Far upstream element (FUSE) binding protein 1 OS=Mus musculus OX=10090 GN=Fubp1 PE=2 SV=1;tr|Q3TUE1|Q3TUE1_MOUSE Far up	9	6	6	15.1	54.844	523	47.544	15.1	11.7	188910000	237080000	1.25499
A0A0R4IZY0;Q8C1A5;Q99LK5	Thimet oligopeptidase	Thop1	tr|A0A0R4IZY0|A0A0R4IZY0_MOUSE Thimet oligopeptidase OS=Mus musculus OX=10090 GN=Thop1 PE=1 SV=1;sp|Q8C1A5|THOP1_MOUSE Thimet oligopeptidase OS=Mus musculus OX=10090 GN=Thop1 PE=1 SV=1	3	6	6	11.2	78.026	687	41.423	11.2	8.4	159120000	69638000	0.437645
G3UYZ1;A0A0R4J117;Q8R366;A0A0A6YVX9;D3Z4Q8;A0A0A6YWK7	Immunoglobulin superfamily member 8	Igsf8	tr|G3UYZ1|G3UYZ1_MOUSE Immunoglobulin superfamily member 8 OS=Mus musculus OX=10090 GN=Igsf8 PE=1 SV=1;tr|A0A0R4J117|A0A0R4J117_MOUSE Immunoglobulin superfamily member 8 OS=Mus musculus OX=10090 GN=Igsf8 PE=1 SV=1;sp|Q8R366|IGSF8_MOUSE Immunoglobulin super	6	6	6	15.7	58.131	548	55.969	15.7	13.3	489480000	120680000	0.246547
A0A0R4J170;Q3TKT4;Q3URH5;G3UX35;Q8CGJ5;Q8R569;Q8BQ54;Q7TQL1;Q6P8K2;Q8R0K1;Q3UI73	Transcription activator BRG1	Smarca4	tr|A0A0R4J170|A0A0R4J170_MOUSE Transcription activator BRG1 OS=Mus musculus OX=10090 GN=Smarca4 PE=1 SV=1;sp|Q3TKT4|SMCA4_MOUSE Transcription activator BRG1 OS=Mus musculus OX=10090 GN=Smarca4 PE=1 SV=1;tr|Q3URH5|Q3URH5_MOUSE Uncharacterized protein (Fragm	11	6	6	4.8	181.85	1617	60.325	2.3	4.8	45165000	125470000	2.77804
A0A1L1STE6;Q9D6R2	Isocitrate dehydrogenase [NAD] subunit, mitochondrial	Idh3a	tr|A0A1L1STE6|A0A1L1STE6_MOUSE Isocitrate dehydrogenase [NAD] subunit, mitochondrial OS=Mus musculus OX=10090 GN=Idh3a PE=1 SV=1;sp|Q9D6R2|IDH3A_MOUSE Isocitrate dehydrogenase [NAD] subunit alpha, mitochondrial OS=Mus musculus OX=10090 GN=Idh3a PE=1 SV=1	2	6	6	19	41.52	384	42.109	16.4	19	325700000	382090000	1.17313
Q8BMP9;Q5U412;Q3UA28;Q3U9H4;Q3U573;Q3TUR1;Q3TG02;Q3U547;A0A1S6GWK0;P46978;Q3TVN9;Q8BWT4;D3YZN5	Dolichyl-diphosphooligosaccharide--protein glycotransferase (EC 2.4.99.18)	Stt3a Itm1	tr|Q8BMP9|Q8BMP9_MOUSE Dolichyl-diphosphooligosaccharide--protein glycotransferase OS=Mus musculus OX=10090 GN=Stt3a PE=2 SV=1;tr|Q5U412|Q5U412_MOUSE Dolichyl-diphosphooligosaccharide--protein glycotransferase OS=Mus musculus OX=10090 GN=Stt3a PE=2 SV=1;tr	13	6	6	7.5	80.53	705	39.067	0	7.5	0	506220000	#DIV/0!
A2AB60;A0A1W2P6X3;Q9JL26;Q3TY82	Formin-like protein 1	Fmnl1	tr|A2AB60|A2AB60_MOUSE Formin-like protein 1 OS=Mus musculus OX=10090 GN=Fmnl1 PE=1 SV=1;tr|A0A1W2P6X3|A0A1W2P6X3_MOUSE Formin-like protein 1 OS=Mus musculus OX=10090 GN=Fmnl1 PE=1 SV=1;sp|Q9JL26|FMNL1_MOUSE Formin-like protein 1 OS=Mus musculus OX=10090 G	4	7	6	8.6	121.54	1090	62.951	7.6	6.9	70436000	178560000	2.53507
Q3UN35;A0A1Z4EAV4;Q09200;A0A1W2P6F0;Q8VDF0	Beta-1,4 N-acetylgalactosaminyltransferase	B4galnt1 Galgt1	tr|Q3UN35|Q3UN35_MOUSE Beta-1,4 N-acetylgalactosaminyltransferase OS=Mus musculus OX=10090 GN=B4galnt1 PE=1 SV=1;tr|A0A1Z4EAV4|A0A1Z4EAV4_MOUSE Beta-1,4-N-acetyl-galactosaminyl transferase 1 OS=Mus musculus OX=10090 GN=B4galnt1 PE=2 SV=1;sp|Q09200|B4GN1_MO	5	6	6	14.6	59.211	533	41.653	0	14.6	0	161860000	#DIV/0!
E9Q390;B9EK95;A0A286YDF5;Q69ZN7;A0A286YCZ3	Myoferlin	Myof	tr|E9Q390|E9Q390_MOUSE Myoferlin OS=Mus musculus OX=10090 GN=Myof PE=1 SV=2;tr|B9EK95|B9EK95_MOUSE Myof protein OS=Mus musculus OX=10090 GN=Myof PE=2 SV=1;tr|A0A286YDF5|A0A286YDF5_MOUSE Myoferlin OS=Mus musculus OX=10090 GN=Myof PE=1 SV=1;sp|Q69ZN7|MYOF_MO	5	6	6	3.5	233.32	2048	53.503	1.8	3.5	60335000	173250000	2.87147
A0A494BB49;Q9ER20;Q91X69;Q3UP78;P13379;Q8C9H0;A0A494B9V0	T-cell surface glycoprotein CD5	Cd5	tr|A0A494BB49|A0A494BB49_MOUSE T-cell surface glycoprotein CD5 OS=Mus musculus OX=10090 GN=Cd5 PE=1 SV=1;tr|Q9ER20|Q9ER20_MOUSE CD5.1 OS=Mus musculus OX=10090 GN=Cd5 PE=2 SV=1;tr|Q91X69|Q91X69_MOUSE CD5 antigen OS=Mus musculus OX=10090 GN=Cd5 PE=2 SV=1;tr|	7	6	6	20	49.064	449	48.659	15.6	20	438580000	346830000	0.790802
A0A494BBG8;Q3TL27;Q3UKF5;S4R1I3;Q3UE92;Q6P1B1;Q8VDK8;Q8BKH1;Q8BV43;S4R228	Xaa-Pro aminopeptidase 1	Xpnpep1	tr|A0A494BBG8|A0A494BBG8_MOUSE Xaa-Pro aminopeptidase 1 OS=Mus musculus OX=10090 GN=Xpnpep1 PE=1 SV=1;tr|Q3TL27|Q3TL27_MOUSE Uncharacterized protein OS=Mus musculus OX=10090 GN=Xpnpep1 PE=2 SV=1;tr|Q3UKF5|Q3UKF5_MOUSE X-prolyl aminopeptidase OS=Mus musculu	10	6	6	14.5	65.186	587	39.205	14.5	14.5	206910000	87650000	0.423614
A0A5F8MPB9;Q3TH46;Q3U111;P26043;Q3UJJ8;Q7TSG6;Q8C2N4;Q05CE6;Q3TS74	Radixin	Rdx	tr|A0A5F8MPB9|A0A5F8MPB9_MOUSE Radixin OS=Mus musculus OX=10090 GN=Rdx PE=1 SV=1;tr|Q3TH46|Q3TH46_MOUSE FERM domain-containing protein (Fragment) OS=Mus musculus OX=10090 GN=Rdx PE=2 SV=1;tr|Q3U111|Q3U111_MOUSE FERM domain-containing protein (Fragment) OS=	9	10	6	18.9	71.027	604	33.552	17.5	15.7	148990000	66962000	0.44944
A0A6I8MWZ0;Q6P9Q6;B2RQ18;Q80YW9;Q80YW6;Q80YW7	Peptidylprolyl isomerase (EC 5.2.1.8) (Fragment)	Fkbp15	tr|A0A6I8MWZ0|A0A6I8MWZ0_MOUSE Peptidylprolyl isomerase (Fragment) OS=Mus musculus OX=10090 GN=Fkbp15 PE=1 SV=1;sp|Q6P9Q6|FKB15_MOUSE FK506-binding protein 15 OS=Mus musculus OX=10090 GN=Fkbp15 PE=1 SV=2;tr|B2RQ18|B2RQ18_MOUSE Peptidylprolyl isomerase OS=M	6	6	6	10.7	114.24	1044	41.789	8.2	10.7	47367000	194050000	4.09673
A0JLV3;B2RVD5;B2RTK3;Q8CBB6;Q921L4;Q8CGP2;Q8CGP1;Q6ZWY9;Q64525;Q64478;Q64475;P10854;P10853;Q8VEE3;A0JNS9;Q9D2U9;Q8CGP0;Q64524;P70696;Q8C622	Histone H2B (Fragment)	Hist1h2bj	tr|A0JLV3|A0JLV3_MOUSE Histone H2B (Fragment) OS=Mus musculus OX=10090 GN=Hist1h2bj PE=2 SV=1;tr|B2RVD5|B2RVD5_MOUSE Histone H2B OS=Mus musculus OX=10090 GN=H2bc12 PE=2 SV=1;tr|B2RTK3|B2RTK3_MOUSE Histone H2B OS=Mus musculus OX=10090 GN=H2bc14 PE=1 SV=1;tr	20	6	6	42.3	13.579	123	45.203	36.6	42.3	1233400000	19059000000	15.4524
Z4YJW0;A1L2Z3;Q8C7X2;A0A1Y7VP81	ER membrane protein complex subunit 1	Emc1	tr|Z4YJW0|Z4YJW0_MOUSE ER membrane protein complex subunit 1 OS=Mus musculus OX=10090 GN=Emc1 PE=1 SV=1;tr|A1L2Z3|A1L2Z3_MOUSE ER membrane protein complex subunit 1 OS=Mus musculus OX=10090 GN=Emc1 PE=2 SV=1;sp|Q8C7X2|EMC1_MOUSE ER membrane protein complex	4	6	6	7.8	111.56	997	57.944	0	7.8	0	193950000	#DIV/0!
A2AE89;P10649;F6WHQ7;D3YVP6;D3YX76;E9QAC8;D3YVP5;Q6PJ91;Q80W21;P15626;D3YZ29;A2AE91;Q8R5I6;P19639;Q7M0F3;D3YVP8;Q7M0F4;D3YVP9;E9PV63;E9PVM7;Q9D5J8;G5E8M7;O35660;P48774	Glutathione transferase (EC 2.5.1.18)	Gstm1	tr|A2AE89|A2AE89_MOUSE Glutathione transferase OS=Mus musculus OX=10090 GN=Gstm1 PE=1 SV=2;sp|P10649|GSTM1_MOUSE Glutathione S-transferase Mu 1 OS=Mus musculus OX=10090 GN=Gstm1 PE=1 SV=2;tr|F6WHQ7|F6WHQ7_MOUSE Glutathione S-transferase Mu 1 (Fragment) OS=	24	6	6	27.5	28.556	244	42.857	27.5	27.5	303740000	240350000	0.791302
Q4JG03;A2AFQ0;Q7TMY8;Q8BKX3;F6XP90;Q3TL29;Q8C0G8;F6UYC1	HECT-type E3 ubiquitin transferase (EC 2.3.2.26)	Huwe1 Mule	tr|Q4JG03|Q4JG03_MOUSE HECT-type E3 ubiquitin transferase OS=Mus musculus OX=10090 GN=Huwe1 PE=2 SV=1;tr|A2AFQ0|A2AFQ0_MOUSE HECT-type E3 ubiquitin transferase OS=Mus musculus OX=10090 GN=Huwe1 PE=1 SV=1;sp|Q7TMY8|HUWE1_MOUSE E3 ubiquitin-protein ligase HU	8	12	6	4	482.74	4378	80.754	4	3.5	190510000	88921000	0.466752
A2AKH4;Q9D3L3;O09044;B0R030;B0R029;E9Q8A1	Synaptosomal-associated protein	Snap23 SNAP-23	tr|A2AKH4|A2AKH4_MOUSE Synaptosomal-associated protein OS=Mus musculus OX=10090 GN=Snap23 PE=1 SV=1;tr|Q9D3L3|Q9D3L3_MOUSE Synaptosomal-associated protein OS=Mus musculus OX=10090 GN=Snap23 PE=1 SV=1;sp|O09044|SNP23_MOUSE Synaptosomal-associated protein 23	6	7	6	48.1	23.261	210	80.641	40	44.8	357110000	157360000	0.440649
A2AL50;Q8C0I1;H3BKN2;A2AL49;Q8BKC4;Q3TNW8	Alkylglycerone-phosphate synthase (Alkyl-DHAP synthase) (EC 2.5.1.26)	Agps	tr|A2AL50|A2AL50_MOUSE Alkylglycerone-phosphate synthase OS=Mus musculus OX=10090 GN=Agps PE=1 SV=1;sp|Q8C0I1|ADAS_MOUSE Alkyldihydroxyacetonephosphate synthase, peroxisomal OS=Mus musculus OX=10090 GN=Agps PE=1 SV=1;tr|H3BKN2|H3BKN2_MOUSE Alkylglycerone-p	6	6	6	14.3	74.342	671	46.954	1.8	14.3	12458000	200510000	16.0949
Q3U3F6;A2AU62;Q64012;A2AU61;Q3TGD3;A2AU60	RRM domain-containing protein	Raly	tr|Q3U3F6|Q3U3F6_MOUSE RRM domain-containing protein OS=Mus musculus OX=10090 GN=Raly PE=2 SV=1;tr|A2AU62|A2AU62_MOUSE RNA-binding protein Raly (Fragment) OS=Mus musculus OX=10090 GN=Raly PE=1 SV=1;sp|Q64012|RALY_MOUSE RNA-binding protein Raly OS=Mus muscu	6	6	6	22.6	31.198	296	49.72	2.7	22.6	1961500	432910000	220.704
B1ARA3;Q4FZH2;P61255;Q3U7N1;B1ARA5	60S ribosomal protein L26 (Fragment)	Rpl26	tr|B1ARA3|B1ARA3_MOUSE 60S ribosomal protein L26 (Fragment) OS=Mus musculus OX=10090 GN=Rpl26 PE=1 SV=1;tr|Q4FZH2|Q4FZH2_MOUSE Ribosomal protein L26 OS=Mus musculus OX=10090 GN=Rpl26 PE=1 SV=1;sp|P61255|RL26_MOUSE 60S ribosomal protein L26 OS=Mus musculus	5	6	6	40.8	12.217	103	47.46	15.5	40.8	106340000	1121000000	10.5417
B1AU25;Q9Z0X1;Q2QKE3	Apoptosis-inducing factor 1, mitochondrial	Aifm1	tr|B1AU25|B1AU25_MOUSE Apoptosis-inducing factor 1, mitochondrial OS=Mus musculus OX=10090 GN=Aifm1 PE=1 SV=1;sp|Q9Z0X1|AIFM1_MOUSE Apoptosis-inducing factor 1, mitochondrial OS=Mus musculus OX=10090 GN=Aifm1 PE=1 SV=1;tr|Q2QKE3|Q2QKE3_MOUSE Apoptosis-indu	3	6	6	14	66.113	608	53.532	0	14	0	156990000	#DIV/0!
Q80TG5;E9QNG1;B2RR82;Q9Z0R6;A0A1W2P775;Q3V3Y8;Q3TQ85	MKIAA1256 protein (Fragment)	mKIAA1256	tr|Q80TG5|Q80TG5_MOUSE MKIAA1256 protein (Fragment) OS=Mus musculus OX=10090 GN=mKIAA1256 PE=4 SV=3;tr|E9QNG1|E9QNG1_MOUSE Intersectin-2 OS=Mus musculus OX=10090 GN=Itsn2 PE=1 SV=1;tr|B2RR82|B2RR82_MOUSE Intersectin-2 OS=Mus musculus OX=10090 GN=Itsn2 PE=1	7	6	6	4.7	175.54	1539	39.648	4.7	2.8	70326000	53980000	0.767568
B9EJR8;Q7TPU1;B2RY24	Dynein assembly factor 5, axonemal (HEAT repeat-containing protein 2)	Dnaaf5 Heatr2	sp|B9EJR8|DAAF5_MOUSE Dynein assembly factor 5, axonemal OS=Mus musculus OX=10090 GN=Dnaaf5 PE=1 SV=1	3	6	6	8.1	93.85	853	37.563	6	6.8	47836000	77899000	1.62846
E9Q4G8;E9Q3Q6;Q54AJ5;Q61490;F6QH25	Activated leukocyte cell adhesion molecule (CD166 antigen)	Alcam	tr|E9Q4G8|E9Q4G8_MOUSE Activated leukocyte cell adhesion molecule OS=Mus musculus OX=10090 GN=Alcam PE=1 SV=1;tr|E9Q3Q6|E9Q3Q6_MOUSE Activated leukocyte cell adhesion molecule OS=Mus musculus OX=10090 GN=Alcam PE=1 SV=1;tr|Q54AJ5|Q54AJ5_MOUSE Activated leu	5	6	6	16.8	61.9	555	37.526	16.8	16.8	224440000	190210000	0.847487
G5E8R3;Q3UFS6;Q3TCQ3;Q3T9S7;E9QPD7;Q05920;Q62043;Q8BP54	Pyruvate carboxylase (EC 6.4.1.1)	Pcx	tr|G5E8R3|G5E8R3_MOUSE Pyruvate carboxylase OS=Mus musculus OX=10090 GN=Pcx PE=1 SV=1;tr|Q3UFS6|Q3UFS6_MOUSE Pyruvate carboxylase OS=Mus musculus OX=10090 GN=Pcx PE=2 SV=1;tr|Q3TCQ3|Q3TCQ3_MOUSE Pyruvate carboxylase OS=Mus musculus OX=10090 GN=Pcx PE=2 SV=	8	6	6	5.9	129.7	1178	42.674	1	5.9	0	274190000	#DIV/0!
F6QA74;Q544Z7;P28352;D3Z124;D3Z6R9	DNA-(apurinic or apyrimidinic site) endonuclease (EC 3.1.-.-) (Fragment)	Apex1	tr|F6QA74|F6QA74_MOUSE DNA-(apurinic or apyrimidinic site) endonuclease (Fragment) OS=Mus musculus OX=10090 GN=Apex1 PE=1 SV=1;tr|Q544Z7|Q544Z7_MOUSE DNA-(apurinic or apyrimidinic site) endonuclease OS=Mus musculus OX=10090 GN=Apex1 PE=1 SV=1;sp|P28352|APE	5	6	6	32.9	32.318	289	45.636	32.9	29.1	142950000	72989000	0.510591
F6RPJ9;Q8CGB9;Q9JHR7	Insulin-degrading enzyme (Fragment)	Ide	tr|F6RPJ9|F6RPJ9_MOUSE Insulin-degrading enzyme (Fragment) OS=Mus musculus OX=10090 GN=Ide PE=1 SV=1;tr|Q8CGB9|Q8CGB9_MOUSE Insulin degrading enzyme OS=Mus musculus OX=10090 GN=Ide PE=2 SV=1;sp|Q9JHR7|IDE_MOUSE Insulin-degrading enzyme OS=Mus musculus OX=1	3	6	6	7.9	114.15	987	43.239	6.7	5.7	100100000	37204000	0.371668
F7DEU6;P50096;E0CYE2;E0CXK0;F6XXH9	Inosine-5'-monophosphate dehydrogenase (IMP dehydrogenase) (IMPD) (IMPDH) (EC 1.1.1.205)	Impdh1 IMPDH	tr|F7DEU6|F7DEU6_MOUSE Inosine-5-monophosphate dehydrogenase OS=Mus musculus OX=10090 GN=Impdh1 PE=1 SV=2;sp|P50096|IMDH1_MOUSE Inosine-5-monophosphate dehydrogenase 1 OS=Mus musculus OX=10090 GN=Impdh1 PE=1 SV=2;tr|E0CYE2|E0CYE2_MOUSE Inosine-5-monopho	5	7	6	19.5	57.688	538	42.637	19.5	19.5	91264000	188020000	2.06018
Q8K3D9;G3X8Y8;Q9QUN7;Q811T5	Toll-like receptor 2	Tlr2	tr|Q8K3D9|Q8K3D9_MOUSE Toll-like receptor 2 OS=Mus musculus OX=10090 GN=Tlr2 PE=2 SV=1;tr|G3X8Y8|G3X8Y8_MOUSE Toll-like receptor 2 OS=Mus musculus OX=10090 GN=Tlr2 PE=1 SV=1;sp|Q9QUN7|TLR2_MOUSE Toll-like receptor 2 OS=Mus musculus OX=10090 GN=Tlr2 PE=1 SV	4	6	6	9.6	89.458	784	49.033	9.6	4.7	196330000	98400000	0.501197
H3BJP2;H3BLJ9;H3BJL6;H3BKH6;Q9R0P3;H3BK43;H3BJC6;H3BL99	S-formylglutathione hydrolase (EC 3.1.2.12) (Fragment)	Esd	tr|H3BJP2|H3BJP2_MOUSE S-formylglutathione hydrolase (Fragment) OS=Mus musculus OX=10090 GN=Esd PE=1 SV=1;tr|H3BLJ9|H3BLJ9_MOUSE S-formylglutathione hydrolase OS=Mus musculus OX=10090 GN=Esd PE=1 SV=1;tr|H3BJL6|H3BJL6_MOUSE S-formylglutathione hydrolase OS	8	6	6	36	27.131	247	61.662	36	36	1340500000	294860000	0.219963
H9KV01;H9KV15;H9KV00;Q9QX47;Q8C9T5;H9KV02;Q8BS91;F7CU80;Q80TM4	Protein SON	Son	tr|H9KV01|H9KV01_MOUSE Protein SON OS=Mus musculus OX=10090 GN=Son PE=1 SV=1;tr|H9KV15|H9KV15_MOUSE Protein SON OS=Mus musculus OX=10090 GN=Son PE=1 SV=1;tr|H9KV00|H9KV00_MOUSE Protein SON OS=Mus musculus OX=10090 GN=Son PE=1 SV=1;sp|Q9QX47|SON_MOUSE Prote	9	6	6	3.5	252.18	2321	37.356	0.3	3.5	46825000	72653000	1.55159
O08547;E9Q6R3;Q3UZ06;A0A0G2JF08	Vesicle-trafficking protein SEC22b (ER-Golgi SNARE of 24 kDa) (ERS-24) (ERS24) (SEC22 vesicle-trafficking protein homolog B) (SEC22 vesicle-trafficking protein-like 1) (mSec22b)	Sec22b Sec22l1	sp|O08547|SC22B_MOUSE Vesicle-trafficking protein SEC22b OS=Mus musculus OX=10090 GN=Sec22b PE=1 SV=3;tr|E9Q6R3|E9Q6R3_MOUSE Vesicle-trafficking protein SEC22b OS=Mus musculus OX=10090 GN=Sec22b PE=1 SV=1;tr|Q3UZ06|Q3UZ06_MOUSE Uncharacterized protein OS=M	4	6	6	34.4	24.74	215	66.897	34.4	23.3	198490000	367470000	1.85133
Q542P8;O35130;A0A0N4SUL6	Uncharacterized protein	Emg1 Grcc2f	tr|Q542P8|Q542P8_MOUSE Uncharacterized protein OS=Mus musculus OX=10090 GN=Emg1 PE=1 SV=1;sp|O35130|NEP1_MOUSE Ribosomal RNA small subunit methyltransferase NEP1 OS=Mus musculus OX=10090 GN=Emg1 PE=1 SV=1	3	6	6	30.7	26.974	244	42.814	30.7	20.9	231900000	62372000	0.268961
O35593;Q9CSU2;Q3UD26	26S proteasome non-ATPase regulatory subunit 14 (EC 3.4.19.-) (26S proteasome regulatory subunit RPN11) (MAD1)	Psmd14 Pad1	sp|O35593|PSDE_MOUSE 26S proteasome non-ATPase regulatory subunit 14 OS=Mus musculus OX=10090 GN=Psmd14 PE=1 SV=2;tr|Q9CSU2|Q9CSU2_MOUSE 26S proteasome regulatory subunit RPN11 (Fragment) OS=Mus musculus OX=10090 GN=Psmd14 PE=2 SV=1;tr|Q3UD26|Q3UD26_MOUSE	3	6	6	36.1	34.577	310	46.613	36.1	36.1	713620000	186690000	0.26161
O35598;E9PYF2;D3Z1E6;Q6NZC0	Disintegrin and metalloproteinase domain-containing protein 10 (ADAM 10) (EC 3.4.24.81) (Kuzbanian protein homolog) (Mammalian disintegrin-metalloprotease) (CD antigen CD156c)	Adam10 Kuz Madm	sp|O35598|ADA10_MOUSE Disintegrin and metalloproteinase domain-containing protein 10 OS=Mus musculus OX=10090 GN=Adam10 PE=1 SV=2;tr|E9PYF2|E9PYF2_MOUSE Disintegrin and metalloproteinase domain-containing protein 10 OS=Mus musculus OX=10090 GN=Adam10 PE=1	4	6	6	10.8	83.967	749	46.391	8.8	8.1	145740000	41931000	0.287711
Q811L7;Q8C2Q7;O35737;P70333;Q3UR26;Q3TNG9	Heterogeneous nuclear ribonucleoprotein H1	Hnrnph1 Hnrph1	tr|Q811L7|Q811L7_MOUSE Heterogeneous nuclear ribonucleoprotein H1 OS=Mus musculus OX=10090 GN=Hnrnph1 PE=1 SV=2;tr|Q8C2Q7|Q8C2Q7_MOUSE Heterogeneous nuclear ribonucleoprotein H OS=Mus musculus OX=10090 GN=Hnrnph1 PE=1 SV=1;sp|O35737|HNRH1_MOUSE Heterogeneo	6	8	6	25.4	49.199	449	61.56	21.6	25.4	187250000	781930000	4.17586
Q8R3X4;O35857;A2VCP9	Timm44 protein (Fragment)	Timm44	tr|Q8R3X4|Q8R3X4_MOUSE Timm44 protein (Fragment) OS=Mus musculus OX=10090 GN=Timm44 PE=2 SV=1;sp|O35857|TIM44_MOUSE Mitochondrial import inner membrane translocase subunit TIM44 OS=Mus musculus OX=10090 GN=Timm44 PE=1 SV=2	3	6	6	16.2	50.888	450	41.016	2.7	16.2	3336200	134940000	40.4472
O54984;Q8VEI6;Q8C1Q1;A0A1B0GRE1	ATPase GET3 (EC 3.6.-.-) (Arsenical pump-driving ATPase) (Arsenite-stimulated ATPase) (Guided entry of tail-anchored proteins factor 3, ATPase)	Get3 Arsa Asna1	sp|O54984|GET3_MOUSE ATPase GET3 OS=Mus musculus OX=10090 GN=Get3 PE=1 SV=2;tr|Q8VEI6|Q8VEI6_MOUSE Asna1 protein OS=Mus musculus OX=10090 GN=Get3 PE=2 SV=1;tr|Q8C1Q1|Q8C1Q1_MOUSE ArsA_ATPase domain-containing protein OS=Mus musculus OX=10090 GN=Get3 PE=2 S	4	6	6	23.9	38.822	348	43.373	23.9	17.8	228980000	203780000	0.889947
O70251;A0A087WS46;G3UX43;G3UZ47	Elongation factor 1-beta (EF-1-beta)	Eef1b Eef1b2	sp|O70251|EF1B_MOUSE Elongation factor 1-beta OS=Mus musculus OX=10090 GN=Eef1b PE=1 SV=5;tr|A0A087WS46|A0A087WS46_MOUSE Eukaryotic translation elongation factor 1 beta 2 OS=Mus musculus OX=10090 GN=Eef1b2 PE=1 SV=1	4	6	6	37.8	24.693	225	43.986	37.8	32	283830000	120230000	0.423599
Q0VGQ1;O70503;Q9CSR6;Q8BPF1	Hydroxysteroid (17-beta) dehydrogenase 12	Hsd17b12	tr|Q0VGQ1|Q0VGQ1_MOUSE Hydroxysteroid (17-beta) dehydrogenase 12 OS=Mus musculus OX=10090 GN=Hsd17b12 PE=2 SV=1;sp|O70503|DHB12_MOUSE Very-long-chain 3-oxoacyl-CoA reductase OS=Mus musculus OX=10090 GN=Hsd17b12 PE=1 SV=1	4	6	6	22.1	34.741	312	42.662	0	22.1	0	754140000	#DIV/0!
P05201;F7ALS6	Aspartate aminotransferase, cytoplasmic (cAspAT) (EC 2.6.1.1) (EC 2.6.1.3) (Cysteine aminotransferase, cytoplasmic) (Cysteine transaminase, cytoplasmic) (cCAT) (Glutamate oxaloacetate transaminase 1) (Transaminase A)	Got1	sp|P05201|AATC_MOUSE Aspartate aminotransferase, cytoplasmic OS=Mus musculus OX=10090 GN=Got1 PE=1 SV=3;tr|F7ALS6|F7ALS6_MOUSE Aspartate transaminase (Fragment) OS=Mus musculus OX=10090 GN=Got1 PE=1 SV=1	2	6	6	16.7	46.247	413	45.621	16.7	14.8	311960000	125030000	0.400789
P08030;A0A1D5RLR6;Q61320	Adenine phosphoribosyltransferase (APRT) (EC 2.4.2.7)	Aprt	sp|P08030|APT_MOUSE Adenine phosphoribosyltransferase OS=Mus musculus OX=10090 GN=Aprt PE=1 SV=2	3	6	6	42.2	19.724	180	60.984	42.2	35	1391600000	261010000	0.187561
Q3V471;Q8C253;P16110;Q61357	Galectin (Fragment)	Lgals3	tr|Q3V471|Q3V471_MOUSE Galectin (Fragment) OS=Mus musculus OX=10090 GN=Lgals3 PE=2 SV=1;tr|Q8C253|Q8C253_MOUSE Galectin OS=Mus musculus OX=10090 GN=Lgals3 PE=1 SV=1;sp|P16110|LEG3_MOUSE Galectin-3 OS=Mus musculus OX=10090 GN=Lgals3 PE=1 SV=3;tr|Q61357|Q613	4	6	6	35.5	19.937	186	42.639	35.5	29.6	1008600000	523240000	0.518779
Q3UJ34;Q3UEJ7;P16460	Argininosuccinate synthase (EC 6.3.4.5) (Citrulline--aspartate ligase)	Ass1	tr|Q3UJ34|Q3UJ34_MOUSE Argininosuccinate synthase OS=Mus musculus OX=10090 GN=Ass1 PE=1 SV=1;tr|Q3UEJ7|Q3UEJ7_MOUSE Argininosuccinate synthase OS=Mus musculus OX=10090 GN=Ass1 PE=2 SV=1;sp|P16460|ASSY_MOUSE Argininosuccinate synthase OS=Mus musculus OX=100	3	6	6	13.6	46.584	412	35.321	3.6	13.6	25376000	426030000	16.7887
Q91ZH2;Q542J9;P17918;Q9CZD6	Proliferating cell nuclear antigen	Pcna	tr|Q91ZH2|Q91ZH2_MOUSE Proliferating cell nuclear antigen OS=Mus musculus OX=10090 GN=Pcna PE=2 SV=1;tr|Q542J9|Q542J9_MOUSE Proliferating cell nuclear antigen OS=Mus musculus OX=10090 GN=Pcna PE=1 SV=1;sp|P17918|PCNA_MOUSE Proliferating cell nuclear antige	4	6	6	33.3	28.845	261	62.187	33.3	28.4	844870000	203780000	0.241197
Q8CBB7;Q3UKX8;P22892;Q8CC03;Q8BSZ7	AP-1 complex subunit gamma	Ap1g1	tr|Q8CBB7|Q8CBB7_MOUSE AP-1 complex subunit gamma OS=Mus musculus OX=10090 GN=Ap1g1 PE=1 SV=1;tr|Q3UKX8|Q3UKX8_MOUSE AP-1 complex subunit gamma OS=Mus musculus OX=10090 GN=Ap1g1 PE=2 SV=1;sp|P22892|AP1G1_MOUSE AP-1 complex subunit gamma-1 OS=Mus musculus O	5	6	6	9.6	91.721	825	39.739	8.5	5.2	86932000	61821000	0.711142
Q3U9E2;Q3U8U1;Q3U670;Q3U4K7;Q3TXC4;P27870;Q8VDU4;E9PXI0;Q3UAH3;Q3UAG9;Q3UAV5;Q3TAF7	Vav 1 oncogene	Vav1 Vav	tr|Q3U9E2|Q3U9E2_MOUSE Vav 1 oncogene OS=Mus musculus OX=10090 GN=Vav1 PE=1 SV=1;tr|Q3U8U1|Q3U8U1_MOUSE Uncharacterized protein OS=Mus musculus OX=10090 GN=Vav1 PE=2 SV=1;tr|Q3U670|Q3U670_MOUSE Uncharacterized protein OS=Mus musculus OX=10090 GN=Vav1 PE=2	12	6	6	8.3	98.136	845	42.05	2.2	8.3	36592000	319780000	8.73907
P30416;F6S2D5;F7CAT1	Peptidyl-prolyl cis-trans isomerase FKBP4 (PPIase FKBP4) (EC 5.2.1.8) (52 kDa FK506-binding protein) (52 kDa FKBP) (FKBP-52) (59 kDa immunophilin) (p59) (FK506-binding protein 4) (FKBP-4) (FKBP59) (HSP-binding immunophilin) (HBI) (Immunophilin FKBP52) (Rotamase) [Cleaved into: Peptidyl-prolyl cis-trans isomerase FKBP4, N-terminally processed]	Fkbp4 Fkpb52	sp|P30416|FKBP4_MOUSE Peptidyl-prolyl cis-trans isomerase FKBP4 OS=Mus musculus OX=10090 GN=Fkbp4 PE=1 SV=5	3	6	6	18.3	51.572	458	44.048	18.3	15.5	250970000	97182000	0.387226
Q0PD38;P35293;A0A3Q4EI12;A0A452J8C1;Q8CEH2;A0A3Q4EIF7	Ras-related protein Rab-18	Rab18	tr|Q0PD38|Q0PD38_MOUSE Ras-related protein Rab-18 OS=Mus musculus OX=10090 GN=Rab18 PE=1 SV=1;sp|P35293|RAB18_MOUSE Ras-related protein Rab-18 OS=Mus musculus OX=10090 GN=Rab18 PE=1 SV=2;tr|A0A3Q4EI12|A0A3Q4EI12_MOUSE Ras-related protein Rab-18 OS=Mus musc	6	6	6	38.3	23.035	206	41.175	18	38.3	64026000	184820000	2.88664
Q5BLK0;Q3TIQ2;P35979;Q8C2K0;Q6DI58	60S ribosomal protein L12	Rpl12	tr|Q5BLK0|Q5BLK0_MOUSE 60S ribosomal protein L12 OS=Mus musculus OX=10090 GN=Rpl12 PE=1 SV=1;tr|Q3TIQ2|Q3TIQ2_MOUSE 60S ribosomal protein L12 OS=Mus musculus OX=10090 GN=Rpl12 PE=2 SV=1;sp|P35979|RL12_MOUSE 60S ribosomal protein L12 OS=Mus musculus OX=1009	5	6	6	54.5	17.804	165	78.734	54.5	54.5	1143800000	3836200000	3.35391
Q3UHW2;Q3TT11;P51660	Uncharacterized protein	Hsd17b4	tr|Q3UHW2|Q3UHW2_MOUSE Uncharacterized protein OS=Mus musculus OX=10090 GN=Hsd17b4 PE=2 SV=1;tr|Q3TT11|Q3TT11_MOUSE Uncharacterized protein OS=Mus musculus OX=10090 GN=Hsd17b4 PE=2 SV=1;sp|P51660|DHB4_MOUSE Peroxisomal multifunctional enzyme type 2 OS=Mus	3	6	6	11.7	79.423	735	41.756	6.5	11.7	78381000	190240000	2.42712
P51863;Q921S5	V-type proton ATPase subunit d 1 (V-ATPase subunit d 1) (P39) (Physophilin) (V-ATPase 40 kDa accessory protein) (V-ATPase AC39 subunit) (Vacuolar proton pump subunit d 1)	Atp6v0d1 Atp6d	sp|P51863|VA0D1_MOUSE V-type proton ATPase subunit d 1 OS=Mus musculus OX=10090 GN=Atp6v0d1 PE=1 SV=2;tr|Q921S5|Q921S5_MOUSE V-type proton ATPase subunit OS=Mus musculus OX=10090 GN=Atp6v0d1 PE=2 SV=1	2	6	6	26.2	40.301	351	56.283	23.4	26.2	139790000	1398300000	10.0029
Q8BPS5;Q8C2E6;Q544N9;Q3TRK9;P53986;Q8C571;Q3UWP4;Q3TIU1	Monocarboxylate transporter 1 (Solute carrier family 16 member 1)	Slc16a1	tr|Q8BPS5|Q8BPS5_MOUSE Monocarboxylate transporter 1 OS=Mus musculus OX=10090 GN=Slc16a1 PE=2 SV=2;tr|Q8C2E6|Q8C2E6_MOUSE Monocarboxylate transporter 1 OS=Mus musculus OX=10090 GN=Slc16a1 PE=2 SV=1;tr|Q544N9|Q544N9_MOUSE Monocarboxylate transporter 1 OS=Mu	8	6	6	21.5	38.157	349	53.234	21.5	18.9	5296000000	2224800000	0.420091
P54116;Q8BPA1;Q99L68	Stomatin (Erythrocyte band 7 integral membrane protein) (Erythrocyte membrane protein band 7.2) (Protein 7.2b)	Stom Epb7.2 Epb72	sp|P54116|STOM_MOUSE Stomatin OS=Mus musculus OX=10090 GN=Stom PE=1 SV=3;tr|Q8BPA1|Q8BPA1_MOUSE PHB domain-containing protein OS=Mus musculus OX=10090 GN=Stom PE=2 SV=1;tr|Q99L68|Q99L68_MOUSE Stom protein OS=Mus musculus OX=10090 GN=Stom PE=2 SV=1	3	6	6	26.1	31.375	284	59.172	21.1	20.1	149300000	239290000	1.60275
Q8BMA4;Q5SW83;P61161	Uncharacterized protein		tr|Q8BMA4|Q8BMA4_MOUSE Uncharacterized protein OS=Mus musculus OX=10090 PE=2 SV=1;tr|Q5SW83|Q5SW83_MOUSE Uncharacterized protein OS=Mus musculus OX=10090 GN=Actr2 PE=1 SV=1;sp|P61161|ARP2_MOUSE Actin-related protein 2 OS=Mus musculus OX=10090 GN=Actr2 PE=1	3	6	6	20.9	37.322	330	50.547	20.9	10	569290000	133460000	0.234432
Q4FZE6;P62082	40S ribosomal protein S7	Rps7 Rps7A	tr|Q4FZE6|Q4FZE6_MOUSE 40S ribosomal protein S7 OS=Mus musculus OX=10090 GN=Rps7 PE=2 SV=1;sp|P62082|RS7_MOUSE 40S ribosomal protein S7 OS=Mus musculus OX=10090 GN=Rps7 PE=2 SV=1	2	6	6	43.8	22.127	194	37.188	35.6	43.8	151390000	1213400000	8.01506
Q542I9;P62192	AAA domain-containing protein	Psmc1	tr|Q542I9|Q542I9_MOUSE AAA domain-containing protein OS=Mus musculus OX=10090 GN=Psmc1 PE=1 SV=1;sp|P62192|PRS4_MOUSE 26S proteasome regulatory subunit 4 OS=Mus musculus OX=10090 GN=Psmc1 PE=1 SV=1	2	6	6	20.7	49.184	440	70.291	18.6	20.7	512660000	445780000	0.869543
Q3TK95;P63073;A0A0G2JGT5;A0A0G2JH04;Q8C470;A0A0G2JFB4;A0A0G2JG98	Uncharacterized protein	Eif4e	tr|Q3TK95|Q3TK95_MOUSE Uncharacterized protein OS=Mus musculus OX=10090 GN=Eif4e PE=1 SV=1;sp|P63073|IF4E_MOUSE Eukaryotic translation initiation factor 4E OS=Mus musculus OX=10090 GN=Eif4e PE=1 SV=1;tr|A0A0G2JGT5|A0A0G2JGT5_MOUSE Eukaryotic translation in	7	6	6	37.8	25.053	217	45.612	37.8	37.8	775570000	176830000	0.228
Q5M9K7;P63325;Q3U9P0;A0A338P7K4;A0A3B2W864;A0A338P731;Q3UW83	Ribosomal protein S10	Rps10	tr|Q5M9K7|Q5M9K7_MOUSE Ribosomal protein S10 OS=Mus musculus OX=10090 GN=Rps10 PE=1 SV=1;sp|P63325|RS10_MOUSE 40S ribosomal protein S10 OS=Mus musculus OX=10090 GN=Rps10 PE=1 SV=1;tr|Q3U9P0|Q3U9P0_MOUSE S10_plectin domain-containing protein OS=Mus musculus	7	6	6	33.3	18.916	165	72.639	20	33.3	122430000	305690000	2.49686
P70698	CTP synthase 1 (EC 6.3.4.2) (CTP synthetase 1) (UTP--ammonia ligase 1)	Ctps1 Ctps	sp|P70698|PYRG1_MOUSE CTP synthase 1 OS=Mus musculus OX=10090 GN=Ctps1 PE=1 SV=2	1	7	6	15.2	66.682	591	64.744	13.2	13.5	194890000	269580000	1.38324
P99027;A0A5F8MPY2	60S acidic ribosomal protein P2	Rplp2	sp|P99027|RLA2_MOUSE 60S acidic ribosomal protein P2 OS=Mus musculus OX=10090 GN=Rplp2 PE=1 SV=3;tr|A0A5F8MPY2|A0A5F8MPY2_MOUSE 60S acidic ribosomal protein P2 OS=Mus musculus OX=10090 GN=Rplp2-ps1 PE=3 SV=1	2	6	6	60.9	11.651	115	55.507	60.9	60.9	506520000	2728600000	5.38695
Q08288;D3Z5X8;D3Z7N3;D3Z345	Cell growth-regulating nucleolar protein (Ly1 antibody-reactive protein) (Protein expressed in male leptotene and zygotene spermatocytes 264) (MLZ-264)	Lyar	sp|Q08288|LYAR_MOUSE Cell growth-regulating nucleolar protein OS=Mus musculus OX=10090 GN=Lyar PE=1 SV=2	4	6	6	18.3	43.735	388	61.692	0	18.3	0	142000000	#DIV/0!
Q3U6Y9;Q8C6Z4;Q3UAI3;Q3TA14;Q08857;Q3UC79;A0A0G2JFB7;E7D893	Glycoprotein IIIb (PAS IV) (PAS-4) (Platelet glycoprotein 4) (Platelet glycoprotein IV)	Cd36	tr|Q3U6Y9|Q3U6Y9_MOUSE Glycoprotein IIIb OS=Mus musculus OX=10090 GN=Cd36 PE=2 SV=1;tr|Q8C6Z4|Q8C6Z4_MOUSE Glycoprotein IIIb OS=Mus musculus OX=10090 GN=Cd36 PE=2 SV=1;tr|Q3UAI3|Q3UAI3_MOUSE Glycoprotein IIIb OS=Mus musculus OX=10090 GN=Cd36 PE=1 SV=1;tr|Q	8	6	6	18.6	50.224	446	44.859	18.6	17	1007900000	301260000	0.298899
Q3U094;Q3TCE7;Q91Z25;Q9WV32;Q3TBA2;F6THG2;F6VVE6	Actin-related protein 2/3 complex subunit	Arpc1b	tr|Q3U094|Q3U094_MOUSE Actin-related protein 2/3 complex subunit OS=Mus musculus OX=10090 GN=Arpc1b PE=2 SV=1;tr|Q3TCE7|Q3TCE7_MOUSE Actin-related protein 2/3 complex subunit OS=Mus musculus OX=10090 GN=Arpc1b PE=2 SV=1;tr|Q91Z25|Q91Z25_MOUSE Actin-related	7	6	6	23.7	41.064	372	71.712	23.7	17.7	527610000	188570000	0.357404
Q3TD51;Q570Z8;Q7M6Y3;A0A140LHG9;A0A140LHQ8;A0A087WSI9;Q8BQA2;A0A1L1SUR7;Q3TWS4;Q3UI39;E9Q9A3;E9QQ05;A0A5F8MPL3;E9QLK9;Q61548	ENTH domain-containing protein	Picalm	tr|Q3TD51|Q3TD51_MOUSE ENTH domain-containing protein OS=Mus musculus OX=10090 GN=Picalm PE=2 SV=1;tr|Q570Z8|Q570Z8_MOUSE MKIAA4114 protein (Fragment) OS=Mus musculus OX=10090 GN=Picalm PE=2 SV=1;sp|Q7M6Y3|PICAL_MOUSE Phosphatidylinositol-binding clathrin	15	6	6	11.4	64.647	597	45.313	10.1	5.9	154720000	96053000	0.620818
Q3TDG9;Q9ER00;Q3TIL5	t-SNARE coiled-coil homology domain-containing protein	Stx12	tr|Q3TDG9|Q3TDG9_MOUSE t-SNARE coiled-coil homology domain-containing protein OS=Mus musculus OX=10090 GN=Stx12 PE=2 SV=1;sp|Q9ER00|STX12_MOUSE Syntaxin-12 OS=Mus musculus OX=10090 GN=Stx12 PE=1 SV=1;tr|Q3TIL5|Q3TIL5_MOUSE t-SNARE coiled-coil homology doma	3	6	6	29.2	31.179	274	47.781	29.2	23.7	310820000	427480000	1.37533
Q3TM67;Q3TI79;Q9ESX5;B7ZCL7;A2AN81;F6YUI5;F6S1S5	PUA domain-containing protein	Dkc1 BC068171	tr|Q3TM67|Q3TM67_MOUSE PUA domain-containing protein OS=Mus musculus OX=10090 GN=Dkc1 PE=2 SV=1;tr|Q3TI79|Q3TI79_MOUSE PUA domain-containing protein OS=Mus musculus OX=10090 GN=Dkc1 PE=2 SV=1;sp|Q9ESX5|DKC1_MOUSE H/ACA ribonucleoprotein complex subunit DKC	7	6	6	16.3	57.401	509	46.35	2.6	16.3	27999000	288240000	10.2947
Q3TJH1;Q9DC51;A2AE32;Q9D7B3;Q543S2;B2RVZ3;A2AE33;P20612;P18872;Q3V3I2;P50149;Q9JJ21;A2AE31;Q8C040;Q8BSY7;Q9WUC0;D3Z2M7;Q8BHK8;F6QPU5;Q3TY78;Q66L47;Q8CGK7	Uncharacterized protein	Gnai3	tr|Q3TJH1|Q3TJH1_MOUSE Uncharacterized protein OS=Mus musculus OX=10090 GN=Gnai3 PE=2 SV=1;sp|Q9DC51|GNAI3_MOUSE Guanine nucleotide-binding protein G(i) subunit alpha-3 OS=Mus musculus OX=10090 GN=Gnai3 PE=1 SV=3	22	9	6	33.9	40.539	354	68.828	33.9	31.6	895600000	699300000	0.780817
Q3TLX1;Q99KQ4	Nicotinamide phosphoribosyltransferase (NAmPRTase) (EC 2.4.2.12)	Nampt Pbef1	tr|Q3TLX1|Q3TLX1_MOUSE Nicotinamide phosphoribosyltransferase OS=Mus musculus OX=10090 GN=Nampt PE=2 SV=1;sp|Q99KQ4|NAMPT_MOUSE Nicotinamide phosphoribosyltransferase OS=Mus musculus OX=10090 GN=Nampt PE=1 SV=1	2	6	6	20.6	55.462	491	41.271	16.5	20.6	111970000	114380000	1.02152
Q3U3C4;Q3TRJ7;Q62419;Q3TJB4;A0A3B2W7K0;A2ALV1;Q8BXU5;A2ALV3;Q62420	Uncharacterized protein	Sh3gl1	tr|Q3U3C4|Q3U3C4_MOUSE Uncharacterized protein OS=Mus musculus OX=10090 GN=Sh3gl1 PE=2 SV=1;tr|Q3TRJ7|Q3TRJ7_MOUSE SH3-domain GRB2-like 1 OS=Mus musculus OX=10090 GN=Sh3gl1 PE=1 SV=1;sp|Q62419|SH3G1_MOUSE Endophilin-A2 OS=Mus musculus OX=10090 GN=Sh3gl1 PE	9	6	6	22	41.532	368	63.359	22	11.1	191350000	54389000	0.284238
Q3U1M9;Q3U9R0;Q61549;Q3S4B0;O08745;A0A3B2WB94;O08743;O08744;Q6LCD7	Uncharacterized protein	Adgre1 Emr1	tr|Q3U1M9|Q3U1M9_MOUSE Uncharacterized protein OS=Mus musculus OX=10090 GN=Adgre1 PE=2 SV=1;tr|Q3U9R0|Q3U9R0_MOUSE Uncharacterized protein OS=Mus musculus OX=10090 GN=Adgre1 PE=1 SV=1;sp|Q61549|AGRE1_MOUSE Adhesion G protein-coupled receptor E1 OS=Mus musc	9	6	6	11.4	100.45	915	48.63	11.4	9.5	391450000	182840000	0.467084
Q3U6A2;Q8C2Q3;E9QL13;Q62019;J3QN51;J3QPT3;B0LM42;F7BGR7	Uncharacterized protein	Rbm14	tr|Q3U6A2|Q3U6A2_MOUSE Uncharacterized protein OS=Mus musculus OX=10090 GN=Rbm14 PE=2 SV=1;sp|Q8C2Q3|RBM14_MOUSE RNA-binding protein 14 OS=Mus musculus OX=10090 GN=Rbm14 PE=1 SV=1;tr|E9QL13|E9QL13_MOUSE RNA-binding protein 14 OS=Mus musculus OX=10090 GN=Rb	8	6	6	14.2	66.125	636	56.683	0	14.2	0	256370000	#DIV/0!
Q3U741;Q501J6;Q3TU25;Q8K392;Q78W10;Q3U6Y5	RNA helicase (EC 3.6.4.13)	Ddx17	tr|Q3U741|Q3U741_MOUSE RNA helicase OS=Mus musculus OX=10090 GN=Ddx17 PE=1 SV=1;sp|Q501J6|DDX17_MOUSE Probable ATP-dependent RNA helicase DDX17 OS=Mus musculus OX=10090 GN=Ddx17 PE=1 SV=1;tr|Q3TU25|Q3TU25_MOUSE RNA helicase OS=Mus musculus OX=10090 GN=Ddx1	6	11	6	18.6	72.584	652	46.855	16.4	15.5	157500000	179690000	1.14089
Q3U944;Q9D0F3	L-type lectin-like domain-containing protein	Lman1	tr|Q3U944|Q3U944_MOUSE L-type lectin-like domain-containing protein OS=Mus musculus OX=10090 GN=Lman1 PE=2 SV=1;sp|Q9D0F3|LMAN1_MOUSE Protein ERGIC-53 OS=Mus musculus OX=10090 GN=Lman1 PE=1 SV=1	2	6	6	13.9	61.273	547	51.539	13.9	12.4	247650000	581360000	2.34751
Q80W39;Q3UJB0;Q3UBH2;Q3UAI4;Q3UQU5;Q8BL33;Q9CS24;A0A494B9S9	Splicing factor 3b, subunit 2	Sf3b2	tr|Q80W39|Q80W39_MOUSE Splicing factor 3b, subunit 2 OS=Mus musculus OX=10090 GN=Sf3b2 PE=2 SV=1;tr|Q3UJB0|Q3UJB0_MOUSE Splicing factor 3b, subunit 2 OS=Mus musculus OX=10090 GN=Sf3b2 PE=1 SV=1;tr|Q3UBH2|Q3UBH2_MOUSE SAP domain-containing protein OS=Mus mu	8	6	6	7.2	98.183	878	50.911	4.9	7.2	38492000	278960000	7.24722
Q5RKN9;Q3UAS2;Q3UJV2;P47753;Q3TLJ0;A0A0G2JE27;A0A0N4SVM0;D6RCW7	F-actin-capping protein subunit alpha	Capza1	tr|Q5RKN9|Q5RKN9_MOUSE F-actin-capping protein subunit alpha OS=Mus musculus OX=10090 GN=Capza1 PE=1 SV=1;tr|Q3UAS2|Q3UAS2_MOUSE F-actin-capping protein subunit alpha OS=Mus musculus OX=10090 GN=Capza1 PE=2 SV=1;tr|Q3UJV2|Q3UJV2_MOUSE F-actin-capping prote	8	7	6	39.9	32.953	286	52.756	34.3	39.9	462830000	323120000	0.69814
Q3UCF2;Q6A068;Q05DT4;A0A1W2P7S8;A0A1W2P855;A0A1W2P7Z8;A0A1W2P7H4;A0A1W2P6Q8	Uncharacterized protein	Cdc5l	tr|Q3UCF2|Q3UCF2_MOUSE Uncharacterized protein OS=Mus musculus OX=10090 GN=Cdc5l PE=1 SV=1;sp|Q6A068|CDC5L_MOUSE Cell division cycle 5-like protein OS=Mus musculus OX=10090 GN=Cdc5l PE=1 SV=2;tr|Q05DT4|Q05DT4_MOUSE Cdc5l protein OS=Mus musculus OX=10090 GN	8	6	6	9.5	92.188	802	38.721	0	9.5	0	145480000	#DIV/0!
Q4FK16;Q99M50;Q3UDV5;Q9JJ00	Phospholipid scramblase	Plscr1	tr|Q4FK16|Q4FK16_MOUSE Phospholipid scramblase OS=Mus musculus OX=10090 GN=Plscr1 PE=2 SV=1;tr|Q99M50|Q99M50_MOUSE Phospholipid scramblase OS=Mus musculus OX=10090 GN=Plscr1 PE=2 SV=1;tr|Q3UDV5|Q3UDV5_MOUSE Phospholipid scramblase OS=Mus musculus OX=10090	4	6	6	27.4	26.345	234	41.197	27.4	21.8	818660000	681570000	0.832543
Q3UJA1;Q6P5B0	NUC173 domain-containing protein	Rrp12 AA408556	tr|Q3UJA1|Q3UJA1_MOUSE NUC173 domain-containing protein OS=Mus musculus OX=10090 GN=Rrp12 PE=1 SV=1;sp|Q6P5B0|RRP12_MOUSE RRP12-like protein OS=Mus musculus OX=10090 GN=Rrp12 PE=1 SV=1	2	6	6	5.4	143.13	1295	49.806	4.6	4.5	125030000	171540000	1.37199
Q3UQM7;Q9Z127;Q3UG45	Uncharacterized protein	Slc7a5	tr|Q3UQM7|Q3UQM7_MOUSE Uncharacterized protein OS=Mus musculus OX=10090 GN=Slc7a5 PE=2 SV=1;sp|Q9Z127|LAT1_MOUSE Large neutral amino acids transporter small subunit 1 OS=Mus musculus OX=10090 GN=Slc7a5 PE=1 SV=2	3	7	6	11.7	55.872	512	85.412	11.7	11.7	1477200000	1040400000	0.704305
Q3UXI9;Q9CXY6	DZF domain-containing protein	Ilf2	tr|Q3UXI9|Q3UXI9_MOUSE DZF domain-containing protein OS=Mus musculus OX=10090 GN=Ilf2 PE=2 SV=1;sp|Q9CXY6|ILF2_MOUSE Interleukin enhancer-binding factor 2 OS=Mus musculus OX=10090 GN=Ilf2 PE=1 SV=1	2	6	6	25.4	43.01	390	38.061	18.2	20.3	54011000	156670000	2.90071
Q3V1L5;Q7M739;F6ZDS4;Q8BU18;Q05CS8;Q32P08;Q8BK71;Q3TZB5	Nucleoprotein TPR (Fragment)	Tpr	tr|Q3V1L5|Q3V1L5_MOUSE Nucleoprotein TPR (Fragment) OS=Mus musculus OX=10090 GN=Tpr PE=2 SV=1;tr|Q7M739|Q7M739_MOUSE Nucleoprotein TPR OS=Mus musculus OX=10090 GN=Tpr PE=1 SV=1;sp|F6ZDS4|TPR_MOUSE Nucleoprotein TPR OS=Mus musculus OX=10090 GN=Tpr PE=1 SV=1	8	6	6	5.7	144.43	1244	55.844	1	5.7	8336500	116580000	13.9843
Q3V214;Q80UW8;Q8R0H0;Q8CI23	DNA-directed RNA polymerase II subunit E (RPB5 homolog)	Polr2e	tr|Q3V214|Q3V214_MOUSE DNA-directed RNA polymerase II subunit E OS=Mus musculus OX=10090 GN=Polr2e PE=1 SV=1;sp|Q80UW8|RPAB1_MOUSE DNA-directed RNA polymerases I, II, and III subunit RPABC1 OS=Mus musculus OX=10090 GN=Polr2e PE=1 SV=1;tr|Q8R0H0|Q8R0H0_MOUS	4	6	6	34.3	24.57	210	42.759	34.3	34.3	114560000	178740000	1.56023
Q3V3R1	Monofunctional C1-tetrahydrofolate synthase, mitochondrial (EC 6.3.4.3) (Formyltetrahydrofolate synthetase)	Mthfd1l Fthfsdc1	sp|Q3V3R1|C1TM_MOUSE Monofunctional C1-tetrahydrofolate synthase, mitochondrial OS=Mus musculus OX=10090 GN=Mthfd1l PE=1 SV=2	1	7	6	8.8	105.73	977	53.242	2.3	8.1	11179000	159740000	14.2893
Q5M8R9;Q4FJN9;Q920E5;Q3TMB3;Q3US29;A0A0G2JEA5;A0A0G2JDJ5;A0A0G2JEB3;A0A0G2JE82	Farnesyl diphosphate synthetase	Fdps	tr|Q5M8R9|Q5M8R9_MOUSE Farnesyl diphosphate synthetase OS=Mus musculus OX=10090 GN=Fdps PE=2 SV=1;tr|Q4FJN9|Q4FJN9_MOUSE Fdps protein OS=Mus musculus OX=10090 GN=Fdps PE=1 SV=1;sp|Q920E5|FPPS_MOUSE Farnesyl pyrophosphate synthase OS=Mus musculus OX=10090 G	9	6	6	23.8	40.565	353	36.924	23.8	12.5	215810000	55256000	0.25604
Q7TPU5;Q4TVN0;Q9CXF4;Q9CRG4;Q3TSE1	TBC1 domain family, member 15	Tbc1d15	tr|Q7TPU5|Q7TPU5_MOUSE TBC1 domain family, member 15 OS=Mus musculus OX=10090 GN=Tbc1d15 PE=2 SV=1;tr|Q4TVN0|Q4TVN0_MOUSE TBC1 domain family member 15 OS=Mus musculus OX=10090 GN=Tbc1d15 PE=2 SV=1;sp|Q9CXF4|TBC15_MOUSE TBC1 domain family member 15 OS=Mus m	5	6	6	10.4	76.541	671	43.929	8.8	10.4	55834000	104330000	1.86857
Q6ZWZ7;Q6PHZ1;Q505B1;Q80V08;Q9CPR4;B2RY53	60S ribosomal protein L17	Rpl17	tr|Q6ZWZ7|Q6ZWZ7_MOUSE 60S ribosomal protein L17 OS=Mus musculus OX=10090 GN=Rpl17 PE=1 SV=1;tr|Q6PHZ1|Q6PHZ1_MOUSE 60S ribosomal protein L17 OS=Mus musculus OX=10090 GN=Rpl17 PE=2 SV=1;tr|Q505B1|Q505B1_MOUSE 60S ribosomal protein L17 (Fragment) OS=Mus mus	6	6	6	32.1	21.397	184	44.358	27.2	32.1	237540000	1799100000	7.57388
Q50HX4;Q50HX2;Q91V41;Q50HX3;Q50HX1;Q50HX0;Q50HW9;A0A2R8VHW9;Q3U9E0	Ras-related protein Rab-14	Rab14 rab14	tr|Q50HX4|Q50HX4_MOUSE Ras-related protein Rab-14 OS=Mus musculus OX=10090 GN=Rab14 PE=1 SV=1;tr|Q50HX2|Q50HX2_MOUSE Ras-related protein Rab-14 OS=Mus musculus OX=10090 GN=Rab14 PE=2 SV=1;sp|Q91V41|RAB14_MOUSE Ras-related protein Rab-14 OS=Mus musculus OX=	9	6	6	41.4	23.897	215	45.814	41.4	41.4	268620000	354450000	1.31952
Q545I6;Q9ES94;Q9WUU7	Cathepsin X (EC 3.4.18.1)	Ctsz	tr|Q545I6|Q545I6_MOUSE Cathepsin X OS=Mus musculus OX=10090 GN=Ctsz PE=1 SV=1;tr|Q9ES94|Q9ES94_MOUSE Cathepsin X OS=Mus musculus OX=10090 GN=Ctsz PE=2 SV=1;sp|Q9WUU7|CATZ_MOUSE Cathepsin Z OS=Mus musculus OX=10090 GN=Ctsz PE=1 SV=1	3	6	6	22.9	33.996	306	43.389	16.7	22.9	242530000	350940000	1.447
Q571A2;Q9D4H8;E0CYT5;H7BX52;A0A3Q4EBZ1;A0A3Q4EI83	MKIAA4106 protein (Fragment)	Cul2 mKIAA4106	tr|Q571A2|Q571A2_MOUSE MKIAA4106 protein (Fragment) OS=Mus musculus OX=10090 GN=Cul2 PE=2 SV=1;sp|Q9D4H8|CUL2_MOUSE Cullin-2 OS=Mus musculus OX=10090 GN=Cul2 PE=1 SV=2;tr|E0CYT5|E0CYT5_MOUSE Cullin-2 (Fragment) OS=Mus musculus OX=10090 GN=Cul2 PE=1 SV=1;tr	6	6	6	9.5	87.181	748	57.007	9.5	6.7	158130000	92306000	0.583735
Q8BK66;Q5SVX3;Q9D0R4;Q5SVX2	RNA helicase (EC 3.6.4.13)	Ddx56	tr|Q8BK66|Q8BK66_MOUSE RNA helicase OS=Mus musculus OX=10090 GN=Ddx56 PE=2 SV=1;tr|Q5SVX3|Q5SVX3_MOUSE RNA helicase OS=Mus musculus OX=10090 GN=Ddx56 PE=2 SV=1;sp|Q9D0R4|DDX56_MOUSE Probable ATP-dependent RNA helicase DDX56 OS=Mus musculus OX=10090 GN=Ddx5	4	6	6	11.5	61.179	546	45.043	4.4	11.5	15689000	159760000	10.1829
Q60932;Q3TIG8;Q3THL7;Q3U6K8;F2Z471	Voltage-dependent anion-selective channel protein 1 (VDAC-1) (mVDAC1) (Outer mitochondrial membrane protein porin 1) (Plasmalemmal porin) (Voltage-dependent anion-selective channel protein 5) (VDAC-5) (mVDAC5)	Vdac1 Vdac5	sp|Q60932|VDAC1_MOUSE Voltage-dependent anion-selective channel protein 1 OS=Mus musculus OX=10090 GN=Vdac1 PE=1 SV=3;tr|Q3TIG8|Q3TIG8_MOUSE Voltage-dependent anion-selective channel protein 1 OS=Mus musculus OX=10090 GN=Vdac1 PE=2 SV=1;tr|Q3THL7|Q3THL7_MO	5	6	6	29.7	32.351	296	57.095	0	29.7	0	930420000	#DIV/0!
Q61599;D3YWL7	Rho GDP-dissociation inhibitor 2 (Rho GDI 2) (D4) (Rho-GDI beta)	Arhgdib Gdid4	sp|Q61599|GDIR2_MOUSE Rho GDP-dissociation inhibitor 2 OS=Mus musculus OX=10090 GN=Arhgdib PE=1 SV=3	2	6	6	38.5	22.851	200	50.273	38.5	23.5	538410000	116070000	0.215579
Q7TN29;Q3UM96	Stromal membrane-associated protein 2 (Stromal membrane-associated protein 1-like)	Smap2 Smap1l	sp|Q7TN29|SMAP2_MOUSE Stromal membrane-associated protein 2 OS=Mus musculus OX=10090 GN=Smap2 PE=1 SV=1	2	6	6	18.2	46.577	428	57.597	11	15.7	103230000	137600000	1.33295
Q8BJY1;Q921U5	26S proteasome non-ATPase regulatory subunit 5 (26S protease subunit S5 basic) (26S proteasome subunit S5B)	Psmd5 Kiaa0072	sp|Q8BJY1|PSMD5_MOUSE 26S proteasome non-ATPase regulatory subunit 5 OS=Mus musculus OX=10090 GN=Psmd5 PE=1 SV=4	2	6	6	14.5	55.971	504	45.541	14.5	14.5	155610000	128960000	0.828739
Q8BMS1;Q3TB39	Trifunctional enzyme subunit alpha, mitochondrial (Monolysocardiolipin acyltransferase) (EC 2.3.1.-) (TP-alpha) [Includes: Long-chain enoyl-CoA hydratase (EC 4.2.1.17); Long chain 3-hydroxyacyl-CoA dehydrogenase (EC 1.1.1.211)]	Hadha	sp|Q8BMS1|ECHA_MOUSE Trifunctional enzyme subunit alpha, mitochondrial OS=Mus musculus OX=10090 GN=Hadha PE=1 SV=1	2	6	6	9.6	82.669	763	37.134	0	9.6	0	103040000	#DIV/0!
Q8BPU7;Q571D6;Q8BHL5;A2A5A7;D6RHT3;Q5GMG0;F6YXR3	Engulfment and cell motility protein 1 (Protein ced-12 homolog)	Elmo1	sp|Q8BPU7|ELMO1_MOUSE Engulfment and cell motility protein 1 OS=Mus musculus OX=10090 GN=Elmo1 PE=1 SV=2;tr|Q571D6|Q571D6_MOUSE MKIAA0281 protein (Fragment) OS=Mus musculus OX=10090 GN=Elmo1 PE=2 SV=1;sp|Q8BHL5|ELMO2_MOUSE Engulfment and cell motility prot	7	6	6	10	83.935	727	38.625	10	10	137130000	203610000	1.4848
Q8C140;Q9QXX4;Q91YK1	Uncharacterized protein	Slc25a13	tr|Q8C140|Q8C140_MOUSE Uncharacterized protein OS=Mus musculus OX=10090 GN=Slc25a13 PE=2 SV=1;sp|Q9QXX4|CMC2_MOUSE Calcium-binding mitochondrial carrier protein Aralar2 OS=Mus musculus OX=10090 GN=Slc25a13 PE=1 SV=1;tr|Q91YK1|Q91YK1_MOUSE Slc25a13 protein	3	7	6	12.4	74.338	675	45.103	3.9	12.4	35493000	165860000	4.67303
Q8JZM7	Parafibromin (Cell division cycle protein 73 homolog) (Hyperparathyroidism 2 protein homolog)	Cdc73	sp|Q8JZM7|CDC73_MOUSE Parafibromin OS=Mus musculus OX=10090 GN=Cdc73 PE=1 SV=1	1	6	6	9.6	60.576	531	35.882	2.8	9.6	31121000	109450000	3.51692
Q8R010;Q8R3V2	Aminoacyl tRNA synthase complex-interacting multifunctional protein 2 (Multisynthase complex auxiliary component p38) (Protein JTV-1)	Aimp2 Jtv1	sp|Q8R010|AIMP2_MOUSE Aminoacyl tRNA synthase complex-interacting multifunctional protein 2 OS=Mus musculus OX=10090 GN=Aimp2 PE=1 SV=2;tr|Q8R3V2|Q8R3V2_MOUSE Aminoacyl tRNA synthase complex-interacting multifunctional protein 2 OS=Mus musculus OX=10090 GN	2	6	6	34.1	35.377	320	44.365	34.1	34.1	319890000	242300000	0.757448
Q8R0J7	Vacuolar protein sorting-associated protein 37B (Vps37B) (ESCRT-I complex subunit VPS37B)	Vps37b	sp|Q8R0J7|VP37B_MOUSE Vacuolar protein sorting-associated protein 37B OS=Mus musculus OX=10090 GN=Vps37b PE=1 SV=1	1	6	6	34.7	31.055	285	40.86	34.7	32.3	117590000	35343000	0.300561
Q8R3N1;Q3TSX5;Q9CSY8	Nucleolar protein 14 (Nucleolar complex protein 14)	Nop14 Nol14	sp|Q8R3N1|NOP14_MOUSE Nucleolar protein 14 OS=Mus musculus OX=10090 GN=Nop14 PE=1 SV=2;tr|Q3TSX5|Q3TSX5_MOUSE Uncharacterized protein (Fragment) OS=Mus musculus OX=10090 GN=Nop14 PE=2 SV=1	3	6	6	9.2	98.768	860	46.053	5.1	9.2	85577000	248170000	2.89996
Q921N6;H3BLJ6	Probable ATP-dependent RNA helicase DDX27 (EC 3.6.4.13) (DEAD box protein 27)	Ddx27	sp|Q921N6|DDX27_MOUSE Probable ATP-dependent RNA helicase DDX27 OS=Mus musculus OX=10090 GN=Ddx27 PE=1 SV=3;tr|H3BLJ6|H3BLJ6_MOUSE RNA helicase (Fragment) OS=Mus musculus OX=10090 GN=Ddx27 PE=1 SV=1	2	6	6	8.7	85.938	760	43.063	5.8	7.1	43965000	63764000	1.45034
Q922J9;D3Z5W6;D3Z4N9;D3Z072	Fatty acyl-CoA reductase 1 (EC 1.2.1.84)	Far1	sp|Q922J9|FACR1_MOUSE Fatty acyl-CoA reductase 1 OS=Mus musculus OX=10090 GN=Far1 PE=1 SV=1;tr|D3Z5W6|D3Z5W6_MOUSE Fatty acyl-CoA reductase (Fragment) OS=Mus musculus OX=10090 GN=Far1 PE=1 SV=1;tr|D3Z4N9|D3Z4N9_MOUSE Fatty acyl-CoA reductase (Fragment) OS=	4	6	6	13	59.434	515	43.288	2.7	13	16043000	308360000	19.2208
Q99J09;F7D5L2;Q3V2T0	Methylosome protein 50 (MEP-50) (WD repeat-containing protein 77)	Wdr77 Mep50	sp|Q99J09|MEP50_MOUSE Methylosome protein 50 OS=Mus musculus OX=10090 GN=Wdr77 PE=1 SV=1;tr|F7D5L2|F7D5L2_MOUSE Methylosome protein 50 (Fragment) OS=Mus musculus OX=10090 GN=Wdr77 PE=1 SV=1	3	6	6	26.3	36.942	342	70.395	26.3	21.9	221040000	72360000	0.327362
Q99JB2;A2AG41;A2AG39;F6WI02	Stomatin-like protein 2, mitochondrial (SLP-2) (mslp2)	Stoml2 Slp2	sp|Q99JB2|STML2_MOUSE Stomatin-like protein 2, mitochondrial OS=Mus musculus OX=10090 GN=Stoml2 PE=1 SV=1;tr|A2AG41|A2AG41_MOUSE Stomatin-like protein 2, mitochondrial (Fragment) OS=Mus musculus OX=10090 GN=Stoml2 PE=1 SV=10;tr|A2AG39|A2AG39_MOUSE Stomatin	4	6	6	26.6	38.384	353	44.742	3.1	26.6	9501200	249410000	26.2504
Q99JX4;A2A702	Eukaryotic translation initiation factor 3 subunit M (eIF3m) (PCI domain-containing protein 1)	Eif3m Pcid1	sp|Q99JX4|EIF3M_MOUSE Eukaryotic translation initiation factor 3 subunit M OS=Mus musculus OX=10090 GN=Eif3m PE=1 SV=1	2	6	6	26.7	42.516	374	67.797	26.7	22.5	520370000	321340000	0.617522
Q9CR68	Cytochrome b-c1 complex subunit Rieske, mitochondrial (EC 7.1.1.8) (Complex III subunit 5) (Cytochrome b-c1 complex subunit 5) (Rieske iron-sulfur protein) (RISP) (Rieske protein UQCRFS1) (Ubiquinol-cytochrome c reductase iron-sulfur subunit) [Cleaved into: Cytochrome b-c1 complex subunit 9 (Su9) (Subunit 9) (8 kDa subunit 9) (Complex III subunit IX) (Cytochrome b-c1 complex subunit 11) (UQCRFS1 …	Uqcrfs1	sp|Q9CR68|UCRI_MOUSE Cytochrome b-c1 complex subunit Rieske, mitochondrial OS=Mus musculus OX=10090 GN=Uqcrfs1 PE=1 SV=1	1	6	6	25.2	29.367	274	34.67	0	25.2	0	191660000	#DIV/0!
Q9CXW4;Q8VC94;A2BH06	60S ribosomal protein L11	Rpl11	sp|Q9CXW4|RL11_MOUSE 60S ribosomal protein L11 OS=Mus musculus OX=10090 GN=Rpl11 PE=1 SV=4;tr|Q8VC94|Q8VC94_MOUSE 60S ribosomal protein L11 OS=Mus musculus OX=10090 GN=Rpl11 PE=2 SV=1;tr|A2BH06|A2BH06_MOUSE 60S ribosomal protein L11 (Fragment) OS=Mus muscu	3	6	6	32.6	20.252	178	45.989	32.6	32.6	1200600000	2459500000	2.04856
Q9CY64;A2ASB8;A2ASB7;A2ASB1;Q3TS98	Biliverdin reductase A (BVR A) (EC 1.3.1.24) (Biliverdin-IX alpha-reductase)	Blvra	sp|Q9CY64|BIEA_MOUSE Biliverdin reductase A OS=Mus musculus OX=10090 GN=Blvra PE=1 SV=1	5	6	6	26.1	33.524	295	39.955	26.1	3.1	312610000	8261800	0.0264285
Q9CYG7	Mitochondrial import receptor subunit TOM34 (Translocase of outer membrane 34 kDa subunit)	Tomm34	sp|Q9CYG7|TOM34_MOUSE Mitochondrial import receptor subunit TOM34 OS=Mus musculus OX=10090 GN=Tomm34 PE=1 SV=1	1	6	6	29.1	34.278	309	67.371	29.1	29.1	120870000	213090000	1.76297
Q9D2G2	Dihydrolipoyllysine-residue succinyltransferase component of 2-oxoglutarate dehydrogenase complex, mitochondrial (EC 2.3.1.61) (2-oxoglutarate dehydrogenase complex component E2) (OGDC-E2) (Dihydrolipoamide succinyltransferase component of 2-oxoglutarate dehydrogenase complex) (E2K)	Dlst	sp|Q9D2G2|ODO2_MOUSE Dihydrolipoyllysine-residue succinyltransferase component of 2-oxoglutarate dehydrogenase complex, mitochondrial OS=Mus musculus OX=10090 GN=Dlst PE=1 SV=1	1	6	6	17.4	48.994	454	47.535	8.8	17.4	66194000	445860000	6.73566
Q9DCN2;Q9CY59;F2Z456	NADH-cytochrome b5 reductase 3 (B5R) (Cytochrome b5 reductase) (EC 1.6.2.2) (Diaphorase-1) [Cleaved into: NADH-cytochrome b5 reductase 3 membrane-bound form; NADH-cytochrome b5 reductase 3 soluble form]	Cyb5r3 Dia1	sp|Q9DCN2|NB5R3_MOUSE NADH-cytochrome b5 reductase 3 OS=Mus musculus OX=10090 GN=Cyb5r3 PE=1 SV=3;tr|Q9CY59|Q9CY59_MOUSE NADH-cytochrome b5 reductase OS=Mus musculus OX=10090 GN=Cyb5r3 PE=2 SV=1;tr|F2Z456|F2Z456_MOUSE NADH-cytochrome b5 reductase OS=Mus mu	3	6	6	26.9	34.127	301	62.641	12.3	26.9	30993000	636150000	20.5256
Q9JHU9;A0A1B0GS86	Inositol-3-phosphate synthase 1 (IPS 1) (EC 5.5.1.4) (Myo-inositol 1-phosphate synthase) (MI-1-P synthase) (MIP synthase)	Isyna1 Ino1	sp|Q9JHU9|INO1_MOUSE Inositol-3-phosphate synthase 1 OS=Mus musculus OX=10090 GN=Isyna1 PE=1 SV=1	2	6	6	13.1	60.931	557	36.541	13.1	7.4	208330000	107330000	0.515192
Q9JJ28;Q3TUY1	Protein flightless-1 homolog	Flii Fli1 Fliih	sp|Q9JJ28|FLII_MOUSE Protein flightless-1 homolog OS=Mus musculus OX=10090 GN=Flii PE=1 SV=1	2	6	6	6.8	144.8	1271	40.153	6.1	5	80376000	86620000	1.07768
Q9JKX6;A0A0A6YVU1;A2ATT5	ADP-sugar pyrophosphatase (EC 3.6.1.13) (8-oxo-dGDP phosphatase) (EC 3.6.1.58) (Nuclear ATP-synthesis protein NUDIX5) (EC 2.7.7.96) (Nucleoside diphosphate-linked moiety X motif 5) (Nudix motif 5)	Nudt5	sp|Q9JKX6|NUDT5_MOUSE ADP-sugar pyrophosphatase OS=Mus musculus OX=10090 GN=Nudt5 PE=1 SV=1;tr|A0A0A6YVU1|A0A0A6YVU1_MOUSE ADP-sugar pyrophosphatase (Fragment) OS=Mus musculus OX=10090 GN=Nudt5 PE=1 SV=1;tr|A2ATT5|A2ATT5_MOUSE ADP-sugar pyrophosphatase (Fr	3	6	6	31.2	23.984	218	51.127	31.2	24.3	190530000	181430000	0.952238
Q9R1T2	SUMO-activating enzyme subunit 1 (Ubiquitin-like 1-activating enzyme E1A) [Cleaved into: SUMO-activating enzyme subunit 1, N-terminally processed]	Sae1 Aos1 Sua1 Ubl1a1 Uble1a	sp|Q9R1T2|SAE1_MOUSE SUMO-activating enzyme subunit 1 OS=Mus musculus OX=10090 GN=Sae1 PE=1 SV=1	1	6	6	25.7	38.62	350	37.684	25.7	14.6	208030000	79893000	0.384046
Q9WTI7	Unconventional myosin-Ic (Myosin I beta) (MMI-beta) (MMIb)	Myo1c	sp|Q9WTI7|MYO1C_MOUSE Unconventional myosin-Ic OS=Mus musculus OX=10090 GN=Myo1c PE=1 SV=2	1	6	6	7.9	121.94	1063	39.437	5.5	7.9	96975000	167510000	1.72735
Q9Z1Z0;A0A0J9YUG0	General vesicular transport factor p115 (Protein USO1 homolog) (Transcytosis-associated protein) (TAP) (Vesicle-docking protein)	Uso1 Vdp	sp|Q9Z1Z0|USO1_MOUSE General vesicular transport factor p115 OS=Mus musculus OX=10090 GN=Uso1 PE=1 SV=2	2	6	6	7.5	106.98	959	39.732	5.9	7.5	164790000	170010000	1.03168
Q9Z2I0	Mitochondrial proton/calcium exchanger protein (Leucine zipper-EF-hand-containing transmembrane protein 1)	Letm1	sp|Q9Z2I0|LETM1_MOUSE Mitochondrial proton/calcium exchanger protein OS=Mus musculus OX=10090 GN=Letm1 PE=1 SV=1	1	6	6	14.1	82.988	738	36.801	0	14.1	0	147500000	#DIV/0!
Q9Z2I8;C6EQH3	Succinate--CoA ligase [GDP-forming] subunit beta, mitochondrial (EC 6.2.1.4) (GTP-specific succinyl-CoA synthetase subunit beta) (G-SCS) (GTPSCS) (Succinyl-CoA synthetase beta-G chain) (SCS-betaG)	Suclg2	sp|Q9Z2I8|SUCB2_MOUSE Succinate--CoA ligase [GDP-forming] subunit beta, mitochondrial OS=Mus musculus OX=10090 GN=Suclg2 PE=1 SV=3;tr|C6EQH3|C6EQH3_MOUSE Succinate--CoA ligase [GDP-forming] subunit beta, mitochondrial OS=Mus musculus OX=10090 GN=Suclg2 PE=	2	6	6	24.9	46.839	433	41.214	5.5	24.9	16591000	189970000	11.4502
A0A0G2JEQ8;A0A0G2JH16;A0A0G2JFV3;A0A0G2JDE3;A0A0G2JG66;A0A0G2JDF4;A0A0G2JFF5;A0A0G2JDK6;A0A0G2JGM8;Q8JZZ7	Adhesion G protein-coupled receptor L2	Adgrl2	tr|A0A0G2JEQ8|A0A0G2JEQ8_MOUSE Adhesion G protein-coupled receptor L2 OS=Mus musculus OX=10090 GN=Adgrl2 PE=1 SV=1;tr|A0A0G2JH16|A0A0G2JH16_MOUSE Adhesion G protein-coupled receptor L2 OS=Mus musculus OX=10090 GN=Adgrl2 PE=1 SV=1;tr|A0A0G2JFV3|A0A0G2JFV3_M	10	5	5	5.3	126.06	1123	40.052	5.3	2.8	143660000	64702000	0.450383
A0A0G2JGX4;Q8VCE0;Q6PIC6;D3YYN7;Q3UHK5;Q6ZQ49;Q6PIE5;Q8R0E8;Q8R0B0;Q8R3A9;Q9WV27;Q91WH7;E9QNX7;Q64436;Q8CGD9	Sodium/potassium-transporting ATPase subunit alpha	Atp1a3	tr|A0A0G2JGX4|A0A0G2JGX4_MOUSE Sodium/potassium-transporting ATPase subunit alpha OS=Mus musculus OX=10090 GN=Atp1a3 PE=1 SV=1;tr|Q8VCE0|Q8VCE0_MOUSE Sodium/potassium-transporting ATPase subunit alpha OS=Mus musculus OX=10090 GN=Atp1a3 PE=1 SV=1;sp|Q6PIC6|	15	19	5	22.5	112.99	1026	42.955	20.4	22.5	98461000	236190000	2.39882
E9Q7W0;Q3UM17;A0A0J9YTV5;P31266;Q3U6F1;A0A0J9YVE0	Recombining-binding protein suppressor of hairless	Rbpj	tr|E9Q7W0|E9Q7W0_MOUSE Recombining-binding protein suppressor of hairless OS=Mus musculus OX=10090 GN=Rbpj PE=1 SV=1;tr|Q3UM17|Q3UM17_MOUSE Uncharacterized protein OS=Mus musculus OX=10090 GN=Rbpj PE=2 SV=1;tr|A0A0J9YTV5|A0A0J9YTV5_MOUSE Recombining-bindin	6	5	5	12.8	54.325	485	36.332	11.1	10.5	118570000	173180000	1.46057
A0A0J9YUI1;Q6ZWQ6;P61087;D3Z4U3;Q3TL77;F8WIC2;A0A0J9YU07;Q3V3R8	Ubiquitin-conjugating enzyme E2 K	Ube2k	tr|A0A0J9YUI1|A0A0J9YUI1_MOUSE Ubiquitin-conjugating enzyme E2 K OS=Mus musculus OX=10090 GN=Ube2k PE=1 SV=1;tr|Q6ZWQ6|Q6ZWQ6_MOUSE E2 ubiquitin-conjugating enzyme OS=Mus musculus OX=10090 GN=Ube2k PE=1 SV=1;sp|P61087|UBE2K_MOUSE Ubiquitin-conjugating enzy	8	5	5	39.6	15.81	139	47.64	39.6	32.4	401200000	123400000	0.307577
A0A0N4SUH4;Q8BKS9;A0A494BBI7;Q7TMX0;A0A494BB98;Q8C0F4	Pumilio homolog 3	Pum3	tr|A0A0N4SUH4|A0A0N4SUH4_MOUSE Pumilio homolog 3 OS=Mus musculus OX=10090 GN=Pum3 PE=1 SV=1;sp|Q8BKS9|PUM3_MOUSE Pumilio homolog 3 OS=Mus musculus OX=10090 GN=Pum3 PE=1 SV=2;tr|A0A494BBI7|A0A494BBI7_MOUSE Pumilio homolog 3 (Fragment) OS=Mus musculus OX=100	6	5	5	9.4	72.93	648	35.487	2.3	9.4	25865000	130130000	5.03112
F6QKD2;A0A0N4SVT1;Q4VBG1;Q9CWX9;A0A0N4SWC5;A0A0N4SVK2;A0A0N4SV55;Q922S6;Q3TEK1	RNA helicase (EC 3.6.4.13) (Fragment)	Ddx47	tr|F6QKD2|F6QKD2_MOUSE RNA helicase (Fragment) OS=Mus musculus OX=10090 GN=Ddx47 PE=1 SV=1;tr|A0A0N4SVT1|A0A0N4SVT1_MOUSE RNA helicase (Fragment) OS=Mus musculus OX=10090 GN=Ddx47 PE=1 SV=1;tr|Q4VBG1|Q4VBG1_MOUSE RNA helicase OS=Mus musculus OX=10090 GN=Dd	9	5	5	16.1	39.913	360	50.75	16.1	13.1	221340000	181300000	0.819102
A0A0R4J046;P53569;A0A3B2WCE8;Q3UGK4	CCAAT/enhancer-binding protein zeta	Cebpz	tr|A0A0R4J046|A0A0R4J046_MOUSE CCAAT/enhancer-binding protein zeta OS=Mus musculus OX=10090 GN=Cebpz PE=1 SV=1;sp|P53569|CEBPZ_MOUSE CCAAT/enhancer-binding protein zeta OS=Mus musculus OX=10090 GN=Cebpz PE=1 SV=2;tr|A0A3B2WCE8|A0A3B2WCE8_MOUSE CCAAT/enhanc	4	5	5	5.3	120.37	1052	37.194	0	5.3	0	109960000	#DIV/0!
A0A0R4J1Y7;E9PXX7;Q3TEE8;Q91W90;Q3UWX1;Q3UBW8	Thioredoxin domain-containing protein 5	Txndc5	tr|A0A0R4J1Y7|A0A0R4J1Y7_MOUSE Thioredoxin domain-containing protein 5 OS=Mus musculus OX=10090 GN=Txndc5 PE=1 SV=1;tr|E9PXX7|E9PXX7_MOUSE Thioredoxin domain-containing protein 5 OS=Mus musculus OX=10090 GN=Txndc5 PE=1 SV=1;tr|Q3TEE8|Q3TEE8_MOUSE Uncharact	6	5	5	24.8	36.083	323	34.663	6.2	24.8	5227500	96517000	18.4633
G3UZI2;A0A0R4J259;G3V018;Q7TMK9;G3UZ48;G3UXJ6;G3UWM1;Q3TRV3;G3XA76;G3UXU5;S4R1E9	Heterogeneous nuclear ribonucleoprotein Q	Syncrip	tr|G3UZI2|G3UZI2_MOUSE Heterogeneous nuclear ribonucleoprotein Q OS=Mus musculus OX=10090 GN=Syncrip PE=1 SV=1;tr|A0A0R4J259|A0A0R4J259_MOUSE Heterogeneous nuclear ribonucleoprotein Q OS=Mus musculus OX=10090 GN=Syncrip PE=1 SV=1;tr|G3V018|G3V018_MOUSE Het	11	8	5	19.4	58.751	527	61.963	13.1	19.4	371620000	595010000	1.60112
Q5EBQ6;A0A140T8T4;P51410;A0A0G2JES3;Q5M9J5;D3Z629;D3YZT0;S4R1R7	60S ribosomal protein L9	Rpl9	tr|Q5EBQ6|Q5EBQ6_MOUSE 60S ribosomal protein L9 OS=Mus musculus OX=10090 GN=Rpl9 PE=1 SV=1;tr|A0A140T8T4|A0A140T8T4_MOUSE 60S ribosomal protein L9 OS=Mus musculus OX=10090 GN=Rpl9-ps6 PE=3 SV=1;sp|P51410|RL9_MOUSE 60S ribosomal protein L9 OS=Mus musculus O	8	5	5	35.9	21.881	192	41.382	21.9	35.9	498430000	1301600000	2.6114
A0A158RFV1;Q9CW46;A0A1L1SRY4	Ribonucleoprotein, PTB-binding 1	Raver1	tr|A0A158RFV1|A0A158RFV1_MOUSE Ribonucleoprotein, PTB-binding 1 OS=Mus musculus OX=10090 GN=Raver1 PE=2 SV=1;sp|Q9CW46|RAVR1_MOUSE Ribonucleoprotein PTB-binding 1 OS=Mus musculus OX=10090 GN=Raver1 PE=1 SV=2;tr|A0A1L1SRY4|A0A1L1SRY4_MOUSE Predicted gene, 3	3	5	5	11.2	79.381	748	36.419	5.3	11.2	49045000	48252000	0.983831
A0A1B0GSX7;Q6PFD9;B7ZN81;B2RQL0;A0A140T8J8;Q4FZE7;Q3TPG3;A0A1B0GRB5;Q3UJE5;A0A1B0GRA7;Q3TP40	Nuclear pore complex protein Nup96 (Nuclear pore complex protein Nup98) (Nuclear pore complex protein Nup98-Nup96) (Nucleoporin Nup96) (Nucleoporin Nup98)	Nup98	tr|A0A1B0GSX7|A0A1B0GSX7_MOUSE Nuclear pore complex protein Nup96 OS=Mus musculus OX=10090 GN=Nup98 PE=1 SV=1;sp|Q6PFD9|NUP98_MOUSE Nuclear pore complex protein Nup98-Nup96 OS=Mus musculus OX=10090 GN=Nup98 PE=1 SV=2;tr|B7ZN81|B7ZN81_MOUSE Nup98 protein OS	11	5	5	3.4	197.31	1816	31.051	0.7	3.4	12089000	78829000	6.52072
A0A1D5RL92;G5E8I8;Q8CGZ0	Calcium homeostasis endoplasmic reticulum protein	Cherp	tr|A0A1D5RL92|A0A1D5RL92_MOUSE Calcium homeostasis endoplasmic reticulum protein OS=Mus musculus OX=10090 GN=Cherp PE=1 SV=1;tr|G5E8I8|G5E8I8_MOUSE Calcium homeostasis endoplasmic reticulum protein OS=Mus musculus OX=10090 GN=Cherp PE=1 SV=2;sp|Q8CGZ0|CHER	3	5	5	6.3	106.41	938	34.59	3	6.3	33417000	164990000	4.93731
A0A1D5RLW5;Q3THJ0;A0A1D5RM85;P62717;A0A1D5RME4;A0A1D5RM79;Q05CK2;A0A1D5RMC7	60S ribosomal protein L18a	Rpl18a	tr|A0A1D5RLW5|A0A1D5RLW5_MOUSE 60S ribosomal protein L18a OS=Mus musculus OX=10090 GN=Rpl18a PE=1 SV=1;tr|Q3THJ0|Q3THJ0_MOUSE 60S ribosomal protein L18a OS=Mus musculus OX=10090 GN=Rpl18a PE=2 SV=1;tr|A0A1D5RM85|A0A1D5RM85_MOUSE 60S ribosomal protein L18a	8	5	5	35.4	17.447	147	31.604	23.8	35.4	222250000	2164500000	9.73903
A0A1D5RMD8;B7ZWL1;B2RXR3;A0A1D5RMJ8;Q6ZQ08;A0A1D5RM03;A0A1D5RML9	CCR4-NOT transcription complex subunit 1	Cnot1	tr|A0A1D5RMD8|A0A1D5RMD8_MOUSE CCR4-NOT transcription complex subunit 1 OS=Mus musculus OX=10090 GN=Cnot1 PE=1 SV=1;tr|B7ZWL1|B7ZWL1_MOUSE CCR4-NOT transcription complex subunit 1 OS=Mus musculus OX=10090 GN=Cnot1 PE=1 SV=1;tr|B2RXR3|B2RXR3_MOUSE Cnot1 pro	7	5	5	4.4	180.25	1614	27.964	2.8	4.4	84082000	100380000	1.19383
A0A1L1SQA8;Q58EA6;P62852	40S ribosomal protein S25	Rps25	tr|A0A1L1SQA8|A0A1L1SQA8_MOUSE 40S ribosomal protein S25 OS=Mus musculus OX=10090 GN=Rps25 PE=1 SV=1;tr|Q58EA6|Q58EA6_MOUSE 40S ribosomal protein S25 OS=Mus musculus OX=10090 GN=Rps25 PE=1 SV=1;sp|P62852|RS25_MOUSE 40S ribosomal protein S25 OS=Mus musculus	3	5	5	39.8	10.309	93	32.667	39.8	39.8	352870000	1747300000	4.95168
A1L0U3;F8WI35;A1L0V4;B9EI85;A0A1W2P768;P84244;P84228;P68433;P02301;E0CZ27;E0CYN1;E0CYR7	Histone H3 (Fragment)	Hist1h3e	tr|A1L0U3|A1L0U3_MOUSE Histone H3 (Fragment) OS=Mus musculus OX=10090 GN=Hist1h3e PE=2 SV=1;tr|F8WI35|F8WI35_MOUSE Histone H3 OS=Mus musculus OX=10090 GN=H3f3a PE=1 SV=1;tr|A1L0V4|A1L0V4_MOUSE Histone H3 (Fragment) OS=Mus musculus OX=10090 GN=Hist1h3i PE=2	12	5	5	25.6	15.029	133	30.229	13.5	25.6	733660000	9394500000	12.805
Q69ZT3;A0A286YCX6;Q6P6J3;Q811K7;Q8BJI6;E9PY51;A0A286YCE0;Q9CU98	MKIAA1012 protein (Fragment)	Trappc8 mKIAA1012	tr|Q69ZT3|Q69ZT3_MOUSE MKIAA1012 protein (Fragment) OS=Mus musculus OX=10090 GN=Trappc8 PE=2 SV=1;tr|A0A286YCX6|A0A286YCX6_MOUSE Trafficking protein particle complex 8 OS=Mus musculus OX=10090 GN=Trappc8 PE=1 SV=2	8	5	5	7	115.52	1033	32.863	4.9	6	45901000	36996000	0.805996
Q3UL43;A0A2R8VHH1;Q80X48;Q6ZQ45;Q99P88;Q8BUA6;Q3USP6	Uncharacterized protein	Nup155	tr|Q3UL43|Q3UL43_MOUSE Uncharacterized protein OS=Mus musculus OX=10090 GN=Nup155 PE=2 SV=1;tr|A0A2R8VHH1|A0A2R8VHH1_MOUSE Nuclear pore complex protein Nup155 OS=Mus musculus OX=10090 GN=Nup155 PE=1 SV=1;tr|Q80X48|Q80X48_MOUSE Nucleoporin 155 OS=Mus muscul	7	5	5	5.8	150.19	1346	44.424	0	5.8	0	149990000	#DIV/0!
A0A2U3TZ56;Q3U263;Q78IQ7	Zinc transporter ZIP4	Slc39a4	tr|A0A2U3TZ56|A0A2U3TZ56_MOUSE Zinc transporter ZIP4 OS=Mus musculus OX=10090 GN=Slc39a4 PE=1 SV=1;tr|Q3U263|Q3U263_MOUSE ZIP4_domain domain-containing protein OS=Mus musculus OX=10090 GN=Slc39a4 PE=2 SV=1;sp|Q78IQ7|S39A4_MOUSE Zinc transporter ZIP4 OS=Mus	3	5	5	11.9	65.167	607	50.444	11.9	11.9	476720000	188170000	0.394718
A0A3B2WCD8;Q3U0V1;Q9R1J3;A0A3B2W465	Far upstream element-binding protein 2	Khsrp	tr|A0A3B2WCD8|A0A3B2WCD8_MOUSE Far upstream element-binding protein 2 OS=Mus musculus OX=10090 GN=Khsrp PE=1 SV=1;sp|Q3U0V1|FUBP2_MOUSE Far upstream element-binding protein 2 OS=Mus musculus OX=10090 GN=Khsrp PE=1 SV=2	4	5	5	8.9	74.252	721	40.033	4.9	8.9	70412000	138030000	1.96032
A0A5F8MPN8;P14152;B1ATQ3	Malate dehydrogenase (EC 1.1.1.37)	Mdh1	tr|A0A5F8MPN8|A0A5F8MPN8_MOUSE Malate dehydrogenase OS=Mus musculus OX=10090 GN=Mdh1 PE=1 SV=1;sp|P14152|MDHC_MOUSE Malate dehydrogenase, cytoplasmic OS=Mus musculus OX=10090 GN=Mdh1 PE=1 SV=3	3	5	5	17.7	38.885	355	43.954	13	17.7	270530000	187240000	0.692123
Q3UZL8;A0PJ97;A0JLN1;E9Q740;F8VQC1;Q3UU23	Uncharacterized protein (Fragment)	Srp72	tr|Q3UZL8|Q3UZL8_MOUSE Uncharacterized protein (Fragment) OS=Mus musculus OX=10090 GN=Srp72 PE=2 SV=1;tr|A0PJ97|A0PJ97_MOUSE Srp72 protein (Fragment) OS=Mus musculus OX=10090 GN=Srp72 PE=2 SV=1;tr|A0JLN1|A0JLN1_MOUSE Srp72 protein (Fragment) OS=Mus musculu	6	5	5	11.4	61.94	553	32.966	2	11.4	18690000	227280000	12.1605
A2A547;Q5I0T8;P84099	Ribosomal protein L19	Rpl19	tr|A2A547|A2A547_MOUSE Ribosomal protein L19 OS=Mus musculus OX=10090 GN=Rpl19 PE=1 SV=1;tr|Q5I0T8|Q5I0T8_MOUSE Ribosomal protein L19 OS=Mus musculus OX=10090 GN=Rpl19 PE=1 SV=1;sp|P84099|RL19_MOUSE 60S ribosomal protein L19 OS=Mus musculus OX=10090 GN=Rpl	3	5	5	18.6	23.247	194	46.623	18	18.6	145740000	2046500000	14.0421
A2AA71;Q3U2P1;A4FUV5;A2AA72;Q8BJ88	Protein transport protein Sec24A	Sec24a	tr|A2AA71|A2AA71_MOUSE Protein transport protein Sec24A OS=Mus musculus OX=10090 GN=Sec24a PE=1 SV=1;sp|Q3U2P1|SC24A_MOUSE Protein transport protein Sec24A OS=Mus musculus OX=10090 GN=Sec24a PE=1 SV=1	5	5	5	6.6	118.65	1089	30.098	6.6	3.5	33847000	13251000	0.391497
I7HLV2;Q3THJ6;A2AM97;Q6ZWV3;P86048;A0A1B0GXC3;B7FAU6	60S ribosomal protein L10 (Ribosomal protein 10) (Fragment)	Rpl10 RP23-436K3.4-003	tr|I7HLV2|I7HLV2_MOUSE 60S ribosomal protein L10 (Fragment) OS=Mus musculus OX=10090 GN=Rpl10 PE=1 SV=1;tr|Q3THJ6|Q3THJ6_MOUSE Ribosomal_L16 domain-containing protein OS=Mus musculus OX=10090 PE=2 SV=1;tr|A2AM97|A2AM97_MOUSE Ribosomal protein 10 OS=Mus mus	7	5	5	21.4	23.072	201	31.615	15.4	21.4	158380000	893010000	5.6384
A2AMV1;A2AMU9;Q9D0I8;Q9QYY3;D6RCI7	Ribosome assembly factor mrt4	Mrto4	tr|A2AMV1|A2AMV1_MOUSE Ribosome assembly factor mrt4 OS=Mus musculus OX=10090 GN=Mrto4 PE=1 SV=1;tr|A2AMU9|A2AMU9_MOUSE Ribosome assembly factor mrt4 OS=Mus musculus OX=10090 GN=Mrto4 PE=1 SV=1;sp|Q9D0I8|MRT4_MOUSE mRNA turnover protein 4 homolog OS=Mus mu	5	5	5	22.3	27.417	238	28.952	14.7	17.6	60052000	238990000	3.97972
A2AUR7;Q9D031;Q01730;Q9CUS2;Q9CSE4;Q3TFN7;B1AYQ0	Ras suppressor protein 1	Rsu1	tr|A2AUR7|A2AUR7_MOUSE Ras suppressor protein 1 OS=Mus musculus OX=10090 GN=Rsu1 PE=1 SV=1;tr|Q9D031|Q9D031_MOUSE Ras suppressor protein 1 OS=Mus musculus OX=10090 GN=Rsu1 PE=1 SV=1;sp|Q01730|RSU1_MOUSE Ras suppressor protein 1 OS=Mus musculus OX=10090 GN=	7	5	5	26.5	29.543	260	30.523	26.5	22.3	72903000	70676000	0.969453
A2RRK3;O54988	Non-specific serine/threonine protein kinase (EC 2.7.11.1)	Slk	tr|A2RRK3|A2RRK3_MOUSE Non-specific serine/threonine protein kinase OS=Mus musculus OX=10090 GN=Slk PE=2 SV=1;sp|O54988|SLK_MOUSE STE20-like serine/threonine-protein kinase OS=Mus musculus OX=10090 GN=Slk PE=1 SV=2	2	5	5	5.9	137.71	1202	36.735	5.9	5.9	75562000	133330000	1.76451
A3KML3;P68254	14-3-3 protein theta	Ywhaq	tr|A3KML3|A3KML3_MOUSE 14-3-3 protein theta OS=Mus musculus OX=10090 GN=Ywhaq PE=2 SV=1;sp|P68254|1433T_MOUSE 14-3-3 protein theta OS=Mus musculus OX=10090 GN=Ywhaq PE=1 SV=1	2	9	5	40	27.778	245	77.55	37.1	39.6	303960000	143880000	0.473352
A8IP69;P61982	14-3-3 protein gamma subtype	Ywhag 14-3-3 gamma	tr|A8IP69|A8IP69_MOUSE 14-3-3 protein gamma subtype OS=Mus musculus OX=10090 GN=Ywhag PE=1 SV=1;sp|P61982|1433G_MOUSE 14-3-3 protein gamma OS=Mus musculus OX=10090 GN=Ywhag PE=1 SV=2	2	10	5	42.9	28.302	247	81.199	36	42.9	538080000	165350000	0.307296
B1AUX2;Q61191;Q3USQ6;F6SJS2	Host cell factor 1	Hcfc1	tr|B1AUX2|B1AUX2_MOUSE Host cell factor 1 OS=Mus musculus OX=10090 GN=Hcfc1 PE=1 SV=1;sp|Q61191|HCFC1_MOUSE Host cell factor 1 OS=Mus musculus OX=10090 GN=Hcfc1 PE=1 SV=2	4	5	5	3.2	215.05	2090	34.938	2.3	2.7	30994000	81106000	2.61683
B1AX98;Q505F5;E9PV22;F6Z4L9	Leucine rich repeat containing 47	Lrrc47	tr|B1AX98|B1AX98_MOUSE Leucine rich repeat containing 47 OS=Mus musculus OX=10090 GN=Lrrc47 PE=1 SV=1;sp|Q505F5|LRC47_MOUSE Leucine-rich repeat-containing protein 47 OS=Mus musculus OX=10090 GN=Lrrc47 PE=1 SV=1;tr|E9PV22|E9PV22_MOUSE Leucine-rich repeat-co	4	5	5	13.6	63.589	581	42.115	13.6	10.3	74432000	32201000	0.432623
B2RXY7;P48758;A0A338P684;A0A1B0GRG8	Carbonyl reductase 1	Cbr1	tr|B2RXY7|B2RXY7_MOUSE Carbonyl reductase 1 OS=Mus musculus OX=10090 GN=Cbr1 PE=1 SV=1;sp|P48758|CBR1_MOUSE Carbonyl reductase [NADPH] 1 OS=Mus musculus OX=10090 GN=Cbr1 PE=1 SV=3	4	5	5	32.1	30.641	277	33.455	32.1	26	98320000	43925000	0.446755
B2RY56;Q8BU35;S4R2B0;S4R2J1;S4R2A4	RNA-binding protein 25 (RNA-binding motif protein 25)	Rbm25	sp|B2RY56|RBM25_MOUSE RNA-binding protein 25 OS=Mus musculus OX=10090 GN=Rbm25 PE=1 SV=2;tr|Q8BU35|Q8BU35_MOUSE PWI domain-containing protein OS=Mus musculus OX=10090 GN=Rbm25 PE=2 SV=1	5	5	5	8.9	99.551	838	35.948	2	8.9	9474000	203640000	21.4946
B9EIE9;P46664;Q8C909	Adenylosuccinate synthetase isozyme 2 (AMPSase 2) (AdSS 2) (EC 6.3.4.4) (Adenylosuccinate synthetase, acidic isozyme) (Adenylosuccinate synthetase, liver isozyme) (L-type adenylosuccinate synthetase) (IMP--aspartate ligase 2)	Adss ADSS ADSS2	tr|B9EIE9|B9EIE9_MOUSE Adenylosuccinate synthetase isozyme 2 OS=Mus musculus OX=10090 GN=Adss PE=1 SV=1;sp|P46664|PURA2_MOUSE Adenylosuccinate synthetase isozyme 2 OS=Mus musculus OX=10090 GN=Adss2 PE=1 SV=2	3	5	5	15.4	50.02	456	42.579	15.4	10.1	106920000	15893000	0.148644
D3YZ09;Q3TKG5;Q9CY66;F6SL78	H/ACA ribonucleoprotein complex subunit (Fragment)	Gar1	tr|D3YZ09|D3YZ09_MOUSE H/ACA ribonucleoprotein complex subunit (Fragment) OS=Mus musculus OX=10090 GN=Gar1 PE=1 SV=1;tr|Q3TKG5|Q3TKG5_MOUSE H/ACA ribonucleoprotein complex subunit OS=Mus musculus OX=10090 GN=Gar1 PE=2 SV=1;sp|Q9CY66|GAR1_MOUSE H/ACA ribonu	4	5	5	32.8	20.448	198	32.223	13.6	32.8	22784000	196360000	8.61833
E9PUD2;Q8K1M6;A0A2U3TZ67;Q3U4P3	Dynamin-1-like protein (EC 3.6.5.5)	Dnm1l	tr|E9PUD2|E9PUD2_MOUSE Dynamin-1-like protein OS=Mus musculus OX=10090 GN=Dnm1l PE=1 SV=1;sp|Q8K1M6|DNM1L_MOUSE Dynamin-1-like protein OS=Mus musculus OX=10090 GN=Dnm1l PE=1 SV=2;tr|A0A2U3TZ67|A0A2U3TZ67_MOUSE Dynamin-1-like protein OS=Mus musculus OX=1009	4	5	5	8.8	79.532	712	34.517	8.8	8.8	73986000	31084000	0.420134
Q6KAM6;E9PUF7;Q61210;A0A0U1RPP2;A0A0U1RPN7;A0A0U1RPH2;F6ZN61	MFLJ00369 protein (Fragment)	Arhgef1 mFLJ00369	tr|Q6KAM6|Q6KAM6_MOUSE MFLJ00369 protein (Fragment) OS=Mus musculus OX=10090 GN=Arhgef1 PE=2 SV=1;tr|E9PUF7|E9PUF7_MOUSE Rho guanine nucleotide exchange factor 1 OS=Mus musculus OX=10090 GN=Arhgef1 PE=1 SV=1;sp|Q61210|ARHG1_MOUSE Rho guanine nucleotide exc	7	5	5	7	104.63	939	37.132	3	5.4	66487000	91063000	1.36964
E9Q5H2;E9PZF5;P97822;E9Q0X5	Acidic leucine-rich nuclear phosphoprotein 32 family member E (Fragment)	Anp32e	tr|E9Q5H2|E9Q5H2_MOUSE Acidic leucine-rich nuclear phosphoprotein 32 family member E (Fragment) OS=Mus musculus OX=10090 GN=Anp32e PE=1 SV=1;tr|E9PZF5|E9PZF5_MOUSE Acidic leucine-rich nuclear phosphoprotein 32 family member E (Fragment) OS=Mus musculus OX=	4	5	5	57.9	12.078	107	75.137	57.9	57.9	132170000	774790000	5.86207
Q8C2G0;E9Q2A6;Q3UDE9;K7QD41;Q9QVP9;F7CCX1;Q8C6R5;Q8C9L4;K7Q751;A0A5F8MPY3;P34152	Non-specific protein-tyrosine kinase (EC 2.7.10.2)	Ptk2b	tr|Q8C2G0|Q8C2G0_MOUSE Non-specific protein-tyrosine kinase OS=Mus musculus OX=10090 GN=Ptk2b PE=2 SV=1;tr|E9Q2A6|E9Q2A6_MOUSE Non-specific protein-tyrosine kinase OS=Mus musculus OX=10090 GN=Ptk2b PE=1 SV=1;tr|Q3UDE9|Q3UDE9_MOUSE Non-specific protein-tyro	11	5	5	8.1	111.13	967	33.01	6.6	6.3	18744000	55612000	2.96692
E9Q3V6;P42208;F6UKN5;D3Z1S1;F6WYM0;D3YYB1;D3Z3C0;D3YZU7;D3YV76	Septin-2	Septin2 Sept2	tr|E9Q3V6|E9Q3V6_MOUSE Septin-2 OS=Mus musculus OX=10090 GN=Septin2 PE=1 SV=1;sp|P42208|SEPT2_MOUSE Septin-2 OS=Mus musculus OX=10090 GN=Septin2 PE=1 SV=2;tr|F6UKN5|F6UKN5_MOUSE Septin-2 (Fragment) OS=Mus musculus OX=10090 GN=Septin2 PE=1 SV=2;tr|D3Z1S1|D3	9	5	5	24.9	36.978	321	61.32	24.9	19	157660000	60547000	0.384035
Q80TU6;F6RJ39;Q9JIX8;Q52KR6;B8JJ92;Q7TSL7;B8JJ91;Q05D19;Q3UXT9;F6Q8C0;B8JJ90	MKIAA0670 protein (Fragment)	Acin1 mKIAA0670	tr|Q80TU6|Q80TU6_MOUSE MKIAA0670 protein (Fragment) OS=Mus musculus OX=10090 GN=Acin1 PE=2 SV=1;tr|F6RJ39|F6RJ39_MOUSE Apoptotic chromatin condensation inducer in the nucleus (Fragment) OS=Mus musculus OX=10090 GN=Acin1 PE=1 SV=1;sp|Q9JIX8|ACINU_MOUSE Apop	11	5	5	6	142.85	1266	51.415	0	6	0	128980000	#DIV/0!
F6Y6L6;Q3TWL1;Q3U7I9;F8WIR1;Q3UCD9;Q3UAQ1;Q3U7P0;Q3U651;Q3TXL5;Q3TWR6;Q3TWD0;Q3TJN3;Q8C243;P18242;Q8VCK2;A0A1B0GT66;Q3UC89;Q3U8W5;Q3UCW4;Q3TIR0;Q05BF3	Predicted gene, 49369 (Fragment)	Gm49369	tr|F6Y6L6|F6Y6L6_MOUSE Predicted gene, 49369 (Fragment) OS=Mus musculus OX=10090 GN=Gm49369 PE=1 SV=1;tr|Q3TWL1|Q3TWL1_MOUSE Cathepsin D (Fragment) OS=Mus musculus OX=10090 GN=Ctsd PE=2 SV=1;tr|Q3U7I9|Q3U7I9_MOUSE Cathepsin D OS=Mus musculus OX=10090 GN=Ct	21	5	5	22.3	29.842	278	35.57	14.4	22.3	83796000	756560000	9.02859
F8VPL2;Q61194;A0A0U1RNT0;A0A0U1RNH9;Q3US21;Q3UQN0	Phosphatidylinositol-4-phosphate 3-kinase (EC 2.7.1.154)	Pik3c2a	tr|F8VPL2|F8VPL2_MOUSE Phosphatidylinositol-4-phosphate 3-kinase OS=Mus musculus OX=10090 GN=Pik3c2a PE=1 SV=1;sp|Q61194|P3C2A_MOUSE Phosphatidylinositol 4-phosphate 3-kinase C2 domain-containing subunit alpha OS=Mus musculus OX=10090 GN=Pik3c2a PE=1 SV=2;	6	5	5	4	190.74	1686	38.999	3.3	2.6	93475000	53151000	0.568612
G8JL74;G3UXA6;Q8BHD7;G3UZ01;F7C521;G3UXZ8;Q8C5Q1	Polypyrimidine tract-binding protein 3	Ptbp3 Rod1	tr|G8JL74|G8JL74_MOUSE Polypyrimidine tract-binding protein 3 OS=Mus musculus OX=10090 GN=Ptbp3 PE=1 SV=1;tr|G3UXA6|G3UXA6_MOUSE Polypyrimidine tract-binding protein 3 OS=Mus musculus OX=10090 GN=Ptbp3 PE=1 SV=1;sp|Q8BHD7|PTBP3_MOUSE Polypyrimidine tract-b	7	6	5	10.5	59.465	551	30.907	5.4	10.5	3389100	152860000	45.1034
G3UXT7;Q8CFQ9;Q564D0;Q3USY4;Q3UK30;P56959;F6QCI0;Q3TLE4;Q8BQ46;G3UZD2;Q91VQ2	RNA-binding protein FUS (Fragment)	Fus	tr|G3UXT7|G3UXT7_MOUSE RNA-binding protein FUS (Fragment) OS=Mus musculus OX=10090 GN=Fus PE=1 SV=1;tr|Q8CFQ9|Q8CFQ9_MOUSE Fusion, derived from t(1216) malignant liposarcoma (Human) OS=Mus musculus OX=10090 GN=Fus PE=1 SV=1;tr|Q564D0|Q564D0_MOUSE Pigpen pr	11	5	5	39.2	13.897	130	34.889	28.5	39.2	89276000	257360000	2.88275
O35435;Q8BMJ0;E9Q1V3;Q3UET5;F6TCT7	Dihydroorotate dehydrogenase (quinone), mitochondrial (DHOdehase) (EC 1.3.5.2) (Dihydroorotate oxidase)	Dhodh	sp|O35435|PYRD_MOUSE Dihydroorotate dehydrogenase (quinone), mitochondrial OS=Mus musculus OX=10090 GN=Dhodh PE=1 SV=2;tr|Q8BMJ0|Q8BMJ0_MOUSE Dihydroorotate dehydrogenase (quinone), mitochondrial OS=Mus musculus OX=10090 GN=Dhodh PE=2 SV=1;tr|E9Q1V3|E9Q1V3	5	5	5	16.2	42.699	395	34.061	0	16.2	0	137810000	#DIV/0!
O35685	Nuclear migration protein nudC (Nuclear distribution protein C homolog) (Silica-induced gene 92 protein) (SIG-92)	Nudc	sp|O35685|NUDC_MOUSE Nuclear migration protein nudC OS=Mus musculus OX=10090 GN=Nudc PE=1 SV=1	1	5	5	16.6	38.358	332	34.856	16.6	16.6	198360000	117680000	0.593265
Q3UYQ4;O35841	Uncharacterized protein	Api5	tr|Q3UYQ4|Q3UYQ4_MOUSE Uncharacterized protein OS=Mus musculus OX=10090 GN=Api5 PE=2 SV=1;sp|O35841|API5_MOUSE Apoptosis inhibitor 5 OS=Mus musculus OX=10090 GN=Api5 PE=1 SV=2	2	5	5	9.4	59.046	524	36.566	9.4	7.8	174490000	209980000	1.20339
Q8BQV7;Q6ZWX1;O55142;Q9DC85	60S ribosomal protein L35a	Rpl35a	tr|Q8BQV7|Q8BQV7_MOUSE 60S ribosomal protein L35a OS=Mus musculus OX=10090 GN=Rpl35a PE=2 SV=1;tr|Q6ZWX1|Q6ZWX1_MOUSE 60S ribosomal protein L35a OS=Mus musculus OX=10090 GN=Rpl35a PE=1 SV=1;sp|O55142|RL35A_MOUSE 60S ribosomal protein L35a OS=Mus musculus O	4	5	5	38.2	12.563	110	30.099	38.2	38.2	555140000	983060000	1.77083
O55201;A0A140LJ34	Transcription elongation factor SPT5 (DRB sensitivity-inducing factor large subunit) (DSIF large subunit)	Supt5h Supt5	sp|O55201|SPT5H_MOUSE Transcription elongation factor SPT5 OS=Mus musculus OX=10090 GN=Supt5h PE=1 SV=1	2	5	5	7.2	120.66	1082	32.348	4.3	5.5	60481000	101330000	1.6754
Q9CU14;Q9CSC2;Q78ZM0;O70492;D3Z789;D3Z6Z0	PX domain-containing protein (Fragment)	Snx3	tr|Q9CU14|Q9CU14_MOUSE PX domain-containing protein (Fragment) OS=Mus musculus OX=10090 GN=Snx3 PE=2 SV=1;tr|Q9CSC2|Q9CSC2_MOUSE PX domain-containing protein (Fragment) OS=Mus musculus OX=10090 GN=Snx3 PE=2 SV=1;tr|Q78ZM0|Q78ZM0_MOUSE Sorting nexin-3 OS=Mu	6	5	5	37.1	15.417	132	32.086	25.8	37.1	39799000	166230000	4.17674
O70569;P62264;D3YVF4;D3Z7I1;Q3UJS5	Ribosomal protein S14	rps14	tr|O70569|O70569_MOUSE Ribosomal protein S14 OS=Mus musculus OX=10090 GN=rps14 PE=3 SV=1;sp|P62264|RS14_MOUSE 40S ribosomal protein S14 OS=Mus musculus OX=10090 GN=Rps14 PE=1 SV=3;tr|D3YVF4|D3YVF4_MOUSE 40S ribosomal protein S14 (Fragment) OS=Mus musculus	5	5	5	36.4	16.301	151	46.425	36.4	36.4	367430000	1413900000	3.84808
Q99KF5;P00493;A0A0H3YJA6	Hypoxanthine phosphoribosyltransferase (EC 2.4.2.8)	Hprt Hprt1	tr|Q99KF5|Q99KF5_MOUSE Hypoxanthine phosphoribosyltransferase OS=Mus musculus OX=10090 GN=Hprt PE=2 SV=1;sp|P00493|HPRT_MOUSE Hypoxanthine-guanine phosphoribosyltransferase OS=Mus musculus OX=10090 GN=Hprt1 PE=1 SV=3	3	5	5	28	24.544	218	37.949	28	23.4	212660000	107350000	0.504796
Q8C1Y3;Q3U4Y0;P10922	H15 domain-containing protein	H1f0	tr|Q8C1Y3|Q8C1Y3_MOUSE H15 domain-containing protein OS=Mus musculus OX=10090 GN=H1f0 PE=2 SV=1;tr|Q3U4Y0|Q3U4Y0_MOUSE H15 domain-containing protein OS=Mus musculus OX=10090 GN=H1f0 PE=2 SV=1;sp|P10922|H10_MOUSE Histone H1.0 OS=Mus musculus OX=10090 GN=H1-	3	5	5	24.6	19.253	179	37.644	0	24.6	0	1813700000	#DIV/0!
Q8VH34;Q3TX84;Q3TA96;Q9DC13;P11438;Q922T9	LAMP-1	Lamp1	tr|Q8VH34|Q8VH34_MOUSE LAMP-1 OS=Mus musculus OX=10090 GN=Lamp1 PE=2 SV=1;tr|Q3TX84|Q3TX84_MOUSE Uncharacterized protein OS=Mus musculus OX=10090 GN=Lamp1 PE=2 SV=1;tr|Q3TA96|Q3TA96_MOUSE Uncharacterized protein OS=Mus musculus OX=10090 GN=Lamp1 PE=1 SV=1;	6	5	5	13.8	43.879	406	43.166	7.4	13.8	617630000	1843400000	2.98463
Q8C5M4;P12815;Q3UGE5	Uncharacterized protein	Pdcd6	tr|Q8C5M4|Q8C5M4_MOUSE Uncharacterized protein OS=Mus musculus OX=10090 GN=Pdcd6 PE=2 SV=1;sp|P12815|PDCD6_MOUSE Programmed cell death protein 6 OS=Mus musculus OX=10090 GN=Pdcd6 PE=1 SV=2;tr|Q3UGE5|Q3UGE5_MOUSE Uncharacterized protein OS=Mus musculus OX=1	3	5	5	35.6	21.853	191	37.075	35.6	35.6	446390000	354460000	0.794059
P16045;A0A2R8VHJ0	Galectin-1 (Gal-1) (14 kDa lectin) (Beta-galactoside-binding lectin L-14-I) (Galaptin) (Lactose-binding lectin 1) (Lectin galactoside-binding soluble 1) (S-Lac lectin 1)	Lgals1 Gbp	sp|P16045|LEG1_MOUSE Galectin-1 OS=Mus musculus OX=10090 GN=Lgals1 PE=1 SV=3	2	5	5	45.2	14.866	135	42.963	39.3	45.2	386950000	591880000	1.5296
Q9CZU7;Q8C876;Q3UIW3;Q3TWE1;Q8C5K0;P17047	Uncharacterized protein	Lamp2	tr|Q9CZU7|Q9CZU7_MOUSE Uncharacterized protein OS=Mus musculus OX=10090 GN=Lamp2 PE=2 SV=1;tr|Q8C876|Q8C876_MOUSE Uncharacterized protein OS=Mus musculus OX=10090 GN=Lamp2 PE=2 SV=1;tr|Q3UIW3|Q3UIW3_MOUSE Uncharacterized protein OS=Mus musculus OX=10090 GN	6	5	5	12	45.673	415	32.018	9.6	12	411050000	1776900000	4.32283
P17439;A0A0G2JDK2	Lysosomal acid glucosylceramidase (Lysosomal acid GCase) (EC 3.2.1.45) (Acid beta-glucosidase) (Beta-glucocerebrosidase) (Cholesterol glucosyltransferase) (SGTase) (EC 2.4.1.-) (Cholesteryl-beta-glucosidase) (EC 3.2.1.-) (D-glucosyl-N-acylsphingosine glucohydrolase)	Gba	sp|P17439|GLCM_MOUSE Lysosomal acid glucosylceramidase OS=Mus musculus OX=10090 GN=Gba PE=1 SV=1;tr|A0A0G2JDK2|A0A0G2JDK2_MOUSE Glucosylceramidase OS=Mus musculus OX=10090 GN=Gba PE=1 SV=1	2	5	5	10.7	57.621	515	31.279	10.7	10.7	147990000	317950000	2.14846
P20108;Q8K4K8	Thioredoxin-dependent peroxide reductase, mitochondrial (EC 1.11.1.24) (Antioxidant protein 1) (AOP-1) (PRX III) (Perioredoxin-3) (Protein MER5) (Thioredoxin-dependent peroxiredoxin 3)	Prdx3 Aop1 Mer5	sp|P20108|PRDX3_MOUSE Thioredoxin-dependent peroxide reductase, mitochondrial OS=Mus musculus OX=10090 GN=Prdx3 PE=1 SV=1;tr|Q8K4K8|Q8K4K8_MOUSE Antioxidant protein OS=Mus musculus OX=10090 PE=4 SV=1	2	5	5	20.2	28.127	257	35.008	17.5	20.2	71281000	178570000	2.50516
Q8CEI0;Q3U6Q5;Q3TCS3;P25911;Q05DV0	Tyrosine-protein kinase (EC 2.7.10.2)	Lyn	tr|Q8CEI0|Q8CEI0_MOUSE Tyrosine-protein kinase OS=Mus musculus OX=10090 GN=Lyn PE=2 SV=1;tr|Q3U6Q5|Q3U6Q5_MOUSE Tyrosine-protein kinase OS=Mus musculus OX=10090 GN=Lyn PE=2 SV=1;tr|Q3TCS3|Q3TCS3_MOUSE Tyrosine-protein kinase OS=Mus musculus OX=10090 GN=Lyn	5	5	5	15.3	56.309	491	29.894	15.3	12.6	94845000	62380000	0.657705
Q3U6E4;Q0VGU2;P26350;Q8C2T3;Q3U8X6;Q3UA54;A0A087WP98;A0A087WPN6;A0A087WQN2;Q8CAQ5	Uncharacterized protein	Ptma	tr|Q3U6E4|Q3U6E4_MOUSE Uncharacterized protein OS=Mus musculus OX=10090 GN=Ptma PE=2 SV=1;tr|Q0VGU2|Q0VGU2_MOUSE Prothymosin alpha OS=Mus musculus OX=10090 GN=Ptma PE=1 SV=1;sp|P26350|PTMA_MOUSE Prothymosin alpha OS=Mus musculus OX=10090 GN=Ptma PE=1 SV=2;	10	5	5	36	12.325	111	43.614	36	21.6	157590000	61215000	0.388445
Q6P5I3;P28474;A0A0G2JGS3;Q9D748;Q548K2;Q3UMM7;Q64437	S-(hydroxymethyl)glutathione dehydrogenase (EC 1.1.1.284)	Adh5	tr|Q6P5I3|Q6P5I3_MOUSE S-(hydroxymethyl)glutathione dehydrogenase OS=Mus musculus OX=10090 GN=Adh5 PE=1 SV=2;sp|P28474|ADHX_MOUSE Alcohol dehydrogenase class-3 OS=Mus musculus OX=10090 GN=Adh5 PE=1 SV=3	7	5	5	19	39.547	374	38.117	19	16.6	350970000	211540000	0.60273
Q0PD54;P35279;Q3U4W5;D3YV69;Q0PD53;P61294;A0A1L1SRS6;Q0PD15;Q8BHD0	Rab6A	Rab6a Rab6 Rab6A	tr|Q0PD54|Q0PD54_MOUSE Rab6A OS=Mus musculus OX=10090 GN=Rab6a PE=2 SV=1;sp|P35279|RAB6A_MOUSE Ras-related protein Rab-6A OS=Mus musculus OX=10090 GN=Rab6a PE=1 SV=4;tr|Q3U4W5|Q3U4W5_MOUSE Uncharacterized protein OS=Mus musculus OX=10090 GN=Rab6a PE=2 SV=1	9	5	5	32.7	23.59	208	38.6	16.3	32.7	461610000	1128800000	2.44535
Q3UJS2;P35550;A0A140LIR6	Uncharacterized protein	Fbl	tr|Q3UJS2|Q3UJS2_MOUSE Uncharacterized protein OS=Mus musculus OX=10090 GN=Fbl PE=2 SV=1;sp|P35550|FBRL_MOUSE rRNA 2-O-methyltransferase fibrillarin OS=Mus musculus OX=10090 GN=Fbl PE=1 SV=2;tr|A0A140LIR6|A0A140LIR6_MOUSE rRNA 2-O-methyltransferase fibri	3	6	5	22.9	34.375	327	48.055	22.9	22.9	189540000	891500000	4.70349
Q642K1;Q58EW0;P35980;A0A1B0GSS8;A0A1B0GQU8;Q0QEW9;A0A1B0GSA8;A0A1B0GSF7;A0A1B0GRZ3;A0A1B0GS28	Ribosomal protein L18	Rpl18	tr|Q642K1|Q642K1_MOUSE Ribosomal protein L18 OS=Mus musculus OX=10090 GN=Rpl18 PE=2 SV=1;tr|Q58EW0|Q58EW0_MOUSE Rpl18 protein OS=Mus musculus OX=10090 GN=Rpl18 PE=1 SV=1;sp|P35980|RL18_MOUSE 60S ribosomal protein L18 OS=Mus musculus OX=10090 GN=Rpl18 PE=1	10	5	5	28.2	21.643	188	50.68	10.6	28.2	317590000	3565900000	11.228
Q8R055;Q3U4X8;P37913;Q3TSU8;E9PV36;V9GWZ4	DNA ligase (EC 6.5.1.1)	Lig1	tr|Q8R055|Q8R055_MOUSE DNA ligase OS=Mus musculus OX=10090 GN=Lig1 PE=2 SV=1;tr|Q3U4X8|Q3U4X8_MOUSE DNA ligase OS=Mus musculus OX=10090 GN=Lig1 PE=1 SV=1;sp|P37913|DNLI1_MOUSE DNA ligase 1 OS=Mus musculus OX=10090 GN=Lig1 PE=1 SV=2;tr|Q3TSU8|Q3TSU8_MOUSE D	6	5	5	7.6	102.25	916	41.556	1.5	7.6	3928500	185310000	47.1707
P40240	CD9 antigen (CD antigen CD9)	Cd9	sp|P40240|CD9_MOUSE CD9 antigen OS=Mus musculus OX=10090 GN=Cd9 PE=1 SV=2	1	5	5	26.5	25.258	226	46.912	26.5	26.1	2910300000	380660000	0.130798
Q5M9N5;Q5M9J8;P41105;F6Z0X0	60S ribosomal protein L28	Rpl28	tr|Q5M9N5|Q5M9N5_MOUSE 60S ribosomal protein L28 OS=Mus musculus OX=10090 GN=Rpl28 PE=2 SV=1;tr|Q5M9J8|Q5M9J8_MOUSE 60S ribosomal protein L28 OS=Mus musculus OX=10090 GN=Rpl28 PE=1 SV=1;sp|P41105|RL28_MOUSE 60S ribosomal protein L28 OS=Mus musculus OX=1009	4	5	5	34.3	15.709	137	33.761	21.2	34.3	141630000	1088800000	7.68764
Q3TKR5;Q58EU6;Q3U850;P47962;Q3THE1;D3YYV8	Ribosomal protein L5	Rpl5	tr|Q3TKR5|Q3TKR5_MOUSE Ribosomal protein L5 OS=Mus musculus OX=10090 GN=Rpl5 PE=2 SV=1;tr|Q58EU6|Q58EU6_MOUSE Ribosomal protein L5 OS=Mus musculus OX=10090 GN=Rpl5 PE=1 SV=1;tr|Q3U850|Q3U850_MOUSE Ribosomal_L18_c domain-containing protein OS=Mus musculus O	6	5	5	20.6	34.269	296	31.856	20.6	11.5	632740000	144990000	0.229146
P47963;Q5RKP3	60S ribosomal protein L13 (A52)	Rpl13	sp|P47963|RL13_MOUSE 60S ribosomal protein L13 OS=Mus musculus OX=10090 GN=Rpl13 PE=1 SV=3;tr|Q5RKP3|Q5RKP3_MOUSE 60S ribosomal protein L13 OS=Mus musculus OX=10090 GN=Rpl13 PE=2 SV=1	2	5	5	23.2	24.305	211	35.876	3.8	23.2	43639000	2061800000	47.2467
P48962;Q8BVI9;B2RTC8;Q3V132	ADP/ATP translocase 1 (ADP,ATP carrier protein 1) (ADP,ATP carrier protein, heart/skeletal muscle isoform T1) (Adenine nucleotide translocator 1) (ANT 1) (Solute carrier family 25 member 4)	Slc25a4 Aac1 Anc1 Ant1	sp|P48962|ADT1_MOUSE ADP/ATP translocase 1 OS=Mus musculus OX=10090 GN=Slc25a4 PE=1 SV=4;tr|Q8BVI9|Q8BVI9_MOUSE ADP/ATP translocase OS=Mus musculus OX=10090 GN=Slc25a4 PE=2 SV=1	4	7	5	22.8	32.904	298	46.504	2.7	22.8	0	787270000	#DIV/0!
P60335;A0A087WR61;A0A087WSI1;A0A1L1SUS5;A0A1L1SRP9;A0A1L1SQ99;A0A087WRH3;Q9DB01;Q8BP63;A0A0R4J044;P57724	Poly(rC)-binding protein 1 (Alpha-CP1) (Heterogeneous nuclear ribonucleoprotein E1) (hnRNP E1)	Pcbp1	sp|P60335|PCBP1_MOUSE Poly(rC)-binding protein 1 OS=Mus musculus OX=10090 GN=Pcbp1 PE=1 SV=1	11	8	5	28.7	37.497	356	45.628	28.7	28.7	514820000	1041100000	2.02226
Q921R2;Q5BLJ7;P62301;A0A0U1RQ71	40S ribosomal protein S13	Rps13	tr|Q921R2|Q921R2_MOUSE 40S ribosomal protein S13 OS=Mus musculus OX=10090 GN=Rps13 PE=1 SV=1;tr|Q5BLJ7|Q5BLJ7_MOUSE 40S ribosomal protein S13 OS=Mus musculus OX=10090 GN=Rps13 PE=1 SV=1;sp|P62301|RS13_MOUSE 40S ribosomal protein S13 OS=Mus musculus OX=1009	4	5	5	37.9	16.142	140	50.676	31.4	37.9	487570000	1108600000	2.27372
Q3UNY0;Q3ULN2;P62915;Q3UZJ3	General transcription factor TFIIB (EC 2.3.1.48) (Transcription initiation factor IIB)	Gtf2b	tr|Q3UNY0|Q3UNY0_MOUSE General transcription factor TFIIB OS=Mus musculus OX=10090 GN=Gtf2b PE=2 SV=1;tr|Q3ULN2|Q3ULN2_MOUSE General transcription factor TFIIB OS=Mus musculus OX=10090 GN=Gtf2b PE=1 SV=1;sp|P62915|TF2B_MOUSE Transcription initiation factor	4	5	5	21.8	34.862	316	32.412	9.5	21.8	24953000	98899000	3.96341
Q3UJS0;P62918;Q3THC7;Q9Z237	60S ribosomal protein L8	Rpl8	tr|Q3UJS0|Q3UJS0_MOUSE 60S ribosomal protein L8 OS=Mus musculus OX=10090 GN=Rpl8 PE=2 SV=1;sp|P62918|RL8_MOUSE 60S ribosomal protein L8 OS=Mus musculus OX=10090 GN=Rpl8 PE=1 SV=2;tr|Q3THC7|Q3THC7_MOUSE 60S ribosomal protein L8 OS=Mus musculus OX=10090 GN=R	4	5	5	27.6	28.066	257	46.533	27.6	27.6	139180000	2924300000	21.0109
P63094;Q6R0H7;A0A571BEI3;Z4YKV1;A0A571BEM2;A0A571BE25;A2A610;A0A571BEG2;A0A571BGH5	Guanine nucleotide-binding protein G(s) subunit alpha isoforms short (Adenylate cyclase-stimulating G alpha protein)	Gnas Gnas1 MNCb-5546	sp|P63094|GNAS2_MOUSE Guanine nucleotide-binding protein G(s) subunit alpha isoforms short OS=Mus musculus OX=10090 GN=Gnas PE=1 SV=1;sp|Q6R0H7|GNAS1_MOUSE Guanine nucleotide-binding protein G(s) subunit alpha isoforms XLas OS=Mus musculus OX=10090 GN=Gnas	9	6	5	20.1	45.663	394	41.515	20.1	20.1	407460000	306120000	0.751288
Q5EBQ2;Q3TGC5;P70296;D3Z1V4;D6RHS6	Phosphatidylethanolamine binding protein 1	Pebp1 Pbp Pbp1	tr|Q5EBQ2|Q5EBQ2_MOUSE Phosphatidylethanolamine binding protein 1 OS=Mus musculus OX=10090 GN=Pebp1 PE=1 SV=1;tr|Q3TGC5|Q3TGC5_MOUSE Uncharacterized protein OS=Mus musculus OX=10090 GN=Pebp1 PE=2 SV=1;sp|P70296|PEBP1_MOUSE Phosphatidylethanolamine-binding	5	5	5	46	20.83	187	40.079	46	32.1	233290000	122850000	0.526598
Q00PI9;Q8BIQ7;Q8BIY6	Heterogeneous nuclear ribonucleoprotein U-like protein 2 (MLF1-associated nuclear protein)	Hnrnpul2 Hnrpul2 Manp	sp|Q00PI9|HNRL2_MOUSE Heterogeneous nuclear ribonucleoprotein U-like protein 2 OS=Mus musculus OX=10090 GN=Hnrnpul2 PE=1 SV=2	3	5	5	10.2	84.939	745	53.03	3	10.2	10763000	210000000	19.5113
Q05D44;Q8BYY7;Q7TPC0;Q6A002	Eukaryotic translation initiation factor 5B (eIF-5B) (EC 3.6.5.3) (Translation initiation factor IF-2)	Eif5b If2	sp|Q05D44|IF2P_MOUSE Eukaryotic translation initiation factor 5B OS=Mus musculus OX=10090 GN=Eif5b PE=1 SV=2	4	5	5	5.9	137.61	1216	35.857	3	2.9	0	66512000	#DIV/0!
Q3TGI9;Q3TAJ5;Q3TS64;Q3TH37;Q3UL54;Q1PG84;Q8BVY0;Q3TN25;Q3TLJ3;Q9CSF9;A0A2R8VHW2	Uncharacterized protein	Rsl1d1	tr|Q3TGI9|Q3TGI9_MOUSE Uncharacterized protein OS=Mus musculus OX=10090 GN=Rsl1d1 PE=2 SV=1;tr|Q3TAJ5|Q3TAJ5_MOUSE Uncharacterized protein OS=Mus musculus OX=10090 GN=Rsl1d1 PE=2 SV=1;tr|Q3TS64|Q3TS64_MOUSE Uncharacterized protein OS=Mus musculus OX=10090	11	5	5	24.1	43.363	386	43.042	2.8	24.1	12683000	358690000	28.2812
Q3KQQ1;Q3UVN5;Q9CZ44;A2AT02	NSFL1 cofactor p47 (p97 cofactor p47) (Fragment)	Nsfl1c	tr|Q3KQQ1|Q3KQQ1_MOUSE NSFL1 cofactor p47 (Fragment) OS=Mus musculus OX=10090 GN=Nsfl1c PE=2 SV=1;tr|Q3UVN5|Q3UVN5_MOUSE NSFL1 cofactor p47 OS=Mus musculus OX=10090 GN=Nsfl1c PE=2 SV=1;sp|Q9CZ44|NSF1C_MOUSE NSFL1 cofactor p47 OS=Mus musculus OX=10090 GN=Ns	4	5	5	16	40.594	369	35.603	16	16	111510000	92092000	0.825863
Q3TF25;Q9DB20;Q3THG0;A0A338P776;F6XVM5;A0A338P7G3;F7D3P8	ATP synthase peripheral stalk subunit OSCP (ATP synthase subunit O, mitochondrial) (Oligomycin sensitivity conferral protein)	Atp5o	tr|Q3TF25|Q3TF25_MOUSE ATP synthase peripheral stalk subunit OSCP OS=Mus musculus OX=10090 GN=Atp5o PE=2 SV=1;sp|Q9DB20|ATPO_MOUSE ATP synthase subunit O, mitochondrial OS=Mus musculus OX=10090 GN=Atp5po PE=1 SV=1;tr|Q3THG0|Q3THG0_MOUSE ATP synthase periph	7	5	5	31.9	23.364	213	36.705	10.3	31.9	3403900	603870000	177.405
Q544H0;Q3THA0;Q9Z1D1	Eukaryotic translation initiation factor 3 subunit G (eIF3g) (Eukaryotic translation initiation factor 3 RNA-binding subunit) (eIF-3 RNA-binding subunit) (Eukaryotic translation initiation factor 3 subunit 4) (eIF-3-delta) (eIF3 p42) (eIF3 p44)	Eif3g EIF3G EIF3S4 Eif3s4	tr|Q544H0|Q544H0_MOUSE Eukaryotic translation initiation factor 3 subunit G OS=Mus musculus OX=10090 GN=Eif3g PE=1 SV=1;tr|Q3THA0|Q3THA0_MOUSE Eukaryotic translation initiation factor 3 subunit G OS=Mus musculus OX=10090 GN=Eif3g PE=2 SV=1;sp|Q9Z1D1|EIF3G_	3	5	5	19.4	35.638	320	43.796	19.4	19.4	141060000	196150000	1.39054
Q4KMM5;Q3UZG0;Q3TIZ8;Q91XA2	Golgi membrane protein 1	Golm1 Golph2	tr|Q4KMM5|Q4KMM5_MOUSE Golgi membrane protein 1 OS=Mus musculus OX=10090 GN=Golm1 PE=2 SV=1;tr|Q3UZG0|Q3UZG0_MOUSE Uncharacterized protein OS=Mus musculus OX=10090 GN=Golm1 PE=2 SV=1;tr|Q3TIZ8|Q3TIZ8_MOUSE Uncharacterized protein OS=Mus musculus OX=10090 G	4	5	5	16	44.357	393	33.041	6.1	16	40642000	156530000	3.85143
Q5I0W0;Q3UF04;Q3TJD4;Q9CQQ7;A0A0G2JGX3;Q64218	ATP synthase F(0) complex subunit B1, mitochondrial (ATP synthase peripheral stalk-membrane subunit b) (ATP synthase subunit b)	Atp5pb Atp5f1	tr|Q5I0W0|Q5I0W0_MOUSE ATP synthase F(0) complex subunit B1, mitochondrial OS=Mus musculus OX=10090 GN=Atp5pb PE=1 SV=1;tr|Q3UF04|Q3UF04_MOUSE ATP synthase F(0) complex subunit B1, mitochondrial OS=Mus musculus OX=10090 GN=Atp5pb PE=2 SV=1;tr|Q3TJD4|Q3TJD4	6	5	5	16.4	28.948	256	28.965	3.1	16.4	19803000	565020000	28.532
Q3TN10;Q3U2V0;Q3U2B5;Q80X82;Q3TA76;D3Z2M2;S4R2Q3	Uncharacterized protein	Sympk	tr|Q3TN10|Q3TN10_MOUSE Uncharacterized protein OS=Mus musculus OX=10090 GN=Sympk PE=2 SV=1;tr|Q3U2V0|Q3U2V0_MOUSE Uncharacterized protein OS=Mus musculus OX=10090 GN=Sympk PE=2 SV=1;tr|Q3U2B5|Q3U2B5_MOUSE Uncharacterized protein OS=Mus musculus OX=10090 GN	7	5	5	5.9	119.31	1067	42.229	4.4	5.9	37790000	102660000	2.71659
Q3TX38;Q3TTN3;Q60931;Q5EBQ0;J3QMG3	Voltage-dependent anion-selective channel protein 3	Vdac3	tr|Q3TX38|Q3TX38_MOUSE Voltage-dependent anion-selective channel protein 3 OS=Mus musculus OX=10090 GN=Vdac3 PE=1 SV=1;tr|Q3TTN3|Q3TTN3_MOUSE Voltage-dependent anion-selective channel protein 3 OS=Mus musculus OX=10090 GN=Vdac3 PE=2 SV=1;sp|Q60931|VDAC3_MO	5	5	5	24.7	30.752	283	32.914	0	24.7	0	323150000	#DIV/0!
Q3UPK6;Q3TUX3;Q3TUI9;Q9Z2U1	Proteasome subunit alpha type	Psma5	tr|Q3UPK6|Q3UPK6_MOUSE Proteasome subunit alpha type OS=Mus musculus OX=10090 GN=Psma5 PE=1 SV=1;tr|Q3TUX3|Q3TUX3_MOUSE Proteasome subunit alpha type OS=Mus musculus OX=10090 GN=Psma5 PE=2 SV=1;tr|Q3TUI9|Q3TUI9_MOUSE Proteasome subunit alpha type OS=Mus mu	4	5	5	29	26.411	241	35.375	24.9	29	249210000	436060000	1.74977
Q8BVK3;Q3TW96	Uncharacterized protein (Fragment)	Uap1l1	tr|Q8BVK3|Q8BVK3_MOUSE Uncharacterized protein (Fragment) OS=Mus musculus OX=10090 GN=Uap1l1 PE=2 SV=1;sp|Q3TW96|UAP1L_MOUSE UDP-N-acetylhexosamine pyrophosphorylase-like protein 1 OS=Mus musculus OX=10090 GN=Uap1l1 PE=1 SV=1	2	5	5	14.1	56.872	510	35.604	14.1	11	90750000	36991000	0.407614
Q3U3J9;Q3TX25;Q80VQ0;J3QMK6;Q3V4C9;E9Q3E1	Aldedh domain-containing protein (Fragment)	Aldh3b1	tr|Q3U3J9|Q3U3J9_MOUSE Aldedh domain-containing protein (Fragment) OS=Mus musculus OX=10090 GN=Aldh3b1 PE=2 SV=1;tr|Q3TX25|Q3TX25_MOUSE Aldehyde dehydrogenase OS=Mus musculus OX=10090 GN=Aldh3b1 PE=1 SV=1;sp|Q80VQ0|AL3B1_MOUSE Aldehyde dehydrogenase family	6	5	5	12.5	48.908	439	36.969	9.3	12.5	104650000	123530000	1.18041
Q3UME9;Q3U026;Q80UM7;Q3U950;Q3U8P9	Uncharacterized protein	Mogs Gcs1	tr|Q3UME9|Q3UME9_MOUSE Uncharacterized protein OS=Mus musculus OX=10090 GN=Mogs PE=2 SV=1;tr|Q3U026|Q3U026_MOUSE Uncharacterized protein OS=Mus musculus OX=10090 GN=Mogs PE=2 SV=1;sp|Q80UM7|MOGS_MOUSE Mannosyl-oligosaccharide glucosidase OS=Mus musculus OX	5	5	5	7.9	91.777	834	32.203	0	7.9	0	151750000	#DIV/0!
Q8R0M2;Q3U548;Q91ZJ5	UTP--glucose-1-phosphate uridylyltransferase (EC 2.7.7.9) (Fragment)	Ugp2	tr|Q8R0M2|Q8R0M2_MOUSE UTP--glucose-1-phosphate uridylyltransferase (Fragment) OS=Mus musculus OX=10090 GN=Ugp2 PE=2 SV=1;tr|Q3U548|Q3U548_MOUSE UTP--glucose-1-phosphate uridylyltransferase OS=Mus musculus OX=10090 GN=Ugp2 PE=2 SV=1;sp|Q91ZJ5|UGPA_MOUSE UT	3	5	5	16.4	55.497	495	36.918	16.4	10.3	65024000	51047000	0.785049
Q9D094;Q8VDX8;Q8C2D1;Q3UDH1;Q3U890;Q61035;A0A494BAV2;A0A494B9A1	Histidine--tRNA ligase, cytoplasmic (EC 6.1.1.21)	Hars	tr|Q9D094|Q9D094_MOUSE Histidine--tRNA ligase, cytoplasmic OS=Mus musculus OX=10090 GN=Hars PE=2 SV=1;tr|Q8VDX8|Q8VDX8_MOUSE Histidine--tRNA ligase, cytoplasmic OS=Mus musculus OX=10090 GN=Hars PE=2 SV=1;tr|Q8C2D1|Q8C2D1_MOUSE Histidine--tRNA ligase, cytop	8	5	5	10.2	57.543	509	31.137	10.2	8.1	78507000	40674000	0.518094
Q5SWN2;Q3U8B3;Q8VEE4	Replication protein A subunit	Rpa1	tr|Q5SWN2|Q5SWN2_MOUSE Replication protein A subunit OS=Mus musculus OX=10090 GN=Rpa1 PE=1 SV=2;tr|Q3U8B3|Q3U8B3_MOUSE Replication protein A subunit OS=Mus musculus OX=10090 GN=Rpa1 PE=2 SV=1;sp|Q8VEE4|RFA1_MOUSE Replication protein A 70 kDa DNA-binding su	3	5	5	10.4	71.413	644	35.691	7.6	8.9	80607000	86335000	1.07106
Q3UA52;Q9CVB6;Q4FZG5;D3YXG6;A0A087WRT2	Arp2/3 complex 34 kDa subunit (Fragment)	Arpc2	tr|Q3UA52|Q3UA52_MOUSE Arp2/3 complex 34 kDa subunit (Fragment) OS=Mus musculus OX=10090 GN=Arpc2 PE=2 SV=1;sp|Q9CVB6|ARPC2_MOUSE Actin-related protein 2/3 complex subunit 2 OS=Mus musculus OX=10090 GN=Arpc2 PE=1 SV=3;tr|Q4FZG5|Q4FZG5_MOUSE Arp2/3 complex	5	5	5	13.6	42.522	383	35.614	13.6	6	171650000	94978000	0.553324
Q3UKP5;Q9DCD2;F6TM12	Uncharacterized protein	Xab2	tr|Q3UKP5|Q3UKP5_MOUSE Uncharacterized protein OS=Mus musculus OX=10090 GN=Xab2 PE=2 SV=1;sp|Q9DCD2|SYF1_MOUSE Pre-mRNA-splicing factor SYF1 OS=Mus musculus OX=10090 GN=Xab2 PE=1 SV=1	3	5	5	7.1	99.903	855	33.195	2.8	7.1	24832000	85665000	3.44978
Q3UMM1;Q922F4;Q3U9U3;Q9CUN8;A2AQ07	Tubulin beta chain	Tubb6	tr|Q3UMM1|Q3UMM1_MOUSE Tubulin beta chain OS=Mus musculus OX=10090 GN=Tubb6 PE=1 SV=1;sp|Q922F4|TBB6_MOUSE Tubulin beta-6 chain OS=Mus musculus OX=10090 GN=Tubb6 PE=1 SV=1;tr|Q3U9U3|Q3U9U3_MOUSE Tubulin beta chain OS=Mus musculus OX=10090 GN=Tubb6 PE=2 SV=	5	14	5	38.5	50.09	447	67.069	38.5	38.5	845950000	247800000	0.292925
Q3V2D0;Q8CGK3;Q56A16	Lon protease homolog, mitochondrial (EC 3.4.21.53) (Lon protease-like protein) (LONP) (Mitochondrial ATP-dependent protease Lon) (Serine protease 15)	Lonp1 LONP1 Prss15	tr|Q3V2D0|Q3V2D0_MOUSE Lon protease homolog, mitochondrial OS=Mus musculus OX=10090 GN=Lonp1 PE=2 SV=1;sp|Q8CGK3|LONM_MOUSE Lon protease homolog, mitochondrial OS=Mus musculus OX=10090 GN=Lonp1 PE=1 SV=2;tr|Q56A16|Q56A16_MOUSE Lonp1 protein (Fragment) OS=M	3	5	5	8.5	106.48	953	33.373	1	8.5	24918000	217860000	8.74308
Q4VA29;Q9CQE8	RNA transcription, translation and transport factor protein	Rtraf 2700060E02Rik	tr|Q4VA29|Q4VA29_MOUSE RNA transcription, translation and transport factor protein OS=Mus musculus OX=10090 GN=Rtraf PE=1 SV=1;sp|Q9CQE8|RTRAF_MOUSE RNA transcription, translation and transport factor protein OS=Mus musculus OX=10090 GN=RTRAF PE=1 SV=1	2	5	5	23.8	28.152	244	34.725	23.8	23.8	95457000	268140000	2.80901
Q52L50;Q99JI6;A0A1W2P777	RAS related protein 1b	Rap1b	tr|Q52L50|Q52L50_MOUSE RAS related protein 1b OS=Mus musculus OX=10090 GN=Rap1b PE=1 SV=1;sp|Q99JI6|RAP1B_MOUSE Ras-related protein Rap-1b OS=Mus musculus OX=10090 GN=Rap1b PE=1 SV=2	3	10	5	50	20.825	184	89.189	50	50	1771800000	1341700000	0.757253
Q545E6;Q62348	Component 3 of promoter of RISC (Translin)	Tsn Tbrbp	tr|Q545E6|Q545E6_MOUSE Component 3 of promoter of RISC OS=Mus musculus OX=10090 GN=Tsn PE=1 SV=1;sp|Q62348|TSN_MOUSE Translin OS=Mus musculus OX=10090 GN=Tsn PE=1 SV=1	2	5	5	30.7	26.201	228	50.962	30.7	15.4	204580000	59471000	0.290698
Q58E59;Q9D554	Splicing factor 3a, subunit 3	Sf3a3	tr|Q58E59|Q58E59_MOUSE Splicing factor 3a, subunit 3 OS=Mus musculus OX=10090 GN=Sf3a3 PE=1 SV=1;sp|Q9D554|SF3A3_MOUSE Splicing factor 3A subunit 3 OS=Mus musculus OX=10090 GN=Sf3a3 PE=1 SV=2	2	5	5	13.8	58.841	501	33.002	13.8	13.8	44498000	126500000	2.84282
Q8CAG6;Q8C6F4;Q5F271;Q9JHK5;Q5F270	Pleckstrin	Plek	tr|Q8CAG6|Q8CAG6_MOUSE Pleckstrin OS=Mus musculus OX=10090 GN=Plek PE=1 SV=1;tr|Q8C6F4|Q8C6F4_MOUSE Uncharacterized protein OS=Mus musculus OX=10090 GN=Plek PE=2 SV=1;tr|Q5F271|Q5F271_MOUSE Uncharacterized protein OS=Mus musculus OX=10090 GN=Plek PE=1 SV=1	5	5	5	21.4	37.154	327	42.814	21.4	21.4	414710000	432080000	1.04188
Q5HZY7;Q9CR51;Q3U7E0	V-type proton ATPase subunit G	Atp6v1g1 Atp6g1	tr|Q5HZY7|Q5HZY7_MOUSE V-type proton ATPase subunit G OS=Mus musculus OX=10090 GN=Atp6v1g1 PE=1 SV=1;sp|Q9CR51|VATG1_MOUSE V-type proton ATPase subunit G 1 OS=Mus musculus OX=10090 GN=Atp6v1g1 PE=1 SV=3;tr|Q3U7E0|Q3U7E0_MOUSE V-type proton ATPase subunit G	3	5	5	39.8	13.724	118	81.796	36.4	39.8	139750000	1830500000	13.0984
Q5M9P3;Q9CZX8;D3YUT3;D3YUG3;D3Z5R8;D3Z722;S4R223	40S ribosomal protein S19 (Fragment)	Rps19	tr|Q5M9P3|Q5M9P3_MOUSE 40S ribosomal protein S19 (Fragment) OS=Mus musculus OX=10090 GN=Rps19 PE=2 SV=1;sp|Q9CZX8|RS19_MOUSE 40S ribosomal protein S19 OS=Mus musculus OX=10090 GN=Rps19 PE=1 SV=3;tr|D3YUT3|D3YUT3_MOUSE 40S ribosomal protein S19 (Fragment) O	7	5	5	28.5	16.661	151	40.913	28.5	28.5	109910000	1432900000	13.037
Q5SQ20;Q9EQ61	Pescadillo homolog	Pes1 PES1	tr|Q5SQ20|Q5SQ20_MOUSE Pescadillo homolog OS=Mus musculus OX=10090 GN=Pes1 PE=1 SV=1;sp|Q9EQ61|PESC_MOUSE Pescadillo homolog OS=Mus musculus OX=10090 GN=Pes1 PE=1 SV=1	2	5	5	8.2	68.23	588	30.626	4.9	8.2	61617000	51978000	0.843566
Q5SUA5	Unconventional myosin-Ig	Myo1g	sp|Q5SUA5|MYO1G_MOUSE Unconventional myosin-Ig OS=Mus musculus OX=10090 GN=Myo1g PE=1 SV=1	1	6	5	8.1	117.23	1024	44.082	6.5	7	63631000	120660000	1.89625
Q60848;D3Z414	Lymphocyte-specific helicase (EC 3.6.4.-) (Proliferation-associated SNF2-like protein)	Hells Lsh Pasg	sp|Q60848|HELLS_MOUSE Lymphocyte-specific helicase OS=Mus musculus OX=10090 GN=Hells PE=1 SV=2	2	5	5	7.3	95.125	821	30.791	0	7.3	0	142370000	#DIV/0!
Q61171;Q5M9N9;D3Z4A4	Peroxiredoxin-2 (EC 1.11.1.24) (Thiol-specific antioxidant protein) (TSA) (Thioredoxin peroxidase 1) (Thioredoxin-dependent peroxide reductase 1) (Thioredoxin-dependent peroxiredoxin 2)	Prdx2 Tdpx1 Tpx	sp|Q61171|PRDX2_MOUSE Peroxiredoxin-2 OS=Mus musculus OX=10090 GN=Prdx2 PE=1 SV=3;tr|Q5M9N9|Q5M9N9_MOUSE Prdx2 protein OS=Mus musculus OX=10090 GN=Prdx2 PE=2 SV=1;tr|D3Z4A4|D3Z4A4_MOUSE Peroxiredoxin-2 (Fragment) OS=Mus musculus OX=10090 GN=Prdx2 PE=1 SV=8	3	5	5	44.9	21.778	198	36.878	27.8	39.4	373550000	237260000	0.635149
Q64511;Q8BRY5;Q3TR62;F6XX57	DNA topoisomerase 2-beta (EC 5.6.2.2) (DNA topoisomerase II, beta isozyme)	Top2b	sp|Q64511|TOP2B_MOUSE DNA topoisomerase 2-beta OS=Mus musculus OX=10090 GN=Top2b PE=1 SV=2;tr|Q8BRY5|Q8BRY5_MOUSE DNA topoisomerase 2 (Fragment) OS=Mus musculus OX=10090 GN=Top2b PE=2 SV=1;tr|Q3TR62|Q3TR62_MOUSE DNA topoisomerase 2 (Fragment) OS=Mus muscul	4	10	5	7.9	181.91	1612	31.292	4.7	7.9	36896000	122390000	3.31716
Q68FC6;Q6ZQL4;A0A3Q4EHN7;A0A3Q4EGD3	Wrd43 protein (Fragment)	Wdr43 Wrd43	tr|Q68FC6|Q68FC6_MOUSE Wrd43 protein (Fragment) OS=Mus musculus OX=10090 GN=Wdr43 PE=2 SV=1;sp|Q6ZQL4|WDR43_MOUSE WD repeat-containing protein 43 OS=Mus musculus OX=10090 GN=Wdr43 PE=1 SV=2;tr|A0A3Q4EHN7|A0A3Q4EHN7_MOUSE WD repeat-containing protein 43 OS=	4	5	5	7.8	66.323	592	33.715	4.6	7.8	56656000	139530000	2.46276
Q8C4D5;Q6A0D4;Q80VF9	Uncharacterized protein (Fragment)	Rftn1	tr|Q8C4D5|Q8C4D5_MOUSE Uncharacterized protein (Fragment) OS=Mus musculus OX=10090 GN=Rftn1 PE=2 SV=1;sp|Q6A0D4|RFTN1_MOUSE Raftlin OS=Mus musculus OX=10090 GN=Rftn1 PE=1 SV=4	3	5	5	8.4	57.719	521	39.942	8.4	3.8	76742000	62842000	0.818874
Q6NV83;A0A087WRG2;A0A087WR93	U2 snRNP-associated SURP motif-containing protein (140 kDa Ser/Arg-rich domain protein) (U2-associated protein SR140)	U2surp Sr140	sp|Q6NV83|SR140_MOUSE U2 snRNP-associated SURP motif-containing protein OS=Mus musculus OX=10090 GN=U2surp PE=1 SV=3;tr|A0A087WRG2|A0A087WRG2_MOUSE U2 snRNP-associated SURP motif-containing protein OS=Mus musculus OX=10090 GN=U2surp PE=1 SV=1	3	5	5	7	118.26	1029	36.14	0	7	0	167000000	#DIV/0!
Q6P9L6;A0A1L1SU97;A0A1L1SVE8;A0A1L1SUV4	Kinesin-like protein KIF15 (Kinesin-like protein 2) (Kinesin-like protein 7)	Kif15 Klp2 Knsl7	sp|Q6P9L6|KIF15_MOUSE Kinesin-like protein KIF15 OS=Mus musculus OX=10090 GN=Kif15 PE=1 SV=1	4	5	5	5.8	160.12	1387	33.497	5.8	2.1	43082000	29051000	0.674319
Q6ZPX7;Q6P9R2	Non-specific serine/threonine protein kinase (EC 2.7.11.1) (Fragment)	mKIAA1101	tr|Q6ZPX7|Q6ZPX7_MOUSE Non-specific serine/threonine protein kinase (Fragment) OS=Mus musculus OX=10090 GN=mKIAA1101 PE=3 SV=1;sp|Q6P9R2|OXSR1_MOUSE Serine/threonine-protein kinase OSR1 OS=Mus musculus OX=10090 GN=Oxsr1 PE=1 SV=1	2	5	5	12	49.953	451	34.338	10	12	77194000	61870000	0.801487
Z4YJT3;Q6ZQ58;Q3UU34;Q8C4B1;Q9D423	La-related protein 1	Larp1	tr|Z4YJT3|Z4YJT3_MOUSE La-related protein 1 OS=Mus musculus OX=10090 GN=Larp1 PE=1 SV=1;sp|Q6ZQ58|LARP1_MOUSE La-related protein 1 OS=Mus musculus OX=10090 GN=Larp1 PE=1 SV=3	5	5	5	6.5	121.15	1072	50.26	4.7	6.5	51370000	211480000	4.1168
Q80SW1;H3BKT5;Q80TQ9;F8WI65;F8WGT1;Q68FL4;A0A0N4SUY4;Q3TSQ0;F7ATQ6;Q80WX1;D3Z2Q0;H3BL31;D3YYM7;A0PJF2	S-adenosylhomocysteine hydrolase-like protein 1 (IP3R-binding protein released with inositol 1,4,5-trisphosphate) (Putative adenosylhomocysteinase 2) (S-adenosyl-L-homocysteine hydrolase 2) (AdoHcyase 2)	Ahcyl1 Irbit	sp|Q80SW1|SAHH2_MOUSE S-adenosylhomocysteine hydrolase-like protein 1 OS=Mus musculus OX=10090 GN=Ahcyl1 PE=1 SV=1;tr|H3BKT5|H3BKT5_MOUSE Putative adenosylhomocysteinase 3 OS=Mus musculus OX=10090 GN=Ahcyl2 PE=1 SV=1;tr|Q80TQ9|Q80TQ9_MOUSE Adenosylhomocyst	14	5	5	9.2	58.951	530	39.125	9.2	7.7	184210000	113500000	0.616145
Q80VA0;Q3U9K4;Q3U8I4	N-acetylgalactosaminyltransferase 7 (EC 2.4.1.41) (Polypeptide GalNAc transferase 7) (GalNAc-T7) (pp-GaNTase 7) (Protein-UDP acetylgalactosaminyltransferase 7) (UDP-GalNAc:polypeptide N-acetylgalactosaminyltransferase 7)	Galnt7	sp|Q80VA0|GALT7_MOUSE N-acetylgalactosaminyltransferase 7 OS=Mus musculus OX=10090 GN=Galnt7 PE=1 SV=2;tr|Q3U9K4|Q3U9K4_MOUSE Polypeptide N-acetylgalactosaminyltransferase (Fragment) OS=Mus musculus OX=10090 GN=Galnt7 PE=2 SV=1	3	5	5	9	75.418	657	28.27	0	9	0	160900000	#DIV/0!
Q80X50;Q8BJ53;Q812D4;A0A0H2UH17;Q812D5;A0A0G2JDV6;A0A0G2JE24;A0A0G2JDT1;A0A0G2JGD0;A0A0G2JG47;Q8BZ69;Q80U73;A0A0G2JFN7;Q3TSB0	Ubiquitin-associated protein 2-like	Ubap2l	sp|Q80X50|UBP2L_MOUSE Ubiquitin-associated protein 2-like OS=Mus musculus OX=10090 GN=Ubap2l PE=1 SV=1;tr|Q8BJ53|Q8BJ53_MOUSE UBA domain-containing protein OS=Mus musculus OX=10090 GN=Ubap2l PE=2 SV=1;tr|Q812D4|Q812D4_MOUSE Lingerer protein-2b OS=Mus muscu	14	5	5	6.5	116.8	1107	41.417	3	6.5	28637000	162590000	5.67762
Q8BH24;Q14B57	Transmembrane 9 superfamily member 4	Tm9sf4 Kiaa0255	sp|Q8BH24|TM9S4_MOUSE Transmembrane 9 superfamily member 4 OS=Mus musculus OX=10090 GN=Tm9sf4 PE=1 SV=1;tr|Q14B57|Q14B57_MOUSE Transmembrane 9 superfamily member OS=Mus musculus OX=10090 GN=Tm9sf4 PE=2 SV=1	2	5	5	11.4	74.692	643	37.264	6.5	11.4	35478000	273430000	7.70703
Q8BHC2;Q9CX00	IST1 homolog	Ist1 2400003C14Rik	tr|Q8BHC2|Q8BHC2_MOUSE IST1 homolog OS=Mus musculus OX=10090 GN=Ist1 PE=2 SV=1;sp|Q9CX00|IST1_MOUSE IST1 homolog OS=Mus musculus OX=10090 GN=Ist1 PE=1 SV=1	2	5	5	20.4	31.201	285	31.002	20.4	16.8	84331000	95490000	1.13232
Q8R2M5;Q8BIJ6;Q810V2;E9PWN2	Iars2 protein (Fragment)	Iars2	tr|Q8R2M5|Q8R2M5_MOUSE Iars2 protein (Fragment) OS=Mus musculus OX=10090 GN=Iars2 PE=2 SV=1;sp|Q8BIJ6|SYIM_MOUSE Isoleucine--tRNA ligase, mitochondrial OS=Mus musculus OX=10090 GN=Iars2 PE=1 SV=1;tr|Q810V2|Q810V2_MOUSE Iars2 protein (Fragment) OS=Mus muscu	4	5	5	12.3	60.128	536	31.127	4.7	12.3	31262000	183720000	5.87678
Q8BT07	Centrosomal protein of 55 kDa (Cep55)	Cep55	sp|Q8BT07|CEP55_MOUSE Centrosomal protein of 55 kDa OS=Mus musculus OX=10090 GN=Cep55 PE=1 SV=2	1	5	5	11.7	53.93	462	33.301	10	6.5	70151000	32194000	0.458924
Q8CCG5;Q9JIW9;F6QC68	Small monomeric GTPase (EC 3.6.5.2)	Ralb	tr|Q8CCG5|Q8CCG5_MOUSE Small monomeric GTPase OS=Mus musculus OX=10090 GN=Ralb PE=2 SV=1;sp|Q9JIW9|RALB_MOUSE Ras-related protein Ral-B OS=Mus musculus OX=10090 GN=Ralb PE=1 SV=1;tr|F6QC68|F6QC68_MOUSE Small monomeric GTPase (Fragment) OS=Mus musculus OX=1	3	7	5	28.6	23.348	206	52.925	23.3	27.7	237840000	346840000	1.45829
Q8K0C9	GDP-mannose 4,6 dehydratase (EC 4.2.1.47) (GDP-D-mannose dehydratase) (GMD)	Gmds	sp|Q8K0C9|GMDS_MOUSE GDP-mannose 4,6 dehydratase OS=Mus musculus OX=10090 GN=Gmds PE=1 SV=1	1	5	5	14.5	41.984	372	31.878	14.5	10.5	171070000	58162000	0.339989
Q8K224;A2BH46	RNA cytidine acetyltransferase (EC 2.3.1.-) (18S rRNA cytosine acetyltransferase) (N-acetyltransferase 10)	Nat10 Kiaa1709	sp|Q8K224|NAT10_MOUSE RNA cytidine acetyltransferase OS=Mus musculus OX=10090 GN=Nat10 PE=1 SV=1	2	5	5	9.2	115.42	1024	32.184	5	9.2	10288000	82493000	8.01837
Q8K2B3;A0A1Y7VJ55	Succinate dehydrogenase [ubiquinone] flavoprotein subunit, mitochondrial (EC 1.3.5.1) (Flavoprotein subunit of complex II) (Fp)	Sdha	sp|Q8K2B3|SDHA_MOUSE Succinate dehydrogenase [ubiquinone] flavoprotein subunit, mitochondrial OS=Mus musculus OX=10090 GN=Sdha PE=1 SV=1	2	5	5	12.2	72.585	664	43.829	5.9	12.2	50331000	263960000	5.24448
Q8R1F1	Protein Niban 2 (Meg-3) (Niban-like protein 1) (Protein FAM129B)	Niban2 Fam129b	sp|Q8R1F1|NIBA2_MOUSE Protein Niban 2 OS=Mus musculus OX=10090 GN=Niban2 PE=1 SV=2	1	5	5	8.1	84.818	749	34.487	8.1	8.1	118280000	55359000	0.468033
Q8R2Y8	Peptidyl-tRNA hydrolase 2, mitochondrial (PTH 2) (EC 3.1.1.29)	Ptrh2 Pth2	sp|Q8R2Y8|PTH2_MOUSE Peptidyl-tRNA hydrolase 2, mitochondrial OS=Mus musculus OX=10090 GN=Ptrh2 PE=1 SV=1	1	5	5	42	19.526	181	32.51	8.3	42	1971000	154250000	78.2598
Q8R5H1;Q3TQV7;Q3TPH3;Q3TSV9	Ubiquitin carboxyl-terminal hydrolase 15 (EC 3.4.19.12) (Deubiquitinating enzyme 15) (Ubiquitin thioesterase 15) (Ubiquitin-specific-processing protease 15)	Usp15 Kiaa0529	sp|Q8R5H1|UBP15_MOUSE Ubiquitin carboxyl-terminal hydrolase 15 OS=Mus musculus OX=10090 GN=Usp15 PE=1 SV=1	4	5	5	7.3	112.32	981	43.392	7.3	3.1	44002000	23305000	0.529635
Q8VHX6;Q3UXJ8;Q80X90	Filamin-C (FLN-C) (ABP-280-like protein) (ABP-L) (Actin-binding-like protein) (Filamin-2) (Gamma-filamin)	Flnc Abpl Fln2	sp|Q8VHX6|FLNC_MOUSE Filamin-C OS=Mus musculus OX=10090 GN=Flnc PE=1 SV=3	3	8	5	4.3	291.12	2726	37.324	3.4	4.3	84837000	109280000	1.28812
Q91WM3	U3 small nucleolar RNA-interacting protein 2 (RRP9 homolog) (U3 small nucleolar ribonucleoprotein-associated 55 kDa protein) (U3 snoRNP-associated 55 kDa protein) (U3-55K)	Rrp9 Rnu3ip2 U3-55k	sp|Q91WM3|U3IP2_MOUSE U3 small nucleolar RNA-interacting protein 2 OS=Mus musculus OX=10090 GN=Rrp9 PE=1 SV=1	1	5	5	9.5	52.106	475	34.306	9.5	9.5	143550000	107160000	0.746499
Q91Y95;Q9JMH6	Thioredoxin-disulfide reductase (EC 1.8.1.9) (Fragment)	Txnrd1	tr|Q91Y95|Q91Y95_MOUSE Thioredoxin-disulfide reductase (Fragment) OS=Mus musculus OX=10090 GN=Txnrd1 PE=4 SV=1;sp|Q9JMH6|TRXR1_MOUSE Thioredoxin reductase 1, cytoplasmic OS=Mus musculus OX=10090 GN=Txnrd1 PE=1 SV=3	2	5	5	27.6	32.485	297	42.501	27.6	27.6	55903000	36328000	0.64984
Q99JY0;D3YXU1	Trifunctional enzyme subunit beta, mitochondrial (TP-beta) [Includes: 3-ketoacyl-CoA thiolase (EC 2.3.1.155) (EC 2.3.1.16) (Acetyl-CoA acyltransferase) (Beta-ketothiolase)]	Hadhb	sp|Q99JY0|ECHB_MOUSE Trifunctional enzyme subunit beta, mitochondrial OS=Mus musculus OX=10090 GN=Hadhb PE=1 SV=1;tr|D3YXU1|D3YXU1_MOUSE Trifunctional enzyme subunit beta, mitochondrial (Fragment) OS=Mus musculus OX=10090 GN=Hadhb PE=1 SV=1	2	5	5	15.4	51.386	475	32.923	0	15.4	0	210440000	#DIV/0!
Q99L27;A0A2I3BQX8	GMP reductase 2 (GMPR 2) (EC 1.7.1.7) (Guanosine 5'-monophosphate oxidoreductase 2) (Guanosine monophosphate reductase 2)	Gmpr2	sp|Q99L27|GMPR2_MOUSE GMP reductase 2 OS=Mus musculus OX=10090 GN=Gmpr2 PE=1 SV=2	2	5	5	17.2	38.018	348	35.735	17.2	0	217990000	0	0
Q9CQ43;Q9JJ44;Q8VCG1	Deoxyuridine 5'-triphosphate nucleotidohydrolase (dUTPase) (EC 3.6.1.23) (dUTP pyrophosphatase)	Dut	tr|Q9CQ43|Q9CQ43_MOUSE Deoxyuridine 5-triphosphate nucleotidohydrolase OS=Mus musculus OX=10090 GN=Dut PE=1 SV=1;tr|Q9JJ44|Q9JJ44_MOUSE Deoxyuridine 5-triphosphate nucleotidohydrolase OS=Mus musculus OX=10090 GN=Dut PE=2 SV=1;tr|Q8VCG1|Q8VCG1_MOUSE Deoxy	3	5	5	38.3	17.384	162	38.358	33.3	38.3	58127000	82876000	1.42577
Q9CQR6;A0A0N4SVL9;A0A0N4SVE2;A0A0N4SW66	Serine/threonine-protein phosphatase 6 catalytic subunit (PP6C) (EC 3.1.3.16)	Ppp6c	sp|Q9CQR6|PPP6_MOUSE Serine/threonine-protein phosphatase 6 catalytic subunit OS=Mus musculus OX=10090 GN=Ppp6c PE=1 SV=1;tr|A0A0N4SVL9|A0A0N4SVL9_MOUSE Serine/threonine-protein phosphatase OS=Mus musculus OX=10090 GN=Ppp6c PE=1 SV=1	4	5	5	26.6	35.159	305	36.463	26.6	20.3	146940000	80215000	0.545903
Q9CWK0;Q9CR57;Q569Z0;A0A1L1SUF6;Q922F9	60S ribosomal protein L14	Rpl14	tr|Q9CWK0|Q9CWK0_MOUSE 60S ribosomal protein L14 OS=Mus musculus OX=10090 GN=Rpl14 PE=2 SV=1;sp|Q9CR57|RL14_MOUSE 60S ribosomal protein L14 OS=Mus musculus OX=10090 GN=Rpl14 PE=1 SV=3;tr|Q569Z0|Q569Z0_MOUSE 60S ribosomal protein L14 OS=Mus musculus OX=1009	5	5	5	24.7	26.316	227	46.506	15.4	24.7	259030000	1583800000	6.11435
Q9CX34;Q9CRG3	Protein SGT1 homolog (Suppressor of G2 allele of SKP1 homolog)	Sugt1	sp|Q9CX34|SGT1_MOUSE Protein SGT1 homolog OS=Mus musculus OX=10090 GN=Sugt1 PE=1 SV=3	2	5	5	22.6	38.158	336	32.644	18.5	22.6	84339000	94076000	1.11545
Q9D0T1	NHP2-like protein 1 (Fertilization antigen 1) (FA-1) (High mobility group-like nuclear protein 2 homolog 1) (Sperm-specific antigen 1) (U4/U6.U5 small nuclear ribonucleoprotein SNU13) (U4/U6.U5 tri-snRNP 15.5 kDa protein) [Cleaved into: NHP2-like protein 1, N-terminally processed]	Snu13 Nhp2l1 Ssfa1	sp|Q9D0T1|NH2L1_MOUSE NHP2-like protein 1 OS=Mus musculus OX=10090 GN=Snu13 PE=1 SV=4	1	5	5	41.4	14.173	128	40.636	25	41.4	166500000	618480000	3.71459
Q9D1M0	Protein SEC13 homolog (GATOR complex protein SEC13) (SEC13-like protein 1) (SEC13-related protein)	Sec13 Sec13l1	sp|Q9D1M0|SEC13_MOUSE Protein SEC13 homolog OS=Mus musculus OX=10090 GN=Sec13 PE=1 SV=3	1	5	5	24.8	35.565	322	50.823	24.8	16.8	627580000	300030000	0.478075
Q9D1P4;A0A1L1STZ1;A0A1L1SU22;A0A1L1STQ1;A0A1L1SSG7	Cysteine and histidine-rich domain-containing protein 1 (CHORD domain-containing protein 1) (CHORD-containing protein 1) (Chp-1) (Protein morgana)	Chordc1 Chp1 Morgana	sp|Q9D1P4|CHRD1_MOUSE Cysteine and histidine-rich domain-containing protein 1 OS=Mus musculus OX=10090 GN=Chordc1 PE=1 SV=1;tr|A0A1L1STZ1|A0A1L1STZ1_MOUSE Cysteine and histidine-rich domain-containing protein 1 OS=Mus musculus OX=10090 GN=Chordc1 PE=1 SV=1	5	5	5	23.3	37.35	331	49.307	23.3	19	213760000	194640000	0.910554
Q9DB77;A0A140LI98	Cytochrome b-c1 complex subunit 2, mitochondrial (Complex III subunit 2) (Core protein II) (Ubiquinol-cytochrome-c reductase complex core protein 2)	Uqcrc2	sp|Q9DB77|QCR2_MOUSE Cytochrome b-c1 complex subunit 2, mitochondrial OS=Mus musculus OX=10090 GN=Uqcrc2 PE=1 SV=1	2	5	5	15.5	48.234	453	46.727	0	15.5	0	840350000	#DIV/0!
Q9DBG5;Q2XSQ4;A0A3B2WCW2	Perilipin-3 (Cargo selection protein TIP47) (Mannose-6-phosphate receptor-binding protein 1)	Plin3 M6prbp1 Tip47	sp|Q9DBG5|PLIN3_MOUSE Perilipin-3 OS=Mus musculus OX=10090 GN=Plin3 PE=1 SV=1;tr|Q2XSQ4|Q2XSQ4_MOUSE Perilipin OS=Mus musculus OX=10090 GN=Plin3 PE=2 SV=1	3	5	5	19.5	47.262	437	43.428	4.3	19.5	1578800	204070000	129.256
Q9QYA2;Q3UQD0	Mitochondrial import receptor subunit TOM40 homolog (Mitochondrial outer membrane protein of 35 kDa) (MOM35) (Protein Haymaker) (Translocase of outer membrane 40 kDa subunit homolog)	Tomm40 Mom35 Tom40	sp|Q9QYA2|TOM40_MOUSE Mitochondrial import receptor subunit TOM40 homolog OS=Mus musculus OX=10090 GN=Tomm40 PE=1 SV=3;tr|Q3UQD0|Q3UQD0_MOUSE Uncharacterized protein (Fragment) OS=Mus musculus OX=10090 GN=Tomm40 PE=2 SV=1	2	5	5	22.4	37.895	361	33.606	4.2	22.4	8362000	212870000	25.4568
A0A087WNV1;A0A087WSR7;A0A087WR52;Q8K2K6;A0A087WRL1	Arf-GAP domain and FG repeat-containing protein 1	Agfg1	tr|A0A087WNV1|A0A087WNV1_MOUSE Arf-GAP domain and FG repeat-containing protein 1 OS=Mus musculus OX=10090 GN=Agfg1 PE=1 SV=1;tr|A0A087WSR7|A0A087WSR7_MOUSE Arf-GAP domain and FG repeat-containing protein 1 OS=Mus musculus OX=10090 GN=Agfg1 PE=1 SV=1;tr|A0A	5	4	4	10.7	53.974	521	27.816	10.7	10.7	95603000	126050000	1.31847
A0A087WRZ5;Q8R0B4;C9DT14;Q8BLD4;Q8BUM1;Q6VYI5;Q6VYI4;Q544R5;Q921F2;A0A087WQX8;A0A087WNY6;A0A087WS74;A0A087WRP4;H3BJV1;A0A087WSH7;A0A087WQA5;A0A087WR97;Q05C33;D2KPZ5;A0A087WS17;A0A087WSC6;A0A087WSE4	TAR DNA-binding protein 43	Tardbp	tr|A0A087WRZ5|A0A087WRZ5_MOUSE TAR DNA-binding protein 43 OS=Mus musculus OX=10090 GN=Tardbp PE=1 SV=1;tr|Q8R0B4|Q8R0B4_MOUSE TAR DNA-binding protein 43 OS=Mus musculus OX=10090 GN=Tardbp PE=1 SV=1;tr|C9DT14|C9DT14_MOUSE TAR DNA-binding protein 43 OS=Mus m	22	4	4	16.5	32.177	285	26.309	12.6	16.5	106490000	582100000	5.46624
S4R2D5;Q3TM87;Q3TAB9;A0A0A0MQN4;Q9D906;S4R2T5;S4R2P7;S4R1T0	Ubiquitin-like modifier-activating enzyme ATG7	Atg7	tr|S4R2D5|S4R2D5_MOUSE Ubiquitin-like modifier-activating enzyme ATG7 OS=Mus musculus OX=10090 GN=Atg7 PE=1 SV=1;tr|Q3TM87|Q3TM87_MOUSE Ubiquitin-like modifier-activating enzyme ATG7 OS=Mus musculus OX=10090 GN=Atg7 PE=2 SV=1;tr|Q3TAB9|Q3TAB9_MOUSE Ubiquit	8	4	4	9.4	68.243	618	30.033	9.4	6.8	139160000	58469000	0.420157
A0A0A1HAM8;P26645;Q05BL6	80K protein	Marcks	tr|A0A0A1HAM8|A0A0A1HAM8_MOUSE 80K protein OS=Mus musculus OX=10090 GN=Marcks PE=2 SV=1;sp|P26645|MARCS_MOUSE Myristoylated alanine-rich C-kinase substrate OS=Mus musculus OX=10090 GN=Marcks PE=1 SV=2;tr|Q05BL6|Q05BL6_MOUSE Marcks protein (Fragment) OS=Mus	3	4	4	21.4	29.721	309	36.668	21.4	16.5	175440000	211070000	1.20309
A0A0A6YVU8;A0A1S6GWG3;Q9JKV1;Q8VCI8;D3YUD8	Predicted pseudogene 9774	Gm9774	tr|A0A0A6YVU8|A0A0A6YVU8_MOUSE Predicted pseudogene 9774 OS=Mus musculus OX=10090 GN=Gm9774 PE=3 SV=1;tr|A0A1S6GWG3|A0A1S6GWG3_MOUSE RPN13_C domain-containing protein OS=Mus musculus OX=10090 GN=Adrm1 PE=2 SV=1;sp|Q9JKV1|ADRM1_MOUSE Proteasomal ubiquitin r	5	4	4	10.8	42.147	407	29.957	10.8	10.8	131090000	109680000	0.836677
A0A0B4J1E6;P08101;E9Q415;A0A0B4J1G1	Fc receptor, IgG, low affinity IIb	Fcgr2b	tr|A0A0B4J1E6|A0A0B4J1E6_MOUSE Fc receptor, IgG, low affinity IIb OS=Mus musculus OX=10090 GN=Fcgr2b PE=1 SV=1;sp|P08101|FCGR2_MOUSE Low affinity immunoglobulin gamma Fc region receptor II OS=Mus musculus OX=10090 GN=Fcgr2 PE=1 SV=2;tr|E9Q415|E9Q415_MOUSE	4	4	4	14.4	37.79	340	33.201	14.4	10.3	254550000	123780000	0.48627
A2AKI5;A0A0F7IQ06;P43406;Q3U4C8	Integrin alpha-V	Itgav	tr|A2AKI5|A2AKI5_MOUSE Integrin alpha-V OS=Mus musculus OX=10090 GN=Itgav PE=1 SV=1;tr|A0A0F7IQ06|A0A0F7IQ06_MOUSE Alpha v integrin OS=Mus musculus OX=10090 GN=Itgav PE=2 SV=1;sp|P43406|ITAV_MOUSE Integrin alpha-V OS=Mus musculus OX=10090 GN=Itgav PE=1 SV=	4	4	4	6.8	111.51	1008	26.311	6.8	6	53258000	43486000	0.816516
A0A0G2JDI9;Q9DBZ6;Q91VT3;Q3UNS0;Q3U645;P55096	ATP-binding cassette sub-family D member 3	Abcd3	tr|A0A0G2JDI9|A0A0G2JDI9_MOUSE ATP-binding cassette sub-family D member 3 OS=Mus musculus OX=10090 GN=Abcd3 PE=1 SV=1;tr|Q9DBZ6|Q9DBZ6_MOUSE Uncharacterized protein OS=Mus musculus OX=10090 GN=Abcd3 PE=2 SV=1;tr|Q91VT3|Q91VT3_MOUSE ATP-binding cassette, su	6	4	4	11.5	62.697	549	31.231	0	11.5	0	208680000	#DIV/0!
A0A0R4J0I9;Q91ZX7;Q3U454	Prolow-density lipoprotein receptor-related protein 1	Lrp1	tr|A0A0R4J0I9|A0A0R4J0I9_MOUSE Prolow-density lipoprotein receptor-related protein 1 OS=Mus musculus OX=10090 GN=Lrp1 PE=1 SV=1;sp|Q91ZX7|LRP1_MOUSE Prolow-density lipoprotein receptor-related protein 1 OS=Mus musculus OX=10090 GN=Lrp1 PE=1 SV=1	3	4	4	1	504.77	4545	27.272	0.8	1	23383000	37564000	1.60647
Q80U79;Z4YL78;A0A0R4J0K2;K3W4R5;A2AGT5;Q4V782;Q8K250;Q6PB55	MKIAA0097 protein (Fragment)	Ckap5 mKIAA0097	tr|Q80U79|Q80U79_MOUSE MKIAA0097 protein (Fragment) OS=Mus musculus OX=10090 GN=Ckap5 PE=2 SV=1;tr|Z4YL78|Z4YL78_MOUSE Cytoskeleton-associated protein 5 OS=Mus musculus OX=10090 GN=Ckap5 PE=1 SV=1;tr|A0A0R4J0K2|A0A0R4J0K2_MOUSE Cytoskeleton-associated prot	8	4	4	3.1	189.49	1711	30.91	0.8	3.1	17160000	53377000	3.11055
Z4YLI8;A0A0R4J140;Q5SW19;Q6P7U7	Clustered mitochondria protein homolog	Cluh	tr|Z4YLI8|Z4YLI8_MOUSE Clustered mitochondria protein homolog OS=Mus musculus OX=10090 GN=Cluh PE=1 SV=1;tr|A0A0R4J140|A0A0R4J140_MOUSE Clustered mitochondria protein homolog OS=Mus musculus OX=10090 GN=Cluh PE=1 SV=1;sp|Q5SW19|CLU_MOUSE Clustered mitochon	4	4	4	3.4	146.02	1302	32.397	3.4	1.5	65995000	21068000	0.319236
A0A0R4J150;B9EJ86;A0A5F8MPC5	Oxysterol-binding protein	Osbpl8	tr|A0A0R4J150|A0A0R4J150_MOUSE Oxysterol-binding protein OS=Mus musculus OX=10090 GN=Osbpl8 PE=1 SV=1;sp|B9EJ86|OSBL8_MOUSE Oxysterol-binding protein-related protein 8 OS=Mus musculus OX=10090 GN=Osbpl8 PE=1 SV=1;tr|A0A5F8MPC5|A0A5F8MPC5_MOUSE Oxysterol-bi	3	4	4	7.1	96.98	847	25.742	1.3	7.1	18295000	126610000	6.92047
A0A0R4J1B9;G3X9M0;Q9ER88;G3UWM7;G3UWZ6;G3UWJ4;G3UZC0;G3UWR5	28S ribosomal protein S29, mitochondrial	Dap3	tr|A0A0R4J1B9|A0A0R4J1B9_MOUSE 28S ribosomal protein S29, mitochondrial OS=Mus musculus OX=10090 GN=Dap3 PE=1 SV=1;tr|G3X9M0|G3X9M0_MOUSE 28S ribosomal protein S29, mitochondrial OS=Mus musculus OX=10090 GN=Dap3 PE=1 SV=1;sp|Q9ER88|RT29_MOUSE 28S ribosomal	8	4	4	12.8	42.123	366	24.741	3.3	12.8	17065000	89674000	5.25485
F6RBR6;Q8BME2;Q5M9K5;A0A0R4J275;Q7TMF3	NADH dehydrogenase [ubiquinone] 1 alpha subcomplex subunit 12	Ndufa12	tr|F6RBR6|F6RBR6_MOUSE NADH dehydrogenase [ubiquinone] 1 alpha subcomplex subunit 12 OS=Mus musculus OX=10090 GN=Ndufa12 PE=1 SV=2;tr|Q8BME2|Q8BME2_MOUSE NADH dehydrogenase [ubiquinone] 1 alpha subcomplex subunit 12 OS=Mus musculus OX=10090 GN=Ndufa12 PE=2	5	4	4	35.3	9.8821	85	26.718	10.6	35.3	17525000	97886000	5.58551
A0A0U1RNK7;E9PX48;A2A9M5;A2A9M4;Q8R1A4;A2AW79;F6ZJ55;Q7TPP0;Q3U806;A0A0U1RNY4	Dedicator of cytokinesis protein 7	Dock7	tr|A0A0U1RNK7|A0A0U1RNK7_MOUSE Dedicator of cytokinesis protein 7 OS=Mus musculus OX=10090 GN=Dock7 PE=1 SV=1;tr|E9PX48|E9PX48_MOUSE Dedicator of cytokinesis protein 7 OS=Mus musculus OX=10090 GN=Dock7 PE=1 SV=2;tr|A2A9M5|A2A9M5_MOUSE Dedicator of cytokine	10	4	4	2.5	238.09	2098	23.453	1.9	1.7	25963000	53140000	2.04676
E9Q5Q0;Q3TYH7;Q3TGG2;A0A0U1RPL0;Q7TQH0	Ataxin-2-like protein (Fragment)	Atxn2l	tr|E9Q5Q0|E9Q5Q0_MOUSE Ataxin-2-like protein (Fragment) OS=Mus musculus OX=10090 GN=Atxn2l PE=1 SV=2;tr|Q3TYH7|Q3TYH7_MOUSE LsmAD domain-containing protein OS=Mus musculus OX=10090 GN=Atxn2l PE=2 SV=1;tr|Q3TGG2|Q3TGG2_MOUSE Ataxin-2-like protein OS=Mus mus	5	4	4	5.3	92.071	863	25.378	5.3	4.3	43198000	106610000	2.46794
A0A1C7CYU3;Q8BRD3;Q02819;A0A1B0GR41;Q3TCI1;A0A1B0GT83;A0A1B0GS16;A0A1B0GR92	Nucleobindin-1	Nucb1	tr|A0A1C7CYU3|A0A1C7CYU3_MOUSE Nucleobindin-1 OS=Mus musculus OX=10090 GN=Nucb1 PE=1 SV=1;tr|Q8BRD3|Q8BRD3_MOUSE Nucleobindin-1 OS=Mus musculus OX=10090 GN=Nucb1 PE=2 SV=1;sp|Q02819|NUCB1_MOUSE Nucleobindin-1 OS=Mus musculus OX=10090 GN=Nucb1 PE=1 SV=2;tr|	8	4	4	9.9	52.997	455	31.53	0	9.9	0	192830000	#DIV/0!
A0A1C7CYV0;Q3UKB1;Q3UJG9;B1AX58;Q99K51;Q3V0K9;Q3V3X1	Plastin-3 (Fragment)	Pls3	tr|A0A1C7CYV0|A0A1C7CYV0_MOUSE Plastin-3 (Fragment) OS=Mus musculus OX=10090 GN=Pls3 PE=1 SV=1;tr|Q3UKB1|Q3UKB1_MOUSE Uncharacterized protein OS=Mus musculus OX=10090 GN=Pls3 PE=2 SV=1;tr|Q3UJG9|Q3UJG9_MOUSE Uncharacterized protein OS=Mus musculus OX=10090	7	6	4	12.1	70.642	629	30.801	12.1	9.5	78170000	36808000	0.470871
A0A1D5RLS1;Q60902	Epidermal growth factor receptor substrate 15-like 1	Eps15l1	tr|A0A1D5RLS1|A0A1D5RLS1_MOUSE Epidermal growth factor receptor substrate 15-like 1 OS=Mus musculus OX=10090 GN=Eps15l1 PE=1 SV=1;sp|Q60902|EP15R_MOUSE Epidermal growth factor receptor substrate 15-like 1 OS=Mus musculus OX=10090 GN=Eps15l1 PE=1 SV=3	2	4	4	8	66.204	599	39.251	8	8	70097000	42536000	0.606816
Q3UDS7;Q3TJ10;A0A1L1SSF2;Q8VDL4	ADP-dependent glucokinase	Adpgk	tr|Q3UDS7|Q3UDS7_MOUSE ADP-dependent glucokinase OS=Mus musculus OX=10090 GN=Adpgk PE=1 SV=1;tr|Q3TJ10|Q3TJ10_MOUSE Uncharacterized protein OS=Mus musculus OX=10090 GN=Adpgk PE=2 SV=1;tr|A0A1L1SSF2|A0A1L1SSF2_MOUSE ADP-dependent glucokinase OS=Mus musculus	4	4	4	11.1	53.788	495	40.196	0	11.1	0	102660000	#DIV/0!
Q45VK5;Q45VK6;A0A1L1STE4;Q9Z1X4;A0A1L1SQR7;Q3UD30	Interleukin enhancer-binding factor 3 (Nuclear factor 90)	Ilf3	tr|Q45VK5|Q45VK5_MOUSE Interleukin enhancer-binding factor 3 OS=Mus musculus OX=10090 GN=Ilf3 PE=1 SV=1;tr|Q45VK6|Q45VK6_MOUSE Nuclear factor 90 OS=Mus musculus OX=10090 GN=Ilf3 PE=2 SV=1;tr|A0A1L1STE4|A0A1L1STE4_MOUSE Interleukin enhancer-binding factor 3	6	4	4	7.5	76.347	703	27.858	4	7.5	25182000	73533000	2.92006
A0A2I3BQF4;Q497D7;Q58DZ3;P62889;Q5PR15	60S ribosomal protein L30	Rpl30	tr|A0A2I3BQF4|A0A2I3BQF4_MOUSE 60S ribosomal protein L30 OS=Mus musculus OX=10090 GN=Rpl30 PE=1 SV=1;tr|Q497D7|Q497D7_MOUSE 60S ribosomal protein L30 OS=Mus musculus OX=10090 GN=Rpl30 PE=2 SV=1;tr|Q58DZ3|Q58DZ3_MOUSE 60S ribosomal protein L30 OS=Mus muscul	5	4	4	62.8	10.457	94	44.14	45.7	62.8	334250000	1539300000	4.60524
A0A494B908;A0A494BAW2;P19157;A0A494BAS3;A0A494BAU3;K9JA74;P46425;A0A494BAM8;Q8VC73;F6RWR5	GST class-pi (EC 2.5.1.18) (Fragment)	Gstp1	tr|A0A494B908|A0A494B908_MOUSE GST class-pi (Fragment) OS=Mus musculus OX=10090 GN=Gstp1 PE=1 SV=1;tr|A0A494BAW2|A0A494BAW2_MOUSE GST class-pi OS=Mus musculus OX=10090 GN=Gstp1 PE=1 SV=1;sp|P19157|GSTP1_MOUSE Glutathione S-transferase P 1 OS=Mus musculus O	10	4	4	35	18.038	160	45.449	35	35	182940000	193430000	1.05734
D3YXX5;A0A494BAS8;D3Z0K1;D3Z1U9;D3YUM1;Q91YT0	NADH dehydrogenase [ubiquinone] flavoprotein 1, mitochondrial (Fragment)	Ndufv1	tr|D3YXX5|D3YXX5_MOUSE NADH dehydrogenase [ubiquinone] flavoprotein 1, mitochondrial (Fragment) OS=Mus musculus OX=10090 GN=Ndufv1 PE=1 SV=1;tr|A0A494BAS8|A0A494BAS8_MOUSE NADH dehydrogenase [ubiquinone] flavoprotein 1, mitochondrial (Fragment) OS=Mus musc	6	4	4	43.5	12.55	115	27.296	21.7	34.8	30859000	47230000	1.53051
Q3UBW0;A0A494BAT0;W5XHY0;Q3TH01;Q7JJ15;Q3TVI9;P01901;K7WBQ4;G3UXW2;A0A494BA33;W5XIT1;Q31188;Q61895;W5XIK7;Q31173;P14426;P04223;D2YW38;K7X379;K7W4D1;A0A286R3P5;A0A482D1Q0;A0A286R3P2;E9PWT4;E9QJR9;Q31152;P79568;P79567;Q95H92;Q8R3Y0;Q52PG7;Q31168;Q31167;O78207;Q3KQJ3;Q7TN03;Q8HWB2;W5XQG0;Q95457;Q792Z7;Q5KTQ0;Q61891;A0A218PH06;Q61892;Q31149;Q64272;Q61896;Q61642;G3UZP7;P14430;P14428;P14429;P01899;P018…	Ig-like domain-containing protein	H2-K1	tr|Q3UBW0|Q3UBW0_MOUSE Ig-like domain-containing protein OS=Mus musculus OX=10090 GN=H2-K1 PE=1 SV=1;tr|A0A494BAT0|A0A494BAT0_MOUSE H-2 class I histocompatibility antigen, K-K alpha chain OS=Mus musculus OX=10090 GN=H2-K1 PE=1 SV=1;tr|W5XHY0|W5XHY0_MOUSE M	246	4	4	14.4	38.939	347	48.882	14.4	14.4	84738000	73605000	0.868619
Q3UH23;A0A498WGK6;Q571B0;Q9ET30;Q8C6F5	Transmembrane 9 superfamily member	Tm9sf3 Smbp	tr|Q3UH23|Q3UH23_MOUSE Transmembrane 9 superfamily member OS=Mus musculus OX=10090 GN=Tm9sf3 PE=2 SV=1;tr|A0A498WGK6|A0A498WGK6_MOUSE Transmembrane 9 superfamily member OS=Mus musculus OX=10090 GN=Tm9sf3 PE=1 SV=1;tr|Q571B0|Q571B0_MOUSE Transmembrane 9 sup	5	4	4	8.3	56.252	484	27.539	2.3	8.3	25925000	196960000	7.5973
Q6NWW1;Q80TU3;A0A571BD95;A0A5F8MP95;Q9ES00;G3UZD6;H7BXC2	Ubiquitination factor E4B, UFD2 homolog (S. cerevisiae)	Ube4b	tr|Q6NWW1|Q6NWW1_MOUSE Ubiquitination factor E4B, UFD2 homolog (S. cerevisiae) OS=Mus musculus OX=10090 GN=Ube4b PE=2 SV=1;tr|Q80TU3|Q80TU3_MOUSE MKIAA0684 protein (Fragment) OS=Mus musculus OX=10090 GN=mKIAA0684 PE=2 SV=1;tr|A0A571BD95|A0A571BD95_MOUSE Ub	7	4	4	3.8	133.31	1173	27.638	3.8	1.1	97042000	5972800	0.0615486
A0A668KL51;Q91VA7	Isocitrate dehydrogenase [NAD] subunit, mitochondrial	Idh3b	tr|A0A668KL51|A0A668KL51_MOUSE Isocitrate dehydrogenase [NAD] subunit, mitochondrial OS=Mus musculus OX=10090 GN=Idh3b PE=1 SV=1;tr|Q91VA7|Q91VA7_MOUSE Isocitrate dehydrogenase [NAD] subunit, mitochondrial OS=Mus musculus OX=10090 GN=Idh3b PE=1 SV=1	2	4	4	11.3	41.7	380	25.083	11.3	11.3	154310000	337400000	2.18651
Q790S0;Q8K4W7;Q8K4W8;Q6PGA5;Q3TTK0;Q8K4W9;A0A6Q6Q7B9;E9Q2I1;P51791;Q6PEV2;Q3UEX5	Chloride channel protein	Clcn3	tr|Q790S0|Q790S0_MOUSE Chloride channel protein OS=Mus musculus OX=10090 GN=Clcn3 PE=1 SV=1;tr|Q8K4W7|Q8K4W7_MOUSE Chloride channel protein (Fragment) OS=Mus musculus OX=10090 GN=Clcn3 PE=3 SV=1;tr|Q8K4W8|Q8K4W8_MOUSE Chloride channel protein OS=Mus muscul	11	4	4	5.9	84.474	760	24.874	4.7	4.9	31726000	62949000	1.98415
E9QAE3;A0ZVB6;Q52KH4;Q8BTS9	B-TFIID TATA-box-binding protein-associated factor 1	Btaf1	tr|E9QAE3|E9QAE3_MOUSE B-TFIID TATA-box-binding protein-associated factor 1 OS=Mus musculus OX=10090 GN=Btaf1 PE=1 SV=1;tr|A0ZVB6|A0ZVB6_MOUSE TBP-associated factor 170 OS=Mus musculus OX=10090 GN=Btaf1 PE=2 SV=1;tr|Q52KH4|Q52KH4_MOUSE Btaf1 protein (Fragm	4	4	4	3.1	207.05	1848	26.084	3.1	3.1	36808000	62717000	1.7039
A2A5N2;Q9CQV8;A2A5N1;Q9JJ20;O70456;D3YW45	Tyrosine 3-monooxygenase/tryptophan 5-monooxygenase activation protein, beta polypeptide	Ywhab	tr|A2A5N2|A2A5N2_MOUSE Tyrosine 3-monooxygenase/tryptophan 5-monooxygenase activation protein, beta polypeptide OS=Mus musculus OX=10090 GN=Ywhab PE=2 SV=1;sp|Q9CQV8|1433B_MOUSE 14-3-3 protein beta/alpha OS=Mus musculus OX=10090 GN=Ywhab PE=1 SV=3;tr|A2A5N	6	9	4	40.7	28.086	246	41.29	37.8	40.7	438950000	262510000	0.598041
A2A813;Q99LX0;A2A815;D3K2X3;A2A817;A2A816	Maillard deglycase (EC 3.5.1.124) (Parkinsonism-associated deglycase) (Protein DJ-1) (Protein/nucleic acid deglycase DJ-1)	Park7	tr|A2A813|A2A813_MOUSE Maillard deglycase OS=Mus musculus OX=10090 GN=Park7 PE=1 SV=1;sp|Q99LX0|PARK7_MOUSE Parkinson disease protein 7 homolog OS=Mus musculus OX=10090 GN=Park7 PE=1 SV=1;tr|A2A815|A2A815_MOUSE Maillard deglycase (Fragment) OS=Mus musculus	6	4	4	33.1	18.474	175	40.502	33.1	25.1	194030000	99414000	0.512364
A2AAN2;Q8BMA6;Q8K258	Signal recognition particle subunit SRP68 (SRP68)	Srp68	tr|A2AAN2|A2AAN2_MOUSE Signal recognition particle subunit SRP68 OS=Mus musculus OX=10090 GN=Srp68 PE=1 SV=1;sp|Q8BMA6|SRP68_MOUSE Signal recognition particle subunit SRP68 OS=Mus musculus OX=10090 GN=Srp68 PE=1 SV=2;tr|Q8K258|Q8K258_MOUSE Srp68 protein OS	3	4	4	11.6	65.952	587	36.452	2.2	11.6	8912600	68551000	7.69147
Q99N15;A2AFQ2;Q9CYT3;O08756	17beta-hydroxysteroid dehydrogenase type 10/short chain L-3-hydroxyacyl-CoA dehydrogenase (3-hydroxyacyl-CoA dehydrogenase type-2) (Hydroxysteroid (17-beta) dehydrogenase 10)	Hsd17b10 Hadh2 Hsd17b10/Schad	tr|Q99N15|Q99N15_MOUSE 17beta-hydroxysteroid dehydrogenase type 10/short chain L-3-hydroxyacyl-CoA dehydrogenase OS=Mus musculus OX=10090 GN=Hsd17b10 PE=1 SV=1;tr|A2AFQ2|A2AFQ2_MOUSE 3-hydroxyacyl-CoA dehydrogenase type-2 OS=Mus musculus OX=10090 GN=Hsd17b	4	4	4	22.6	27.273	261	29.061	22.6	22.6	66448000	116100000	1.74723
B9EJ97;A2AG68;Q64430;A0A1B4Z9K1	P-type Cu(+) transporter (EC 7.2.2.8)	Atp7a	tr|B9EJ97|B9EJ97_MOUSE P-type Cu(+) transporter OS=Mus musculus OX=10090 GN=Atp7a PE=2 SV=1;tr|A2AG68|A2AG68_MOUSE P-type Cu(+) transporter OS=Mus musculus OX=10090 GN=Atp7a PE=1 SV=1;sp|Q64430|ATP7A_MOUSE Copper-transporting ATPase 1 OS=Mus musculus OX=10	4	4	4	3.7	161.98	1492	26.112	2.9	3.7	45583000	99636000	2.18581
Q8BK51;A2AIW9;Q3UDE0;Q3TY06;Q3TTM6;Q9DC61	Alpha-MPP (Inactive zinc metalloprotease alpha) (Mitochondrial-processing peptidase subunit alpha)	Pmpca	tr|Q8BK51|Q8BK51_MOUSE Alpha-MPP OS=Mus musculus OX=10090 GN=Pmpca PE=2 SV=1;tr|A2AIW9|A2AIW9_MOUSE Alpha-MPP OS=Mus musculus OX=10090 GN=Pmpca PE=1 SV=1;tr|Q3UDE0|Q3UDE0_MOUSE Alpha-MPP (Fragment) OS=Mus musculus OX=10090 GN=Pmpca PE=2 SV=1;tr|Q3TY06|Q3TY	6	4	4	8.8	48.454	441	23.742	8.8	0	93009000	0	0
E9PXE6;F8VPR2;A2AQW2;A2APV2;Q6P247;D3Z7A7;Q6ZPF4;Q8BI52	Formin-like protein 2	Fmnl2	tr|E9PXE6|E9PXE6_MOUSE Formin-like protein 2 OS=Mus musculus OX=10090 GN=Fmnl2 PE=1 SV=2;tr|F8VPR2|F8VPR2_MOUSE Formin-like protein 2 OS=Mus musculus OX=10090 GN=Fmnl2 PE=1 SV=1;tr|A2AQW2|A2AQW2_MOUSE Formin-like protein 2 OS=Mus musculus OX=10090 GN=Fmnl2	8	5	4	5.3	117.95	1034	27.774	5.3	3.6	50659000	44821000	0.884759
A2AQA7;Q8CFQ3	RNA helicase aquarius	Aqr	tr|A2AQA7|A2AQA7_MOUSE RNA helicase aquarius OS=Mus musculus OX=10090 GN=Aqr PE=1 SV=1;sp|Q8CFQ3|AQR_MOUSE RNA helicase aquarius OS=Mus musculus OX=10090 GN=Aqr PE=1 SV=2	2	4	4	4.1	161.85	1400	25.622	1.5	4.1	45562000	68622000	1.50612
F6VQ81;V9GWU5;Q3TUJ9;Q8BKP1;Q3TAI4;Q9CZ22;A2AUD5;Q9CYZ2	Tumor protein D54 (Fragment)	Tpd52l2	tr|F6VQ81|F6VQ81_MOUSE Tumor protein D54 (Fragment) OS=Mus musculus OX=10090 GN=Tpd52l2 PE=1 SV=1;tr|V9GWU5|V9GWU5_MOUSE Tumor protein D54 (Fragment) OS=Mus musculus OX=10090 GN=Tpd52l2 PE=1 SV=8;tr|Q3TUJ9|Q3TUJ9_MOUSE Tumor protein D54 OS=Mus musculus OX=	8	4	4	31.7	17.619	161	37.71	0	31.7	0	236850000	#DIV/0!
A2BE28	Ribosomal biogenesis protein LAS1L (Protein LAS1 homolog)	Las1l	sp|A2BE28|LAS1L_MOUSE Ribosomal biogenesis protein LAS1L OS=Mus musculus OX=10090 GN=Las1l PE=1 SV=1	1	4	4	6.3	89.413	776	39.737	0	6.3	0	180100000	#DIV/0!
A2BE93;Q5U445;Q3T9S3;Q9EQU5;A2BE92	Protein SET (Fragment)	Set	tr|A2BE93|A2BE93_MOUSE Protein SET (Fragment) OS=Mus musculus OX=10090 GN=Set PE=1 SV=1;tr|Q5U445|Q5U445_MOUSE cDNA sequence BC085271 OS=Mus musculus OX=10090 GN=BC085271 PE=2 SV=1;tr|Q3T9S3|Q3T9S3_MOUSE SET translocation OS=Mus musculus OX=10090 GN=Set PE	5	4	4	22.3	24.923	215	35.042	22.3	22.3	230380000	114370000	0.496441
Q8VCE7;A2RS96;Q9CXE7;Q3U9T7;Q3TW73;E9PXY3;D3Z615;Q8C5H9;Q3V440;E9Q2J2	Transmembrane emp24 protein transport domain containing 5	Tmed5	tr|Q8VCE7|Q8VCE7_MOUSE Transmembrane emp24 protein transport domain containing 5 OS=Mus musculus OX=10090 GN=Tmed5 PE=2 SV=1;tr|A2RS96|A2RS96_MOUSE Transmembrane emp24 domain-containing protein 5 OS=Mus musculus OX=10090 GN=Tmed5 PE=1 SV=1;sp|Q9CXE7|TMED5_	10	4	4	17	26.186	229	26.729	0	17	0	339400000	#DIV/0!
Q8C7V6;A5D6P3;O35379;Q8BRD0;Q9JL41	Uncharacterized protein (Fragment)	Abcc1	tr|Q8C7V6|Q8C7V6_MOUSE Uncharacterized protein (Fragment) OS=Mus musculus OX=10090 GN=Abcc1 PE=2 SV=1;tr|A5D6P3|A5D6P3_MOUSE ATP-binding cassette, sub-family C (CFTR/MRP), member 1 OS=Mus musculus OX=10090 GN=Abcc1 PE=1 SV=1;sp|O35379|MRP1_MOUSE Multidrug	5	4	4	5.8	88.291	796	27.848	5.8	5.8	72248000	56177000	0.777558
B1AQF4;Q9D7X3;H3BKL8;Q3V2Y9;H3BKD1	Dual specificity protein phosphatase (EC 3.1.3.16) (EC 3.1.3.48)	Dusp3	tr|B1AQF4|B1AQF4_MOUSE Dual specificity protein phosphatase OS=Mus musculus OX=10090 GN=Dusp3 PE=1 SV=1;sp|Q9D7X3|DUS3_MOUSE Dual specificity protein phosphatase 3 OS=Mus musculus OX=10090 GN=Dusp3 PE=1 SV=1;tr|H3BKL8|H3BKL8_MOUSE Dual specificity protein	5	4	4	28.6	23.223	210	28.828	22.4	28.6	52082000	193170000	3.70896
Q8BK29;B1AT82;Q9D0M1;B1AT83;B1AT84	Pribosyltran_N domain-containing protein	Prpsap1	tr|Q8BK29|Q8BK29_MOUSE Pribosyltran_N domain-containing protein OS=Mus musculus OX=10090 GN=Prpsap1 PE=2 SV=1;tr|B1AT82|B1AT82_MOUSE Phosphoribosyl pyrophosphate synthase-associated protein 1 OS=Mus musculus OX=10090 GN=Prpsap1 PE=1 SV=1;sp|Q9D0M1|KPRA_MOU	5	4	4	17.7	39.44	356	33.177	17.7	10.4	164580000	45953000	0.279214
B1AU76;B1AU75;Q99MD9;Q3TTH5	Nuclear autoantigenic sperm protein	Nasp	tr|B1AU76|B1AU76_MOUSE Nuclear autoantigenic sperm protein OS=Mus musculus OX=10090 GN=Nasp PE=1 SV=1;tr|B1AU75|B1AU75_MOUSE Nuclear autoantigenic sperm protein OS=Mus musculus OX=10090 GN=Nasp PE=1 SV=1;sp|Q99MD9|NASP_MOUSE Nuclear autoantigenic sperm pro	4	4	4	11.4	48.765	448	22.324	11.4	9.8	22799000	32004000	1.40375
Q3TWM9;Q3UAS4;Q3UE29;E9PZ00;Q3TXJ0;Q8BFQ1;Q3U8C4;Q3U897;Q3U825;Q3U5W2;Q3TXP9;Q3TWL8;Q3TWE9;Q3TKB2;Q3TIT5;Q3TID4;K3W4L3;B2RUD7;Q3UFE8;J3QPG5;Q61207;Q3TWF9;Q3TKK3	Uncharacterized protein (Fragment)	Psap	tr|Q3TWM9|Q3TWM9_MOUSE Uncharacterized protein (Fragment) OS=Mus musculus OX=10090 GN=Psap PE=2 SV=1;tr|Q3UAS4|Q3UAS4_MOUSE Uncharacterized protein OS=Mus musculus OX=10090 GN=Psap PE=2 SV=1;tr|Q3UE29|Q3UE29_MOUSE Uncharacterized protein OS=Mus musculus OX	23	4	4	9.3	58.298	527	34.289	2.8	9.3	11433000	497840000	43.5441
B2RXQ8;Q8BFQ4;A0A1L1SRB6	WD repeat domain containing 82	Wdr82	tr|B2RXQ8|B2RXQ8_MOUSE WD repeat domain containing 82 OS=Mus musculus OX=10090 GN=Wdr82 PE=1 SV=1;sp|Q8BFQ4|WDR82_MOUSE WD repeat-containing protein 82 OS=Mus musculus OX=10090 GN=Wdr82 PE=1 SV=1	3	4	4	21.4	35.079	313	37.676	21.4	17.9	184740000	18238000	0.0987225
Q3TC82;B6DT57;P97369;A8XU21	Uncharacterized protein (Fragment)	Ncf4	tr|Q3TC82|Q3TC82_MOUSE Uncharacterized protein (Fragment) OS=Mus musculus OX=10090 GN=Ncf4 PE=2 SV=1;tr|B6DT57|B6DT57_MOUSE p40phox OS=Mus musculus OX=10090 GN=Ncf4 PE=2 SV=1;sp|P97369|NCF4_MOUSE Neutrophil cytosol factor 4 OS=Mus musculus OX=10090 GN=Ncf4	4	4	4	19.3	28.402	249	26.241	6.8	19.3	15146000	40217000	2.65529
B6ZHC7;Q80UE4;B6ZHC5;Q80UE5;Q811C0;Q811B2;B6ZHC6;Q80UE3;Q3UNQ6;B6ZHD0;O70318;Q8C928;Q8BSR4;A0A1W2P6H2;Q9EPM7;A0A1W2P7I2;Q9EPM8;A0A1W2P8C0;Q7TPN6;Q8CGJ6;A0A1W2P6I5	Erythrocyte protein band 4.1-like 2	Epb41l2 Epb4.1l2	tr|B6ZHC7|B6ZHC7_MOUSE Erythrocyte protein band 4.1-like 2 OS=Mus musculus OX=10090 GN=Epb41l2 PE=2 SV=1;tr|Q80UE4|Q80UE4_MOUSE Band 4.1-like protein 2 OS=Mus musculus OX=10090 GN=Epb41l2 PE=1 SV=1;tr|B6ZHC5|B6ZHC5_MOUSE Erythrocyte protein band 4.1-like 2	21	4	4	8.1	87.311	781	33.555	8.1	8.1	48050000	117500000	2.44537
Q569Y6;B7ZBY7;E9PY39;Q9CZY3;Q4VBX4;Q9D2M8;A6X925;B7ZBY6;B2KF55	Ubiquitin-conjugating enzyme E2 variant 1	Ube2v1	tr|Q569Y6|Q569Y6_MOUSE Ubiquitin-conjugating enzyme E2 variant 1 OS=Mus musculus OX=10090 GN=Ube2v1 PE=2 SV=1;tr|B7ZBY7|B7ZBY7_MOUSE Ubiquitin-conjugating enzyme E2 variant 1 OS=Mus musculus OX=10090 GN=Ube2v1 PE=4 SV=1;tr|E9PY39|E9PY39_MOUSE Predicted gen	9	4	4	28.6	16.355	147	26.732	28.6	17.7	296300000	196360000	0.662707
B7ZP20;Q810B6	Ankyrin repeat and FYVE domain containing 1	Ankfy1	tr|B7ZP20|B7ZP20_MOUSE Ankyrin repeat and FYVE domain containing 1 OS=Mus musculus OX=10090 GN=Ankfy1 PE=2 SV=1;sp|Q810B6|ANFY1_MOUSE Rabankyrin-5 OS=Mus musculus OX=10090 GN=Ankfy1 PE=1 SV=2	2	4	4	5.8	128.64	1169	25.436	5.8	5.8	37774000	40746000	1.07868
D3YWT0;D3Z569;D3YTS1;Q9R0P6;Q6PET3	Signal peptidase complex catalytic subunit SEC11 (EC 3.4.21.89)	Sec11a	tr|D3YWT0|D3YWT0_MOUSE Signal peptidase complex catalytic subunit SEC11 OS=Mus musculus OX=10090 GN=Sec11a PE=1 SV=1;tr|D3Z569|D3Z569_MOUSE Signal peptidase complex catalytic subunit SEC11 OS=Mus musculus OX=10090 GN=Sec11a PE=1 SV=1;tr|D3YTS1|D3YTS1_MOUSE	5	4	4	20.6	19.569	170	28.04	0	20.6	0	196100000	#DIV/0!
D3YWF6;Q7TQI3;D3Z7K0	Ubiquitinyl hydrolase 1 (EC 3.4.19.12)	Otub1	tr|D3YWF6|D3YWF6_MOUSE Ubiquitinyl hydrolase 1 OS=Mus musculus OX=10090 GN=Otub1 PE=1 SV=1;sp|Q7TQI3|OTUB1_MOUSE Ubiquitin thioesterase OTUB1 OS=Mus musculus OX=10090 GN=Otub1 PE=1 SV=2;tr|D3Z7K0|D3Z7K0_MOUSE Ubiquitinyl hydrolase 1 (Fragment) OS=Mus muscu	3	4	4	23.7	28.036	241	29.81	23.7	23.7	132330000	58943000	0.445424
D3YX34;Q3TB96;Q3T9V8;E9Q586;Q6NZM3;E9Q3M3;O08788;Q3TRF1	Dynactin subunit 1	Dctn1	tr|D3YX34|D3YX34_MOUSE Dynactin subunit 1 OS=Mus musculus OX=10090 GN=Dctn1 PE=1 SV=1;tr|Q3TB96|Q3TB96_MOUSE Dynactin subunit 1 OS=Mus musculus OX=10090 GN=Dctn1 PE=2 SV=1;tr|Q3T9V8|Q3T9V8_MOUSE Dynactin subunit 1 OS=Mus musculus OX=10090 GN=Dctn1 PE=2 SV=	8	4	4	4.1	126.82	1142	26.504	4.1	2.3	44933000	26607000	0.592148
D3YZJ1;Q64337	Sequestosome-1	Sqstm1	tr|D3YZJ1|D3YZJ1_MOUSE Sequestosome-1 OS=Mus musculus OX=10090 GN=Sqstm1 PE=1 SV=1;sp|Q64337|SQSTM_MOUSE Sequestosome-1 OS=Mus musculus OX=10090 GN=Sqstm1 PE=1 SV=1	2	4	4	18.3	41.683	382	40.813	3.1	18.3	40120000	300950000	7.50125
D3Z3B8;Q3UP61;H7BWY4;E9Q9H0;Q811D0;S4R2T8;Q571K0;Q3TPP5;F6UDT8;A0A2L2P595;D3YWU0;A2BEF2;D3YUZ8;Q52KF7;A2BEE9;A0A2L2P590;E9Q2L2;A0A571BEK3;A0A571BEZ4;Q80TH1;A0A338P6J0;P70175;Q91XM9	Disks large homolog 1	Dlg1	tr|D3Z3B8|D3Z3B8_MOUSE Disks large homolog 1 OS=Mus musculus OX=10090 GN=Dlg1 PE=1 SV=1;tr|Q3UP61|Q3UP61_MOUSE Uncharacterized protein OS=Mus musculus OX=10090 GN=Dlg1 PE=2 SV=1;tr|H7BWY4|H7BWY4_MOUSE Disks large homolog 1 OS=Mus musculus OX=10090 GN=Dlg1	23	4	4	6.4	91.622	834	28.535	4.9	5.2	58536000	33920000	0.579472
D3Z7C6;Q9CRH1;Q3TJG6;Q9R0Q7	Prostaglandin E synthase 3	Ptges3	tr|D3Z7C6|D3Z7C6_MOUSE Prostaglandin E synthase 3 OS=Mus musculus OX=10090 GN=Ptges3 PE=1 SV=1;tr|Q9CRH1|Q9CRH1_MOUSE CS domain-containing protein OS=Mus musculus OX=10090 GN=Ptges3 PE=2 SV=2;tr|Q3TJG6|Q3TJG6_MOUSE CS domain-containing protein OS=Mus muscu	4	4	4	34.6	14.982	130	29.039	34.6	34.6	333540000	456570000	1.36886
D3Z7P3;D3Z7P4	Glutaminase kidney isoform, mitochondrial (GLS) (EC 3.5.1.2) [Cleaved into: Glutaminase kidney isoform, mitochondrial 68 kDa chain; Glutaminase kidney isoform, mitochondrial 65 kDa chain]	Gls Gls1 Kiaa0838	sp|D3Z7P3|GLSK_MOUSE Glutaminase kidney isoform, mitochondrial OS=Mus musculus OX=10090 GN=Gls PE=1 SV=1;tr|D3Z7P4|D3Z7P4_MOUSE Glutaminase OS=Mus musculus OX=10090 GN=Gls PE=1 SV=1	2	4	4	9.8	73.963	674	38.566	3.7	9.8	83766000	301740000	3.60218
E0CZ72;P28740;F8VQ42;Q9D481	Kinesin-like protein	Kif2a	tr|E0CZ72|E0CZ72_MOUSE Kinesin-like protein OS=Mus musculus OX=10090 GN=Kif2a PE=1 SV=1;sp|P28740|KIF2A_MOUSE Kinesin-like protein KIF2A OS=Mus musculus OX=10090 GN=Kif2a PE=1 SV=2;tr|F8VQ42|F8VQ42_MOUSE Kinesin-like protein (Fragment) OS=Mus musculus OX=1	4	4	4	5.1	83.86	743	25.239	1.5	5.1	6089600	92836000	15.245
Q6PEV0;E9PWK1;Q8K2W5;Q9D379;F6YTS6	Epoxide hydrolase (EC 3.3.2.9)	Ephx1	tr|Q6PEV0|Q6PEV0_MOUSE Epoxide hydrolase OS=Mus musculus OX=10090 GN=Ephx1 PE=2 SV=1;tr|E9PWK1|E9PWK1_MOUSE Epoxide hydrolase OS=Mus musculus OX=10090 GN=Ephx1 PE=1 SV=1;tr|Q8K2W5|Q8K2W5_MOUSE Epoxide hydrolase OS=Mus musculus OX=10090 GN=Ephx1 PE=2 SV=1;s	5	4	4	14.3	50.96	441	21.61	5.7	14.3	32807000	34446000	1.04996
E9PYK3	Protein mono-ADP-ribosyltransferase PARP4 (EC 2.4.2.-) (ADP-ribosyltransferase diphtheria toxin-like 4) (ARTD4) (Poly [ADP-ribose] polymerase 4) (PARP-4) (Vault poly(ADP-ribose) polymerase) (VPARP) (mVparp)	Parp4 Kiaa0177	sp|E9PYK3|PARP4_MOUSE Protein mono-ADP-ribosyltransferase PARP4 OS=Mus musculus OX=10090 GN=Parp4 PE=1 SV=1	1	4	4	3.3	216.13	1969	24.618	3.3	1.4	55592000	12608000	0.226795
E9PYT3;Q91YH5;A0A494BAX8;A0A494BAU1	Atlastin-3	Atl3	tr|E9PYT3|E9PYT3_MOUSE Atlastin-3 OS=Mus musculus OX=10090 GN=Atl3 PE=1 SV=1;sp|Q91YH5|ATLA3_MOUSE Atlastin-3 OS=Mus musculus OX=10090 GN=Atl3 PE=1 SV=1;tr|A0A494BAX8|A0A494BAX8_MOUSE Atlastin-3 (Fragment) OS=Mus musculus OX=10090 GN=Atl3 PE=1 SV=1	4	4	4	11.4	60.231	536	27.865	4.1	11.4	21016000	212430000	10.108
Q8C2A3;E9Q9F5;E9Q1G8;O55131;Q5DTS3;Q3UNN1;Q8C752;A0A0R4J233;S4R2P6;A0A1W2P6J7;Q9DA97;Q8C650	Septin	Septin7 Sept7	tr|Q8C2A3|Q8C2A3_MOUSE Septin OS=Mus musculus OX=10090 GN=Septin7 PE=2 SV=1;tr|E9Q9F5|E9Q9F5_MOUSE Septin OS=Mus musculus OX=10090 GN=Septin7 PE=1 SV=2;tr|E9Q1G8|E9Q1G8_MOUSE Septin OS=Mus musculus OX=10090 GN=Septin7 PE=1 SV=2;sp|O55131|SEPT7_MOUSE Septin	12	4	4	12.2	48.754	418	29.084	12.2	9.3	86585000	60067000	0.693734
E9Q242;Q3TMB8;P54822;E9Q3T7;A0A0G2JFI8;E9Q0A0;A0A140LHU1	Adenylosuccinate lyase (ASL) (EC 4.3.2.2) (Adenylosuccinase)	Adsl	tr|E9Q242|E9Q242_MOUSE Adenylosuccinate lyase OS=Mus musculus OX=10090 GN=Adsl PE=1 SV=1;tr|Q3TMB8|Q3TMB8_MOUSE Adenylosuccinate lyase OS=Mus musculus OX=10090 GN=Adsl PE=2 SV=1;sp|P54822|PUR8_MOUSE Adenylosuccinate lyase OS=Mus musculus OX=10090 GN=Adsl P	7	4	4	12.8	53.13	469	30.536	12.8	12.8	255480000	93272000	0.365085
E9Q912;Q8BKH0;A0A0G2JGC8;A0A0G2JF70;Q3TYN8	Rap1 GTPase-GDP dissociation stimulator 1	Rap1gds1	sp|E9Q912|GDS1_MOUSE Rap1 GTPase-GDP dissociation stimulator 1 OS=Mus musculus OX=10090 GN=Rap1gds1 PE=2 SV=1;tr|Q8BKH0|Q8BKH0_MOUSE Uncharacterized protein OS=Mus musculus OX=10090 PE=2 SV=1;tr|A0A0G2JGC8|A0A0G2JGC8_MOUSE RAP1, GTP-GDP dissociation stimul	5	4	4	8.2	66.076	607	26.822	8.2	6.6	48815000	39153000	0.802069
E9QAT4;Q8K000;F7BPW6;Q8R336	Protein transport protein Sec16A (SEC16 homolog A) (p250)	Sec16a Kiaa0310 Sec16	sp|E9QAT4|SC16A_MOUSE Protein transport protein Sec16A OS=Mus musculus OX=10090 GN=Sec16a PE=1 SV=1;tr|Q8K000|Q8K000_MOUSE Sec16a protein (Fragment) OS=Mus musculus OX=10090 GN=Sec16a PE=2 SV=2;tr|F7BPW6|F7BPW6_MOUSE Protein transport protein sec16 (Fragme	4	4	4	2.4	254.2	2357	28.809	2.4	1.5	52178000	64989000	1.24552
F8WJK8;Q3U9V1;Q3U8D2;Q3U3N7;Q99L47;E9Q1V0;Q3TGW8;E9Q1X9	Hsc70-interacting protein	St13	tr|F8WJK8|F8WJK8_MOUSE Hsc70-interacting protein OS=Mus musculus OX=10090 GN=St13 PE=1 SV=1;tr|Q3U9V1|Q3U9V1_MOUSE TPR_REGION domain-containing protein OS=Mus musculus OX=10090 GN=St13 PE=2 SV=1;tr|Q3U8D2|Q3U8D2_MOUSE TPR_REGION domain-containing protein O	8	4	4	13.5	40.538	362	29.605	13.5	6.4	241800000	67647000	0.279764
G3X957;O35711;A0A668KLV7	Liprin-beta-2	Ppfibp2	tr|G3X957|G3X957_MOUSE Liprin-beta-2 OS=Mus musculus OX=10090 GN=Ppfibp2 PE=1 SV=1;sp|O35711|LIPB2_MOUSE Liprin-beta-2 OS=Mus musculus OX=10090 GN=Ppfibp2 PE=1 SV=3	3	4	4	6.3	98.652	882	31.021	3.2	6.3	43676000	47713000	1.09243
G5E8V9;A2RSX9;E9Q3G5;Q3TVE1;E9QAY5	ADP-ribosylation factor-interacting protein 1	Arfip1	tr|G5E8V9|G5E8V9_MOUSE ADP-ribosylation factor-interacting protein 1 OS=Mus musculus OX=10090 GN=Arfip1 PE=1 SV=1;tr|A2RSX9|A2RSX9_MOUSE ADP-ribosylation factor interacting protein 1 OS=Mus musculus OX=10090 GN=Arfip1 PE=1 SV=1;tr|E9Q3G5|E9Q3G5_MOUSE ADP-r	5	4	4	13.4	41.518	373	26.526	6.2	10.2	42744000	56563000	1.3233
H6TMF6;H6TMF5;P68181;A0A0G2JFT9;P05132;J9JDU9	cAMP-dependent protein kinase catalytic subunit beta transcript variant 6 (Fragment)	Prkacb	tr|H6TMF6|H6TMF6_MOUSE cAMP-dependent protein kinase catalytic subunit beta transcript variant 6 (Fragment) OS=Mus musculus OX=10090 GN=Prkacb PE=2 SV=1;tr|H6TMF5|H6TMF5_MOUSE cAMP-dependent protein kinase catalytic subunit beta (Fragment) OS=Mus musculus	6	4	4	21.5	20.336	172	28.266	21.5	12.2	183930000	54387000	0.295694
Q3UC82;Q3U1F0;Q80ZH7;K4DI59;P97386;Q3U0I5;B1AT03;G3UYI8;Q3TJN5	DNA ligase (EC 6.5.1.1)	Lig3	tr|Q3UC82|Q3UC82_MOUSE DNA ligase OS=Mus musculus OX=10090 GN=Lig3 PE=1 SV=1;tr|Q3U1F0|Q3U1F0_MOUSE DNA ligase OS=Mus musculus OX=10090 GN=Lig3 PE=2 SV=1;tr|Q80ZH7|Q80ZH7_MOUSE DNA ligase OS=Mus musculus OX=10090 GN=Lig3 PE=1 SV=1;tr|K4DI59|K4DI59_MOUSE DN	9	4	4	3.9	112.71	1011	21.476	2.9	3.9	26245000	71092000	2.70878
O08553	Dihydropyrimidinase-related protein 2 (DRP-2) (Unc-33-like phosphoprotein 2) (ULIP-2)	Dpysl2 Crmp2 Ulip2	sp|O08553|DPYL2_MOUSE Dihydropyrimidinase-related protein 2 OS=Mus musculus OX=10090 GN=Dpysl2 PE=1 SV=2	1	4	4	10.3	62.277	572	29.888	10.3	7.2	148410000	116080000	0.782158
O08583;Q4KL64;G3X9I4;D9J342;Q9JJW6	THO complex subunit 4 (Tho4) (Ally of AML-1 and LEF-1) (Aly/REF export factor) (REF1-I) (RNA and export factor-binding protein 1) (Transcriptional coactivator Aly/REF)	Alyref Aly Ref1 Refbp1 THOC4	sp|O08583|THOC4_MOUSE THO complex subunit 4 OS=Mus musculus OX=10090 GN=Alyref PE=1 SV=3	5	4	4	25.5	26.94	255	63.159	4.3	25.5	18303000	512810000	28.0178
Q58E49;O09106	Histone deacetylase (EC 3.5.1.98)	Hdac1	tr|Q58E49|Q58E49_MOUSE Histone deacetylase OS=Mus musculus OX=10090 GN=Hdac1 PE=2 SV=1;sp|O09106|HDAC1_MOUSE Histone deacetylase 1 OS=Mus musculus OX=10090 GN=Hdac1 PE=1 SV=1	2	6	4	23.7	55.074	482	43.048	23.7	23.7	314400000	115350000	0.366889
O35218;Q3URN8;Q3UGU6;Q3US33;Q8C6K6	Cleavage and polyadenylation specificity factor subunit 2 (Cleavage and polyadenylation specificity factor 100 kDa subunit) (CPSF 100 kDa subunit)	Cpsf2 Cpsf100 Mcpsf	sp|O35218|CPSF2_MOUSE Cleavage and polyadenylation specificity factor subunit 2 OS=Mus musculus OX=10090 GN=Cpsf2 PE=1 SV=1;tr|Q3URN8|Q3URN8_MOUSE Cleavage and polyadenylation specificity factor subunit 2 (Fragment) OS=Mus musculus OX=10090 GN=Cpsf2 PE=2 S	5	4	4	5.6	88.382	782	31.813	4.7	4.5	47480000	61071000	1.28625
Q9CY29;Q3ULG4;O35226	26S proteasome non-ATPase regulatory subunit 4	Psmd4	tr|Q9CY29|Q9CY29_MOUSE 26S proteasome non-ATPase regulatory subunit 4 OS=Mus musculus OX=10090 GN=Psmd4 PE=2 SV=1;tr|Q3ULG4|Q3ULG4_MOUSE 26S proteasome non-ATPase regulatory subunit 4 OS=Mus musculus OX=10090 GN=Psmd4 PE=2 SV=1;sp|O35226|PSMD4_MOUSE 26S pr	3	4	4	21.1	40.042	370	28.427	21.1	21.1	307630000	220660000	0.71729
Q69ZD1;O35382;Q8CAQ9;Q8C391;Q9CXE1;Q8CEG7;Q8CA11;Q9CWI0	Exocyst complex component Sec8 (Fragment)	Exoc4 mKIAA1699 Sec8l1	tr|Q69ZD1|Q69ZD1_MOUSE Exocyst complex component Sec8 (Fragment) OS=Mus musculus OX=10090 GN=Exoc4 PE=2 SV=1;sp|O35382|EXOC4_MOUSE Exocyst complex component 4 OS=Mus musculus OX=10090 GN=Exoc4 PE=1 SV=2;tr|Q8CAQ9|Q8CAQ9_MOUSE Exocyst complex component Sec8	8	4	4	5.3	110.77	977	27.206	3.2	5.3	24627000	41238000	1.6745
O35490;Q3UEP0;Q91WS4	Betaine--homocysteine S-methyltransferase 1 (EC 2.1.1.5)	Bhmt	sp|O35490|BHMT1_MOUSE Betaine--homocysteine S-methyltransferase 1 OS=Mus musculus OX=10090 GN=Bhmt PE=1 SV=1;tr|Q3UEP0|Q3UEP0_MOUSE Hcy-binding domain-containing protein OS=Mus musculus OX=10090 PE=2 SV=1	3	4	4	11.3	45.02	407	28.74	8.8	11.3	41048000	366250000	8.92248
Q5SVG5;Q5SVG4;Q3TVN4;Q8CC13;O35643;Q3U1K9;Q6NXY3;Q5SWR0	AP complex subunit beta	Ap1b1	tr|Q5SVG5|Q5SVG5_MOUSE AP complex subunit beta OS=Mus musculus OX=10090 GN=Ap1b1 PE=1 SV=1;tr|Q5SVG4|Q5SVG4_MOUSE AP complex subunit beta OS=Mus musculus OX=10090 GN=Ap1b1 PE=1 SV=1;tr|Q3TVN4|Q3TVN4_MOUSE AP complex subunit beta OS=Mus musculus OX=10090 GN	8	17	4	21.7	101.19	916	28.244	21.7	18.6	60367000	40920000	0.677854
Q3TUQ5;O35691;Q9CV89;A0A1W2P6S1	Pinin	Pnn	tr|Q3TUQ5|Q3TUQ5_MOUSE Pinin OS=Mus musculus OX=10090 GN=Pnn PE=1 SV=1;sp|O35691|PININ_MOUSE Pinin OS=Mus musculus OX=10090 GN=Pnn PE=1 SV=4;tr|Q9CV89|Q9CV89_MOUSE Pinin (Fragment) OS=Mus musculus OX=10090 GN=Pnn PE=2 SV=1	4	4	4	5.1	82.504	726	26.757	0	5.1	0	180050000	#DIV/0!
O54962	Barrier-to-autointegration factor (Breakpoint cluster region protein 1) (LAP2-binding protein 1) [Cleaved into: Barrier-to-autointegration factor, N-terminally processed]	Banf1 Baf Bcrp1 L2bp1	sp|O54962|BAF_MOUSE Barrier-to-autointegration factor OS=Mus musculus OX=10090 GN=Banf1 PE=1 SV=1	1	4	4	42.7	10.102	89	33.56	34.8	42.7	41486000	1606200000	38.7167
Q1PCS1;O70145;A0A087WPH0	Neutrophil cytosolic factor 2	Ncf2	tr|Q1PCS1|Q1PCS1_MUSMM Neutrophil cytosolic factor 2 OS=Mus musculus molossinus OX=57486 GN=Ncf2 PE=2 SV=1;sp|O70145|NCF2_MOUSE Neutrophil cytosol factor 2 OS=Mus musculus OX=10090 GN=Ncf2 PE=1 SV=1	3	4	4	9.3	59.457	525	27.656	7.6	9.3	44398000	171610000	3.86526
Q9JMJ6;Q8BH40;O70439;Q9DCE1	Syntaxin 7	Stx7	tr|Q9JMJ6|Q9JMJ6_MOUSE Syntaxin 7 OS=Mus musculus OX=10090 GN=Stx7 PE=2 SV=1;tr|Q8BH40|Q8BH40_MOUSE Syntaxin-7 OS=Mus musculus OX=10090 GN=Stx7 PE=1 SV=1;sp|O70439|STX7_MOUSE Syntaxin-7 OS=Mus musculus OX=10090 GN=Stx7 PE=1 SV=3;tr|Q9DCE1|Q9DCE1_MOUSE t-SN	4	4	4	22.2	29.766	261	59.062	22.2	22.2	224640000	357480000	1.59135
O88983;Q9D0J1;Q8BS59	Syntaxin-8 (Syntaxin-like protein 3I35)	Stx8	sp|O88983|STX8_MOUSE Syntaxin-8 OS=Mus musculus OX=10090 GN=Stx8 PE=1 SV=1;tr|Q9D0J1|Q9D0J1_MOUSE Syntaxin-8 OS=Mus musculus OX=10090 GN=Stx8 PE=1 SV=1	3	4	4	25.4	26.925	236	37.794	16.9	25.4	75537000	125150000	1.6568
P05202	Aspartate aminotransferase, mitochondrial (mAspAT) (EC 2.6.1.1) (EC 2.6.1.7) (Fatty acid-binding protein) (FABP-1) (Glutamate oxaloacetate transaminase 2) (Kynurenine aminotransferase 4) (Kynurenine aminotransferase IV) (Kynurenine--oxoglutarate transaminase 4) (Kynurenine--oxoglutarate transaminase IV) (Plasma membrane-associated fatty acid-binding protein) (FABPpm) (Transaminase A)	Got2 Got-2	sp|P05202|AATM_MOUSE Aspartate aminotransferase, mitochondrial OS=Mus musculus OX=10090 GN=Got2 PE=1 SV=1	1	4	4	12.6	47.411	430	53.288	6.3	12.6	48564000	145080000	2.9874
P12382;Q8CD98;A0A1W2P7T1	ATP-dependent 6-phosphofructokinase, liver type (ATP-PFK) (PFK-L) (EC 2.7.1.11) (6-phosphofructokinase type B) (Phosphofructo-1-kinase isozyme B) (PFK-B) (Phosphohexokinase)	Pfkl Pfk-l Pfkb	sp|P12382|PFKAL_MOUSE ATP-dependent 6-phosphofructokinase, liver type OS=Mus musculus OX=10090 GN=Pfkl PE=1 SV=4	3	6	4	11.5	85.359	780	50.672	11.5	10.4	249660000	181920000	0.728671
Q3V2F7;P12710	Fatty acid-binding protein 1 (Fatty acid-binding protein, liver) (Liver-type fatty acid-binding protein)	Fabp1	tr|Q3V2F7|Q3V2F7_MOUSE Fatty acid-binding protein 1 OS=Mus musculus OX=10090 GN=Fabp1 PE=1 SV=1;sp|P12710|FABPL_MOUSE Fatty acid-binding protein, liver OS=Mus musculus OX=10090 GN=Fabp1 PE=1 SV=2	2	4	4	40.2	14.245	127	26.227	16.5	40.2	15112000	300890000	19.9107
Q63836;P17563;A0A0R4J135;D6RHN2;G3UWK0;G3UYY2;G3UZT2	Selenium-binding protein 2 (56 kDa acetaminophen-binding protein) (AP56)	Selenbp2 Lpsb2	sp|Q63836|SBP2_MOUSE Selenium-binding protein 2 OS=Mus musculus OX=10090 GN=Selenbp2 PE=1 SV=2;sp|P17563|SBP1_MOUSE Methanethiol oxidase OS=Mus musculus OX=10090 GN=Selenbp1 PE=1 SV=2;tr|A0A0R4J135|A0A0R4J135_MOUSE Selenium-binding protein 2 OS=Mus musculu	7	4	4	9.5	52.609	472	26.943	9.5	7.4	82297000	90834000	1.10373
Q3U2J2;Q3TD17;P17809;Q8BTM5	Glucose transporter type 1, erythrocyte/brain (Solute carrier family 2, facilitated glucose transporter member 1)	Slc2a1	tr|Q3U2J2|Q3U2J2_MOUSE Glucose transporter type 1, erythrocyte/brain OS=Mus musculus OX=10090 GN=Slc2a1 PE=2 SV=1;tr|Q3TD17|Q3TD17_MOUSE Glucose transporter type 1, erythrocyte/brain OS=Mus musculus OX=10090 GN=Slc2a1 PE=2 SV=1;sp|P17809|GTR1_MOUSE Solute	4	4	4	8.7	54.07	492	39.076	8.7	8.7	1029300000	595770000	0.578811
Q5M9M0;P19253;A0A1B0GSB2;A0A1B0GSQ6;A0A1B0GTA1;A0A1B0GS68;Q3TDS9;A0A1B0GQW6;A0A1B0GSL5;A0A1B0GSC2;A0A1B0GRH1;A0A1B0GSF0;A0A1B0GT00	60S ribosomal protein L13a	Rpl13a	tr|Q5M9M0|Q5M9M0_MOUSE 60S ribosomal protein L13a OS=Mus musculus OX=10090 GN=Rpl13a PE=1 SV=1;sp|P19253|RL13A_MOUSE 60S ribosomal protein L13a OS=Mus musculus OX=10090 GN=Rpl13a PE=1 SV=4;tr|A0A1B0GSB2|A0A1B0GSB2_MOUSE 60S ribosomal protein L13a OS=Mus mu	13	4	4	16.7	23.464	203	30.417	16.7	16.7	75161000	1099900000	14.6339
Q544Y8;Q3TX66;Q3TWT4;Q3TVQ3;Q3U9K2;Q9D2V3;Q3UD85;Q3UAJ3;Q3U9N4;Q3U8W3;Q3U5Q6;Q3TW77;P28798;H3BJE0;Q3UC19;H3BJ90;Q3UDD6	Granulin	Grn	tr|Q544Y8|Q544Y8_MOUSE Granulin OS=Mus musculus OX=10090 GN=Grn PE=2 SV=1;tr|Q3TX66|Q3TX66_MOUSE Uncharacterized protein OS=Mus musculus OX=10090 GN=Grn PE=2 SV=1;tr|Q3TWT4|Q3TWT4_MOUSE Uncharacterized protein OS=Mus musculus OX=10090 GN=Grn PE=2 SV=1;tr|Q	17	4	4	9.7	63.458	589	31.533	7	9.7	55710000	633870000	11.378
Q9JJE1;Q3UK05;Q3U3F4;Q3TMJ8;P31938;Q3TMW4	Brain cDNA, clone MNCb-1208, similar to Mus musculus mitogen activated protein kinase kinase 1 (Map2k1), mRNA	Map2k1	tr|Q9JJE1|Q9JJE1_MOUSE Brain cDNA, clone MNCb-1208, similar to Mus musculus mitogen activated protein kinase kinase 1 (Map2k1), mRNA OS=Mus musculus OX=10090 GN=Map2k1 PE=2 SV=1;tr|Q3UK05|Q3UK05_MOUSE Protein kinase domain-containing protein OS=Mus musculu	6	7	4	18.8	43.374	393	50.852	18.8	13.7	168840000	188360000	1.11561
Q5J7N1;Q3U2W7;Q0VDV7;P32883;Q71SW8;P97870;C0H5X4;A0A0G2JE25;A0A0G2JGP4;Q9D091;Q3UCX0;Q4FJP3;Q61411;P08556;A0A0G2JGM2;Q9R0B8;Q3TMF4;B2KGV5;Q9QWR5;Q53WZ3;Q675B0;E9Q8V2;E9PVD5;A0A0N4SVY1	Kras protein (p21B)	Kras Kras2	tr|Q5J7N1|Q5J7N1_MOUSE Kras protein OS=Mus musculus OX=10090 GN=Kras PE=2 SV=1;tr|Q3U2W7|Q3U2W7_MOUSE Uncharacterized protein OS=Mus musculus OX=10090 GN=Kras PE=2 SV=1;tr|Q0VDV7|Q0VDV7_MOUSE Kras protein OS=Mus musculus OX=10090 GN=Kras PE=2 SV=1;sp|P3288	24	4	4	34	21.482	188	24.319	34	12.2	158930000	125110000	0.787202
Q3TJ39;Q8C266;P35278;Q3TCT9	Rab5C	Rab5c Rab5C	tr|Q3TJ39|Q3TJ39_MOUSE Rab5C OS=Mus musculus OX=10090 GN=Rab5c PE=1 SV=1;tr|Q8C266|Q8C266_MOUSE Ras-related protein Rab-5C OS=Mus musculus OX=10090 GN=Rab5c PE=1 SV=1;sp|P35278|RAB5C_MOUSE Ras-related protein Rab-5C OS=Mus musculus OX=10090 GN=Rab5c PE=1 S	4	6	4	36.6	23.412	216	66.692	36.6	36.6	489000000	537350000	1.09888
Q3UFJ3;P35486	Pyruvate dehydrogenase E1 component subunit alpha (EC 1.2.4.1)	Pdha1	tr|Q3UFJ3|Q3UFJ3_MOUSE Pyruvate dehydrogenase E1 component subunit alpha OS=Mus musculus OX=10090 GN=Pdha1 PE=1 SV=1;sp|P35486|ODPA_MOUSE Pyruvate dehydrogenase E1 component subunit alpha, somatic form, mitochondrial OS=Mus musculus OX=10090 GN=Pdha1 PE=1	2	4	4	10.8	43.231	390	32.52	8.5	10.8	104750000	157400000	1.50263
P43275	Histone H1.1 (H1 VAR.3) (Histone H1a) (H1a)	H1-1 H1a H1f1 Hist1h1a	sp|P43275|H11_MOUSE Histone H1.1 OS=Mus musculus OX=10090 GN=H1-1 PE=1 SV=2	1	5	4	28.6	21.785	213	55.255	8.5	28.6	3595000	658140000	183.071
Q99K08;P47857;Q1LZL7	ATP-dependent 6-phosphofructokinase (ATP-PFK) (Phosphofructokinase) (EC 2.7.1.11) (Phosphohexokinase)	Pfkm PFK-M Pfka	tr|Q99K08|Q99K08_MOUSE ATP-dependent 6-phosphofructokinase OS=Mus musculus OX=10090 GN=Pfkm PE=2 SV=1;sp|P47857|PFKAM_MOUSE ATP-dependent 6-phosphofructokinase, muscle type OS=Mus musculus OX=10090 GN=Pfkm PE=1 SV=3	3	5	4	7.9	85.302	780	23.648	4.1	6.8	49704000	38696000	0.778529
Q3TJ52;Q3UQN3;Q6NVC3;Q3U041;P54728;Q8BRA9;Q3TN85;Q8CAP3;P54726	Uncharacterized protein	Rad23b	tr|Q3TJ52|Q3TJ52_MOUSE Uncharacterized protein OS=Mus musculus OX=10090 GN=Rad23b PE=2 SV=1;tr|Q3UQN3|Q3UQN3_MOUSE UV excision repair protein RAD23 OS=Mus musculus OX=10090 GN=Rad23b PE=2 SV=1;tr|Q6NVC3|Q6NVC3_MOUSE UV excision repair protein RAD23 OS=Mus	9	4	4	10.4	34.613	327	23.375	10.4	8	256910000	68169000	0.265342
P54823	Probable ATP-dependent RNA helicase DDX6 (EC 3.6.4.13) (ATP-dependent RNA helicase p54) (DEAD box protein 6) (Oncogene RCK homolog)	Ddx6 Hlr2 Rck	sp|P54823|DDX6_MOUSE Probable ATP-dependent RNA helicase DDX6 OS=Mus musculus OX=10090 GN=Ddx6 PE=1 SV=1	1	4	4	10.8	54.191	483	29.062	10.8	8.3	133170000	93350000	0.700984
P55264;Q8BWS6;A0A286YCD7;Q8BMC5;A0A286YCN3	Adenosine kinase (AK) (EC 2.7.1.20) (Adenosine 5'-phosphotransferase)	Adk	sp|P55264|ADK_MOUSE Adenosine kinase OS=Mus musculus OX=10090 GN=Adk PE=1 SV=2;tr|Q8BWS6|Q8BWS6_MOUSE PfkB domain-containing protein (Fragment) OS=Mus musculus OX=10090 GN=Adk PE=2 SV=1;tr|A0A286YCD7|A0A286YCD7_MOUSE Adenosine kinase (Fragment) OS=Mus musc	5	4	4	12.2	40.148	361	28.888	12.2	12.2	165420000	61497000	0.371763
Q91YZ2;Q3UIX8;Q3UGL5;P56546;E9PWQ9;E9Q0T4;G3BKD4	C-terminal-binding protein 2 (Ctbp2 protein)	Ctbp2	tr|Q91YZ2|Q91YZ2_MOUSE C-terminal-binding protein 2 OS=Mus musculus OX=10090 GN=Ctbp2 PE=1 SV=1;tr|Q3UIX8|Q3UIX8_MOUSE Uncharacterized protein OS=Mus musculus OX=10090 GN=Ctbp2 PE=2 SV=1;tr|Q3UGL5|Q3UGL5_MOUSE Uncharacterized protein OS=Mus musculus OX=100	7	6	4	17.9	45.971	420	41.619	11.2	17.9	120620000	203520000	1.68728
Q3UJH5;Q3U861;P57746;Q3UK81;Q3U684;Q9CTI8	V-type proton ATPase subunit D (V-type proton ATPase subunit d) (Vacuolar proton pump subunit D)	Atp6v1d	tr|Q3UJH5|Q3UJH5_MOUSE V-type proton ATPase subunit D OS=Mus musculus OX=10090 GN=Atp6v1d PE=2 SV=1;tr|Q3U861|Q3U861_MOUSE V-type proton ATPase subunit D OS=Mus musculus OX=10090 GN=Atp6v1d PE=1 SV=1;sp|P57746|VATD_MOUSE V-type proton ATPase subunit D OS=M	6	4	4	18.6	28.355	247	34.068	9.3	18.6	39157000	581260000	14.8443
Q8C7F9;Q8C6H4;Q542E4;Q3TWB8;P58021;E9PZ69	Transmembrane 9 superfamily member	Tm9sf2	tr|Q8C7F9|Q8C7F9_MOUSE Transmembrane 9 superfamily member OS=Mus musculus OX=10090 GN=Tm9sf2 PE=2 SV=1;tr|Q8C6H4|Q8C6H4_MOUSE Transmembrane 9 superfamily member OS=Mus musculus OX=10090 GN=Tm9sf2 PE=2 SV=1;tr|Q542E4|Q542E4_MOUSE Transmembrane 9 superfamily	6	4	4	9.7	75.357	662	58.334	7.9	9.7	40451000	493760000	12.2064
Q9D3C4;Q8BVW6;Q7TPD9;P59999;Q3TX55;E9PWA7	Actin-related protein 2/3 complex subunit 4	Arpc4	tr|Q9D3C4|Q9D3C4_MOUSE Actin-related protein 2/3 complex subunit 4 OS=Mus musculus OX=10090 GN=Arpc4 PE=2 SV=1;tr|Q8BVW6|Q8BVW6_MOUSE Actin-related protein 2/3 complex subunit 4 OS=Mus musculus OX=10090 GN=Arpc4 PE=2 SV=1;tr|Q7TPD9|Q7TPD9_MOUSE Actin-relat	6	4	4	23.2	19.653	168	29.919	23.2	11.3	183350000	97876000	0.533821
Q4FJL0;P61027;Q3U621	Rab10 (Rab10 protein)	Rab10	tr|Q4FJL0|Q4FJL0_MOUSE Rab10 OS=Mus musculus OX=10090 GN=Rab10 PE=1 SV=1;sp|P61027|RAB10_MOUSE Ras-related protein Rab-10 OS=Mus musculus OX=10090 GN=Rab10 PE=1 SV=1;tr|Q3U621|Q3U621_MOUSE Uncharacterized protein OS=Mus musculus OX=10090 GN=Rab10 PE=2 SV=1	3	5	4	30	22.541	200	39.252	26.5	30	157590000	232370000	1.47452
Q3UK65;Q3V3N6;P61202;A2AQE4	COP9 signalosome complex subunit 2	Cops2	tr|Q3UK65|Q3UK65_MOUSE COP9 signalosome complex subunit 2 OS=Mus musculus OX=10090 GN=Cops2 PE=2 SV=1;tr|Q3V3N6|Q3V3N6_MOUSE COP9 signalosome complex subunit 2 OS=Mus musculus OX=10090 GN=Cops2 PE=2 SV=1;sp|P61202|CSN2_MOUSE COP9 signalosome complex subuni	4	4	4	10.6	51.609	443	28.628	10.6	3.2	92352000	23454000	0.253963
Q3TJD0;P61620;Q9CYJ6;Q9JLR1;Q3TTK6;A2ATT9	Plug_translocon domain-containing protein	Sec61a1	tr|Q3TJD0|Q3TJD0_MOUSE Plug_translocon domain-containing protein OS=Mus musculus OX=10090 GN=Sec61a1 PE=2 SV=1;sp|P61620|S61A1_MOUSE Protein transport protein Sec61 subunit alpha isoform 1 OS=Mus musculus OX=10090 GN=Sec61a1 PE=1 SV=2;tr|Q9CYJ6|Q9CYJ6_MOUS	6	4	4	6.9	52.234	476	34.982	0	6.9	0	664080000	#DIV/0!
Q542M2;P61924;Q8R3M1;A0A2R8VJV3	Coatomer subunit zeta	Copz1	tr|Q542M2|Q542M2_MOUSE Coatomer subunit zeta OS=Mus musculus OX=10090 GN=Copz1 PE=1 SV=1;sp|P61924|COPZ1_MOUSE Coatomer subunit zeta-1 OS=Mus musculus OX=10090 GN=Copz1 PE=1 SV=1;tr|Q8R3M1|Q8R3M1_MOUSE Coatomer subunit zeta OS=Mus musculus OX=10090 GN=Copz	4	4	4	33.9	20.198	177	36.575	33.9	24.9	79258000	65790000	0.830074
Q9CWI9;Q497E1;Q9CZI5;P62267;Q9CSN9	40S ribosomal protein S23	Rps23	tr|Q9CWI9|Q9CWI9_MOUSE 40S ribosomal protein S23 OS=Mus musculus OX=10090 GN=Rps23 PE=2 SV=1;tr|Q497E1|Q497E1_MOUSE 40S ribosomal protein S23 OS=Mus musculus OX=10090 GN=Rps23 PE=2 SV=1;tr|Q9CZI5|Q9CZI5_MOUSE 40S ribosomal protein S23 OS=Mus musculus OX=10	5	4	4	35	15.835	143	25.375	35	35	103180000	284360000	2.75596
P62830;A2A6F8	60S ribosomal protein L23	Rpl23	sp|P62830|RL23_MOUSE 60S ribosomal protein L23 OS=Mus musculus OX=10090 GN=Rpl23 PE=1 SV=1	2	4	4	36.4	14.865	140	55.295	36.4	36.4	353890000	1868600000	5.28017
P62869;A0A3B2WBM3;Q9D7T5	Elongin-B (EloB) (Elongin 18 kDa subunit) (RNA polymerase II transcription factor SIII subunit B) (SIII p18) (Transcription elongation factor B polypeptide 2)	Elob Tceb2	sp|P62869|ELOB_MOUSE Elongin-B OS=Mus musculus OX=10090 GN=Elob PE=1 SV=1;tr|A0A3B2WBM3|A0A3B2WBM3_MOUSE Elongin-B OS=Mus musculus OX=10090 GN=Elob PE=1 SV=1	3	4	4	34.7	13.17	118	26.63	27.1	24.6	105460000	168480000	1.59757
Q5SW18;Q3UGR6;Q3TJG1;Q3TIK0;P63005;Q3UHM0;Q3UH92;Q5SW16	Platelet-activating factor acetylhydrolase IB subunit alpha (Lissencephaly-1 protein) (LIS-1) (PAF acetylhydrolase 45 kDa subunit) (PAF-AH 45 kDa subunit) (PAF-AH alpha) (PAFAH alpha)	Pafah1b1 LIS1 PAFAH1B1	tr|Q5SW18|Q5SW18_MOUSE Platelet-activating factor acetylhydrolase IB subunit alpha OS=Mus musculus OX=10090 GN=Pafah1b1 PE=2 SV=1;tr|Q3UGR6|Q3UGR6_MOUSE Platelet-activating factor acetylhydrolase IB subunit alpha OS=Mus musculus OX=10090 GN=Pafah1b1 PE=2 S	8	4	4	16.8	46.67	410	36.061	16.8	7.6	160550000	40049000	0.249449
P63024;Q8CHR4;O35619;B0QZN5;P63044;A0A0N4SUV3;D3YTU0;Q9CXX2;Q62442	Vesicle-associated membrane protein 3 (VAMP-3) (Cellubrevin) (CEB) (Synaptobrevin-3)	Vamp3 Syb3	sp|P63024|VAMP3_MOUSE Vesicle-associated membrane protein 3 OS=Mus musculus OX=10090 GN=Vamp3 PE=1 SV=1;tr|Q8CHR4|Q8CHR4_MOUSE Synaptobrevin-2 OS=Mus musculus OX=10090 GN=Vamp2 PE=1 SV=2;tr|O35619|O35619_MOUSE Synaptobrevin-2 OS=Mus musculus OX=10090 GN=Va	9	4	4	54.4	11.48	103	28.311	54.4	54.4	233280000	382790000	1.6409
P63028;D3YU75	Translationally-controlled tumor protein (TCTP) (21 kDa polypeptide) (p21) (p23)	Tpt1 Trt	sp|P63028|TCTP_MOUSE Translationally-controlled tumor protein OS=Mus musculus OX=10090 GN=Tpt1 PE=1 SV=1;tr|D3YU75|D3YU75_MOUSE Translationally-controlled tumor protein OS=Mus musculus OX=10090 GN=Tpt1 PE=1 SV=1	2	4	4	28.5	19.462	172	34.9	28.5	21.5	241990000	99717000	0.412071
P63213	Guanine nucleotide-binding protein G(I)/G(S)/G(O) subunit gamma-2 (G gamma-I)	Gng2	sp|P63213|GBG2_MOUSE Guanine nucleotide-binding protein G(I)/G(S)/G(O) subunit gamma-2 OS=Mus musculus OX=10090 GN=Gng2 PE=1 SV=2	1	4	4	69	7.8501	71	42.256	69	59.2	557740000	534790000	0.958852
P68372;Q9D6F9;Q9CVR0;Q9DCR1;Q99J49;Q62363;G3UZR1;D5MR34	Tubulin beta-4B chain (Tubulin beta-2C chain)	Tubb4b Tubb2c	sp|P68372|TBB4B_MOUSE Tubulin beta-4B chain OS=Mus musculus OX=10090 GN=Tubb4b PE=1 SV=1;sp|Q9D6F9|TBB4A_MOUSE Tubulin beta-4A chain OS=Mus musculus OX=10090 GN=Tubb4a PE=1 SV=3;tr|Q9CVR0|Q9CVR0_MOUSE Tubulin beta chain (Fragment) OS=Mus musculus OX=10090	8	14	4	46.3	49.83	445	195.45	46.3	43.6	8926200000	2143400000	0.240125
P70452;D6RJ29	Syntaxin-4	Stx4 Stx4a	sp|P70452|STX4_MOUSE Syntaxin-4 OS=Mus musculus OX=10090 GN=Stx4 PE=1 SV=1	2	4	4	19.1	34.165	298	27.157	19.1	13.8	120070000	84275000	0.701882
P97300;A0A0A0MQN8;H3BIX4;Z4YLB7;H3BKA7	Neuroplastin (Stromal cell-derived receptor 1) (SDR-1)	Nptn Sdfr1 Sdr1	sp|P97300|NPTN_MOUSE Neuroplastin OS=Mus musculus OX=10090 GN=Nptn PE=1 SV=3;tr|A0A0A0MQN8|A0A0A0MQN8_MOUSE Neuroplastin OS=Mus musculus OX=10090 GN=Nptn PE=1 SV=1;tr|H3BIX4|H3BIX4_MOUSE Neuroplastin (Fragment) OS=Mus musculus OX=10090 GN=Nptn PE=1 SV=1;tr	5	4	4	13.6	44.373	397	34.909	13.6	13.6	542190000	201120000	0.37094
P97450;E9QAD6;Q812D0	ATP synthase-coupling factor 6, mitochondrial (ATPase subunit F6) (ATP synthase peripheral stalk subunit F6)	Atp5pf Atp5j	sp|P97450|ATP5J_MOUSE ATP synthase-coupling factor 6, mitochondrial OS=Mus musculus OX=10090 GN=Atp5pf PE=1 SV=1;tr|E9QAD6|E9QAD6_MOUSE ATP synthase peripheral stalk subunit F6 (Fragment) OS=Mus musculus OX=10090 GN=Atp5j PE=1 SV=8	3	4	4	40.7	12.496	108	27.249	0	40.7	0	222180000	#DIV/0!
Q3U9B7;Q9DCV1;Q8BQL3;Q3UBY5;Q3UAF5;Q3TIF1;P97821;Q3U8J6;Q8C2L5;D3Z220	Cathepsin C (EC 3.4.14.1) (Cathepsin J) (Dipeptidyl peptidase 1) (Dipeptidyl peptidase 1 exclusion domain chain) (Dipeptidyl peptidase 1 heavy chain) (Dipeptidyl peptidase 1 light chain) (Dipeptidyl peptidase I) (Dipeptidyl peptidase I exclusion domain chain) (Dipeptidyl peptidase I heavy chain) (Dipeptidyl peptidase I light chain) (Dipeptidyl transferase) (Fragment)	Ctsc	tr|Q3U9B7|Q3U9B7_MOUSE Cathepsin C (Fragment) OS=Mus musculus OX=10090 GN=Ctsc PE=2 SV=1;tr|Q9DCV1|Q9DCV1_MOUSE Cathepsin C OS=Mus musculus OX=10090 GN=Ctsc PE=2 SV=1;tr|Q8BQL3|Q8BQL3_MOUSE Cathepsin C OS=Mus musculus OX=10090 GN=Ctsc PE=2 SV=1;tr|Q3UBY5|Q	10	4	4	11.2	50.701	447	29.816	6.9	11.2	42973000	288810000	6.72073
Q571F9;P97855;Q3UR88	MKIAA4115 protein (Fragment)	G3bp1 G3bp mKIAA4115	tr|Q571F9|Q571F9_MOUSE MKIAA4115 protein (Fragment) OS=Mus musculus OX=10090 GN=G3bp1 PE=2 SV=1;sp|P97855|G3BP1_MOUSE Ras GTPase-activating protein-binding protein 1 OS=Mus musculus OX=10090 GN=G3bp1 PE=1 SV=1;tr|Q3UR88|Q3UR88_MOUSE NTF2 domain-containing	3	4	4	13.1	56.155	505	28.896	9.3	13.1	48256000	150520000	3.1192
Q04750;Q3ULF5;Q6LBJ1;Q3TSR2	DNA topoisomerase 1 (EC 5.6.2.1) (DNA topoisomerase I)	Top1 Top-1	sp|Q04750|TOP1_MOUSE DNA topoisomerase 1 OS=Mus musculus OX=10090 GN=Top1 PE=1 SV=2;tr|Q3ULF5|Q3ULF5_MOUSE Topoisom_I_N domain-containing protein (Fragment) OS=Mus musculus OX=10090 GN=Top1 PE=2 SV=1	4	4	4	6.5	90.875	767	30.994	5.2	6.5	67255000	268270000	3.98885
Q07417	Short-chain specific acyl-CoA dehydrogenase, mitochondrial (SCAD) (EC 1.3.8.1) (Butyryl-CoA dehydrogenase)	Acads	sp|Q07417|ACADS_MOUSE Short-chain specific acyl-CoA dehydrogenase, mitochondrial OS=Mus musculus OX=10090 GN=Acads PE=1 SV=2	1	4	4	11.9	44.889	412	28.028	6.1	11.9	49293000	62526000	1.26846
Q3UTL4;Q3UGD6;Q09143;Q3TQZ8;E9Q3N1;G3MV68;G3MV66;G3MV65;Q8R2J2	AA_permease_C domain-containing protein	Slc7a1	tr|Q3UTL4|Q3UTL4_MOUSE AA_permease_C domain-containing protein OS=Mus musculus OX=10090 GN=Slc7a1 PE=2 SV=1;tr|Q3UGD6|Q3UGD6_MOUSE Solute carrier family 7 (Cationic amino acid transporter, y+ system), member 1 OS=Mus musculus OX=10090 GN=Slc7a1 PE=1 SV=1;s	9	4	4	9.6	67.107	622	31.45	9.6	4.7	105530000	25744000	0.24395
Q0QEZ4;Q3TE45;Q9CQA3;Q9Z1Z5	Succinate dehydrogenase [ubiquinone] iron-sulfur subunit, mitochondrial (EC 1.3.5.1) (Fragment)	Sdhb SDHB	tr|Q0QEZ4|Q0QEZ4_MOUSE Succinate dehydrogenase [ubiquinone] iron-sulfur subunit, mitochondrial (Fragment) OS=Mus musculus OX=10090 GN=Sdhb PE=2 SV=1;tr|Q3TE45|Q3TE45_MOUSE Succinate dehydrogenase [ubiquinone] iron-sulfur subunit, mitochondrial OS=Mus muscu	4	4	4	19.2	27.208	239	24.797	0	19.2	0	106630000	#DIV/0!
Q14C24;Q9D883;G3UW94;E9PWX6;A0A494BA95;E9PWM2;A0A494B9X9;E9Q809;F8WH71;E9Q5Y2;E9PUZ3;E9Q1I7;E9Q5J3;Q8BGJ9;A0A494B947	U2 small nuclear ribonucleoprotein auxiliary factor (U2AF) 1	U2af1	tr|Q14C24|Q14C24_MOUSE U2 small nuclear ribonucleoprotein auxiliary factor (U2AF) 1 OS=Mus musculus OX=10090 GN=U2af1 PE=1 SV=1;sp|Q9D883|U2AF1_MOUSE Splicing factor U2AF 35 kDa subunit OS=Mus musculus OX=10090 GN=U2af1 PE=1 SV=4;tr|G3UW94|G3UW94_MOUSE Spl	15	4	4	18.8	27.815	239	35.15	11.3	18.8	23146000	326010000	14.0849
Q9DCC5;Q32P00;I6L9I7;P23198;D3Z313;D3Z1A9	Cbx3 protein (Chromobox protein homolog 3)	Cbx3	tr|Q9DCC5|Q9DCC5_MOUSE Cbx3 protein OS=Mus musculus OX=10090 GN=Cbx3 PE=1 SV=1;tr|Q32P00|Q32P00_MOUSE Chromobox homolog 3 (Drosophila HP1 gamma) OS=Mus musculus OX=10090 GN=Cbx3 PE=2 SV=1;tr|I6L9I7|I6L9I7_MOUSE Cbx3 protein OS=Mus musculus OX=10090 GN=Cbx3	6	4	4	37.2	20.811	183	28.749	30.1	37.2	51120000	187480000	3.66745
Q3TA68;Q3TAQ9;Q505Q0;Q6NSU4;Q8VDN1;Q8BHI6;Q3USW8	WD repeat domain 36	Wdr36	tr|Q3TA68|Q3TA68_MOUSE WD repeat domain 36 OS=Mus musculus OX=10090 GN=Wdr36 PE=1 SV=1;tr|Q3TAQ9|Q3TAQ9_MOUSE WD repeat domain 36 OS=Mus musculus OX=10090 GN=Wdr36 PE=1 SV=1;tr|Q505Q0|Q505Q0_MOUSE Wdr36 protein OS=Mus musculus OX=10090 GN=Wdr36 PE=2 SV=1;t	7	4	4	5.4	97.783	883	25.55	4.4	4	17021000	45282000	2.66036
Q3TXG7;Q3TWC7;Q3TBB0;Q3TAV1;Q99P91;Q8BVA0;Q3UE75	PKD domain-containing protein	Gpnmb	tr|Q3TXG7|Q3TXG7_MOUSE PKD domain-containing protein OS=Mus musculus OX=10090 GN=Gpnmb PE=2 SV=1;tr|Q3TWC7|Q3TWC7_MOUSE PKD domain-containing protein OS=Mus musculus OX=10090 GN=Gpnmb PE=2 SV=1;tr|Q3TBB0|Q3TBB0_MOUSE PKD domain-containing protein OS=Mus mu	7	4	4	9.9	63.665	574	30.882	5.6	9.9	150410000	582270000	3.87122
Q3TDD8;Q3UGC0;Q3TSY9;Q3TLQ9;Q8BGD9;Q922K6;Q3THB0;B2RWE8	RRM domain-containing protein	Eif4b	tr|Q3TDD8|Q3TDD8_MOUSE RRM domain-containing protein OS=Mus musculus OX=10090 GN=Eif4b PE=2 SV=1;tr|Q3UGC0|Q3UGC0_MOUSE RRM domain-containing protein OS=Mus musculus OX=10090 GN=Eif4b PE=2 SV=1;tr|Q3TSY9|Q3TSY9_MOUSE RRM domain-containing protein OS=Mus mu	8	4	4	8.9	68.709	609	28.595	8.9	8.9	48884000	56261000	1.15091
Q3THL2;Q542H2;Q3UIT9;Q3TN31;Q9Z2U0;A0A338P7D7;B7ZMS3;Q9CWH6;Q8VEB8;B7ZMS4	Uncharacterized protein	Psma7	tr|Q3THL2|Q3THL2_MOUSE Uncharacterized protein OS=Mus musculus OX=10090 GN=Psma7 PE=2 SV=1;tr|Q542H2|Q542H2_MOUSE Proteasome subunit alpha type OS=Mus musculus OX=10090 GN=Psma7 PE=1 SV=1;tr|Q3UIT9|Q3UIT9_MOUSE Proteasome subunit alpha type OS=Mus musculus	10	4	4	27.5	20.189	178	26.131	21.3	27.5	196020000	191850000	0.978727
Q9CRF5;Q3TQZ0;Q3TI30;Q3THS2;Q3U821;Q3MIA1;Q7TMM0	Uncharacterized protein (Fragment)	Wdr75	tr|Q9CRF5|Q9CRF5_MOUSE Uncharacterized protein (Fragment) OS=Mus musculus OX=10090 GN=Wdr75 PE=2 SV=1;tr|Q3TQZ0|Q3TQZ0_MOUSE Uncharacterized protein (Fragment) OS=Mus musculus OX=10090 GN=Wdr75 PE=2 SV=1;tr|Q3TI30|Q3TI30_MOUSE Uncharacterized protein OS=Mu	7	4	4	7.7	90.099	795	31.185	7.7	4.5	93538000	87303000	0.933343
Q3TIU4	2',5'-phosphodiesterase 12 (2'-PDE) (2-PDE) (EC 3.1.4.-) (Mitochondrial deadenylase) (EC 3.1.13.4)	Pde12	sp|Q3TIU4|PDE12_MOUSE 2,5-phosphodiesterase 12 OS=Mus musculus OX=10090 GN=Pde12 PE=1 SV=2	1	4	4	8.9	67.513	608	42.513	8.9	4.9	70878000	27034000	0.381416
Q3TW21;Q3TJF2;Q9CZ30;B1AYJ9;Q8CAV3;Q99K73	Obg-like ATPase 1	Ola1 Gtpbp9 OLA1	tr|Q3TW21|Q3TW21_MOUSE Obg-like ATPase 1 OS=Mus musculus OX=10090 GN=Ola1 PE=2 SV=1;tr|Q3TJF2|Q3TJF2_MOUSE Obg-like ATPase 1 OS=Mus musculus OX=10090 GN=Ola1 PE=2 SV=1;sp|Q9CZ30|OLA1_MOUSE Obg-like ATPase 1 OS=Mus musculus OX=10090 GN=Ola1 PE=1 SV=1;tr|B1A	6	4	4	10.6	44.742	396	23.876	10.6	6.6	166880000	4079900	0.0244481
Q8C5E7;Q3TJN6;Q9D8U8;Q3TXT4	Sorting nexin	Snx5	tr|Q8C5E7|Q8C5E7_MOUSE Sorting nexin OS=Mus musculus OX=10090 GN=Snx5 PE=2 SV=1;tr|Q3TJN6|Q3TJN6_MOUSE Sorting nexin OS=Mus musculus OX=10090 GN=Snx5 PE=2 SV=1;sp|Q9D8U8|SNX5_MOUSE Sorting nexin-5 OS=Mus musculus OX=10090 GN=Snx5 PE=1 SV=1;tr|Q3TXT4|Q3TXT4	4	4	4	12.4	46.798	404	37.477	12.4	12.4	157010000	125010000	0.796191
Q3TVJ8;Q9D8L3;Q62186;Q9D6F7;Q9DC94	Signal sequence receptor subunit delta (Translocon-associated protein subunit delta)	Ssr4	tr|Q3TVJ8|Q3TVJ8_MOUSE Signal sequence receptor subunit delta OS=Mus musculus OX=10090 GN=Ssr4 PE=1 SV=1;tr|Q9D8L3|Q9D8L3_MOUSE Signal sequence receptor subunit delta OS=Mus musculus OX=10090 GN=Ssr4 PE=1 SV=1;sp|Q62186|SSRD_MOUSE Translocon-associated pro	5	4	4	30.8	18.936	172	28.894	11	30.8	2836500	533850000	188.207
Q99JB5;Q9CPS5;Q8BKP5;Q3TW90;Q3TVY0;Q9CX56;Q3U617;Q3TG45;Q3TI95	26S proteasome non-ATPase regulatory subunit 8	Psmd8	tr|Q99JB5|Q99JB5_MOUSE 26S proteasome non-ATPase regulatory subunit 8 OS=Mus musculus OX=10090 GN=Psmd8 PE=2 SV=1;tr|Q9CPS5|Q9CPS5_MOUSE 26S proteasome non-ATPase regulatory subunit 8 OS=Mus musculus OX=10090 GN=Psmd8 PE=1 SV=2;tr|Q8BKP5|Q8BKP5_MOUSE 26S p	9	4	4	12.5	29.938	257	26.515	12.5	12.5	416620000	289320000	0.694446
Q4FJN2;Q3TX72;Q64378;A0A3B2WBD2;B8JJC2	Peptidylprolyl isomerase (EC 5.2.1.8)	Fkbp5	tr|Q4FJN2|Q4FJN2_MOUSE Peptidylprolyl isomerase OS=Mus musculus OX=10090 GN=Fkbp5 PE=1 SV=1;tr|Q3TX72|Q3TX72_MOUSE Peptidylprolyl isomerase OS=Mus musculus OX=10090 GN=Fkbp5 PE=2 SV=1;sp|Q64378|FKBP5_MOUSE Peptidyl-prolyl cis-trans isomerase FKBP5 OS=Mus m	5	4	4	11	50.966	456	28.938	8.8	11	69231000	229320000	3.31239
Q3TXV4;Q921E2;A2ARZ7;Q9CXG2;Q0PD34;P35285	Rab22B (Ras-related protein Rab-31)	Rab31 Rab22B	tr|Q3TXV4|Q3TXV4_MOUSE Rab22B OS=Mus musculus OX=10090 GN=Rab31 PE=1 SV=1;sp|Q921E2|RAB31_MOUSE Ras-related protein Rab-31 OS=Mus musculus OX=10090 GN=Rab31 PE=1 SV=1	6	4	4	24.6	21.462	195	33.94	24.6	24.6	61510000	82806000	1.34622
Q3U6D2;Q6PFB2;Q8VE37	Uncharacterized protein	Rcc1	tr|Q3U6D2|Q3U6D2_MOUSE Uncharacterized protein OS=Mus musculus OX=10090 GN=Rcc1 PE=2 SV=1;tr|Q6PFB2|Q6PFB2_MOUSE Rcc1 protein OS=Mus musculus OX=10090 GN=Rcc1 PE=1 SV=1;sp|Q8VE37|RCC1_MOUSE Regulator of chromosome condensation OS=Mus musculus OX=10090 GN=R	3	4	4	11.9	44.943	421	31.094	11.9	11.9	137980000	87434000	0.633672
Q3U893;Q8C166;B7ZCP7;B7ZCP6;E9Q806;B7ZCP4;B7ZCP5;A3KGK7;Q571A1;V9GX86;B7ZCP8;V9GWY2;F6R587	C2 domain-containing protein	Cpne1	tr|Q3U893|Q3U893_MOUSE C2 domain-containing protein OS=Mus musculus OX=10090 GN=Cpne1 PE=2 SV=1;sp|Q8C166|CPNE1_MOUSE Copine-1 OS=Mus musculus OX=10090 GN=Cpne1 PE=1 SV=1;tr|B7ZCP7|B7ZCP7_MOUSE Copine-1 (Fragment) OS=Mus musculus OX=10090 GN=Cpne1 PE=1 SV=	13	5	4	8.4	58.928	536	30.251	6.7	8.4	138640000	120280000	0.867571
Q9CT37;Q99KG1;Q3UZI0;Q3UKV5;Q8VHM5;Q3UMT8;Q3U8W9;F7B5B5;A2AW41;V9GWW3;Q8BL32	Uncharacterized protein (Fragment)	Hnrnpr Hnrpr	tr|Q9CT37|Q9CT37_MOUSE Uncharacterized protein (Fragment) OS=Mus musculus OX=10090 GN=Hnrnpr PE=2 SV=3;tr|Q99KG1|Q99KG1_MOUSE Hnrpr protein (Fragment) OS=Mus musculus OX=10090 GN=Hnrnpr PE=2 SV=1;tr|Q3UZI0|Q3UZI0_MOUSE Uncharacterized protein (Fragment) OS	11	7	4	23.4	42.593	381	25.153	23.4	23.4	41263000	96532000	2.33943
Q3U8Y7;A2AGN7;B7ZCF1;Q3TKG4;O88685;Q3THI5;Q3TKC2;Q8BUP7;Q3UD94	AAA domain-containing protein	Psmc3	tr|Q3U8Y7|Q3U8Y7_MOUSE AAA domain-containing protein OS=Mus musculus OX=10090 GN=Psmc3 PE=2 SV=1;tr|A2AGN7|A2AGN7_MOUSE 26S proteasome regulatory subunit 6A OS=Mus musculus OX=10090 GN=Psmc3 PE=1 SV=1;tr|B7ZCF1|B7ZCF1_MOUSE 26S proteasome regulatory subuni	9	16	4	47	47.338	423	126.23	47	44.2	1036400000	554690000	0.535208
Q3U9G9;A0A0A6YWS3;A0A0A6YXW3;A0A0A6YXT6;A0A0A6YW01;A0A0A6YY12	Delta(14)-sterol reductase LBR (Delta-14-SR) (EC 1.3.1.70) (3-beta-hydroxysterol Delta (14)-reductase) (C-14 sterol reductase) (C14SR) (Integral nuclear envelope inner membrane protein) (Lamin-B receptor) (Sterol C14-reductase)	Lbr	sp|Q3U9G9|LBR_MOUSE Delta(14)-sterol reductase LBR OS=Mus musculus OX=10090 GN=Lbr PE=1 SV=2	6	4	4	8.9	71.439	626	33.686	0	8.9	0	201920000	#DIV/0!
Q3UA06;A0A1Y7VLR4	Pachytene checkpoint protein 2 homolog (Thyroid hormone receptor interactor 13) (Thyroid receptor-interacting protein 13) (TR-interacting protein 13) (TRIP-13)	Trip13 Pch2	sp|Q3UA06|PCH2_MOUSE Pachytene checkpoint protein 2 homolog OS=Mus musculus OX=10090 GN=Trip13 PE=1 SV=1	2	4	4	11.1	48.376	432	25.648	6.2	11.1	29871000	56074000	1.87721
Q3UB60;Q9CR16;Q8BMX6	Uncharacterized protein	Ppid	tr|Q3UB60|Q3UB60_MOUSE Uncharacterized protein OS=Mus musculus OX=10090 GN=Ppid PE=2 SV=1;sp|Q9CR16|PPID_MOUSE Peptidyl-prolyl cis-trans isomerase D OS=Mus musculus OX=10090 GN=Ppid PE=1 SV=3	3	4	4	11.6	40.742	370	30.716	11.6	11.6	347880000	157500000	0.452742
Q3UHJ0;A0A571BDM4	AP2-associated protein kinase 1 (EC 2.7.11.1) (Adaptor-associated kinase 1)	Aak1 Kiaa1048	sp|Q3UHJ0|AAK1_MOUSE AP2-associated protein kinase 1 OS=Mus musculus OX=10090 GN=Aak1 PE=1 SV=2	2	4	4	6.4	103.35	959	30.485	6.4	6.4	115560000	86475000	0.748313
Q3V3N5;Q3UJL0;Q99LH1;P70410	Nucleolar GTP-binding protein 2 (Fragment)	Gnl2	tr|Q3V3N5|Q3V3N5_MOUSE Nucleolar GTP-binding protein 2 (Fragment) OS=Mus musculus OX=10090 GN=Gnl2 PE=2 SV=1;tr|Q3UJL0|Q3UJL0_MOUSE Nucleolar GTP-binding protein 2 OS=Mus musculus OX=10090 GN=Gnl2 PE=2 SV=1;sp|Q99LH1|NOG2_MOUSE Nucleolar GTP-binding protei	4	4	4	9.9	72.1	635	31.962	0	9.9	0	64392000	#DIV/0!
Q3UL02;Q8BPH0;Q8CCV1;Q8R050;Q149F3;F7CE88	Tr-type G domain-containing protein (Fragment)	Gspt1	tr|Q3UL02|Q3UL02_MOUSE Tr-type G domain-containing protein (Fragment) OS=Mus musculus OX=10090 GN=Gspt1 PE=2 SV=1;tr|Q8BPH0|Q8BPH0_MOUSE Tr-type G domain-containing protein (Fragment) OS=Mus musculus OX=10090 GN=Gspt1 PE=2 SV=1;tr|Q8CCV1|Q8CCV1_MOUSE Tr-ty	6	4	4	13.5	43.232	385	23.909	13.5	13.5	152470000	132030000	0.865941
Q3URM4;Q9D1Q6	Thioredoxin domain-containing protein	Erp44 Txndc4	tr|Q3URM4|Q3URM4_MOUSE Thioredoxin domain-containing protein OS=Mus musculus OX=10090 GN=Erp44 PE=2 SV=1;sp|Q9D1Q6|ERP44_MOUSE Endoplasmic reticulum resident protein 44 OS=Mus musculus OX=10090 GN=Erp44 PE=1 SV=1	2	4	4	10.8	46.746	406	31.149	3.4	10.8	73289000	80597000	1.09971
Q3USC0;Q8BQM4;Q8K2Q1;E9PWH6	Uncharacterized protein	Heatr3	tr|Q3USC0|Q3USC0_MOUSE Uncharacterized protein OS=Mus musculus OX=10090 GN=Heatr3 PE=2 SV=1;sp|Q8BQM4|HEAT3_MOUSE HEAT repeat-containing protein 3 OS=Mus musculus OX=10090 GN=Heatr3 PE=1 SV=1;tr|Q8K2Q1|Q8K2Q1_MOUSE Heatr3 protein (Fragment) OS=Mus musculus	4	4	4	6	74.289	679	23.797	4.9	6	51908000	48125000	0.927121
Q3UT19;Q922U1;E0CYD0	Pre-mRNA-splicing factor 3 (U4/U6 small nuclear ribonucleoprotein Prp3)	Prpf3	tr|Q3UT19|Q3UT19_MOUSE Pre-mRNA-splicing factor 3 OS=Mus musculus OX=10090 GN=Prpf3 PE=2 SV=1;sp|Q922U1|PRPF3_MOUSE U4/U6 small nuclear ribonucleoprotein Prp3 OS=Mus musculus OX=10090 GN=Prpf3 PE=1 SV=1;tr|E0CYD0|E0CYD0_MOUSE U4/U6 small nuclear ribonucleo	3	4	4	7	77.264	683	27.46	0	7	0	146610000	#DIV/0!
Q3UW40;Q8BP67;Q8BT08;Q9CS31	TRASH domain-containing protein	Rpl24	tr|Q3UW40|Q3UW40_MOUSE TRASH domain-containing protein OS=Mus musculus OX=10090 GN=Rpl24 PE=2 SV=1;sp|Q8BP67|RL24_MOUSE 60S ribosomal protein L24 OS=Mus musculus OX=10090 GN=Rpl24 PE=1 SV=2;tr|Q8BT08|Q8BT08_MOUSE TRASH domain-containing protein (Fragment)	4	4	4	24.4	18.252	160	27.615	24.4	24.4	112510000	1135700000	10.0942
Q4VAE6;Q9QUI0;A0A0A6YXF6;Q3TN61;Q9CR99;C0IQA7;A0A0A6YWJ1;Q4FJM5;Q3TIC2;P62746	Ras family member A (Ras homolog gene family, member A)	Rhoa	tr|Q4VAE6|Q4VAE6_MOUSE Ras family member A OS=Mus musculus OX=10090 GN=Rhoa PE=1 SV=1;sp|Q9QUI0|RHOA_MOUSE Transforming protein RhoA OS=Mus musculus OX=10090 GN=Rhoa PE=1 SV=1;tr|A0A0A6YXF6|A0A0A6YXF6_MOUSE Transforming protein RhoA (Fragment) OS=Mus muscu	10	9	4	51.3	21.782	193	86.676	51.3	51.3	1922700000	730040000	0.379695
Q8K265;Q4VBE8	WD repeat-containing protein 18 (Fragment)	Wdr18	tr|Q8K265|Q8K265_MOUSE WD repeat-containing protein 18 (Fragment) OS=Mus musculus OX=10090 GN=Wdr18 PE=2 SV=1;sp|Q4VBE8|WDR18_MOUSE WD repeat-containing protein 18 OS=Mus musculus OX=10090 GN=Wdr18 PE=1 SV=1	2	4	4	13.9	36.595	332	28.475	3.6	13.9	10616000	175350000	16.5175
Q52KP0;Q9JJI8	60S ribosomal protein L38	Rpl38	tr|Q52KP0|Q52KP0_MOUSE 60S ribosomal protein L38 OS=Mus musculus OX=10090 GN=Rpl38 PE=1 SV=1;sp|Q9JJI8|RL38_MOUSE 60S ribosomal protein L38 OS=Mus musculus OX=10090 GN=Rpl38 PE=1 SV=3	2	4	4	32.9	8.2038	70	28.454	32.9	32.9	32838000	224930000	6.84969
Q571K5;Q6DI95;Q6P2B1;Q9CSV3;F6TDZ2	MKIAA4133 protein (Fragment)	Tnpo3 mKIAA4133	tr|Q571K5|Q571K5_MOUSE MKIAA4133 protein (Fragment) OS=Mus musculus OX=10090 GN=Tnpo3 PE=2 SV=1;tr|Q6DI95|Q6DI95_MOUSE Transportin 3 OS=Mus musculus OX=10090 GN=Tnpo3 PE=2 SV=1;sp|Q6P2B1|TNPO3_MOUSE Transportin-3 OS=Mus musculus OX=10090 GN=Tnpo3 PE=1 SV=1	5	4	4	10.6	66.149	584	24.308	10.6	5.3	35214000	25683000	0.729341
Q5SWD9	Pre-rRNA-processing protein TSR1 homolog	Tsr1 Kiaa1401	sp|Q5SWD9|TSR1_MOUSE Pre-rRNA-processing protein TSR1 homolog OS=Mus musculus OX=10090 GN=Tsr1 PE=1 SV=1	1	4	4	6.6	92.104	803	31.154	6.6	6.6	105840000	56985000	0.538407
Q5U4D9;D3Z132	THO complex subunit 6 homolog (WD repeat-containing protein 58)	Thoc6 Wdr58	sp|Q5U4D9|THOC6_MOUSE THO complex subunit 6 homolog OS=Mus musculus OX=10090 GN=Thoc6 PE=1 SV=1;tr|D3Z132|D3Z132_MOUSE THO complex subunit 6 homolog OS=Mus musculus OX=10090 GN=Thoc6 PE=1 SV=1	2	4	4	16.7	37.314	341	29.539	16.7	16.7	51473000	54769000	1.06403
Z4YJV4;Q60597;B2RXT3;E9Q7L0	2-oxoglutarate dehydrogenase, mitochondrial	Ogdh	tr|Z4YJV4|Z4YJV4_MOUSE 2-oxoglutarate dehydrogenase, mitochondrial OS=Mus musculus OX=10090 GN=Ogdh PE=1 SV=1;sp|Q60597|ODO1_MOUSE 2-oxoglutarate dehydrogenase, mitochondrial OS=Mus musculus OX=10090 GN=Ogdh PE=1 SV=3	4	4	4	4.5	116.03	1019	23.609	2.1	4.5	21820000	71970000	3.29835
Q60710;Q6ZQM3;Q3TCJ7;F6TVP2;Q8C5C0;E9PYG9;Q3UDX7	Deoxynucleoside triphosphate triphosphohydrolase SAMHD1 (dNTPase) (EC 3.1.5.-) (Interferon-gamma-inducible protein Mg11) (SAM domain and HD domain-containing protein 1) (mSAMHD1)	Samhd1 Mg21	sp|Q60710|SAMH1_MOUSE Deoxynucleoside triphosphate triphosphohydrolase SAMHD1 OS=Mus musculus OX=10090 GN=Samhd1 PE=1 SV=3;tr|Q6ZQM3|Q6ZQM3_MOUSE cDNA fis, clone TRACH3010757, highly similar to Interferon-gamma inducible protein MG11 OS=Mus musculus OX=100	7	4	4	8.1	75.892	658	26.344	8.1	5	50397000	58030000	1.15146
Q61655;Q8R3C7;Q8BZY3	ATP-dependent RNA helicase DDX19A (EC 3.6.4.13) (DEAD box RNA helicase DEAD5) (mDEAD5) (DEAD box protein 19A) (Eukaryotic translation initiation factor 4A-related sequence 1)	Ddx19a Ddx19 Eif4a-rs1	sp|Q61655|DD19A_MOUSE ATP-dependent RNA helicase DDX19A OS=Mus musculus OX=10090 GN=Ddx19a PE=1 SV=2;tr|Q8R3C7|Q8R3C7_MOUSE RNA helicase OS=Mus musculus OX=10090 GN=Ddx19b PE=1 SV=1;tr|Q8BZY3|Q8BZY3_MOUSE RNA helicase OS=Mus musculus OX=10090 GN=Ddx19b PE=	3	4	4	13	53.932	478	31.247	6.3	13	58609000	71649000	1.22249
Q61975	Env polypeptide (Fragment)		tr|Q61975|Q61975_MOUSE Env polypeptide (Fragment) OS=Mus musculus OX=10090 PE=4 SV=1	1	5	4	18.3	35.343	328	62.907	13.7	15.9	845680000	381440000	0.451045
Q6P5E4;G3UY73;B0LAE5;Q8BWM7	UDP-glucose:glycoprotein glucosyltransferase 1 (UGT1) (EC 2.4.1.-) (UDP--Glc:glycoprotein glucosyltransferase) (UDP-glucose ceramide glucosyltransferase-like 1)	Uggt1 Gt Ugcgl1 Uggt Ugt1 Ugtr	sp|Q6P5E4|UGGG1_MOUSE UDP-glucose:glycoprotein glucosyltransferase 1 OS=Mus musculus OX=10090 GN=Uggt1 PE=1 SV=4	4	4	4	3.3	176.43	1551	22.462	0	3.3	0	86919000	#DIV/0!
Q6P5F6;A0A087WRC8;A0A087WQF7	Zinc transporter ZIP10 (Solute carrier family 39 member 10) (Zrt- and Irt-like protein 10) (ZIP-10)	Slc39a10 Kiaa1265 Zip10	sp|Q6P5F6|S39AA_MOUSE Zinc transporter ZIP10 OS=Mus musculus OX=10090 GN=Slc39a10 PE=1 SV=1;tr|A0A087WRC8|A0A087WRC8_MOUSE Zinc transporter ZIP10 (Fragment) OS=Mus musculus OX=10090 GN=Slc39a10 PE=1 SV=1;tr|A0A087WQF7|A0A087WQF7_MOUSE Zinc transporter ZIP1	3	4	4	7.7	94.393	833	29.156	7.7	2.3	101050000	30947000	0.306254
Q6PAR5;F7ADS7;F6X819;F7ADQ2;F6UFP6;E9Q0D1;F7ADT6	GTPase-activating protein and VPS9 domain-containing protein 1 (GAPex-5) (Rab5-activating protein 6)	Gapvd1 Gapex5 Kiaa1521	sp|Q6PAR5|GAPD1_MOUSE GTPase-activating protein and VPS9 domain-containing protein 1 OS=Mus musculus OX=10090 GN=Gapvd1 PE=1 SV=2;tr|F7ADS7|F7ADS7_MOUSE GTPase-activating protein and VPS9 domain-containing protein 1 (Fragment) OS=Mus musculus OX=10090 GN=G	7	4	4	4.5	162.4	1458	28.359	2.6	4.5	97542000	79590000	0.815956
Q6PB44	Tyrosine-protein phosphatase non-receptor type 23 (EC 3.1.3.48)	Ptpn23 Kiaa1471	sp|Q6PB44|PTN23_MOUSE Tyrosine-protein phosphatase non-receptor type 23 OS=Mus musculus OX=10090 GN=Ptpn23 PE=1 SV=2	1	4	4	3.6	185.21	1692	41.217	2.8	2.2	85671000	47968000	0.559909
Q8BHB4	WD repeat-containing protein 3	Wdr3	sp|Q8BHB4|WDR3_MOUSE WD repeat-containing protein 3 OS=Mus musculus OX=10090 GN=Wdr3 PE=1 SV=1	1	4	4	5.2	105.77	942	26.99	5.2	5.2	114290000	138640000	1.21305
Q8BKE6;Q80Y48	Cytochrome P450 20A1 (EC 1.14.-.-)	Cyp20a1	sp|Q8BKE6|CP20A_MOUSE Cytochrome P450 20A1 OS=Mus musculus OX=10090 GN=Cyp20a1 PE=1 SV=1;tr|Q80Y48|Q80Y48_MOUSE Cyp20a1 protein OS=Mus musculus OX=10090 GN=Cyp20a1 PE=2 SV=1	2	4	4	10.6	52.149	462	28.965	0	10.6	0	126720000	#DIV/0!
Q8BMY3;Q91VE6	Uncharacterized protein (Fragment)	Nifk Mki67ip	tr|Q8BMY3|Q8BMY3_MOUSE Uncharacterized protein (Fragment) OS=Mus musculus OX=10090 GN=Nifk PE=2 SV=1;sp|Q91VE6|MK67I_MOUSE MKI67 FHA domain-interacting nucleolar phosphoprotein OS=Mus musculus OX=10090 GN=Nifk PE=1 SV=1	2	4	4	83.8	3.9505	37	25.776	83.8	83.8	34213000	147190000	4.30217
Q8BXV2;A0A0G2JGE0	BRI3-binding protein (I3-binding protein)	Bri3bp	sp|Q8BXV2|BRI3B_MOUSE BRI3-binding protein OS=Mus musculus OX=10090 GN=Bri3bp PE=1 SV=1	2	4	4	19.4	28.263	253	27.392	2.8	19.4	13199000	418320000	31.6933
Q91Z50;Q8R069;Q8C952;Q8C5X6;Q99M86;Q3TGH6;P39749	Flap endonuclease 1 (FEN-1) (EC 3.1.-.-) (Flap structure-specific endonuclease 1)	Fen1 FEN1	tr|Q91Z50|Q91Z50_MOUSE Flap endonuclease 1 OS=Mus musculus OX=10090 GN=Fen1 PE=1 SV=1;tr|Q8R069|Q8R069_MOUSE Flap endonuclease 1 OS=Mus musculus OX=10090 GN=Fen1 PE=2 SV=1;tr|Q8C952|Q8C952_MOUSE Flap endonuclease 1 OS=Mus musculus OX=10090 GN=Fen1 PE=2 SV=	7	4	4	16.6	42.623	380	27.237	16.6	5.8	149800000	130720000	0.87263
Q8CCF0	U4/U6 small nuclear ribonucleoprotein Prp31 (Pre-mRNA-processing factor 31) (U4/U6 snRNP 61 kDa protein) (Protein 61K)	Prpf31 Prp31	sp|Q8CCF0|PRP31_MOUSE U4/U6 small nuclear ribonucleoprotein Prp31 OS=Mus musculus OX=10090 GN=Prpf31 PE=1 SV=3	1	4	4	10.4	55.429	499	26.619	1.6	10.4	0	62943000	#DIV/0!
Q8CIH5	1-phosphatidylinositol 4,5-bisphosphate phosphodiesterase gamma-2 (EC 3.1.4.11) (Phosphoinositide phospholipase C-gamma-2) (Phospholipase C-gamma-2) (PLC-gamma-2)	Plcg2	sp|Q8CIH5|PLCG2_MOUSE 1-phosphatidylinositol 4,5-bisphosphate phosphodiesterase gamma-2 OS=Mus musculus OX=10090 GN=Plcg2 PE=1 SV=1	1	4	4	3.2	147.59	1265	23.776	3.2	3.2	63910000	41373000	0.647363
Q8K124	Pleckstrin homology domain-containing family O member 2 (PH domain-containing family O member 2) (Pleckstrin homology domain-containing family Q member 1) (PH domain-containing family Q member 1)	Plekho2 Plekhq1	sp|Q8K124|PKHO2_MOUSE Pleckstrin homology domain-containing family O member 2 OS=Mus musculus OX=10090 GN=Plekho2 PE=1 SV=1	1	4	4	12.1	53.872	495	25.886	10.1	10.5	36667000	55848000	1.52311
Q8K297	Procollagen galactosyltransferase 1 (EC 2.4.1.50) (Collagen beta(1-O)galactosyltransferase 1) (Glycosyltransferase 25 family member 1) (Hydroxylysine galactosyltransferase 1)	Colgalt1 Glt25d1	sp|Q8K297|GT251_MOUSE Procollagen galactosyltransferase 1 OS=Mus musculus OX=10090 GN=Colgalt1 PE=1 SV=2	1	4	4	7.6	71.06	617	33.997	2.8	7.6	2826100	101580000	35.9435
Q8VDP4	Cell cycle and apoptosis regulator protein 2 (Cell division cycle and apoptosis regulator protein 2)	Ccar2	sp|Q8VDP4|CCAR2_MOUSE Cell cycle and apoptosis regulator protein 2 OS=Mus musculus OX=10090 GN=Ccar2 PE=1 SV=2	1	4	4	6.2	103	922	27.582	4.2	6.2	30317000	67565000	2.22862
Q921H8;Q8BLD7;H3BJZ9;H3BKL5;Q3UPU8;Q8R343;Q3TUU3;Q3UKM0;Q8VCH0;H3BKA1	3-ketoacyl-CoA thiolase A, peroxisomal (EC 2.3.1.16) (Acetyl-CoA C-myristoyltransferase) (EC 2.3.1.155) (Acetyl-CoA acyltransferase A) (EC 2.3.1.9) (Beta-ketothiolase A) (Peroxisomal 3-oxoacyl-CoA thiolase A)	Acaa1a Acaa1	sp|Q921H8|THIKA_MOUSE 3-ketoacyl-CoA thiolase A, peroxisomal OS=Mus musculus OX=10090 GN=Acaa1a PE=1 SV=1;tr|Q8BLD7|Q8BLD7_MOUSE Uncharacterized protein OS=Mus musculus OX=10090 GN=Acaa1a PE=2 SV=1;tr|H3BJZ9|H3BJZ9_MOUSE 3-ketoacyl-CoA thiolase A, peroxiso	10	4	4	14.6	43.953	424	24.875	3.1	14.6	3516300	74398000	21.158
Q921M7;A0A2I3BRN5;A0A2I3BPH9;A0A2I3BQK1	CYFIP-related Rac1 interactor B (Protein FAM49B)	Cyrib Cyri Fam49b	sp|Q921M7|CYRIB_MOUSE CYFIP-related Rac1 interactor B OS=Mus musculus OX=10090 GN=Cyrib PE=1 SV=1;tr|A0A2I3BRN5|A0A2I3BRN5_MOUSE CYFIP-related Rac1 interactor B (Fragment) OS=Mus musculus OX=10090 GN=Cyrib PE=1 SV=1	4	5	4	25.3	36.776	324	54.329	25.3	12.3	65545000	25393000	0.387413
Q925I1;H3BK90	ATPase family AAA domain-containing protein 3 (AAA-ATPase TOB3)	Atad3 Atad3a Kiaa1273	sp|Q925I1|ATAD3_MOUSE ATPase family AAA domain-containing protein 3 OS=Mus musculus OX=10090 GN=Atad3 PE=1 SV=1;tr|H3BK90|H3BK90_MOUSE ATPase family, AAA domain-containing 3A (Fragment) OS=Mus musculus OX=10090 GN=Atad3a PE=1 SV=1	2	4	4	8	66.741	591	25.963	0	8	0	51957000	#DIV/0!
Q99J77;Q3TFB5	Sialic acid synthase (N-acetylneuraminate-9-phosphate synthase) (EC 2.5.1.57) (N-acetylneuraminic acid phosphate synthase)	Nans Sas	sp|Q99J77|SIAS_MOUSE Sialic acid synthase OS=Mus musculus OX=10090 GN=Nans PE=1 SV=1	2	4	4	15	40.024	359	27.529	15	3.9	155400000	26849000	0.172773
Q9CPN8;A6X8Z3;Q5SF07	Insulin-like growth factor 2 mRNA-binding protein 3 (IGF2 mRNA-binding protein 3) (IMP-3) (mIMP-3) (IGF-II mRNA-binding protein 3) (VICKZ family member 3)	Igf2bp3 Vickz3	sp|Q9CPN8|IF2B3_MOUSE Insulin-like growth factor 2 mRNA-binding protein 3 OS=Mus musculus OX=10090 GN=Igf2bp3 PE=1 SV=1	3	4	4	8.6	63.574	579	28.141	6.9	6.9	28916000	117310000	4.05692
Q9CQB4;Q9D855	Cytochrome b-c1 complex subunit 7	Uqcrb	tr|Q9CQB4|Q9CQB4_MOUSE Cytochrome b-c1 complex subunit 7 OS=Mus musculus OX=10090 GN=Uqcrb PE=1 SV=1;sp|Q9D855|QCR7_MOUSE Cytochrome b-c1 complex subunit 7 OS=Mus musculus OX=10090 GN=Uqcrb PE=1 SV=3	2	4	4	36	13.561	111	26.775	0	36	0	284650000	#DIV/0!
Q9CQD1;A2A5F5;Q8C458;A2A5F6	Ras-related protein Rab-5A (EC 3.6.5.2)	Rab5a nnyRab5a	sp|Q9CQD1|RAB5A_MOUSE Ras-related protein Rab-5A OS=Mus musculus OX=10090 GN=Rab5a PE=1 SV=1	4	6	4	36.7	23.598	215	35.352	27.9	36.7	96735000	107480000	1.11108
Q9CQT1;F8WI95;F6YY88	Methylthioribose-1-phosphate isomerase (M1Pi) (MTR-1-P isomerase) (EC 5.3.1.23) (S-methyl-5-thioribose-1-phosphate isomerase) (Translation initiation factor eIF-2B subunit alpha/beta/delta-like protein)	Mri1	sp|Q9CQT1|MTNA_MOUSE Methylthioribose-1-phosphate isomerase OS=Mus musculus OX=10090 GN=Mri1 PE=1 SV=1;tr|F8WI95|F8WI95_MOUSE Methylthioribose-1-phosphate isomerase (Fragment) OS=Mus musculus OX=10090 GN=Mri1 PE=1 SV=1;tr|F6YY88|F6YY88_MOUSE Methylthioribo	3	4	4	13.3	39.41	369	32.197	10.8	10.8	97084000	84799000	0.87346
Q9CQX2;Q3TH64;Q3TN44;Q3TLE8	Cytochrome b5 type B (Cytochrome b5 outer mitochondrial membrane isoform)	Cyb5b Cyb5m	sp|Q9CQX2|CYB5B_MOUSE Cytochrome b5 type B OS=Mus musculus OX=10090 GN=Cyb5b PE=1 SV=1;tr|Q3TH64|Q3TH64_MOUSE Cytochrome b5 heme-binding domain-containing protein OS=Mus musculus OX=10090 GN=Cyb5b PE=2 SV=1;tr|Q3TN44|Q3TN44_MOUSE Cytochrome b5 heme-binding	4	4	4	50	16.318	146	29.886	8.9	50	7320600	593510000	81.074
Q9CXW3;A0A0A6YY29	Calcyclin-binding protein (CacyBP) (Siah-interacting protein)	Cacybp Sip	sp|Q9CXW3|CYBP_MOUSE Calcyclin-binding protein OS=Mus musculus OX=10090 GN=Cacybp PE=1 SV=1;tr|A0A0A6YY29|A0A0A6YY29_MOUSE Calcyclin-binding protein (Fragment) OS=Mus musculus OX=10090 GN=Cacybp PE=1 SV=1	2	4	4	20.5	26.51	229	25.241	20.5	3.9	190150000	48531000	0.255225
Q9D0M3;A0A2R8VHK1	Cytochrome c1, heme protein, mitochondrial (EC 7.1.1.8) (Complex III subunit 4) (Complex III subunit IV) (Cytochrome b-c1 complex subunit 4) (Ubiquinol-cytochrome-c reductase complex cytochrome c1 subunit) (Cytochrome c-1)	Cyc1	sp|Q9D0M3|CY1_MOUSE Cytochrome c1, heme protein, mitochondrial OS=Mus musculus OX=10090 GN=Cyc1 PE=1 SV=1;tr|A0A2R8VHK1|A0A2R8VHK1_MOUSE Cytochrome c1, heme protein, mitochondrial (Fragment) OS=Mus musculus OX=10090 GN=Cyc1 PE=1 SV=1	2	4	4	18.5	35.327	325	29.083	0	18.5	0	179510000	#DIV/0!
Q9D1D4;Q3UFG5;A0A1Y7VM54	Transmembrane emp24 domain-containing protein 10 (Protein Tmed10) (21 kDa transmembrane-trafficking protein) (Transmembrane protein Tmp21) (p24 family protein delta-1) (p24delta1)	Tmed10 Tmp21	sp|Q9D1D4|TMEDA_MOUSE Transmembrane emp24 domain-containing protein 10 OS=Mus musculus OX=10090 GN=Tmed10 PE=1 SV=1;tr|Q3UFG5|Q3UFG5_MOUSE Uncharacterized protein OS=Mus musculus OX=10090 PE=2 SV=1	3	4	4	24.7	24.911	219	34.403	5.5	24.7	13311000	353990000	26.5938
Q9DBG7;F6VF36;Q9CVL8	Signal recognition particle receptor subunit alpha (SR-alpha) (Docking protein alpha) (DP-alpha)	Srpra Srpr	sp|Q9DBG7|SRPRA_MOUSE Signal recognition particle receptor subunit alpha OS=Mus musculus OX=10090 GN=Srpra PE=1 SV=1;tr|F6VF36|F6VF36_MOUSE Signal recognition particle receptor (docking protein) (Fragment) OS=Mus musculus OX=10090 GN=Srpr PE=1 SV=1	3	4	4	8.2	69.622	636	32.812	3.8	8.2	13259000	148110000	11.1705
Q9DBH5	Vesicular integral-membrane protein VIP36 (Lectin mannose-binding 2) (Vesicular integral-membrane protein 36) (VIP36)	Lman2	sp|Q9DBH5|LMAN2_MOUSE Vesicular integral-membrane protein VIP36 OS=Mus musculus OX=10090 GN=Lman2 PE=1 SV=2	1	4	4	12	40.429	358	34.683	12	12	232430000	477930000	2.05623
Q9DBR1	5'-3' exoribonuclease 2 (EC 3.1.13.-) (Protein Dhm1)	Xrn2 Dhm1	sp|Q9DBR1|XRN2_MOUSE 5-3 exoribonuclease 2 OS=Mus musculus OX=10090 GN=Xrn2 PE=1 SV=1	1	4	4	5.4	108.69	951	28.923	2.8	5.4	70952000	32253000	0.454575
Q9DBZ5;Q3TY56;A0A140LJ59	Eukaryotic translation initiation factor 3 subunit K (eIF3k) (Eukaryotic translation initiation factor 3 subunit 12) (eIF-3 p25)	Eif3k Eif3s12	sp|Q9DBZ5|EIF3K_MOUSE Eukaryotic translation initiation factor 3 subunit K OS=Mus musculus OX=10090 GN=Eif3k PE=1 SV=1;tr|Q3TY56|Q3TY56_MOUSE Eukaryotic translation initiation factor 3 subunit K OS=Mus musculus OX=10090 GN=Eif3k PE=1 SV=1;tr|A0A140LJ59|A0A	3	4	4	22.5	25.086	218	36.243	22.5	12.8	310190000	97898000	0.315607
Q9EPE9;Q69Z96	Endoplasmic reticulum transmembrane helix translocase (EC 7.4.2.-) (Endoplasmic reticulum P5A-ATPase)	Atp13a1 Atp13a	sp|Q9EPE9|AT131_MOUSE Endoplasmic reticulum transmembrane helix translocase OS=Mus musculus OX=10090 GN=Atp13a1 PE=1 SV=2;tr|Q69Z96|Q69Z96_MOUSE MKIAA1825 protein (Fragment) OS=Mus musculus OX=10090 GN=mKIAA1825 PE=4 SV=1	2	4	4	4.2	132.39	1200	30.658	0	4.2	0	102930000	#DIV/0!
Q9ERU9;Q8BQK6	E3 SUMO-protein ligase RanBP2 (EC 2.3.2.-) (Ran-binding protein 2) (RanBP2)	Ranbp2	sp|Q9ERU9|RBP2_MOUSE E3 SUMO-protein ligase RanBP2 OS=Mus musculus OX=10090 GN=Ranbp2 PE=1 SV=2	2	4	4	1.6	341.12	3053	24.995	0.4	1.6	3908200	49416000	12.6442
[truncated: 1,518 more rows]

## Sheet: Exosome
Protein IDs	Protein names	Gene names	Fasta headers	Number of proteins	Peptides	Unique peptides	Sequence coverage [%]	Mol. weight [kDa]	Sequence length	Score	Sequence coverage Exosome [%]	Sequence coverage Membrane [%]	LFQ intensity Exosome	LFQ intensity Membrane	Ratio(Membrane/Exosome)
[truncated: 1,975 more rows]

[truncated: 1 more sheets: Membrane]
